# Supplementary material
Source: Frontiers journal article supplement (https://www.frontiersin.org/articles/554046)
Supplement: Data_Sheet_1.PDF [file Data_Sheet_1.PDF]

## *Supplementary Material*

### **Stability of floodplain subsurface microbial communities through seasonal hydrological and geochemical cycles**

**Bradley B. Tolar, Kristin Boye, Callum Bobb, Kate Maher, John R. Bargar, and Christopher A. Francis**

#### **1 Supplementary Data**

#### **2 Supplementary Figures and Tables**

##### **2.1 Supplementary Tables**

**Table S1.** Summary of sample data collected at the Riverton, WY, site during the 2017 field season. See included Excel file: “TableS1\_Sample\_Data.xlsx”.

**Table S2.** Summary of taxonomic data, including OTUs, from sequencing of sediment samples collected during 2017. See included Excel file: “TableS2\_OTU\_Data.xlsx”.

**Table S3.** Analysis of molecular variance (AMOVA) and homogeneity of molecular variance (HOMOVA) of microbial communities grouped by Soil Horizon (Depth)

| AMOVA (Community Difference) - Soil Horizon |          |          |          |         |       |      | HOMOVA (Community Stability) - Soil Horizon |        |        |        |         |        |      |
|---------------------------------------------|----------|----------|----------|---------|-------|------|---------------------------------------------|--------|--------|--------|---------|--------|------|
| Topsoil                                     | April    | May      | July 7   | July 25 | Aug   | Sept | Topsoil                                     | April  | May    | July 7 | July 25 | Aug    | Sept |
| April                                       |          |          |          |         |       |      | April                                       |        |        |        |         |        |      |
| May                                         | 0.221    |          |          |         |       |      | May                                         | <0.001 |        |        |         |        |      |
| July 7                                      | 0.393    | 1        |          |         |       |      | July 7                                      | 0.412  | <0.001 |        |         |        |      |
| July 25                                     | 0.183    | 1        | 1        |         |       |      | July 25                                     | <0.001 | <0.001 | <0.001 |         |        |      |
| Aug                                         | 0.584    | 1        | 0.66     | 1       |       |      | Aug                                         | <0.001 | <0.001 | <0.001 | <0.001  |        |      |
| Sept                                        | 0.264    | 1        | 1        | 1       | 0.67  |      | Sept                                        | 0.469  | <0.001 | 1      | <0.001  | <0.001 |      |
| Evaporite                                   | April    | May      | July 7   | July 25 | Aug   | Sept | Evaporite                                   | April  | May    | July 7 | July 25 | Aug    | Sept |
| April                                       |          |          |          |         |       |      | April                                       |        |        |        |         |        |      |
| May                                         | 0.128    |          |          |         |       |      | May                                         | 0.236  |        |        |         |        |      |
| July 7                                      | 0.108    | 0.597    |          |         |       |      | July 7                                      | 0.66   | 0.259  |        |         |        |      |
| July 25                                     | 0.18     | 0.84     | 0.532    |         |       |      | July 25                                     | 0.611  | 0.036  | 0.673  |         |        |      |
| Aug                                         | 0.202    | 0.48     | 0.524    | 0.707   |       |      | Aug                                         | 0.357  | 0.173  | 0.89   | 0.922   |        |      |
| Sept                                        | 0.09     | 0.229    | 0.517    | 0.41    | 0.71  |      | Sept                                        | 0.873  | 0.731  | 0.437  | 0.731   | 0.609  |      |
| Sand                                        | April    | May      | July 7   | July 25 | Aug   | Sept | Sand                                        | April  | May    | July 7 | July 25 | Aug    | Sept |
| April                                       |          |          |          |         |       |      | April                                       |        |        |        |         |        |      |
| May                                         | 0.069    |          |          |         |       |      | May                                         | 0.134  |        |        |         |        |      |
| July 7                                      | 0.205    | 0.347    |          |         |       |      | July 7                                      | <0.001 | <0.001 |        |         |        |      |
| July 25                                     | 0.194    | 0.31     | 1        |         |       |      | July 25                                     | <0.001 | <0.001 | <0.001 |         |        |      |
| Aug                                         | 0.133    | 0.103    | 0.243    | 0.274   |       |      | Aug                                         | 0.937  | 0.091  | <0.001 | <0.001  |        |      |
| Sept                                        | 0.137    | 0.318    | 0.343    | 0.341   | 0.389 |      | Sept                                        | 0.942  | 0.335  | <0.001 | <0.001  | 0.888  |      |
| EvapClay                                    | April    | May      | July 7   | July 25 | Aug   | Sept | EvapClay                                    | April  | May    | July 7 | July 25 | Aug    | Sept |
| April                                       |          |          |          |         |       |      | April                                       |        |        |        |         |        |      |
| May                                         | 0.066    |          |          |         |       |      | May                                         | 0.117  |        |        |         |        |      |
| July 7                                      | 0.091    | 0.364    |          |         |       |      | July 7                                      | <0.001 | <0.001 |        |         |        |      |
| July 25                                     | 0.017    | 0.2      | 0.264    |         |       |      | July 25                                     | 0.292  | 0.2    | <0.001 |         |        |      |
| Aug                                         | 0.015    | 0.18     | 0.194    | 0.276   |       |      | Aug                                         | 0.097  | 0.011  | <0.001 | 0.919   |        |      |
| Sept                                        | 0.079    | 0.323    | 0.358    | 0.208   | 0.621 |      | Sept                                        | 0.907  | 0.323  | <0.001 | 0.3     | 0.609  |      |
| TRZ                                         | April    | May      | July 7   | July 25 | Aug   | Sept | TRZ                                         | April  | May    | July 7 | July 25 | Aug    | Sept |
| April                                       |          |          |          |         |       |      | April                                       |        |        |        |         |        |      |
| May                                         | 0.05     |          |          |         |       |      | May                                         | 0.558  |        |        |         |        |      |
| July 7                                      | 0.012    | 0.081    |          |         |       |      | July 7                                      | 0.966  | 0.656  |        |         |        |      |
| July 25                                     | 0.012    | 0.338    | 0.332    |         |       |      | July 25                                     | 0.151  | 0.182  | 0.339  |         |        |      |
| Aug                                         | 0.01     | 0.002    | 0.042    | 0.012   |       |      | Aug                                         | 0.025  | 0.01   | 0.755  | 0.231   |        |      |
| Sept                                        | 0.002    | 0.153    | 0.047    | 0.256   | 0.079 |      | Sept                                        | 0.253  | 0.417  | 0.318  | 0.095   | 0.044  |      |
| Clay                                        | April    | May      | July 7   | July 25 | Aug   | Sept | Clay                                        | April  | May    | July 7 | July 25 | Aug    | Sept |
| April                                       |          |          |          |         |       |      | April                                       |        |        |        |         |        |      |
| May                                         | 0.245    |          |          |         |       |      | May                                         | <0.001 |        |        |         |        |      |
| July 7                                      |          |          |          |         |       |      | July 7                                      |        |        |        |         |        |      |
| July 25                                     | 0.237    | 1        |          |         |       |      | July 25                                     | <0.001 | <0.001 |        |         |        |      |
| Aug                                         | 0.231    | 1        |          | 1       |       |      | Aug                                         | <0.001 | <0.001 |        | <0.001  |        |      |
| Sept                                        | 0.249    | 1        |          | 1       | 1     |      | Sept                                        | <0.001 | <0.001 |        | <0.001  | <0.001 |      |
| Aquifer                                     | April    | May      | July 7   | July 25 | Aug   | Sept | Aquifer                                     | April  | May    | July 7 | July 25 | Aug    | Sept |
| April                                       |          |          |          |         |       |      | April                                       |        |        |        |         |        |      |
| May                                         | 0.789    |          |          |         |       |      | May                                         | <0.001 |        |        |         |        |      |
| July 7                                      | 0.217    | 1        |          |         |       |      | July 7                                      | <0.001 | <0.001 |        |         |        |      |
| July 25                                     | 0.803    | 1        | 1        |         |       |      | July 25                                     | <0.001 | <0.001 | <0.001 |         |        |      |
| Aug                                         | 0.113    | 0.201    | 0.179    | 0.414   |       |      | Aug                                         | 0.028  | <0.001 | <0.001 | <0.001  |        |      |
| Sept                                        | 0.046    | 0.58     | 1        | 0.215   | 0.407 |      | Sept                                        | 0.605  | <0.001 | <0.001 | <0.001  | 0.674  |      |
|                                             | p < 0.01 | p < 0.05 | p > 0.05 | no data |       |      |                                             |        |        |        |         |        |      |

**Table S4.** Analysis of molecular variance (AMOVA) and homogeneity of molecular variance (HOMOVA) of microbial communities grouped by Sample Month

| AMOVA (Community Difference) - Sample Month |          |           |          |          |       |       |         | HOMOVA (Community Stability) - Sample Month |         |           |        |          |        |        |         |
|---------------------------------------------|----------|-----------|----------|----------|-------|-------|---------|---------------------------------------------|---------|-----------|--------|----------|--------|--------|---------|
| April                                       | Topsoil  | Evaporite | Sand     | EvapClay | TRZ   | Clay  | Aquifer | April                                       | Topsoil | Evaporite | Sand   | EvapClay | TRZ    | Clay   | Aquifer |
| Topsoil                                     |          |           |          |          |       |       |         | Topsoil                                     |         |           |        |          |        |        |         |
| Evaporite                                   | 0.007    |           |          |          |       |       |         | Evaporite                                   | 0.923   |           |        |          |        |        |         |
| Sand                                        | <0.001   | 0.003     |          |          |       |       |         | Sand                                        | 0.028   | <0.001    |        |          |        |        |         |
| EvapClay                                    | <0.001   | <0.001    | 0.001    |          |       |       |         | EvapClay                                    | 0.24    | <0.001    | 0.031  |          |        |        |         |
| TRZ                                         | 0.002    | 0.001     | 0.001    | <0.001   |       |       |         | TRZ                                         | 0.684   | 0.161     | 0.013  | 0.117    |        |        |         |
| Clay                                        | 0.003    | 0.008     | 0.028    | 0.007    | 0.021 |       |         | Clay                                        | 0.024   | 0.052     | 0.744  | 0.136    | 0.041  |        |         |
| Aquifer                                     | 0.019    | 0.005     | 0.025    | <0.001   | 0.003 | 0.178 |         | Aquifer                                     | 0.031   | 0.097     | 0.002  | 0.042    | 0.118  | 0.03   |         |
| May                                         | Topsoil  | Evaporite | Sand     | EvapClay | TRZ   | Clay  | Aquifer | May                                         | Topsoil | Evaporite | Sand   | EvapClay | TRZ    | Clay   | Aquifer |
| Topsoil                                     |          |           |          |          |       |       |         | Topsoil                                     |         |           |        |          |        |        |         |
| Evaporite                                   | 0.163    |           |          |          |       |       |         | Evaporite                                   | <0.001  |           |        |          |        |        |         |
| Sand                                        | 0.353    | 0.076     |          |          |       |       |         | Sand                                        | <0.001  | 0.013     |        |          |        |        |         |
| EvapClay                                    | 0.363    | 0.065     | 0.331    |          |       |       |         | EvapClay                                    | <0.001  | 0.117     | 0.36   |          |        |        |         |
| TRZ                                         | 0.14     | 0.007     | 0.025    | 0.131    |       |       |         | TRZ                                         | <0.001  | 0.449     | 0.043  | 0.091    |        |        |         |
| Clay                                        | 1        | 0.192     | 0.324    | 0.35     | 0.143 |       |         | Clay                                        | <0.001  | <0.001    | <0.001 | <0.001   | <0.001 |        |         |
| Aquifer                                     | 1        | 0.2       | 0.351    | 0.358    | 0.145 | 1     |         | Aquifer                                     | <0.001  | <0.001    | <0.001 | <0.001   | <0.001 | <0.001 |         |
| July 7                                      | Topsoil  | Evaporite | Sand     | EvapClay | TRZ   | Clay  | Aquifer | July 7                                      | Topsoil | Evaporite | Sand   | EvapClay | TRZ    | Clay   | Aquifer |
| Topsoil                                     |          |           |          |          |       |       |         | Topsoil                                     |         |           |        |          |        |        |         |
| Evaporite                                   | 0.337    |           |          |          |       |       |         | Evaporite                                   | 1       |           |        |          |        |        |         |
| Sand                                        | 0.671    | 0.689     |          |          |       |       |         | Sand                                        | <0.001  | <0.001    |        |          |        |        |         |
| EvapClay                                    | 0.337    | 0.32      | 1        |          |       |       |         | EvapClay                                    | <0.001  | <0.001    | <0.001 |          |        |        |         |
| TRZ                                         | 0.325    | 0.312     | 0.312    | 0.678    |       |       |         | TRZ                                         | 0.325   | 0.351     | <0.001 | <0.001   |        |        |         |
| Clay                                        |          |           |          |          |       |       |         | Clay                                        |         |           |        |          |        |        |         |
| Aquifer                                     | 0.325    | 0.333     | 1        | 1        | 0.348 |       |         | Aquifer                                     | <0.001  | <0.001    | <0.001 | <0.001   | <0.001 |        |         |
| July 25                                     | Topsoil  | Evaporite | Sand     | EvapClay | TRZ   | Clay  | Aquifer | July 25                                     | Topsoil | Evaporite | Sand   | EvapClay | TRZ    | Clay   | Aquifer |
| Topsoil                                     |          |           |          |          |       |       |         | Topsoil                                     |         |           |        |          |        |        |         |
| Evaporite                                   | 0.234    |           |          |          |       |       |         | Evaporite                                   | <0.001  |           |        |          |        |        |         |
| Sand                                        | 1        | 0.189     |          |          |       |       |         | Sand                                        | <0.001  | <0.001    |        |          |        |        |         |
| EvapClay                                    | 0.025    | 0.32      | 0.276    |          |       |       |         | EvapClay                                    | <0.001  | 0.649     | <0.001 |          |        |        |         |
| TRZ                                         | 0.335    | 0.055     | 0.341    | 0.19     |       |       |         | TRZ                                         | <0.001  | 0.061     | <0.001 | 0.331    |        |        |         |
| Clay                                        | 1        | 0.236     | 1        | 0.47     | 0.354 |       |         | Clay                                        | <0.001  | <0.001    | <0.001 | <0.001   | <0.001 |        |         |
| Aquifer                                     | 1        | 0.176     | 1        | 0.515    | 0.337 | 1     |         | Aquifer                                     | <0.001  | <0.001    | <0.001 | <0.001   | <0.001 | <0.001 |         |
| Aug                                         | Topsoil  | Evaporite | Sand     | EvapClay | TRZ   | Clay  | Aquifer | Aug                                         | Topsoil | Evaporite | Sand   | EvapClay | TRZ    | Clay   | Aquifer |
| Topsoil                                     |          |           |          |          |       |       |         | Topsoil                                     |         |           |        |          |        |        |         |
| Evaporite                                   | 0.045    |           |          |          |       |       |         | Evaporite                                   | <0.001  |           |        |          |        |        |         |
| Sand                                        | 0.244    | 0.01      |          |          |       |       |         | Sand                                        | <0.001  | 0.102     |        |          |        |        |         |
| EvapClay                                    | 0.176    | 0.016     | 0.043    |          |       |       |         | EvapClay                                    | <0.001  | 0.572     | 0.025  |          |        |        |         |
| TRZ                                         | 0.03     | 0.002     | 0.005    | 0.01     |       |       |         | TRZ                                         | <0.001  | 0.173     | 0.229  | 0.078    |        |        |         |
| Clay                                        | 1        | 0.039     | 0.246    | 0.201    | 0.027 |       |         | Clay                                        | <0.001  | <0.001    | <0.001 | <0.001   | <0.001 |        |         |
| Aquifer                                     | 0.202    | 0.022     | 0.032    | 0.023    | 0.004 | 0.197 |         | Aquifer                                     | <0.001  | 0.024     | 0.025  | 0.023    | 0.023  | <0.001 |         |
| Sept                                        | Topsoil  | Evaporite | Sand     | EvapClay | TRZ   | Clay  | Aquifer | Sept                                        | Topsoil | Evaporite | Sand   | EvapClay | TRZ    | Clay   | Aquifer |
| Topsoil                                     |          |           |          |          |       |       |         | Topsoil                                     |         |           |        |          |        |        |         |
| Evaporite                                   | 0.799    |           |          |          |       |       |         | Evaporite                                   | 0.582   |           |        |          |        |        |         |
| Sand                                        | 0.333    | 0.183     |          |          |       |       |         | Sand                                        | 0.329   | 0.107     |        |          |        |        |         |
| EvapClay                                    | 0.33     | 0.105     | 0.332    |          |       |       |         | EvapClay                                    | 0.33    | 0.182     | 0.332  |          |        |        |         |
| TRZ                                         | 0.023    | 0.004     | 0.023    | 0.046    |       |       |         | TRZ                                         | 0.77    | 0.558     | 0.107  | 0.32     |        |        |         |
| Clay                                        | 0.323    | 0.238     | 0.347    | 0.334    | 0.109 |       |         | Clay                                        | <0.001  | <0.001    | <0.001 | <0.001   | <0.001 |        |         |
| Aquifer                                     | 0.066    | 0.023     | 0.064    | 0.073    | 0.003 | 0.806 |         | Aquifer                                     | 0.923   | 0.036     | 0.132  | 0.184    | 0.225  | <0.001 |         |
|                                             | p < 0.01 | p < 0.05  | p > 0.05 | no data  |       |       |         |                                             |         |           |        |          |        |        |         |

**Table S5.** Analysis of molecular variance (AMOVA) and homogeneity of molecular variance (HOMOVA) of microbial communities in July 7 versus July 25 samples – a period of rapid change in soil moisture at the site, particularly in the upper layers (post-flood into onset of summer drought).

|           | <b>AMOVA: July 7 (rows) versus July 25 (columns)</b>  |           |          |          |        |        |         |
|-----------|-------------------------------------------------------|-----------|----------|----------|--------|--------|---------|
|           | Topsoil                                               | Evaporite | Sand     | EvapClay | TRZ    | Clay   | Aquifer |
| Topsoil   | 1                                                     | 0.161     | 1        | 0.103    | 0.308  | 0.336  | 0.339   |
| Evaporite | 0.326                                                 | 0.532     | 0.363    | 0.203    | 0.335  | 0.315  | 0.34    |
| Sand      | 1                                                     | 0.209     | 1        | 0.498    | 0.343  | 1      | 1       |
| EvapClay  | 1                                                     | 0.201     | 1        | 0.264    | 0.319  | 1      | 1       |
| TRZ       | 0.323                                                 | 0.062     | 0.293    | 0.179    | 0.332  | 0.342  | 0.346   |
| Clay      |                                                       |           |          |          |        |        |         |
| Aquifer   | 1                                                     | 0.197     | 1        | 0.215    | 0.338  | 1      | 1       |
|           | <b>HOMOVA: July 7 (rows) versus July 25 (columns)</b> |           |          |          |        |        |         |
|           | Topsoil                                               | Evaporite | Sand     | EvapClay | TRZ    | Clay   | Aquifer |
| Topsoil   | <0.001                                                | 0.661     | <0.001   | 0.684    | 0.343  | <0.001 | <0.001  |
| Evaporite | <0.001                                                | 0.673     | <0.001   | 0.591    | 0.33   | <0.001 | <0.001  |
| Sand      | <0.001                                                | <0.001    | <0.001   | <0.001   | <0.001 | <0.001 | <0.001  |
| EvapClay  | <0.001                                                | <0.001    | <0.001   | <0.001   | <0.001 | <0.001 | <0.001  |
| TRZ       | <0.001                                                | 0.411     | <0.001   | 0.789    | 0.339  | <0.001 | <0.001  |
| Clay      |                                                       |           |          |          |        |        |         |
| Aquifer   | <0.001                                                | <0.001    | <0.001   | <0.001   | <0.001 | <0.001 | <0.001  |
|           | p < 0.01                                              | p < 0.05  | p > 0.05 | no data  |        |        |         |

**Table S6.** Linear discriminant analysis (LDA) effect size (LEfSe) testing of significantly different OTUs between samples categorized by soil type or sample month. A significant p-value (<0.05) indicates an OTU with elevated abundance in the specified sample category. NS = not significant. Results for the Top 30 OTUs are shown for brevity; for the taxonomic information of each OTU, see Table S2.

| OTU      | Soil Layer | LDA   | p-value | Month  | LDA   | p-value |
|----------|------------|-------|---------|--------|-------|---------|
| Otu00001 | TRZ        | 4.099 | <0.0001 | -      | NS    | NS      |
| Otu00002 | TRZ        | 4.161 | <0.0001 | -      | NS    | NS      |
| Otu00003 | aquifer    | 4.340 | <0.0001 | -      | NS    | NS      |
| Otu00004 | aquifer    | 4.135 | <0.0001 | -      | NS    | NS      |
| Otu00005 | aquifer    | 3.836 | <0.0001 | -      | NS    | NS      |
| Otu00006 | aquifer    | 3.614 | 0.022   | -      | NS    | NS      |
| Otu00007 | TRZ        | 3.727 | <0.0001 | -      | NS    | NS      |
| Otu00008 | evaporite  | 4.145 | <0.0001 | April  | 3.767 | 0.005   |
| Otu00009 | sand       | 3.750 | <0.0001 | -      | NS    | NS      |
| Otu00010 | clay       | 3.766 | <0.0001 | August | 3.659 | 0.042   |
| Otu00011 | evapclay   | 3.515 | <0.0001 | April  | 3.397 | 0.014   |
| Otu00012 | clay       | 3.717 | <0.0001 | -      | NS    | NS      |
| Otu00013 | evapclay   | 3.725 | <0.0001 | -      | NS    | NS      |
| Otu00014 | clay       | 3.712 | <0.0001 | -      | NS    | NS      |
| Otu00015 | evaporite  | 3.621 | <0.0001 | -      | NS    | NS      |
| Otu00016 | topsoil    | 3.923 | 0       | -      | NS    | NS      |
| Otu00017 | topsoil    | 3.704 | <0.0001 | -      | NS    | NS      |
| Otu00018 | evaporite  | 3.968 | <0.0001 | -      | NS    | NS      |
| Otu00019 | evapclay   | 3.600 | <0.0001 | -      | NS    | NS      |
| Otu00020 | evaporite  | 3.579 | <0.0001 | April  | 3.376 | 0.028   |
| Otu00021 | evaporite  | 4.029 | <0.0001 | -      | NS    | NS      |
| Otu00022 | topsoil    | 3.227 | <0.0001 | -      | NS    | NS      |
| Otu00023 | clay       | 3.751 | <0.0001 | -      | NS    | NS      |
| Otu00024 | sand       | 3.768 | <0.0001 | -      | NS    | NS      |
| Otu00025 | clay       | 2.379 | <0.0001 | -      | NS    | NS      |
| Otu00026 | sand       | 3.379 | <0.0001 | -      | NS    | NS      |
| Otu00027 | evaporite  | 3.739 | <0.0001 | -      | NS    | NS      |
| Otu00028 | clay       | 3.191 | <0.0001 | -      | NS    | NS      |
| Otu00029 | evaporite  | 3.412 | <0.0001 | -      | NS    | NS      |
| Otu00030 | sand       | 3.538 | <0.0001 | May    | 3.740 | 0.001   |

## 2.2 Supplementary Figures

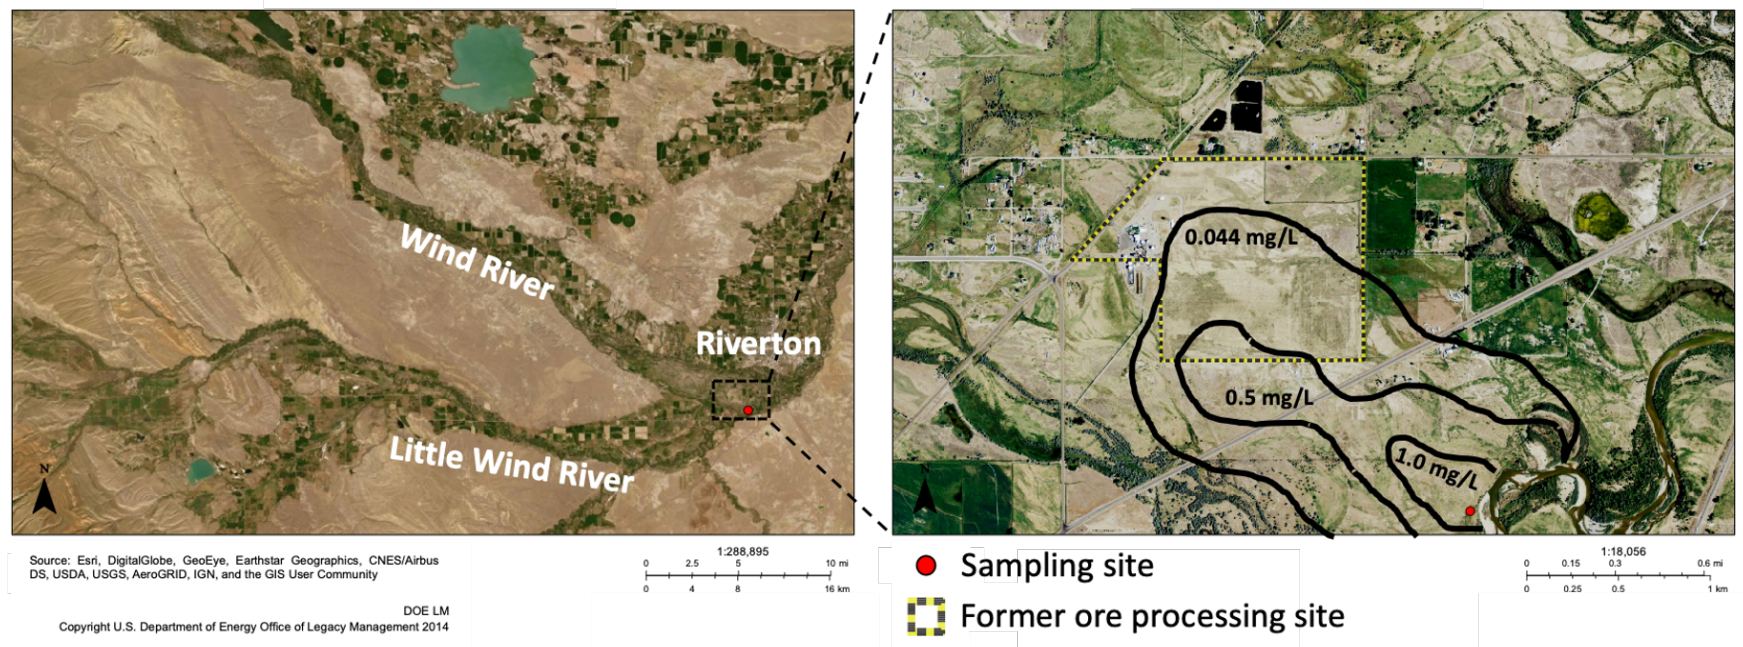

**Figure S1.** Riverton, WY, sample site (42° 59' 19.1" N, 108° 23' 58.6" W) in the Wind River-Little Wind River floodplain, including the former U ore processing site (inset) and resulting groundwater plume of U (indicated by black contour lines, with U concentration in mg/L).

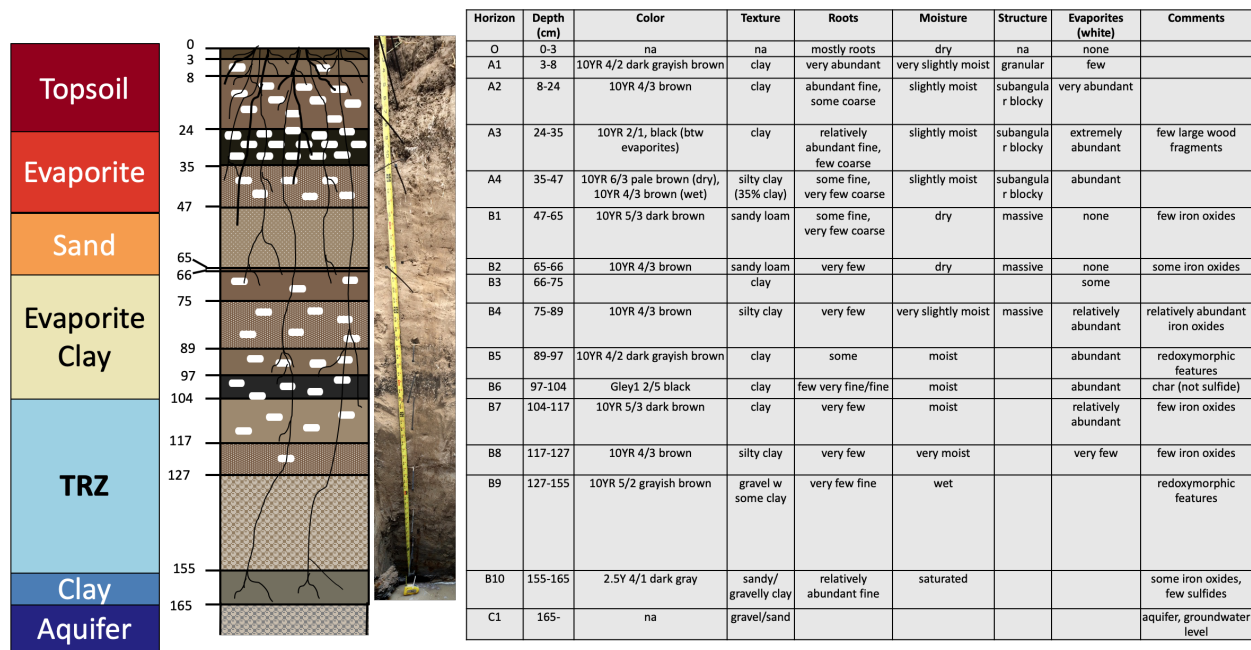

**Figure S2.** Soil profile at the Riverton, WY, site determined in 2016 (center) with soil characteristics (right). Sediment layers categorized during the 2017 season (left) are included for comparison; depths for these layers from soil cores collected for this study were as follows: Topsoil (~0-30 cm), Evaporite (~30-55 cm), Sand (~55-75 cm), Evaporite-Clay (~75-100 cm), TRZ (~100-140 cm), Clay (~140-150 cm), and Aquifer (~150-170 cm).

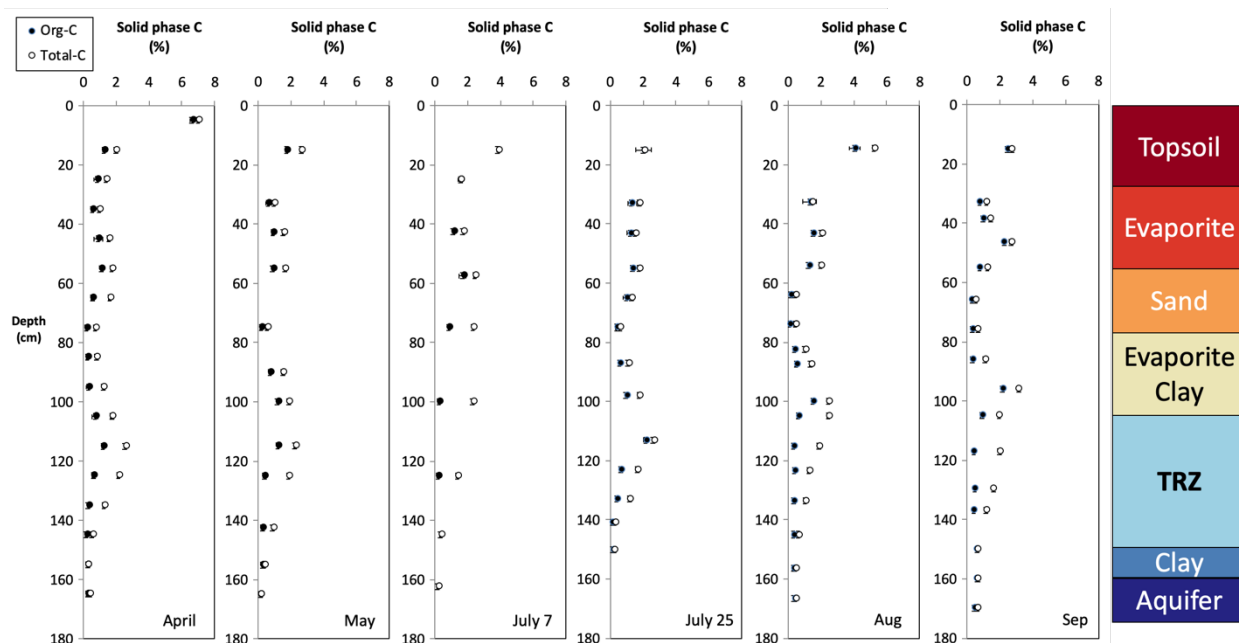

**Figure S3.** Depth profiles of total C (open circles) and total organic C (filled circles) from sediment collected during the 2017 season at the Riverton, WY, site. Error bars denote 1 standard deviation.



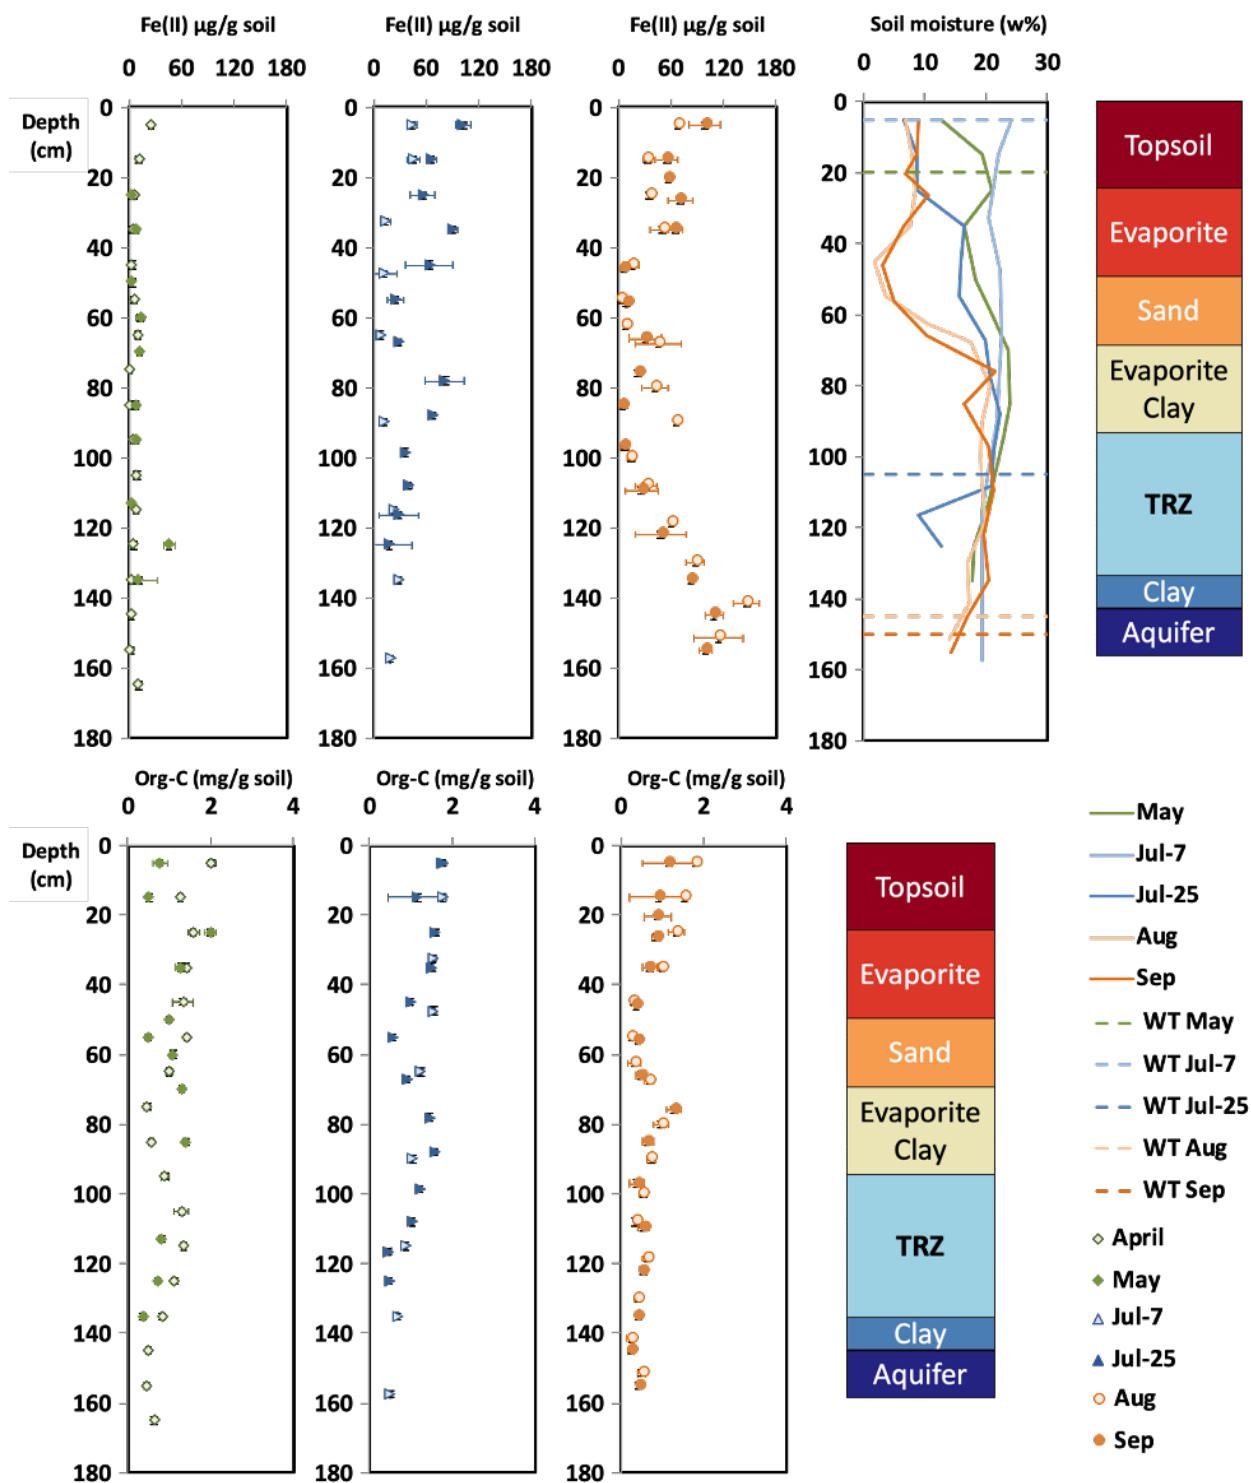

**Figure S4.** Depth profiles of HCl-extractable Fe(II), soil moisture, and water extractable organic C during the 2017 season at the Riverton, WY, site. Error bars denote 1 standard deviation. WT = water table depth for each month (plotted with soil moisture).



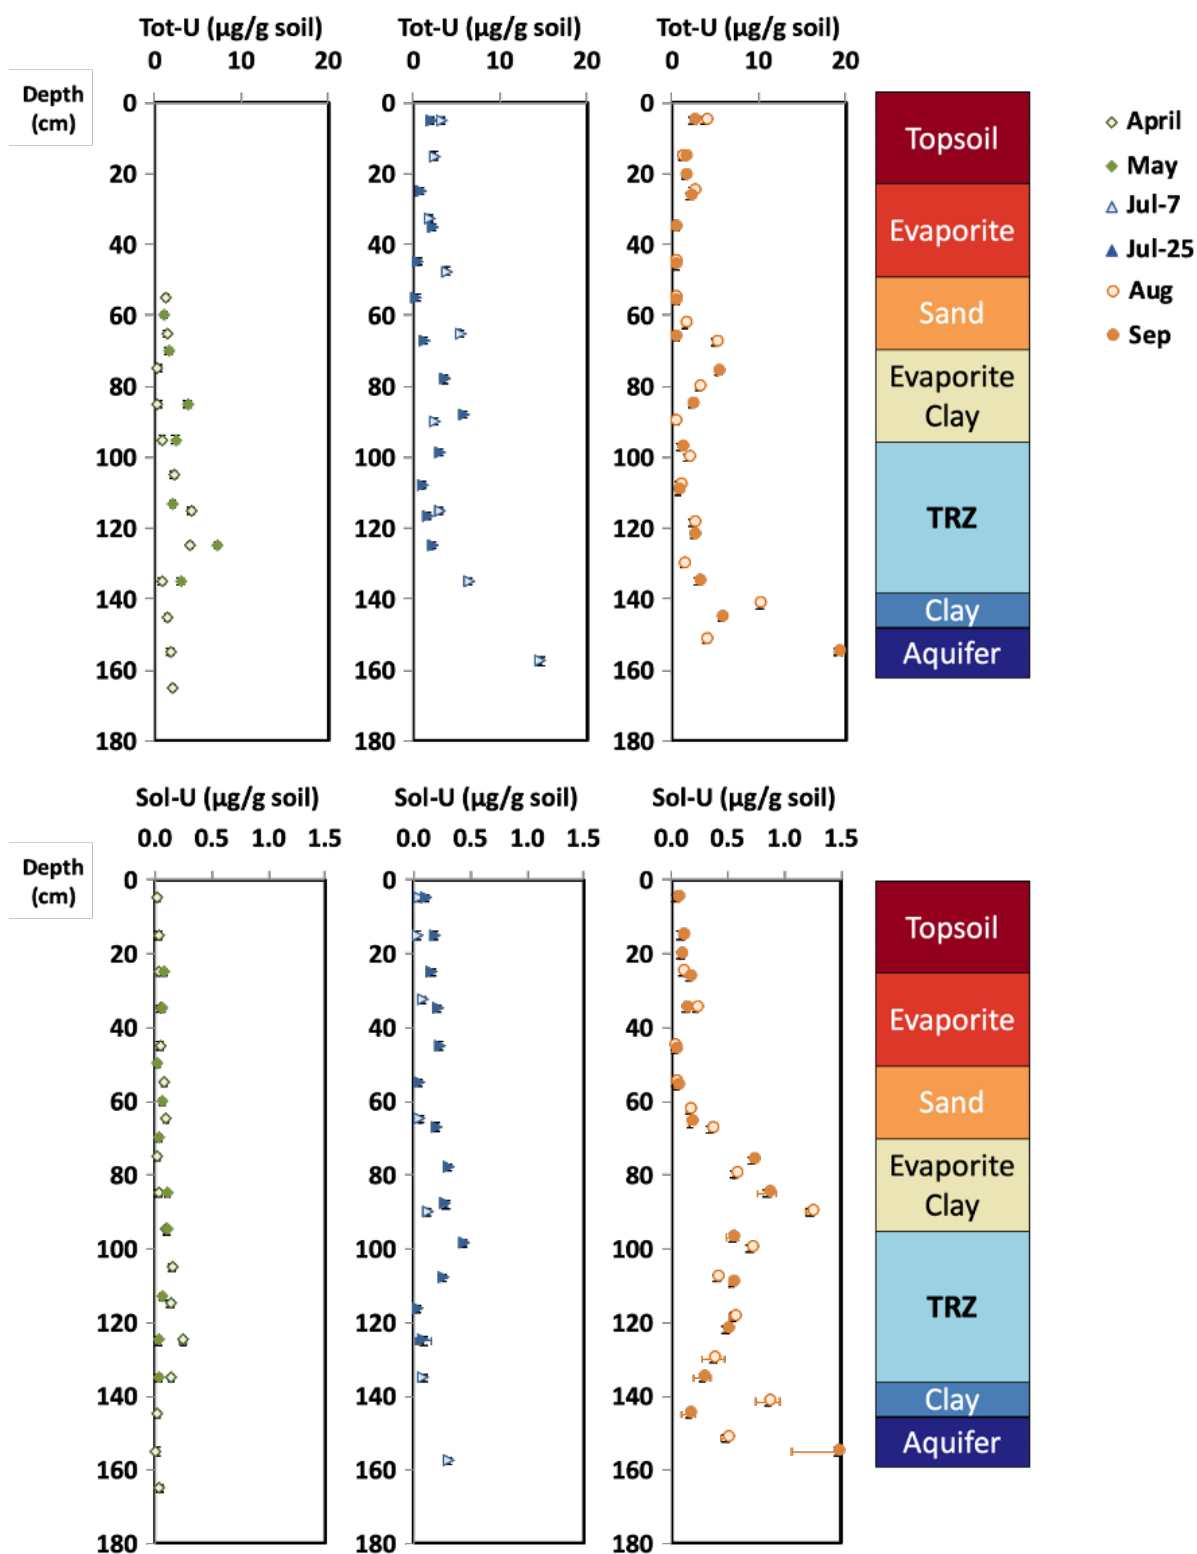

**Figure S5.** Depth profiles of total U (top) and water extractable U (bottom) from sediment collected during 2017 at Riverton. Error bars denote 1 standard deviation.

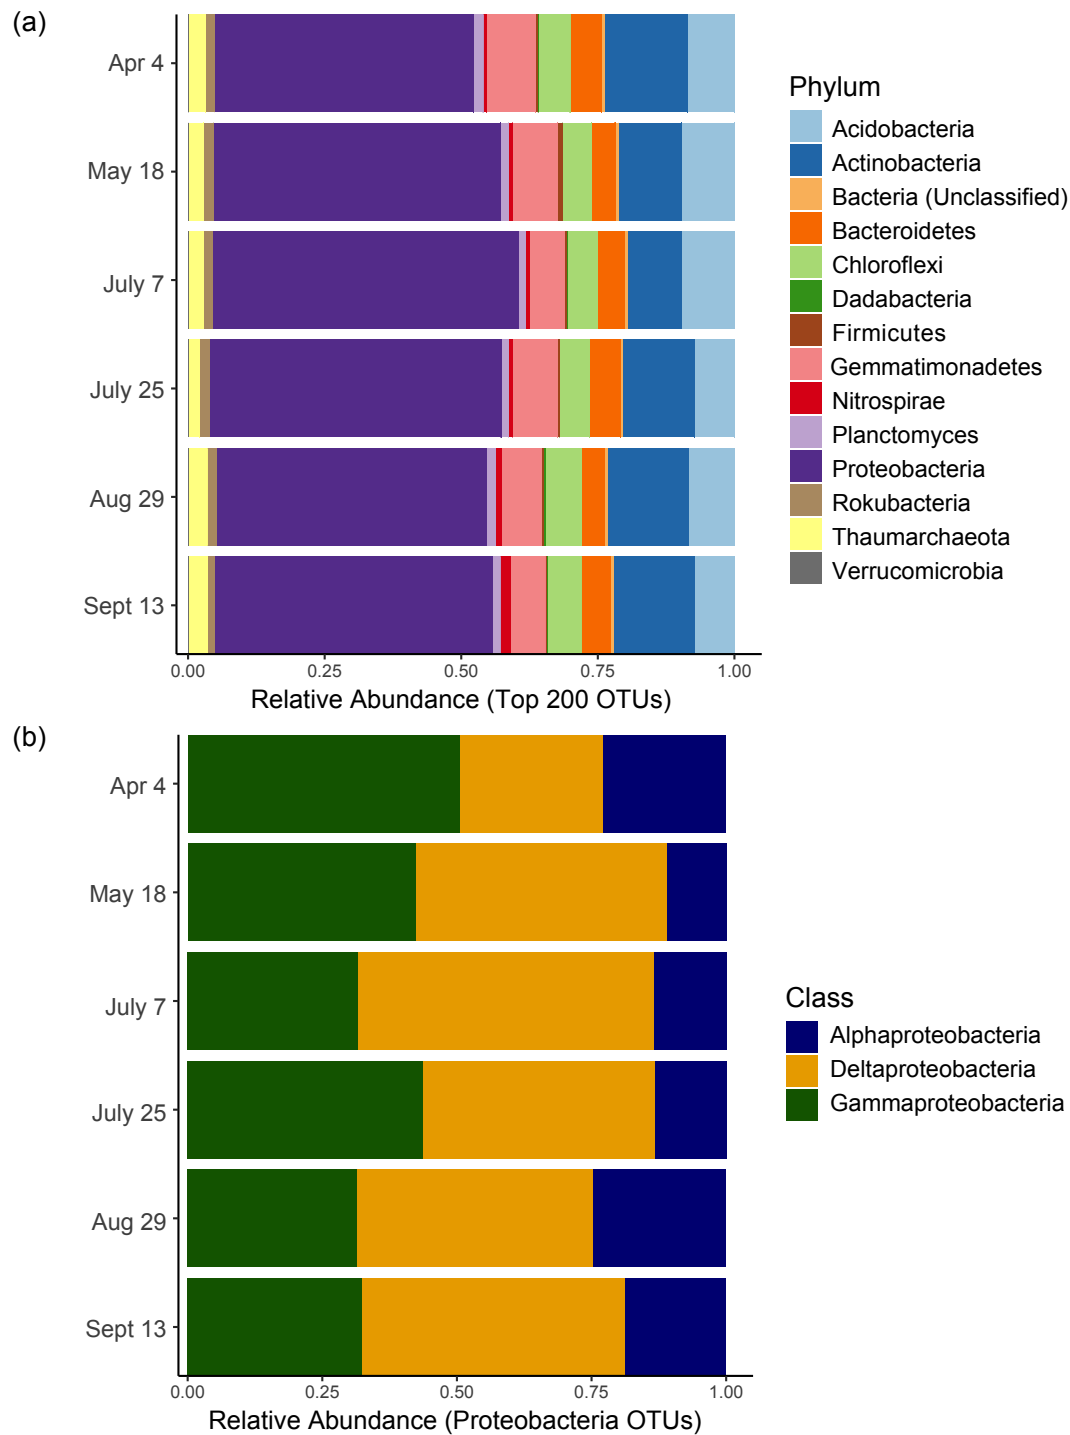

**Figure S6a-b.** Relative abundance of (a) phyla and (b) classes within Proteobacteria, grouped by sample time.

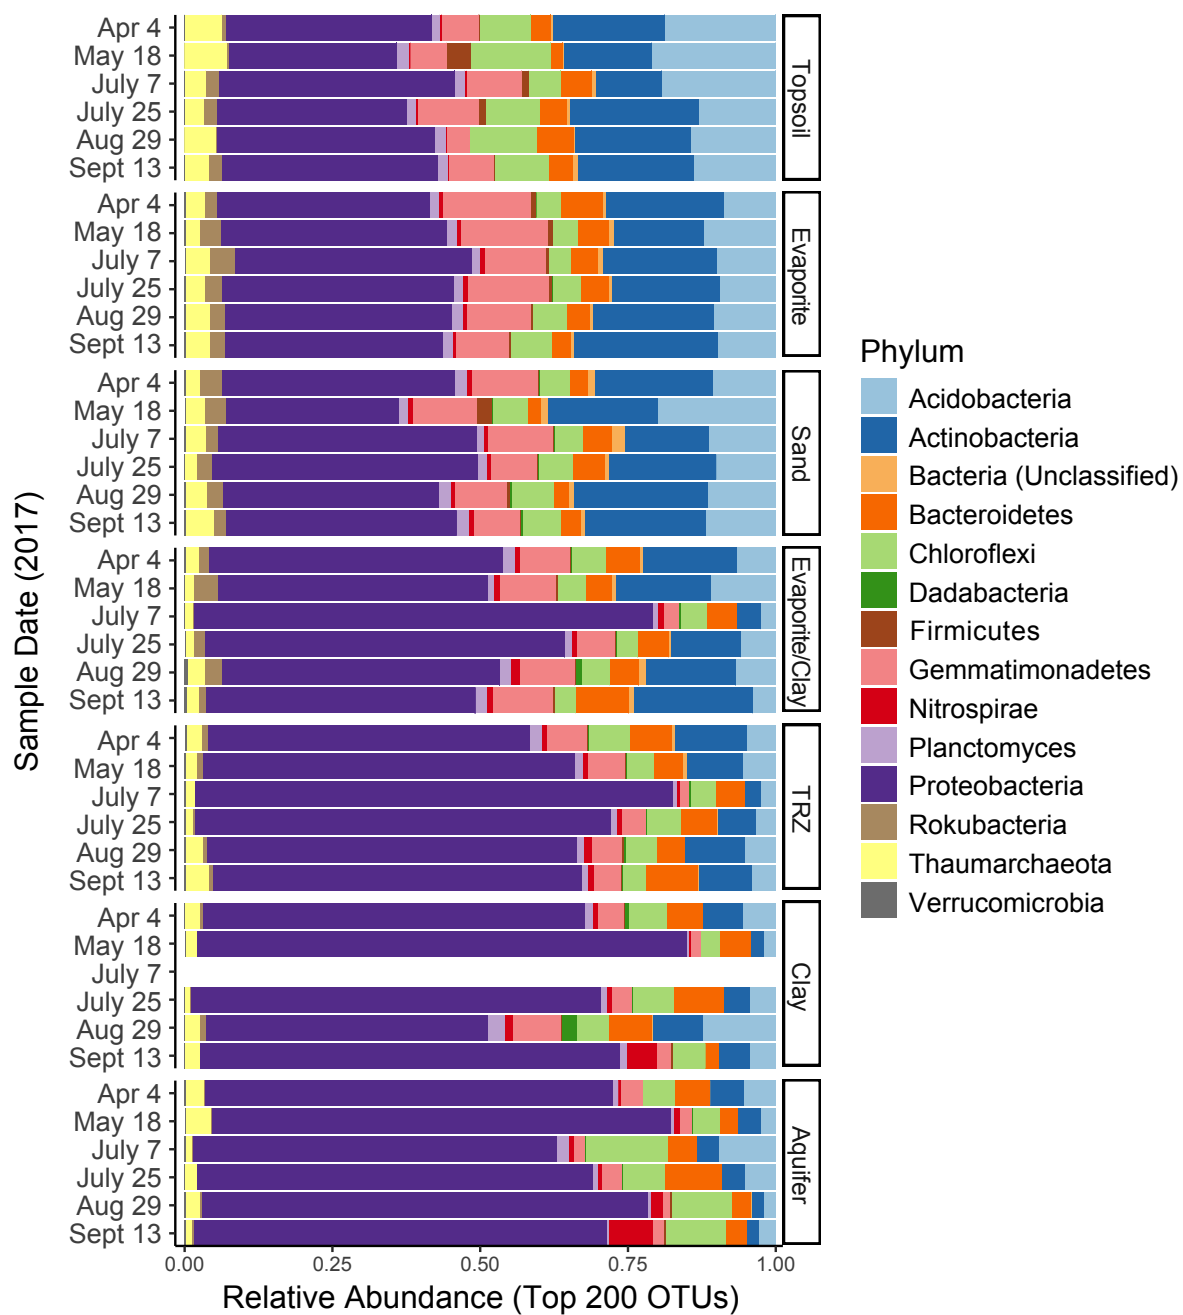

**Figure S7.** Relative abundance of Top 200 most abundant taxa (OTUs) in our dataset, classified at the Phylum level and grouped based on soil category (right). Within each soil layer, we have divided samples based on sample time (left).

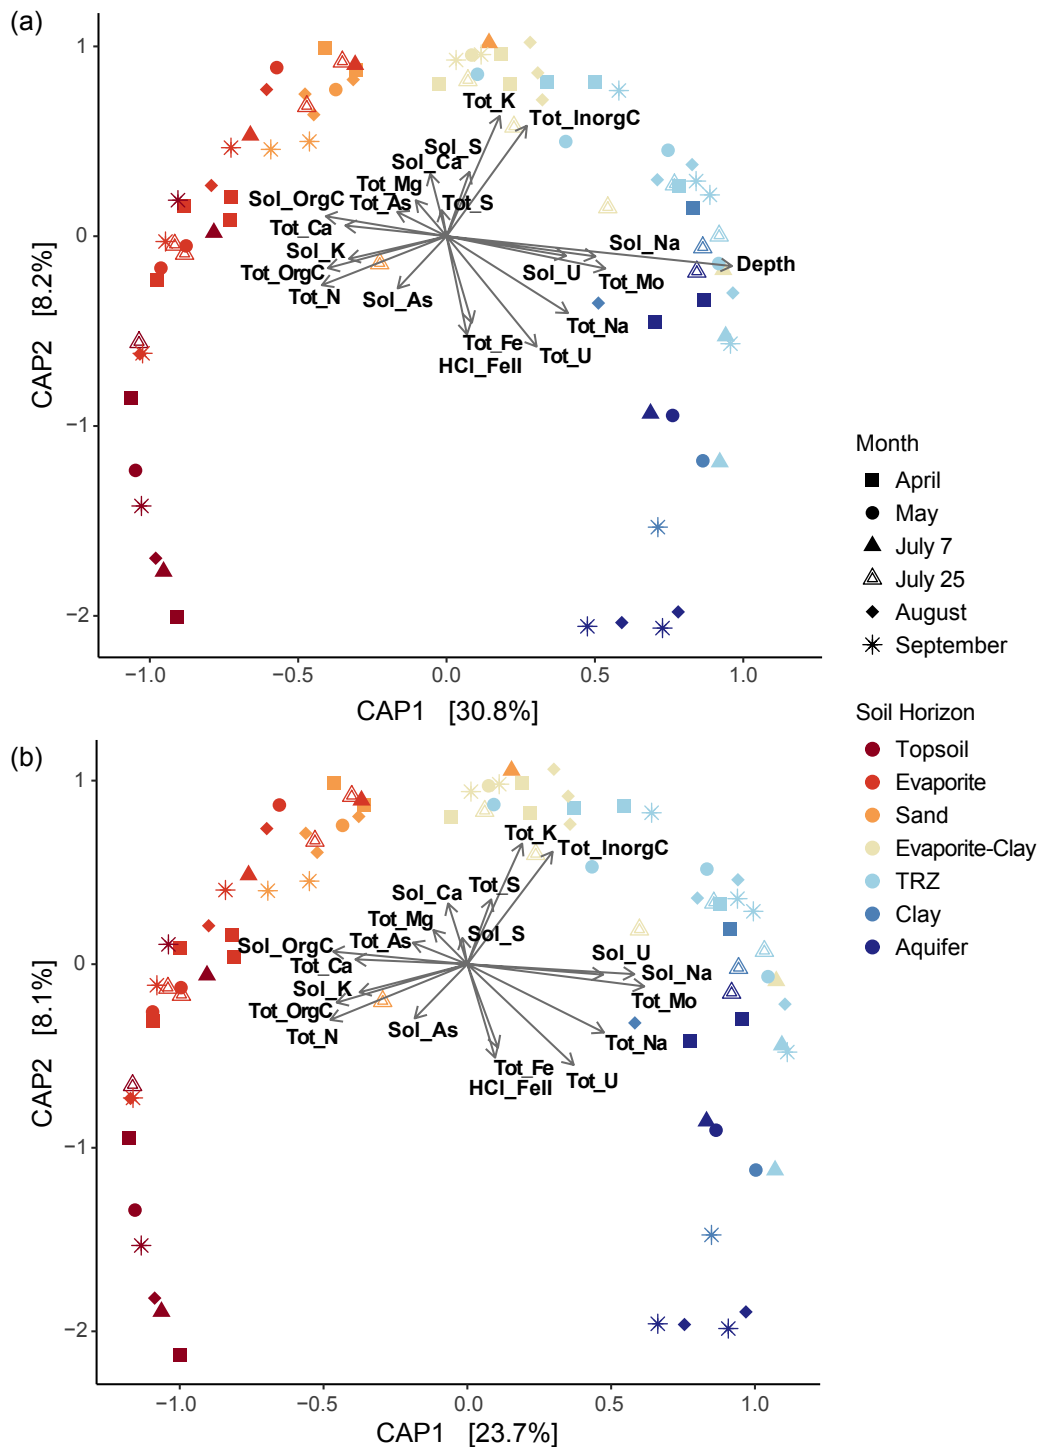

**Figure S8a-b.** Constrained Analysis of Principal Coordinates (CAP) showing sample distributions based on microbial data with environmental data overlain as vectors, using the **(a)** full dataset with all variables included or **(b)** full dataset with sample depth excluded. Tot = total, Sol = soluble; orgC = organic carbon, InorgC = inorganic (carbonate) carbon; HCl\_FeII = acid-extracted Fe(II).

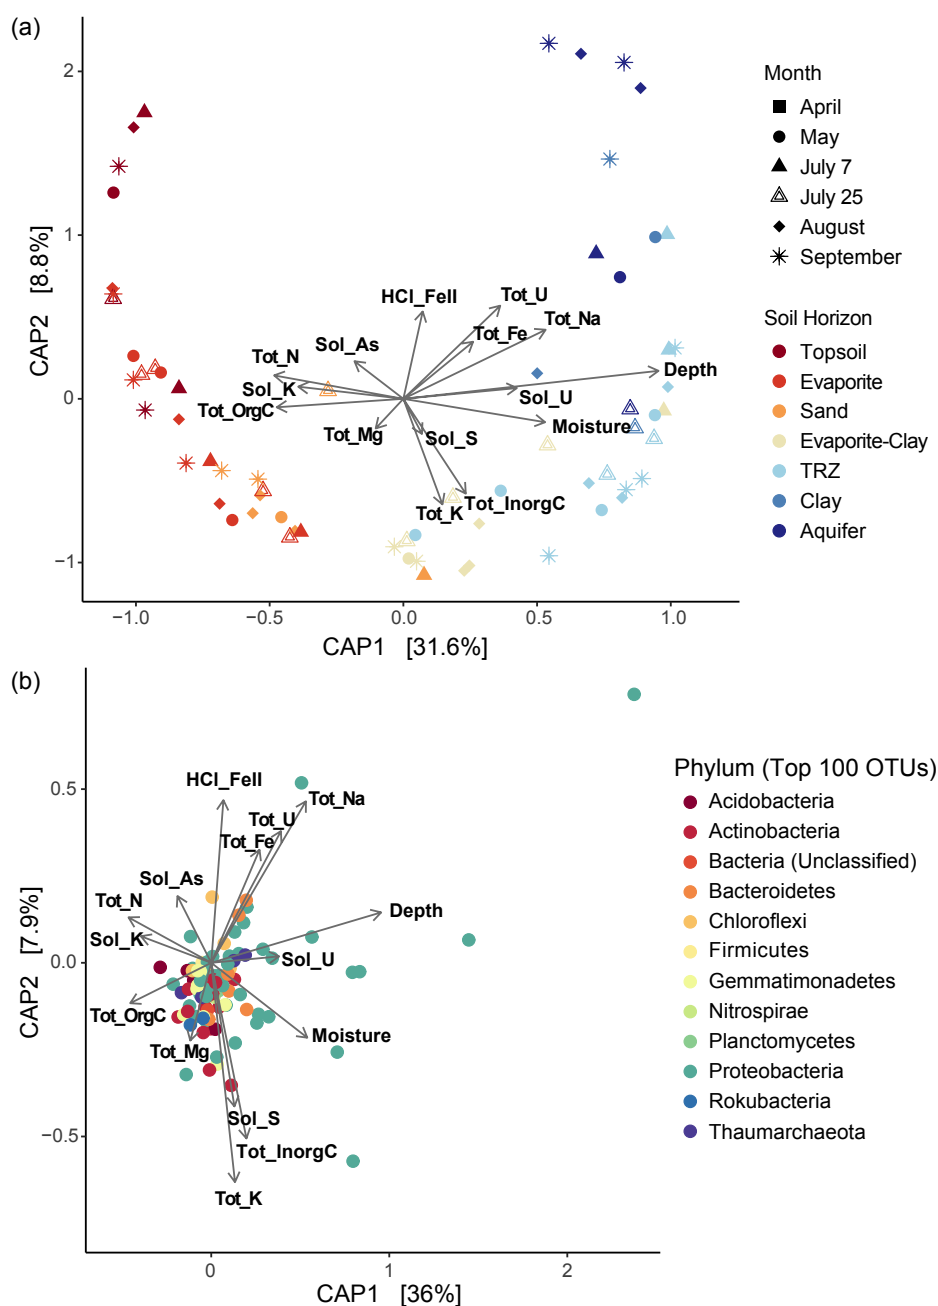

**Figure S9a-b.** Constrained Analysis of Principal Coordinates (CAP) showing sample distributions based on both microbial and environmental data using a reduced dataset (excluding April samples) to include soil moisture data. Plots generated to display **(a)** overall differences in diversity among samples or **(b)** differences between individual taxa (OTUs) from all samples. Environmental data used in CAP analysis is overlain on each plot, displayed as vectors. Tot = total, Sol = soluble; orgC = organic carbon, inorgC = inorganic (carbonate) carbon; HCl\_FeII = acid-extracted Fe(II). Covarying environmental measurements were removed for CAP analysis: total C (represented by total organic and inorganic C); soluble Mg and Ca, total As (covaries with total Mg); total Ca and soluble organic C (total organic C); soluble Na, total and soluble Mo (depth and soluble U). Total S was also removed due to low significance.

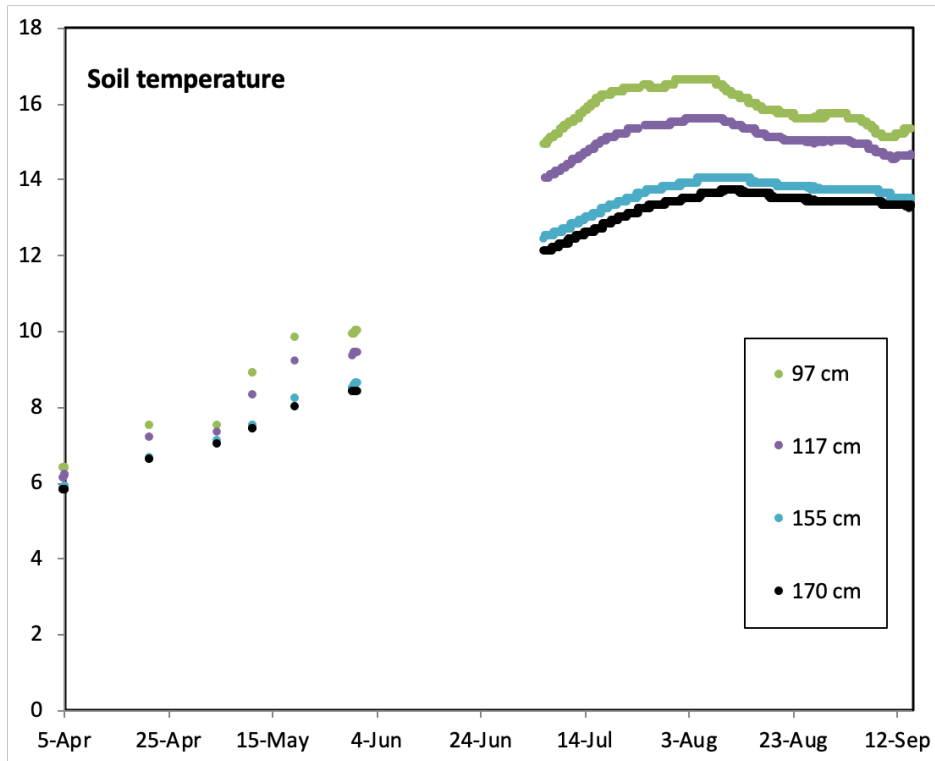

**Figure S10.** Soil temperature recorded by Acclima True Time Domain Reflectometer (TDR-15L) sensors installed the previous season (2016) in a location <5 m from the current study sampling area and in soil layers corresponding to Evaporite-Clay (green, 97 cm), TRZ (purple, 117 cm), Clay (blue, 155 cm), and Aquifer (black, 170 cm).
