# Supplementary material
Source: Frontiers journal article supplement (https://www.frontiersin.org/articles/554046)
Supplement: Table_1.XLSX [file Table_1.XLSX]

## Sheet: Table S1
Sample ID	Month	Soil Horizon	Date	Corr_depth	Depth_mid	Depth_top	Tot_C	Tot_OrgC	Tot_CO3-C	Tot_N	Tot_Na	Tot_Mg	Tot_S	Tot_Fe	Tot_K	Tot_Ca	Tot_As	Tot_Mo	Tot_U	Sol_OrgC	Sol_Na	Sol_Mg	Sol_S	Sol_K	Sol_Ca	Sol_As	Sol_Mo	Sol_U	HCl_FeII	Moisture
RVT2_082917_105_112	August	TRZ	2017-08-29	120	115	105	1.24	0.36	0.88	0.04	7.5	18.16	1.374	17.14	33.49	21.2	3.7	5.1	0.8	0.35	0.96	0.14	0.74	0.02	0.32	0.02	0.2	0.4	31.6	19.3
RVT2_082917_148_155	August	aquifer	2017-08-29	163	167	148	0.41	0.34	0.07	0.04	18.68	17.14	2.121	20.92	12.5	17.47	2.8	5.3	3.9	0.51	1.51	0.21	1.47	0.04	0.56	0.02	0.32	0.48	113.9	14
RVT2_082917_20_30	August	evaporite	2017-08-29	38	43	20	2	1.51	0.49	0.16	4.28	17.62	5.546	17.77	33.66	26.17	6.6	4.5	2.4	1.34	0.38	0.27	0.84	0.09	0.76	0.04	0.04	0.1	35.6	8.4
RVT2_082917_30_38	August	evaporite	2017-08-29	50	54	30	1.94	1.23	0.71	0.11	11.98	7.81	0.6169	16.05	17.64	9.677	0.8	3.3	ND	1	0.41	0.56	2.98	0.09	3.13	0.02	0.06	0.22	50.5	7.6
RVT2_082917_40_48	August	sand	2017-08-29	60	64	40	0.43	0.15	0.28	0.02	9.74	8.09	0.3311	14.56	18.39	10.48	1.7	3.8	ND	0.19	0.08	0.07	0.11	0.02	0.27	0.02	0.02	0.02	15.2	1.8
RVT2_082917_48_60	August	sand	2017-08-29	68	74	48	0.41	0.07	0.34	0.02	7.43	14.7	1.287	16.39	30.29	16.66	2.8	5.6	ND	0.2	0.09	0.08	0.08	0.01	0.27	0.01	0.08	0.04	2.5	3.5
RVT2_082917_60_65	August	sand	2017-08-29	80	83	60	0.98	0.35	0.63	0.04	5.49	17.82	4.413	17.72	37.5	22.67	3.9	4.7	1.5	0.33	0.28	0.14	0.33	0.02	0.36	0.01	0.1	0.15	8.2	10.7
RVT2_082917_65_70	August	evapclay	2017-08-29	85	88	65	1.35	0.49	0.86	0.05	4.24	18.86	3.99	17.6	35.56	31.05	2.3	4	5	0.68	0.64	0.52	2.82	0.05	2.69	0.01	0.09	0.34	45.5	17.5
RVT2_082917_9_20	August	evaporite	2017-08-29	27	33	9	1.42	1.31	0.11	0.1	4.88	19.93	2.093	18.36	21.31	34.81	4	3.4	1.1	1.53	0.36	0.15	0.43	0.11	0.44	0.07	0.04	0.08	32.9	8
RVT2_082917_9	August	topsoil	2017-08-29	10	15	0	5.22	4.04	1.18	0.43	3.66	16.78	1.706	17.54	19.56	30.29	2.5	2.3	3.8	1.21	0.47	0.11	0.45	0.18	0.41	0.07	0.03	0.04	67.6	6.9
RVT2_Jul25_15	July_2	evaporite	2017-07-25	28	33	10	1.75	1.27	0.48	0.12	2.09	11.5	2.623	6.547	9.389	22.54	1.5	2.1	ND	0.35	1.04	0.79	3.97	0.18	3.3	0.03	0.06	0.19	65.2	8.8
RVT2_Jul25_25	July_2	evaporite	2017-07-25	38	43	20	1.49	1.19	0.3	0.11	4.21	19.84	4.178	17.73	23.12	35	4.1	3.5	0.9	0.95	1.21	0.57	2.71	0.16	1.93	0.05	0.06	0.16	56.1	8.7
RVT2_Jul25_35	July_2	evaporite	2017-07-25	50	55	30	1.74	1.34	0.4	0.13	1.74	15.98	11.28	15.88	27.62	28.41	3.3	4.4	2.3	0.63	1.72	0.93	5.62	0.14	4.68	0.03	0.06	0.21	90.3	16.4
RVT2_Jul25_45	July_2	evaporite	2017-07-25	60	65	40	1.28	0.95	0.33	0.06	4.58	15.42	4.064	15.22	31.27	19.21	2.7	5.3	0.6	0.57	1	0.46	2.65	0.08	2.27	0.02	0.06	0.22	63.4	15.8
RVT2_Jul25_55	July_2	sand	2017-07-25	70	75	0	2	2.02	0	0.15	3.05	16.02	2.726	14.76	19.56	28.35	3.9	3.1	2	0.55	0.6	0.52	2.32	0.27	2.03	0.07	0.05	0.11	102.2	6.7
RVT2_Jul25_5	July_2	topsoil	2017-07-25	10	15	50	0.57	0.36	0.22	0.03	8.26	12.05	1.886	15.99	22.19	12.24	1.2	3.8	ND	0.31	0.39	0.17	0.67	0.03	0.64	0.01	0.04	0.05	24.7	15.5
RVT2_Jul25_67	July_2	evapclay	2017-07-25	80	87	60	1.06	0.54	0.52	0.05	6.62	15.71	2.298	15.91	26.62	19.48	3.4	5.5	1.2	0.29	0.98	0.33	1.73	0.05	1.28	0.01	0.13	0.2	28.2	19.8
RVT2_Jul25_78	July_2	evapclay	2017-07-25	94	98	74	1.74	0.93	0.8	0.1	4.74	18.7	3.837	17.49	32.49	29.53	4	7	3.7	0.77	1.52	0.6	3.13	0.07	2.19	0.03	0.16	0.31	81.7	20.8
RVT2_Sep_110	September	TRZ	2017-09-13	124	130	104	1.61	0.45	1.16	0.05	7.95	18.87	1.434	17.15	43.79	22.85	4.7	4.8	0.7	0.55	1.26	0.09	0.72	0.02	0.16	0.03	0.22	0.53	26.3	21.3
RVT2_Sep_135	September	clay	2017-09-13	145	150	130	0.64	0.59	0.05	0.03	10.46	16.05	5.436	16.93	19.06	19.84	2.3	4.4	3	0.43	2.33	0.37	3.39	0.04	2.03	0.01	0.12	0.27	82.5	20.4
RVT2_Sep_14	September	topsoil	2017-09-13	28	33	10	1.19	0.75	0.44	0.08	2.69	17.27	3.663	17.07	25.89	34.25	4.7	2.9	1.4	0.91	0.29	0.37	1.78	0.11	1.9	0.02	0.06	0.08	55.2	8.8
RVT2_Sep_21	September	evaporite	2017-09-13	36	39	18	1.43	0.98	0.45	0.1	3.33	19.16	4.826	18.24	26.28	33.64	4.8	4.7	1.5	0.88	0.29	0.46	2.52	0.11	2.73	0.02	0.04	0.08	56.1	6.9
RVT2_Sep_27	September	evaporite	2017-09-13	43	47	23	2.68	2.26	0.43	0.19	0.05	17.46	11.52	17.01	33.43	33.6	4.9	4.5	2	0.57	0.45	0.62	3.87	0.12	4.21	0.03	0.05	0.15	70.1	10.5
RVT2_Sep_35	September	evaporite	2017-09-13	50	55	30	1.23	0.76	0.46	0.07	2.03	15.42	10.95	16.32	38.37	23.72	5.4	4.2	ND	0.7	0.35	0.48	3.84	0.07	4.5	0.02	0.05	0.13	64.9	6.6
RVT2_Sep_46	September	sand	2017-09-13	60	66	40	0.53	0.31	0.22	0.03	8.41	11.55	1.561	15.86	22.47	13.3	1.6	3.7	ND	0.37	0.12	0.11	0.45	0.03	0.65	0.01	0.05	0.03	6.2	3.1
RVT2_Sep_56	September	sand	2017-09-13	72	76	0	2.73	2.46	0.27	0.22	4.03	17.69	1.18	17.53	21.8	32.76	3.4	4.6	2.4	1.16	0.35	0.1	0.34	0.16	0.41	0.1	0.03	0.04	98.6	9
RVT2_Sep_5	September	topsoil	2017-09-13	10	15	52	0.67	0.32	0.35	0.03	9.42	12.01	1.686	15.55	26.92	14.06	1.5	4.1	ND	0.41	0.17	0.21	1.25	0.05	1.52	0.01	0.07	0.04	9.1	4.9
RVT2_Sep_66	September	evapclay	2017-09-13	80	86	60	1.09	0.32	0.77	0.05	6.33	17.58	1.408	17.02	32.01	19.72	3.3	3.3	ND	0.49	0.37	0.34	1.35	0.04	1.29	0.01	0.07	0.17	30.7	10.4
RVT2_Sep_76	September	evapclay	2017-09-13	92	96	72	3.14	2.15	1	0.16	3.2	18.02	2.341	16.59	41.55	29.96	2.4	3.4	5.3	1.29	1.16	0.46	1.82	0.06	1.09	0.03	0.11	0.71	22.5	21.4
RVTP2_040417_105	April	evapclay	2017-04-05	100	105	100	1.74	0.71	1.04	0.12	5.81	15.99	3.658	15.22	30.71	22.54	3.3	5.4	2.2	1.3	1.81	0.75	10	ND	4.02	0.02	0.13	0.15	8.7	NA
RVTP2_040417_115	April	TRZ	2017-04-05	110	115	110	2.52	1.2	1.33	0.17	6.12	17.98	4.919	16.31	41.81	27.46	1	6.1	4.2	1.35	2.37	0.69	8.6	ND	2.79	0.01	0.15	0.13	7.9	NA
RVTP2_040417_125	April	TRZ	2017-04-05	120	125	120	2.14	0.61	1.53	0.11	6.81	15.68	4.868	14.43	44.03	21.41	5.6	5.8	4.1	1.13	2.27	0.55	6.3	ND	1.68	ND	0.19	0.24	4.9	NA
RVTP2_040417_135	April	TRZ	2017-04-05	130	135	130	1.24	0.27	0.97	0.08	9.46	15.71	3.044	15.64	26.33	19.18	3.1	6.1	0.8	0.82	1.9	0.36	6.5	ND	0.95	0.002	0.33	0.14	1.9	NA
RVTP2_040417_145	April	clay	2017-04-05	140	145	140	0.51	0.15	0.36	0.07	13.66	11.51	1.308	17.9	11.36	16.75	2.4	4.5	1.5	0.49	0.77	0.05	0.5	ND	0	0.02	0.12	0.01	2.3	NA
RVTP2_040417_155	April	aquifer	2017-04-05	150	155	10	1.98	1.24	0.74	0.18	4.98	18.08	0.9864	17.17	22.62	30.77	4.9	5.2	1.1	1.26	0.48	0.11	0.1	0.01	0.14	0.16	0.04	0.03	11.1	NA
RVTP2_040417_15	April	topsoil	2017-04-05	10	15	150	0.24	0.27	0	0.06	20.92	5.12	1.235	26.74	9.253	12.97	6.1	6.5	1.8	0.44	0.61	0.05	0	ND	0	0.01	0.48	0.01	1.4	NA
RVTP2_040417_165	April	aquifer	2017-04-05	160	165	160	0.38	0.24	0.14	0.07	13.6	9.02	4.4	18.51	12.66	13.53	2.2	6.5	2.1	0.63	1.08	0.38	5.5	ND	2.19	ND	0.15	0.04	10.5	NA
RVTP2_040417_25	April	evaporite	2017-04-05	20	25	20	1.36	0.82	0.55	0.14	5.93	19.21	1.82	16.33	21.73	37.05	5.4	4.6	2.2	1.59	0.74	0.28	4	0.01	0.58	0.06	0.1	0.03	6	NA
RVTP2_040417_35	April	evaporite	2017-04-05	30	35	30	0.96	0.54	0.42	0.1	4.77	19.35	3.817	17.41	25.17	34.83	4.8	4.7	1.5	1.41	0.93	0.59	7	0.004	2.47	0.02	0.12	0.04	3.7	NA
RVTP2_040417_45	April	evaporite	2017-04-05	40	45	40	1.55	0.9	0.65	0.16	5.83	19.08	1.947	16.75	20.39	32.5	3.6	4.9	0.8	1.33	1.11	0.25	4.3	ND	0.39	0.07	0.1	0.04	3.4	NA
RVTP2_040417_55	April	evaporite	2017-04-05	50	55	50	1.71	1.08	0.63	0.16	4.83	18.54	8.867	17.38	28.09	33.42	4.2	4.2	1.3	1.43	1.6	0.87	5.9	0.02	4.74	0.04	0.09	0.08	5.5	NA
RVTP2_040417_5	April	topsoil	2017-04-05	0	5	0	6.97	6.61	0.37	0.65	3.7	16.35	1.125	18.67	17.63	28.09	1.2	3.6	4.7	2.02	0.4	0.05	0	0.06	0.02	0.09	0.05	0.02	24.9	NA
RVTP2_040417_65	April	sand	2017-04-05	60	65	60	1.61	0.56	1.05	0.12	6.51	16.94	5.278	16.8	33.56	23.54	3.9	4.8	1.4	0.99	1.44	0.5	5.1	ND	2.12	0.02	0.05	0.1	9.6	NA
RVTP2_040417_75	April	sand	2017-04-05	70	75	70	0.7	0.17	0.53	0.07	11.5	11.33	2.241	15.63	23.79	12.98	1.7	4.6	ND	0.47	0.94	0.12	1.8	ND	0.15	0.02	0.09	0.02	0.4	NA
RVTP2_040417_85	April	evapclay	2017-04-05	80	85	80	0.8	0.23	0.57	0.07	11.29	12.12	1.567	15.58	23.73	13.34	1.9	5.3	ND	0.56	0.95	0.07	0.8	ND	0	0.04	0.19	0.03	0	NA
RVTP2_040417_95	April	evapclay	2017-04-05	90	95	90	1.21	0.3	0.91	0.08	5.57	14.63	7.869	14.57	32.55	17.29	2.2	5.3	0.9	0.89	1.33	0.5	5.6	ND	4.41	0.01	0.11	0.1	4	NA
RVTP2_051817_105_120	May	TRZ	2017-05-18	135	143	105	0.87	0.27	0.6	0.04	7.27	15.06	4.948	15.26	24.45	20.34	3.2	10.5	2.1	0.81	2.1	0.45	5.3	ND	1.5	ND	0.75	0.06	2.3	20.5
RVTP2_051817_120_130	May	clay	2017-05-18	150	155	120	0.36	0.27	0.09	0.03	7.16	13.55	7.704	16.94	13.98	21.2	4.4	8.3	7.3	0.72	1.9	0.62	6.9	ND	4.7	ND	0.69	0.03	45.8	18
RVTP2_051817_130_140	May	aquifer	2017-05-18	160	165	130	0.15	0.12	0.03	0.02	14.8	4.85	4.423	19.72	10.1	8.502	1.2	7.5	3	0.36	0.7	0.13	1.3	ND	0.4	ND	0.21	0.03	10.8	17.7
RVTP2_051817_15	May	evaporite	2017-05-18	28	33	10	0.96	0.61	0.35	0.06	3.05	17.15	1.898	14.24	18.59	36.24	4.9	4.8	2.6	0.5	0.9	0.37	6	0.03	0.8	0.02	0.12	0.24	65.2	19.4
RVTP2_051817_25	May	evaporite	2017-05-18	38	43	20	1.52	0.91	0.61	0.12	5.19	17.81	1.887	16.14	21.61	30.66	2.9	4.7	2.4	1.99	1.7	0.35	7.6	0.002	0.5	0.02	0.08	0.07	1.8	21
RVTP2_051817_35	May	evaporite	2017-05-18	50	55	30	1.62	0.88	0.75	0.09	4.27	15.77	7.549	15.63	32.75	25.02	4.1	4.2	1.9	1.28	1.9	0.68	5.4	ND	3.1	0.005	0.06	0.06	7.4	16.4
RVTP2_051817_50	May	sand	2017-05-18	70	75	45	0.55	0.17	0.38	0.02	10.37	10.06	1.2	14.18	20.13	10.78	1.8	4.8	ND	1	1.6	0.57	10	ND	3.4	0.02	0.04	0.02	3.2	18.2
RVTP2_051817_5	May	topsoil	2017-05-18	10	15	0	2.63	1.74	0.9	0.21	3.19	16.98	0.7308	16.61	20.7	30.55	2.9	4	2.1	0.77	0.4	0.06	0	0.01	0	0.07	0.09	0.56	81.7	12.6
RVTP2_051817_60	May	evapclay	2017-05-18	85	90	55	1.5	0.73	0.78	0.06	6.07	15.22	3.536	15.54	28.58	20.57	3.6	5.2	1.1	1.08	1.9	0.59	9.8	ND	2.5	ND	0.09	0.06	13.1	21
RVTP2_051817_70	May	TRZ	2017-05-18	95	100	65	1.86	1.16	0.7	0.12	6.87	16.85	1.986	16.79	19.4	25.65	2.6	5.6	1.6	1.31	2.2	0.4	10	ND	0.7	5e-05	0.09	0.03	11.5	23.7
RVTP2_051817_80_90	May	TRZ	2017-05-18	110	115	80	2.22	1.2	1.02	0.12	5.56	16.62	3.053	15.49	32.6	25.3	3.2	6.2	3.8	1.4	2	0.72	10	ND	2.3	ND	0.16	0.1	8.2	23.9
RVTP2_051817_90_100	May	TRZ	2017-05-18	120	125	90	1.84	0.38	1.46	0.05	6.72	15.01	2.663	14.09	49.44	17.43	2.8	6	2.4	0.63	0.66	0.6	2.71	ND	3.4	ND	0.16	0.1	8.2	22.8
RVTP2_070717_105_125	July_1	TRZ	2017-07-07	115	125	105	1.38	0.2	1.18	0.05	6.01	14.16	2.753	14.78	35.1	18.9	2.9	7.9	3.1	0.88	1.34	0.33	7	ND	1.37	0.01	0.24	0.56	23.49	19.4
RVTP2_070717_125_145	July_1	TRZ	2017-07-07	135	145	125	0.35	0.63	0.88	0.03	9.27	12.18	3.993	16.06	11.41	19.84	2.8	7.7	6.5	0.66	2.25	0.31	6	ND	1.22	0.04	0.59	0.09	28.9	19.3
RVTP2_070717_145_160	July_1	aquifer	2017-07-07	155	160	145	0.17	0.6	0.74	0.02	12.87	10.28	3.178	15.94	7.801	15.18	2.2	7.3	14.7	0.5	1.66	0.05	1.8	ND	0	0.1	0.72	0.3	19.3	19.4
RVTP2_070717_15	July_1	topsoil	2017-07-07	20	25	10	1.53	1.58	0	0.13	3.36	16.24	1.361	15.87	19.15	33.79	3.9	4.2	2.4	1.76	0.54	0.26	4.8	0.0004	0.63	0.07	0.14	0.03	44.99	21.9
RVTP2_070717_33	July_1	evaporite	2017-07-07	35	43	25	1.7	1.11	0.6	0.13	2.31	15.95	8.844	15.66	33.86	31.52	3.8	4.6	1.8	1.54	0.53	0.7	4.9	0.02	4.33	ND	0.17	0.08	14.06	20.5
RVTP2_070717_48	July_1	evaporite	2017-07-07	50	58	40	2.43	1.7	0.73	0.15	2.54	16.31	2.51	16.18	32.61	22.85	3.8	5	3.9	1.56	0.61	0.36	4.1	ND	0.85	0.06	0.37	0.03	12.15	22.3
RVTP2_070717_5	July_1	topsoil	2017-07-07	10	15	0	3.83	1.31	1.18	0.31	4.4	14.74	1.23	16.97	20.48	25.88	2.8	4.6	3.3	1.78	0.49	0.1	0.2	0.03	0.14	0.05	0.12	0.04	43.77	24.2
RVTP2_070717_65	July_1	sand	2017-07-07	65	75	55	2.33	0.85	1.48	0.08	3.41	15.07	2.852	13.38	59.66	18.5	2.6	6	5.5	1.24	0.66	0.3	3.2	ND	0.68	0.08	0.19	0.05	8.16	22.5
RVTP2_070717_75_105	July_1	evapclay	2017-07-07	85	100	75	2.29	0.24	2.04	0.14	5.32	14.16	4.246	14.38	49.43	18.3	3.2	5.9	2.4	1.05	1.29	0.44	5.5	ND	1.73	0.05	0.37	0.13	11.54	21.9
RVTP2_072517_103_113	July_2	TRZ	2017-07-25	128	133	103	1.16	0.36	0.8	0.05	6.82	17.51	2.156	17.08	27.93	22.95	4.1	6.5	1.1	0.41	0.83	0.33	1.46	0.05	1.09	0.02	0.21	0.26	40.1	20.8
RVTP2_072517_113_120	July_2	clay	2017-07-25	138	141	113	0.24	0.1	0.14	0.02	17.6	7.83	0.9351	23.01	13.21	12.46	0.6	3.8	1.6	0.19	0.62	0.1	0.48	0.02	0.23	0.01	0.23	0.03	28	9
RVTP2_072517_120_130	July_2	aquifer	2017-07-25	145	150	120	0.21	0.11	0.11	0.02	17.98	6.47	1.01	21.63	12.15	10.11	0.7	5.2	2.3	0.29	0.65	0.11	0.54	0.03	0.27	0.02	1.35	0.09	17.5	12.7
RVTP2_072517_82_94	July_2	evapclay	2017-07-25	107	113	82	2.59	2.15	0.44	0.17	2.3	17.53	5.916	16.79	27.02	27.92	1.6	5.2	5.9	0.94	1.26	0.77	4.02	0.1	3.31	0.03	0.14	0.28	67.3	22.4
RVTP2_072517_94_103	July_2	TRZ	2017-07-25	119	123	94	1.64	0.63	1.01	0.07	4.6	18.45	3.788	17.39	40.99	28.29	5.3	5.5	3	0.67	0.89	0.54	2.55	0.07	2.14	0.02	0.19	0.44	35.8	21.3
RVTP2_082917_112_125	August	TRZ	2017-08-29	127	124	112	1	0.33	0.67	0.04	8.74	18.3	2.536	17.98	25.89	25.28	3.7	4.1	2.4	0.65	1.94	0.56	3.7	0.06	2.58	0.01	0.24	0.55	60	19.8
RVTP2_082917_135_148	August	aquifer	2017-08-29	150	157	135	0.39	0.31	0.08	0.05	11.91	13.04	5.061	18.75	12.53	18.56	3.8	6.1	10.1	0.24	1.89	0.43	3.58	0.05	2.64	0.04	0.26	0.85	146.7	17.1
RVTP2_082917_75_85	August	evapclay	2017-08-29	95	100	75	2.44	1.49	0.95	0.14	4.9	17.76	3.091	14.91	72.93	21.09	2.4	4.5	3.1	0.98	1.14	0.51	2.22	0.07	1.47	0.02	0.12	0.56	41.6	20.7
RVTP2_082917_95_105	August	TRZ	2017-08-29	110	105	95	1.86	0.3	1.55	0.05	6.32	17.78	3.747	16.04	56.64	19.95	2.9	4.4	1.8	0.54	0.96	0.33	1.58	0.04	1.09	0.01	0.18	0.69	14.4	19
RVTP2_091317_115_130	September	TRZ	2017-09-13	129	137	114	1.15	0.41	0.73	0.04	11.26	17.92	3.756	17.16	29.28	22.19	1.9	3.6	2.5	0.54	2.26	0.27	2.2	0.04	0.81	0.02	0.19	0.48	48.3	19.7
RVTP2_091317_139_150	September	aquifer	2017-09-13	155	160	140	0.66	0.59	0.07	0.03	11.43	15.58	4.843	18.01	17.48	19.33	2.2	4.7	5.7	0.17	2.25	0.27	2.48	0.04	1.07	0.02	0.13	0.15	108.9	17.1
RVTP2_091317_150_160	September	aquifer	2017-09-13	165	170	150	0.63	0.44	0.18	0.04	9.96	15.22	1.648	19.61	13.17	17.39	2.7	7.2	19.1	0.44	1.51	0.05	0.82	0.03	0.06	0.03	0.41	1.46	99.7	14.3
RVTP2_091317_80_90	September	TRZ	2017-09-13	100	105	80	1.95	0.91	1.04	0.08	5.15	17.67	4.695	15.78	54.65	22.5	3.6	4.2	2.3	0.65	1	0.62	3.82	0.05	3.52	0.01	0.09	0.85	4.1	16.5
RVTP2_091317_90_104	September	TRZ	2017-09-13	110	117	90	1.98	0.39	1.59	0.05	6.83	17.26	2.899	15.6	67.06	19.3	3.6	4.8	1	0.4	1.11	0.28	1.46	0.03	0.9	0.01	0.1	0.54	6.9	20.4
RVT_082917_130	August	clay	2017-08-29	140	130	125	0.6	0.31	0.29	0.04	12.69	14.46	4.235	17.9	15.39	19.94	3.2	6.2	1.3	0.41	2.43	0.41	3.18	0.04	1.6	0.01	0.41	0.37	87.9	16.8
RVT_082917_90	August	evapclay	2017-08-29	100	90	85	2.44	0.6	1.84	0.06	4.78	19.57	1.771	17.8	23.51	35.76	4.9	3.3	ND	0.73	1.07	0.61	3.49	0.05	3.11	0.02	0.14	1.23	65.8	19.3
NA = Not applicable; no sample collected
Italics indicate imputed sample data (see Materials and Methods for details)

## Sheet: Metadata
Project	SLAC Groundwater Quality SFA
Location	Riverton research site, Installation pit 2
	N 42.98864, W 108.40006
Dataset title	RVT_Sediment_2017
Date range	4/5/2017-9/13/2017
Contact	Kristin Boye, kboye@slac.stanford.edu
Project/funding	DOE BER Groundwater Quality SFA, contract no DE-AC02-76SF00515
DOI/Citation
Dataset description	Sediment samples taken by hand augur within 0.5 m radius from installation pit 2. Solid phase and extraction biogeochemical data. Values are averages of number of replicate measurements listed in table below
Methods	Descriptions under methods tab; more detail in Materials and Methods section
Missing data value	NA
Analyzed, but not detected value	ND
Imputed data (for missing values)	Italicized; see Materials and Methods for details of imputation using mice package in R
Column Header	Format	Units	No of imputed measurements	Method	Description
Sample ID	Text	NA	NA	NA	Unique sample identifier
Month	Text	NA	NA	NA	Sampling month
Soil Horizon	Text	NA	NA	NA	Classification of soil layer based on depth and soil characteristics (see Figure S2)
Date	MM/DD/YYYY	NA	NA	NA	Sampling date
Corr_depth	Numerical	cm	NA	NA	Top of depth interval collected (adjusted to total Org-C values)
Depth_mid	Numerical	cm	NA	NA	Middle depth of interval collectected
Depth_top	Numerical	cm	NA	NA	Top of depth interval collected (as measured in field)
Tot_C	Numerical	%	NA	EA	Total concentration in dry sediment
Tot_OrgC	Numerical	%	3	1M HCl, EA	Total organic C in dry sediment after treatment with 1M HCl
Tot_CO3-C	Numerical	%	3	EA	Difference between Tot_C and Org_C
Tot_N	Numerical	%	NA	EA	Total concentration in dry sediment
Tot_Na	Numerical	mg/g	NA	XRF	Total concentration in dry sediment
Tot_Mg	Numerical	mg/g	NA	XRF	Total concentration in dry sediment
Tot_S	Numerical	mg/g	NA	XRF	Total concentration in dry sediment
Tot_Fe	Numerical	mg/g	NA	XRF	Total concentration in dry sediment
Tot_K	Numerical	mg/g	NA	XRF	Total concentration in dry sediment
Tot_Ca	Numerical	mg/g	1	XRF	Total concentration in dry sediment
Tot_As	Numerical	ug/g	1	XRF	Total concentration in dry sediment
Tot_Mo	Numerical	ug/g	NA	XRF	Total concentration in dry sediment
Tot_U	Numerical	ug/g	NA	XRF	Total concentration in dry sediment
Sol_OrgC	Numerical	mg/g	1	MilliQ water extraction, NPOC method on TOC analyzer	Water soluble fraction, per g dry sediment
Sol_Na	Numerical	mg/g	1	MilliQ extraction, ICP-MS	Water soluble fraction, per g dry sediment
Sol_Mg	Numerical	mg/g	1	MilliQ extraction, ICP-MS	Water soluble fraction, per g dry sediment
Sol_S	Numerical	mg/g	1	MilliQ extraction, ICP-OES	Water soluble fraction, per g dry sediment
Sol_K	Numerical	mg/g	NA	MilliQ extraction, ICP-MS	Water soluble fraction, per g dry sediment
Sol_Ca	Numerical	mg/g	1	MilliQ extraction, ICP-MS	Water soluble fraction, per g dry sediment
Sol_As	Numerical	ug/g	4	MilliQ extraction, ICP-MS	Water soluble fraction, per g dry sediment
Sol_Mo	Numerical	ug/g	4	MilliQ extraction, ICP-MS	Water soluble fraction, per g dry sediment
Sol_U	Numerical	ug/g	4	MilliQ extraction, ICP-MS	Water soluble fraction, per g dry sediment
HCl_FeII	Numerical	ug/g	2	HCl extraction, ICP-OES	Water soluble fraction, per g dry sediment
Moisture	Numerical	% H2O	NA	Gravimetric	Water content in field moist soil at time of incubation

## Sheet: Methods
Method name	Description	Reference
EA	20-40 mg of pulverized dry sediment, analyzed on a Carlo Erba NA1500 elemental analyzer
1M HCl	Dropwise addition of 1 M HCl to soil suspension until effervescence ceases, decanting and drying @ 30 °C until completely dry (5-7 days)
XRF	1-3 g of pulverized sediment analyzed by X-ray Fluorescence Spectroscopy on an Spectro Xepos HE
MilliQ water extract	1:10 sediment:milliQ extraction, 2 hr shake, centrifuge 4000 rpm, filtration (0.22 um)
HCl extract	1:10 sediment:0.5 M HCl extraction, 2 hr shake, centrifuge 4000 rpm, filtration (0.22 um)
ICP-OES	inductively coupled plasma optical emission spectroscopy (ICP-OES, iCAP6000, Thermo Scientific, Cambridge, UK)
ICP-MS	inductively coupled plasma mass spectroscopy (Thermo XSeries II)
Gravimetric	Weighing of samples before and after drying at 105°C to determine water content
