# Supplementary material
Source: Frontiers journal article supplement (https://www.frontiersin.org/articles/554046)
Supplement: Table_2.XLSX [file Table_2.XLSX]

## Sheet: Table S2
OTU_ID	Domain	Phylum	Class	Order	Family	Genus	Total_seqs	Apr005	Apr015	Apr025	Apr035	Apr045	Apr055	Apr065	Apr075	Apr085	Apr095	Apr105	Apr115	Apr125	Apr135	Apr145	Apr155	Apr165	Aug005	Aug009	Aug020	Aug030	Aug040	Aug048	Aug060	Aug065	Aug075	Aug090	Aug095	Aug105	Aug112	Aug130	Aug135	Aug148	Jul005	Jul015	Jul033	Jul048	Jul065	Jul075	Jul105	Jul125	Jul145
Otu00001	Bacteria	Proteobacteria	Deltaproteobacteria	Desulfobacterales	Desulfobulbaceae	Desulfobulbaceae_ge	135938	2	16	84	50	142	221	200	514	952	406	2601	1928	1435	3638	4778	3155	954	0	18	180	99	139	54	408	851	4581	85	2675	248	2979	117	10917	269	1	403	175	191	613	4179	4649	3061	1534
Otu00002	Bacteria	Proteobacteria	Gammaproteobacteria	Betaproteobacteriales	Nitrosomonadaceae	MND1	116919	6	3	2	34	23	50	265	790	4609	4263	6809	7978	4100	3330	2748	4166	1743	4	5	8	9	118	516	282	1216	4750	630	4054	842	2729	428	722	368	0	231	24	571	1036	1153	1842	1255	3786
Otu00003	Bacteria	Proteobacteria	Deltaproteobacteria	Desulfuromonadales	Desulfuromonadaceae	Desulfuromonas	213001	1	7	9	24	182	156	117	351	2852	844	2911	3495	2665	2959	6477	4710	3598	3	118	207	21	51	33	139	885	1937	100	2958	496	6131	455	25249	2130	1	149	52	68	318	5908	19038	7339	832
Otu00004	Bacteria	Proteobacteria	Deltaproteobacteria	MBNT15	MBNT15_fa	MBNT15_ge	108567	1	2	16	22	26	135	1477	702	1415	2688	4271	3566	3032	1552	1170	1715	1754	0	3	76	282	328	345	217	879	4720	1042	2048	596	1828	386	1923	4245	1	115	275	1295	1217	585	598	2368	778
Otu00005	Bacteria	Proteobacteria	Gammaproteobacteria	Acidiferrobacterales	Acidiferrobacteraceae	Sulfurifustis	76121	1	3	11	1	4	13	71	523	1511	1579	1062	1760	1275	1742	1701	2184	3555	1	8	22	23	159	67	56	606	2314	183	2408	804	3148	232	2604	2007	0	5	8	62	235	1482	2333	1279	778
Otu00006	Bacteria	Proteobacteria	Gammaproteobacteria	Betaproteobacteriales	Hydrogenophilaceae	Thiobacillus	64984	10	190	97	55	106	224	100	1069	1000	217	1656	1183	739	156	166	335	9552	95	102	149	127	232	56	129	142	2119	14	235	50	286	36	701	1208	324	197	92	44	105	251	221	765	227
Otu00007	Bacteria	Proteobacteria	Deltaproteobacteria	Desulfobacterales	Desulfobulbaceae	Desulfurivibrio	61207	0	2	3	2	4	5	83	71	531	191	457	216	738	614	1438	423	656	1	26	11	23	47	47	42	750	374	551	3340	447	1995	119	1005	351	0	149	41	93	548	5054	4069	548	532
Otu00008	Bacteria	Proteobacteria	Gammaproteobacteria	Steroidobacterales	Woeseiaceae	Woeseia	78485	14	1509	2264	1237	4877	3875	2164	1491	3627	3283	3419	3076	819	1231	511	571	343	70	297	1794	629	278	386	706	564	2060	240	683	158	741	217	32	149	22	706	786	640	369	404	479	92	317
Otu00009	Bacteria	Gemmatimonadetes	Gemmatimonadetes	Gemmatimonadales	Gemmatimonadaceae	uncultured	48160	193	707	374	246	341	314	1269	1436	2580	1691	1114	710	1118	510	583	51	453	215	317	295	230	694	859	487	535	457	799	2681	265	485	100	97	217	208	667	257	520	743	370	189	128	120
Otu00010	Bacteria	Proteobacteria	Alphaproteobacteria	Rhizobiales	Methyloligellaceae	uncultured	53382	3	26	81	102	32	136	1165	995	2317	2290	1061	815	1118	1511	1369	487	495	5	9	44	184	756	894	483	462	598	711	2936	539	1914	384	480	1402	1	112	162	221	320	741	780	733	1133
Otu00011	Bacteria	Proteobacteria	Alphaproteobacteria	Rhodovibrionales	Kiloniellaceae	Pelagibius	39155	0	280	515	595	547	682	879	839	1857	1830	1238	2603	614	1266	612	770	187	3	98	760	261	159	223	322	390	457	47	678	254	1067	67	45	58	1	272	184	271	154	437	780	116	569
Otu00012	Bacteria	Proteobacteria	Gammaproteobacteria	Pseudomonadales	Pseudomonadaceae	Pseudomonas	39802	9	10	36	88	111	88	272	197	932	859	1274	1056	1250	747	2046	1609	587	5	6	120	44	137	95	97	231	624	33	760	153	1989	37	217	86	1	12	37	74	177	584	1140	262	319
Otu00013	Bacteria	Proteobacteria	Deltaproteobacteria	Desulfuromonadales	Desulfuromonadaceae	Desulfuromonas	38774	2	169	477	295	161	416	635	590	2001	989	2385	923	1128	143	500	179	395	1	24	29	185	279	198	310	676	2090	98	275	60	366	13	71	89	0	396	387	764	391	1499	755	182	306
Otu00014	Bacteria	Proteobacteria	Gammaproteobacteria	Oceanospirillales	Nitrincolaceae	Marinobacterium	34554	2	0	2	0	5	14	136	269	1336	1192	1978	1731	1555	1202	1990	931	193	1	0	8	7	52	129	55	132	423	35	813	154	1347	48	31	83	1	0	10	82	274	547	523	152	165
Otu00015	Bacteria	Proteobacteria	Alphaproteobacteria	uncultured	uncultured_fa	uncultured_ge	24913	120	506	498	381	1127	843	613	881	1250	734	195	55	100	365	671	449	123	232	320	475	140	259	323	234	147	60	26	265	195	593	91	67	36	130	243	243	78	25	109	204	164	23
Otu00016	Bacteria	Acidobacteria	Subgroup_6	Subgroup_6_or	Subgroup_6_fa	Subgroup_6_ge	41256	876	2237	1717	899	2459	1103	716	857	902	374	461	319	180	33	69	135	153	552	709	1285	415	449	420	491	118	327	92	54	21	35	65	53	228	1030	900	461	363	267	22	25	42	30
Otu00017	Bacteria	Acidobacteria	Subgroup_6	Subgroup_6_or	Subgroup_6_fa	Subgroup_6_ge	42717	681	1471	1104	379	445	480	910	873	1715	1237	783	903	546	937	888	1171	341	457	536	471	238	351	446	296	233	330	290	712	158	705	309	62	105	647	573	236	440	314	187	316	168	408
Otu00018	Bacteria	Actinobacteria	Actinobacteria	Actinobacteria_unclassified	Actinobacteria_unclassified	Actinobacteria_unclassified	34247	2	552	1159	1646	2370	2564	382	176	449	345	1769	681	426	14	56	12	174	43	247	1443	430	125	129	491	126	1569	37	28	18	54	21	17	23	6	192	876	128	30	25	26	9	15
Otu00019	Bacteria	Actinobacteria	Actinobacteria	Actinobacteria_unclassified	Actinobacteria_unclassified	Actinobacteria_unclassified	33126	1	268	329	417	38	267	1273	919	667	656	1198	2409	1495	91	163	14	565	14	124	386	632	456	291	462	310	2338	452	198	71	137	30	8	27	20	208	212	427	618	49	39	22	22
Otu00020	Bacteria	Actinobacteria	Acidimicrobiia	Actinomarinales	uncultured	uncultured_ge	42258	3	565	499	311	1219	845	1520	919	1935	2405	2111	1716	1095	730	387	513	415	53	230	622	499	441	277	431	352	1095	272	515	118	637	144	20	81	5	247	590	350	342	234	348	164	532
Otu00021	Bacteria	Proteobacteria	Alphaproteobacteria	Rhodospirillales	Rhodopirillaceae	Defluviicoccus	26038	57	326	76	17	4409	2025	386	93	175	79	480	1139	264	22	44	3	66	198	72	2635	336	90	61	251	39	1254	242	22	3	4	7	4	14	69	48	677	223	295	14	18	12	23
Otu00022	Bacteria	Acidobacteria	Subgroup_6	Subgroup_6_or	Subgroup_6_fa	Subgroup_6_ge	18817	449	481	371	214	141	162	473	358	803	651	413	207	217	312	346	516	163	195	233	104	85	138	250	181	156	137	203	375	115	302	158	79	80	331	213	111	226	156	98	137	120	104
Otu00023	Bacteria	Proteobacteria	Gammaproteobacteria	Acidiferrobacterales	Acidiferrobacteraceae	Sulfurifustis	27876	0	0	0	0	0	1	2	17	398	701	209	95	503	1941	2397	1763	350	1	0	0	0	0	84	58	60	117	212	2575	246	2022	160	39	9	0	0	0	2	95	581	477	411	58
Otu00024	Bacteria	Actinobacteria	MB-A2-108	MB-A2-108_or	MB-A2-108_fa	MB-A2-108_ge	43642	2	49	179	225	7	13	1905	1554	2041	1685	1017	1623	2007	646	875	82	589	2	47	23	423	843	527	422	663	923	999	2003	441	542	62	21	86	2	207	104	381	600	217	129	152	97
Otu00025	Bacteria	Proteobacteria	Deltaproteobacteria	Desulfuromonadales	Desulfuromonadaceae	Desulfuromonadaceae_unclassified	2303	0	0	0	0	5	3	2	1	7	19	26	24	31	136	231	113	20	0	0	0	1	0	0	2	9	99	0	41	0	33	1	51	7	0	4	0	0	3	127	39	40	6
Otu00026	Bacteria	Planctomycetes	Planctomycetacia	Pirellulales	Pirellulaceae	Pir4_lineage	16247	74	197	189	84	267	229	693	518	1427	724	210	316	216	204	190	50	92	106	207	257	191	334	420	255	129	203	289	178	68	111	74	8	24	73	219	209	126	130	53	36	45	80
Otu00027	Bacteria	Proteobacteria	Gammaproteobacteria	Betaproteobacteriales	Nitrosomonadaceae	MND1	26406	44	978	705	481	965	638	825	967	977	228	416	248	125	32	47	14	157	301	555	840	194	235	281	239	66	283	35	114	20	26	12	15	52	270	869	354	339	91	15	35	23	9
Otu00028	Bacteria	Proteobacteria	Deltaproteobacteria	Desulfobacterales	Desulfobulbaceae	Desulfobulbaceae_unclassified	10200	2	2	0	0	1	35	5	5	16	9	24	37	38	612	1268	492	41	0	0	1	0	0	0	0	235	820	0	44	5	32	24	39	5	1	2	0	20	4	2398	119	21	93
Otu00029	Bacteria	Proteobacteria	Gammaproteobacteria	Betaproteobacteriales	Nitrosomonadaceae	MND1	21481	11	334	410	315	281	363	505	570	843	823	607	546	265	167	159	73	131	33	327	592	247	226	251	208	242	603	59	296	63	179	34	17	103	197	447	288	321	90	95	158	78	48
Otu00030	Bacteria	Proteobacteria	Gammaproteobacteria	PLTA13	PLTA13_fa	PLTA13_ge	22084	4	103	427	412	72	131	825	1035	761	1322	775	303	187	60	76	36	60	7	102	50	80	255	309	196	394	309	53	43	10	21	10	7	26	9	592	201	1212	206	27	35	35	24
Otu00031	Bacteria	Proteobacteria	Deltaproteobacteria	Desulfobacterales	Desulfobulbaceae	uncultured	39518	0	0	0	0	1	0	0	0	30	7	19	17	37	247	424	783	1021	1	0	0	1	1	0	1	23	48	8	835	348	2528	139	9239	219	0	0	0	0	1	1031	4199	1224	89
Otu00032	Bacteria	Gemmatimonadetes	AKAU4049	AKAU4049_or	AKAU4049_fa	AKAU4049_ge	37446	36	1080	1260	834	693	664	1145	700	1121	756	1305	584	586	275	236	69	235	89	846	901	492	362	308	356	512	355	99	238	85	169	59	50	103	349	540	393	573	180	39	83	67	36
Otu00033	Bacteria	Proteobacteria	Deltaproteobacteria	Desulfuromonadales	Sva1033	Sva1033_ge	27312	0	0	0	0	2	0	6	5	84	147	523	1161	500	393	668	1905	822	0	0	1	0	1	0	0	60	504	11	500	164	1427	92	1196	93	0	0	0	0	12	614	2651	1672	471
Otu00034	Bacteria	Acidobacteria	Holophagae	Subgroup_7	Subgroup_7_fa	Subgroup_7_ge	27197	2	3	16	20	0	0	1070	2419	2255	1014	143	164	329	346	251	23	191	4	4	1	116	1076	662	384	208	29	766	1147	255	280	177	85	133	0	29	39	621	579	71	53	92	73
Otu00035	Bacteria	Actinobacteria	Thermoleophilia	Gaiellales	Gaiellaceae	Gaiella	14950	3	60	91	67	5	12	286	507	710	726	143	523	532	204	174	17	194	2	68	17	77	352	235	173	131	125	494	1322	165	95	18	38	77	2	112	55	147	212	168	45	57	61
Otu00036	Bacteria	Proteobacteria	Alphaproteobacteria	Tistrellales	Geminicoccaceae	uncultured	26611	35	295	348	220	548	1004	912	756	820	477	1243	1263	679	104	163	21	152	43	55	727	559	324	353	557	263	772	352	107	64	92	61	11	46	27	109	366	242	251	74	54	22	33
Otu00037	Bacteria	Proteobacteria	Deltaproteobacteria	Deltaproteobacteria_unclassified	Deltaproteobacteria_unclassified	Deltaproteobacteria_unclassified	31957	0	51	190	155	156	444	1047	896	2100	1468	1350	1151	763	266	291	160	305	2	86	190	297	341	400	280	498	1628	462	954	74	190	25	7	46	4	218	184	295	416	109	113	112	48
Otu00038	Bacteria	Actinobacteria	Thermoleophilia	Gaiellales	uncultured	uncultured_ge	19576	18	275	211	247	43	58	1158	907	1090	692	415	700	645	249	238	15	209	33	134	198	279	614	369	284	98	399	349	471	112	96	28	1	29	33	199	175	150	237	72	35	30	14
Otu00039	Bacteria	Actinobacteria	Acidimicrobiia	Actinomarinales	uncultured	uncultured_ge	16225	0	0	3	4	1	5	223	168	551	404	381	144	435	520	602	615	366	0	1	1	10	58	82	45	234	129	242	714	289	658	258	186	426	0	1	1	12	167	221	278	299	143
Otu00040	Bacteria	Bacteria_unclassified	Bacteria_unclassified	Bacteria_unclassified	Bacteria_unclassified	Bacteria_unclassified	16896	8	216	379	325	32	114	911	517	724	317	611	869	468	84	100	2	128	20	93	55	174	193	245	153	125	685	637	123	33	22	11	3	12	13	256	125	220	518	32	12	12	11
Otu00041	Archaea	Thaumarchaeota	Nitrososphaeria	Nitrososphaerales	Nitrososphaeraceae	Nitrososphaeraceae_ge	31079	233	548	228	72	3288	1987	301	463	872	512	568	691	275	228	196	14	153	165	160	1826	279	313	287	417	49	823	398	138	64	39	43	9	52	104	116	1031	168	152	74	56	42	24
Otu00042	Bacteria	Rokubacteria	NC10	Rokubacteriales	Rokubacteriales_fa	Rokubacteriales_ge	28247	2	153	630	667	568	371	1521	891	1124	1085	580	168	197	189	134	21	51	3	105	524	327	302	459	369	507	131	179	294	97	36	54	12	63	1	638	460	993	216	7	4	5	22
Otu00043	Bacteria	Actinobacteria	Acidimicrobiia	Microtrichales	uncultured	uncultured_ge	32421	32	402	715	840	1453	1534	713	423	592	568	1974	2033	901	100	149	18	448	61	114	598	277	227	131	244	200	2014	128	219	52	153	29	57	34	15	148	512	154	211	69	45	30	17
Otu00044	Bacteria	Actinobacteria	Nitriliruptoria	Euzebyales	Euzebyaceae	uncultured	19286	22	760	820	773	2006	648	401	215	331	127	132	298	179	30	14	10	131	128	279	765	175	106	112	171	21	674	51	27	8	6	9	2	15	38	108	285	100	86	16	11	7	4
Otu00045	Bacteria	Chloroflexi	Anaerolineae	Anaerolineales	Anaerolineaceae	UTCFX1	21238	496	840	512	143	107	128	157	304	625	462	180	255	106	50	60	66	163	442	411	230	86	278	119	118	40	135	37	134	10	180	17	1564	574	384	203	52	165	75	54	67	397	281
Otu00046	Bacteria	Proteobacteria	Gammaproteobacteria	Gammaproteobacteria_unclassified	Gammaproteobacteria_unclassified	Gammaproteobacteria_unclassified	1469	1	33	44	27	124	99	54	26	68	53	55	62	13	23	15	10	10	1	12	36	7	9	7	10	4	28	2	12	0	14	2	1	1	2	17	14	11	6	5	5	0	3
Otu00047	Bacteria	Bacteroidetes	Bacteroidia	Cytophagales	Cyclobacteriaceae	uncultured	26283	0	2	0	0	1	0	0	6	638	1099	1690	1434	1502	1035	1268	466	373	0	0	0	0	1	20	28	263	831	236	1065	134	1520	355	76	104	0	1	0	1	190	443	608	186	91
Otu00048	Bacteria	Chloroflexi	Anaerolineae	Ardenticatenales	uncultured	uncultured_ge	14773	0	17	73	46	43	63	222	90	288	641	530	788	357	903	391	462	61	1	16	46	44	39	33	42	62	266	33	342	22	126	11	3	24	1	9	23	143	223	219	416	73	2033
Otu00049	Bacteria	Actinobacteria	Actinobacteria	Micromonosporales	Micromonosporaceae	Micromonosporaceae_unclassified	23331	1	63	79	34	3330	693	330	146	262	350	1135	1089	96	93	13	6	58	2	4	1683	205	25	26	181	14	1064	1	3	2	4	0	3	8	0	22	1619	160	14	7	4	8	5
Otu00050	Bacteria	Proteobacteria	Deltaproteobacteria	Desulfobacterales	Desulfobulbaceae	Desulfobulbaceae_ge	17636	0	14	15	20	36	43	49	101	171	51	140	77	72	348	447	154	916	21	29	26	36	82	40	70	40	98	10	200	170	156	12	1697	155	11	76	29	36	149	190	114	249	146
Otu00051	Bacteria	Actinobacteria	MB-A2-108	MB-A2-108_or	MB-A2-108_fa	MB-A2-108_ge	14093	4	191	161	124	18	41	606	838	1650	732	228	116	127	104	166	5	89	16	179	79	90	663	483	240	98	81	104	380	71	109	22	12	26	6	172	61	165	89	38	27	56	5
Otu00052	Bacteria	Acidobacteria	Subgroup_6	Subgroup_6_or	Subgroup_6_fa	Subgroup_6_ge	18287	384	922	970	471	167	183	567	452	564	353	243	108	116	78	84	100	56	200	536	196	215	331	271	199	54	243	39	42	10	23	25	10	26	448	556	160	352	73	16	8	17	7
Otu00053	Bacteria	Bacteroidetes	Bacteroidia	Cytophagales	Microscillaceae	uncultured	30610	1	26	506	407	1989	1475	287	140	406	1166	3584	1881	665	484	207	26	129	0	27	724	169	97	113	158	483	1227	78	134	6	114	18	7	42	1	197	501	590	275	170	75	28	453
Otu00054	Bacteria	Nitrospirae	Nitrospira	Nitrospirales	Nitrospiraceae	Nitrospira	17602	20	216	247	127	381	360	448	427	824	956	672	494	301	340	267	111	95	19	79	239	103	147	194	124	258	583	162	282	125	202	57	5	27	17	132	94	183	115	102	105	35	131
Otu00055	Bacteria	Actinobacteria	Acidimicrobiia	Actinomarinales	uncultured	uncultured_ge	5553	1	30	16	35	72	45	79	48	223	309	207	123	94	238	232	262	57	3	15	33	27	14	19	37	41	57	36	228	98	179	24	13	16	1	11	25	23	24	72	140	36	84
Otu00056	Bacteria	Gemmatimonadetes	BD2-11_terrestrial_group	BD2-11_terrestrial_group_or	BD2-11_terrestrial_group_fa	BD2-11_terrestrial_group_ge	36492	1	192	886	499	3515	1924	793	489	844	902	1434	2055	699	503	474	324	151	0	82	807	151	112	119	142	195	1065	130	243	97	406	285	24	36	1	214	578	101	121	173	309	47	196
Otu00057	Bacteria	Proteobacteria	Alphaproteobacteria	Rhizobiales	Hyphomicrobiaceae	uncultured	16717	73	208	96	17	27	108	218	367	691	750	462	461	215	892	391	733	129	57	39	53	75	131	157	149	118	116	97	299	214	429	151	127	193	38	37	44	56	114	171	446	90	1722
Otu00058	Bacteria	Planctomycetes	Planctomycetacia	Planctomycetales	Gimesiaceae	uncultured	12231	1	3	50	41	334	440	307	139	218	208	602	750	273	326	417	428	86	0	8	150	57	23	27	56	90	679	139	350	56	256	41	8	19	0	18	54	44	59	120	103	21	65
Otu00059	Bacteria	Proteobacteria	Deltaproteobacteria	Myxococcales	bacteriap25	bacteriap25_ge	12769	0	493	718	585	246	191	297	368	437	282	493	187	126	91	75	9	73	24	275	418	74	177	97	67	39	499	8	57	3	44	3	6	22	5	331	67	75	26	13	14	7	7
Otu00060	Bacteria	Chloroflexi	Gitt-GS-136	Gitt-GS-136_or	Gitt-GS-136_fa	Gitt-GS-136_ge	15688	208	822	615	592	306	292	360	395	758	285	231	187	139	36	70	23	55	264	255	206	128	210	274	192	89	182	95	124	43	59	24	2	12	98	255	134	59	87	21	16	17	16
Otu00061	Bacteria	Proteobacteria	Alphaproteobacteria	Azospirillales	Azospirillaceae	Skermanella	11594	1581	1078	821	125	154	285	40	13	84	16	263	12	29	3	47	4	24	629	255	76	33	33	15	95	3	0	2	1	5	1	40	1	9	718	142	102	20	6	2	7	5	4
Otu00062	Bacteria	Proteobacteria	Deltaproteobacteria	MBNT15	MBNT15_fa	MBNT15_ge	17078	0	0	0	0	0	0	0	28	92	283	79	262	390	934	501	56	260	0	0	0	1	6	13	8	38	389	73	669	133	763	162	358	465	0	11	0	88	13	96	150	491	787
Otu00063	Bacteria	Proteobacteria	Deltaproteobacteria	Desulfuromonadales	Desulfuromonadaceae	Desulfuromonas	9993	0	35	48	27	25	38	57	688	1701	164	38	41	33	13	53	149	115	7	38	60	26	64	82	44	22	5	1	66	21	67	2	378	69	29	123	55	31	58	99	181	382	172
Otu00064	Bacteria	Actinobacteria	MB-A2-108	MB-A2-108_or	MB-A2-108_fa	MB-A2-108_ge	17889	0	24	98	122	5	8	267	745	1173	1011	286	130	185	405	512	59	205	1	37	13	114	570	569	321	429	13	156	483	249	597	146	75	73	0	64	74	224	65	60	62	104	36
Otu00065	Bacteria	Actinobacteria	MB-A2-108	MB-A2-108_or	MB-A2-108_fa	MB-A2-108_ge	16727	0	42	40	31	9	13	1548	1288	1463	992	185	125	113	184	166	26	62	1	65	27	143	920	626	355	156	45	240	462	131	162	20	20	16	2	123	47	235	138	44	42	41	20
Otu00066	Bacteria	Chloroflexi	KD4-96	KD4-96_or	KD4-96_fa	KD4-96_ge	22646	349	761	444	296	140	170	364	811	1509	732	522	235	252	161	165	97	209	260	290	198	104	488	507	277	150	151	115	374	96	195	71	231	258	100	317	168	134	86	81	88	129	89
Otu00067	Bacteria	Proteobacteria	Gammaproteobacteria	Ectothiorhodospirales	Thioalkalispiraceae	Thioalkalispira	24441	1	1	4	6	47	112	266	288	2975	1134	667	92	392	37	124	105	313	0	0	163	37	14	41	51	132	5	3	70	70	374	150	133	155	0	6	4	9	15	207	1240	3997	205
Otu00068	Bacteria	Chloroflexi	Anaerolineae	Anaerolineales	Anaerolineaceae	uncultured	12951	0	95	130	37	70	77	282	242	472	438	301	224	157	143	149	320	125	6	92	114	99	154	80	90	37	162	24	143	29	215	7	287	674	1	22	38	63	50	144	328	471	149
Otu00069	Bacteria	Actinobacteria	Thermoleophilia	Solirubrobacterales	Solirubrobacteraceae	Solirubrobacter	7384	619	585	300	166	69	116	107	101	139	71	126	67	41	9	21	0	26	268	151	116	62	64	49	87	8	50	13	29	5	7	11	1	12	186	103	96	30	20	6	6	10	4
Otu00070	Bacteria	Actinobacteria	Acidimicrobiia	Actinomarinales	uncultured	uncultured_ge	12931	4	151	459	303	197	259	406	342	1660	658	242	257	107	212	142	48	60	8	113	209	127	179	343	204	47	85	29	102	45	89	21	3	22	0	48	114	49	31	101	115	15	80
Otu00071	Bacteria	Firmicutes	Bacilli	Bacillales	Bacillaceae	Bacillus	10971	9	93	562	212	320	675	122	119	318	146	103	114	82	81	134	12	36	12	73	48	101	204	146	103	95	92	53	37	71	72	22	26	181	205	148	203	60	20	27	28	43	34
Otu00072	Bacteria	Rokubacteria	NC10	Rokubacteriales	Rokubacteriales_fa	Rokubacteriales_ge	23807	6	344	179	201	178	548	997	957	723	820	775	943	766	182	161	19	183	18	179	410	267	299	297	262	268	720	993	321	62	69	52	17	52	13	327	245	251	281	39	30	34	55
Otu00073	Bacteria	Planctomycetes	Planctomycetacia	Pirellulales	Pirellulaceae	uncultured	7640	20	41	55	13	60	85	140	185	256	220	155	207	112	421	206	95	64	18	18	52	45	62	49	60	49	79	116	146	37	160	96	77	136	6	20	31	26	32	124	293	71	540
Otu00074	Bacteria	Actinobacteria	Actinobacteria	Micromonosporales	Micromonosporaceae	Micromonosporaceae_unclassified	10079	1498	522	226	47	28	177	11	17	139	56	289	139	117	11	33	6	44	967	306	56	33	103	16	53	6	145	8	3	4	7	23	7	14	488	97	16	15	12	1	8	9	4
Otu00075	Bacteria	Chloroflexi	Dehalococcoidia	S085	S085_fa	S085_ge	10112	0	20	47	39	37	52	234	180	458	576	353	321	212	880	201	579	54	3	23	78	64	85	84	65	40	86	28	267	34	155	27	5	29	0	51	74	53	70	84	187	30	599
Otu00076	Bacteria	Proteobacteria	Gammaproteobacteria	Betaproteobacteriales	Gallionellaceae	Gallionella	12605	0	1	0	0	0	1	1	84	1162	141	37	5	49	17	26	37	562	8	30	44	27	92	46	56	40	15	3	183	134	305	12	96	1905	63	108	4	2	7	26	46	426	530
Otu00077	Bacteria	Bacteroidetes	Ignavibacteria	Ignavibacteriales	PHOS-HE36	PHOS-HE36_ge	15007	3	1	1	0	3	1	13	20	902	782	877	631	415	811	522	443	147	0	1	0	0	3	44	35	138	551	203	625	88	475	74	28	31	0	1	0	102	208	186	146	326	228
Otu00078	Bacteria	Acidobacteria	Holophagae	Subgroup_7	Subgroup_7_fa	Subgroup_7_ge	11830	1	0	8	14	0	2	176	367	260	640	317	71	129	102	102	12	119	0	2	0	25	272	60	64	198	52	158	276	40	207	196	108	218	0	23	12	234	161	35	47	117	28
Otu00079	Bacteria	Proteobacteria	Alphaproteobacteria	uncultured	uncultured_fa	uncultured_ge	23566	2	83	400	252	213	927	476	399	1041	857	1272	760	439	1049	537	487	139	1	81	191	180	47	156	181	318	240	71	367	90	404	87	16	45	0	271	207	146	96	241	338	143	1546
Otu00080	Bacteria	Proteobacteria	Gammaproteobacteria	Betaproteobacteriales	Nitrosomonadaceae	Ellin6067	9300	225	198	137	70	3	17	14	66	195	57	99	58	61	81	74	146	498	185	90	17	9	29	59	23	10	91	12	91	64	192	33	305	141	366	73	13	22	14	43	98	238	19
Otu00081	Bacteria	Acidobacteria	Acidobacteriia	Solibacterales	Solibacteraceae_(Subgroup_3)	PAUC26f	10189	0	112	253	183	311	172	308	218	332	300	231	244	113	96	86	91	78	4	84	153	89	78	59	80	50	259	128	129	24	96	43	6	15	2	209	128	194	156	37	62	52	66
Otu00082	Bacteria	Actinobacteria	Thermoleophilia	Solirubrobacterales	67-14	67-14_ge	8288	102	141	85	72	202	152	170	140	317	311	249	246	100	148	125	70	52	92	45	174	82	84	67	85	47	129	57	94	55	171	49	20	24	20	26	144	49	33	56	126	27	31
Otu00083	Bacteria	Proteobacteria	Gammaproteobacteria	Betaproteobacteriales	TRA3-20	TRA3-20_ge	13842	1	0	9	25	16	24	68	126	1345	2331	409	167	171	521	643	432	99	1	30	24	13	22	159	69	322	70	68	327	88	102	13	6	36	0	67	13	61	34	86	64	82	198
Otu00084	Bacteria	Proteobacteria	Gammaproteobacteria	Steroidobacterales	Steroidobacteraceae	Steroidobacter	9839	393	877	720	220	146	169	82	15	123	109	167	178	46	85	14	48	20	582	353	126	59	71	12	56	22	67	4	5	0	6	15	19	26	380	159	88	17	11	9	6	18	4
Otu00085	Bacteria	Proteobacteria	Deltaproteobacteria	Desulfuromonadales	Desulfuromonadaceae	Desulfuromusa	16373	0	1	0	0	3	17	28	7	133	350	430	799	319	304	695	251	140	0	0	0	0	3	1	3	120	595	73	736	121	997	118	116	65	0	0	0	7	46	1046	1134	282	155
Otu00086	Bacteria	Proteobacteria	Alphaproteobacteria	Rhizobiales	Rhizobiales_unclassified	Rhizobiales_unclassified	11097	6	128	367	181	488	592	268	178	453	347	228	140	100	171	124	157	67	4	68	514	159	96	114	130	60	75	25	170	50	140	25	5	18	0	81	220	87	32	52	76	45	91
Otu00087	Bacteria	Chloroflexi	KD4-96	KD4-96_or	KD4-96_fa	KD4-96_ge	5238	46	178	52	58	34	39	74	166	254	137	89	220	158	30	28	12	70	38	57	43	22	75	75	50	35	133	96	129	11	16	6	170	54	20	69	16	23	66	11	13	34	11
Otu00088	Bacteria	Proteobacteria	Deltaproteobacteria	Desulfuromonadales	Desulfuromonadaceae	Pelobacter	2681	0	1	3	0	5	5	3	2	19	13	44	25	30	60	131	83	18	0	0	0	0	4	0	1	16	111	8	56	10	84	6	45	14	1	1	0	1	2	160	54	141	17
Otu00089	Bacteria	Bacteroidetes	Bacteroidia	Flavobacteriales	Flavobacteriaceae	Zeaxanthinibacter	12185	1	24	388	478	1060	1238	389	250	360	150	450	584	240	50	69	68	94	1	31	314	35	52	40	70	68	247	1	30	4	120	4	2	7	0	106	89	31	62	50	50	14	27
Otu00090	Bacteria	Acidobacteria	Subgroup_6	Subgroup_6_or	Subgroup_6_fa	Subgroup_6_ge	8604	145	244	190	111	61	87	128	116	263	241	197	239	146	204	281	487	89	86	87	53	30	41	44	45	58	50	99	161	52	180	124	76	123	102	60	16	50	70	57	92	75	42
Otu00091	Bacteria	Gemmatimonadetes	BD2-11_terrestrial_group	BD2-11_terrestrial_group_or	BD2-11_terrestrial_group_fa	BD2-11_terrestrial_group_ge	18487	1	1	9	15	8	26	154	191	761	1304	1200	918	530	580	612	446	202	1	0	7	24	55	156	84	378	792	298	472	121	420	195	23	40	0	66	25	214	254	159	165	78	96
Otu00092	Bacteria	Gemmatimonadetes	S0134_terrestrial_group	S0134_terrestrial_group_or	S0134_terrestrial_group_fa	S0134_terrestrial_group_ge	17383	1	380	551	532	711	477	1079	549	720	915	244	23	129	202	116	38	71	12	104	256	164	140	176	153	344	139	65	139	9	202	79	5	12	3	647	169	297	246	60	61	8	5
Otu00093	Bacteria	Chloroflexi	Dehalococcoidia	SAR202_clade	SAR202_clade_fa	SAR202_clade_ge	10982	0	47	132	80	37	49	274	143	503	478	406	379	301	401	497	518	82	2	27	34	42	73	111	60	82	200	77	237	42	231	23	7	22	1	42	19	61	79	130	178	50	159
Otu00094	Bacteria	Chloroflexi	Dehalococcoidia	S085	S085_fa	S085_ge	7415	19	97	130	88	105	96	155	95	262	295	235	332	223	228	166	133	73	30	66	146	57	44	60	45	41	307	12	109	34	147	25	18	63	9	29	59	29	49	43	78	28	149
Otu00095	Bacteria	Acidobacteria	Subgroup_6	Subgroup_6_or	Subgroup_6_fa	Subgroup_6_ge	8618	344	1131	660	244	149	124	93	117	139	81	54	43	49	20	41	48	37	149	157	75	32	56	77	56	9	63	12	21	2	18	12	5	11	323	234	48	62	83	5	6	23	9
Otu00096	Bacteria	Proteobacteria	Alphaproteobacteria	Rhizobiales	uncultured	uncultured_ge	9791	5	30	80	34	157	281	506	293	569	565	293	82	90	283	168	232	52	9	42	247	231	115	146	174	74	83	11	213	73	147	27	12	28	2	61	107	107	39	64	148	41	506
Otu00097	Archaea	Thaumarchaeota	Nitrososphaeria	Nitrosopumilales	Nitrosopumilaceae	Candidatus_Nitrosoarchaeum	16656	0	1	0	0	0	0	2	1	116	180	23	25	53	1169	932	1408	626	0	0	0	0	1	9	3	12	25	18	609	310	787	136	405	599	0	0	0	0	0	126	225	322	128
Otu00098	Bacteria	Bacteroidetes	Ignavibacteria	Ignavibacteriales	PHOS-HE36	PHOS-HE36_ge	8577	2	65	78	42	256	245	265	316	415	397	139	140	70	124	53	48	53	25	30	116	73	101	94	74	57	100	20	62	9	46	28	185	87	5	81	64	95	68	29	65	98	443
Otu00099	Bacteria	Proteobacteria	Gammaproteobacteria	EPR3968-O8a-Bc78	EPR3968-O8a-Bc78_fa	EPR3968-O8a-Bc78_ge	12225	1	15	61	38	73	112	166	167	618	646	584	525	361	489	483	169	73	1	6	78	28	21	97	45	161	326	137	486	133	535	103	11	16	0	10	28	48	83	185	193	52	102
Otu00100	Bacteria	Proteobacteria	Deltaproteobacteria	Desulfuromonadales	Geobacteraceae	Geobacter	11092	529	577	183	83	55	105	112	547	1131	249	137	62	51	129	223	175	79	168	128	55	44	101	100	105	25	16	6	91	22	34	12	65	64	115	152	45	42	64	37	44	99	101
Otu00101	Bacteria	Gemmatimonadetes	Gemmatimonadetes	Gemmatimonadales	Gemmatimonadaceae	Gemmatimonadaceae_unclassified	6600	0	9	39	22	5	4	361	250	292	172	138	288	309	27	29	6	180	0	11	1	23	33	75	49	55	73	214	118	13	36	8	8	58	3	151	21	157	246	7	14	50	3
Otu00102	Bacteria	Bacteroidetes	Bacteroidia	Bacteroidales	Prolixibacteraceae	WCHB1-32	7496	258	184	99	35	61	73	50	111	169	29	93	38	31	29	72	113	22	383	150	83	32	96	38	62	30	124	0	26	9	155	33	25	12	271	162	42	14	31	84	222	49	40
Otu00103	Bacteria	Proteobacteria	Gammaproteobacteria	Gammaproteobacteria_unclassified	Gammaproteobacteria_unclassified	Gammaproteobacteria_unclassified	4188	0	0	0	0	0	0	0	0	21	50	34	132	11	459	371	537	84	0	0	0	0	0	2	1	12	52	20	125	123	623	187	13	17	0	0	0	0	2	105	25	20	246
Otu00104	Bacteria	Proteobacteria	Deltaproteobacteria	RCP2-54	RCP2-54_fa	RCP2-54_ge	11256	1	43	168	176	51	165	273	225	673	382	516	247	164	127	199	110	77	3	27	109	94	79	129	100	109	548	23	109	12	55	11	9	36	0	111	70	170	25	29	83	14	152
Otu00105	Bacteria	Proteobacteria	Gammaproteobacteria	Pseudomonadales	Pseudomonadaceae	Pseudomonas	1399	0	0	2	1	4	2	1	4	26	24	34	11	20	46	140	54	34	2	6	2	1	2	1	1	2	4	1	20	2	17	0	12	7	6	0	2	1	4	14	17	12	6
Otu00106	Bacteria	Verrucomicrobia	Verrucomicrobiae	Pedosphaerales	Pedosphaeraceae	Pedosphaeraceae_ge	6108	0	6	49	15	81	60	112	72	178	165	237	442	131	56	12	58	59	0	8	44	27	32	23	26	8	1046	8	78	9	44	1	72	38	0	23	54	46	46	17	59	47	102
Otu00107	Bacteria	Proteobacteria	Gammaproteobacteria	CCD24	CCD24_fa	CCD24_ge	12052	180	406	571	192	224	259	136	52	171	85	178	382	291	290	204	287	95	138	115	229	80	37	40	111	14	94	21	65	5	33	27	75	262	253	234	175	47	80	47	68	58	146
Otu00108	Bacteria	Proteobacteria	Alphaproteobacteria	Alphaproteobacteria_unclassified	Alphaproteobacteria_unclassified	Alphaproteobacteria_unclassified	10553	33	251	235	133	155	251	551	463	609	552	194	39	63	134	237	55	29	48	148	134	109	217	204	143	135	88	14	167	75	130	22	11	4	43	104	62	99	25	55	53	13	18
Otu00109	Bacteria	Proteobacteria	Gammaproteobacteria	EPR3968-O8a-Bc78	EPR3968-O8a-Bc78_fa	EPR3968-O8a-Bc78_ge	6351	0	0	0	0	7	6	21	12	112	112	227	588	122	756	143	439	56	0	0	4	3	3	5	2	28	67	27	138	86	381	118	24	25	0	0	2	7	16	70	387	44	315
Otu00110	Bacteria	Proteobacteria	Alphaproteobacteria	Rhizobiales	Xanthobacteraceae	Xanthobacteraceae_unclassified	8258	415	582	813	253	87	126	75	142	208	109	82	235	24	57	55	62	40	212	244	69	22	73	63	56	18	18	6	39	15	38	18	36	67	225	152	40	35	20	17	34	25	19
Otu00111	Bacteria	Proteobacteria	Alphaproteobacteria	Rhodovibrionales	Kiloniellaceae	Kiloniellaceae_unclassified	7582	0	0	0	0	0	0	0	0	60	67	36	46	78	753	501	1049	82	0	0	1	0	0	1	5	27	91	13	289	179	529	132	16	8	0	0	0	0	0	170	339	47	774
Otu00112	Bacteria	Proteobacteria	Gammaproteobacteria	Acidiferrobacterales	Acidiferrobacteraceae	Sulfurifustis	854	0	0	0	0	0	1	3	7	8	17	6	41	18	9	8	7	34	0	0	0	0	0	0	0	10	50	0	6	0	26	0	25	26	0	1	0	2	0	13	19	5	2
Otu00113	Bacteria	Proteobacteria	Deltaproteobacteria	Desulfuromonadales	Desulfuromonadaceae	Desulfuromonas	8289	0	6	27	46	205	194	94	167	359	265	218	213	117	166	229	164	76	1	2	102	17	36	43	34	69	279	15	216	97	241	33	20	18	0	31	33	16	33	121	283	343	103
Otu00114	Bacteria	Gemmatimonadetes	S0134_terrestrial_group	S0134_terrestrial_group_or	S0134_terrestrial_group_fa	S0134_terrestrial_group_ge	6592	0	1	18	5	15	16	128	120	256	272	311	564	214	284	146	266	54	0	1	19	23	35	51	41	83	214	28	136	49	176	27	7	9	0	4	18	42	62	78	101	24	124
Otu00115	Bacteria	Proteobacteria	Gammaproteobacteria	Betaproteobacteriales	Rhodocyclaceae	Azoarcus	12071	0	56	291	331	65	133	112	353	849	269	225	154	105	235	345	176	92	9	50	153	38	100	162	173	73	51	10	104	31	156	12	3	5	0	147	54	176	68	78	133	48	345
Otu00116	Bacteria	Proteobacteria	Deltaproteobacteria	Syntrophobacterales	Syntrophaceae	Desulfobacca	5129	0	0	0	0	0	5	9	8	5	17	20	8	8	59	55	33	17	0	0	2	1	1	1	1	1	18	2	73	5	166	23	442	1099	0	1	3	0	4	19	45	53	202
Otu00117	Bacteria	Actinobacteria	Actinobacteria	Streptomycetales	Streptomycetaceae	Streptomyces	7305	386	245	171	93	109	87	95	151	176	107	112	31	114	217	238	96	21	117	131	52	19	104	46	59	13	63	12	19	2	70	8	5	46	62	126	61	56	19	27	16	58	9
Otu00118	Bacteria	Nitrospirae	2001-04-29	4-29-1_or	4-29-1_fa	4-29-1_ge	7608	0	2	0	0	0	0	11	12	43	41	107	179	173	71	75	21	50	1	2	6	4	22	28	9	17	493	288	552	46	214	42	130	237	0	26	3	20	48	235	54	31	22
Otu00119	Bacteria	Proteobacteria	Deltaproteobacteria	Desulfuromonadales	Desulfuromonadaceae	Desulfuromonas	8481	0	8	29	28	133	193	136	111	265	322	162	120	93	132	192	88	109	2	19	185	26	28	24	45	54	71	11	101	48	190	9	307	21	0	56	72	9	8	164	380	232	182
Otu00120	Bacteria	Actinobacteria	Acidimicrobiia	Actinomarinales	uncultured	uncultured_ge	13919	7	132	418	307	502	233	433	405	745	558	388	604	207	407	205	137	73	15	94	210	78	125	135	105	101	137	49	266	120	298	65	16	24	2	93	46	107	70	180	160	75	113
Otu00121	Bacteria	Proteobacteria	Alphaproteobacteria	Tistrellales	Geminicoccaceae	uncultured	15518	35	263	202	150	337	405	747	396	443	222	631	849	385	26	56	5	80	45	49	285	320	157	153	229	146	620	184	36	20	14	7	0	14	38	104	308	166	174	10	7	8	7
Otu00122	Archaea	Thaumarchaeota	Nitrososphaeria	Nitrososphaerales	Nitrososphaeraceae	Nitrososphaeraceae_ge	8957	0	2	34	15	1	0	188	289	603	525	83	511	338	193	98	10	132	1	18	0	12	78	167	59	51	245	525	422	68	48	15	9	25	0	42	1	126	453	49	23	22	40
Otu00123	Bacteria	Proteobacteria	Gammaproteobacteria	Betaproteobacteriales	Burkholderiaceae	Burkholderiaceae_unclassified	6104	151	32	31	2	4	40	7	11	85	41	78	18	24	38	90	176	149	86	32	10	7	5	7	11	1	1	0	10	2	40	85	36	167	97	50	4	7	8	19	62	26	18
Otu00124	Bacteria	Proteobacteria	Alphaproteobacteria	Rhizobiales	Methyloligellaceae	uncultured	12770	1	48	146	77	88	352	815	450	635	456	328	420	200	116	71	8	111	4	96	307	173	241	268	258	103	535	251	118	50	89	12	32	27	6	67	147	103	218	32	31	25	41
Otu00125	Bacteria	Proteobacteria	Gammaproteobacteria	Gammaproteobacteria_Incertae_Sedis	Unknown_Family	uncultured	10654	0	1	5	2	33	66	196	243	300	360	530	607	362	138	240	353	133	0	0	18	45	68	71	63	145	229	56	236	66	157	30	20	36	0	1	40	53	138	95	158	113	56
Otu00126	Bacteria	Acidobacteria	Holophagae	Subgroup_7	Subgroup_7_fa	Subgroup_7_ge	8000	1	1	10	6	0	0	236	366	507	294	57	94	106	179	118	22	46	0	2	0	22	148	157	92	80	25	263	230	83	107	65	15	40	0	21	17	233	138	19	22	76	95
Otu00127	Archaea	Thaumarchaeota	Nitrososphaeria	Nitrososphaerales	Nitrososphaeraceae	Nitrososphaeraceae_ge	18533	4	198	459	158	114	249	697	720	1164	1008	620	483	268	238	126	14	114	15	166	351	219	446	386	293	170	437	237	228	39	46	10	3	16	12	133	239	262	163	80	47	34	67
Otu00128	Bacteria	Nitrospirae	Thermodesulfovibrionia	uncultured	uncultured_fa	uncultured_ge	9448	0	1	0	1	9	32	28	22	17	214	75	75	78	196	253	21	112	0	0	18	10	20	14	7	31	35	50	242	38	248	59	136	999	2	4	16	16	20	50	49	190	128
Otu00129	Bacteria	Gemmatimonadetes	Gemmatimonadetes	Gemmatimonadales	Gemmatimonadaceae	Gemmatimonadaceae_unclassified	10481	47	455	504	224	903	456	418	192	214	218	514	91	208	16	14	2	96	79	115	183	56	52	58	115	115	44	24	34	3	9	3	14	6	119	230	93	50	19	8	14	4	3
Otu00130	Bacteria	Proteobacteria	Alphaproteobacteria	Azospirillales	Azospirillaceae	Skermanella	6532	1191	477	400	70	63	123	4	0	52	7	129	2	24	0	15	1	7	391	144	39	24	9	2	81	0	0	3	0	4	0	57	0	8	399	51	27	8	1	2	3	5	3
Otu00131	Bacteria	Gemmatimonadetes	PAUC43f_marine_benthic_group	PAUC43f_marine_benthic_group_or	PAUC43f_marine_benthic_group_fa	PAUC43f_marine_benthic_group_ge	19431	1	2	64	40	3289	1860	468	402	513	320	624	603	222	81	171	102	99	1	2	1088	103	73	107	109	78	288	21	53	35	61	14	4	13	0	6	126	19	25	32	33	14	7
Otu00132	Bacteria	Proteobacteria	Deltaproteobacteria	SAR324_clade(Marine_group_B)	SAR324_clade(Marine_group_B)_fa	SAR324_clade(Marine_group_B)_ge	7988	0	0	1	0	0	0	0	0	33	73	193	93	217	637	717	433	60	0	1	0	0	2	0	1	26	152	111	472	131	343	83	36	89	0	0	1	0	8	224	242	114	85
Otu00133	Bacteria	Proteobacteria	Gammaproteobacteria	EPR3968-O8a-Bc78	EPR3968-O8a-Bc78_fa	EPR3968-O8a-Bc78_ge	8923	1	2	161	168	188	124	357	303	440	396	187	337	122	615	115	329	70	0	3	70	42	54	86	62	54	59	22	91	34	247	51	9	31	0	17	62	53	36	44	187	37	126
Otu00134	Bacteria	Actinobacteria	Actinobacteria	Corynebacteriales	Mycobacteriaceae	Mycobacterium	4587	120	209	115	17	17	54	95	85	132	133	70	26	47	241	181	56	27	58	34	27	29	75	39	71	28	16	17	101	30	79	17	17	12	36	42	12	21	17	72	83	34	14
Otu00135	Bacteria	Proteobacteria	Alphaproteobacteria	Rhodovibrionales	Kiloniellaceae	Pelagibius	1116	0	20	28	9	42	23	16	38	29	64	43	23	12	22	13	4	7	1	4	40	12	14	7	10	9	10	0	22	4	14	9	1	4	1	13	18	16	4	9	7	2	5
Otu00136	Bacteria	Gemmatimonadetes	AKAU4049	AKAU4049_or	AKAU4049_fa	AKAU4049_ge	9765	0	12	30	33	4	32	729	582	569	334	152	484	247	75	54	7	126	2	11	13	187	181	160	106	104	75	268	172	23	19	6	0	18	1	31	65	179	256	14	17	10	7
Otu00137	Bacteria	Rokubacteria	NC10	Methylomirabilales	Methylomirabilaceae	Candidatus_Methylomirabilis	6418	0	0	0	0	0	0	0	1	51	28	3	2	8	112	156	99	33	0	0	0	0	0	6	4	2	8	8	133	45	179	63	55	31	1	0	0	0	4	91	94	431	599
Otu00138	Bacteria	Proteobacteria	Gammaproteobacteria	Betaproteobacteriales	Burkholderiaceae	Massilia	4518	151	148	64	47	14	92	10	34	191	30	81	55	40	3	72	200	341	110	33	25	2	36	18	15	4	0	3	5	0	3	347	5	8	31	34	7	7	6	8	6	1	2
Otu00139	Bacteria	Chloroflexi	Anaerolineae	Anaerolineales	Anaerolineaceae	uncultured	7761	1	0	0	0	0	1	0	0	2	25	3	10	3	6	2	8	156	0	1	0	0	0	0	0	0	27	0	106	0	176	0	569	3094	0	0	0	0	0	37	34	73	240
Otu00140	Bacteria	Proteobacteria	Alphaproteobacteria	uncultured	uncultured_fa	uncultured_ge	9618	0	5	20	16	111	161	68	38	179	144	514	397	333	371	646	188	219	0	2	103	17	7	17	16	46	253	37	230	101	473	90	183	134	0	25	31	25	9	116	269	163	86
Otu00141	Archaea	Thaumarchaeota	Nitrososphaeria	Nitrosopumilales	Nitrosopumilaceae	Nitrosopumilaceae_unclassified	11587	0	2	8	1	8	0	1	3	31	77	54	130	86	916	400	593	194	3	0	2	3	1	1	1	23	47	75	537	151	507	99	339	545	5	0	0	0	3	238	678	233	73
Otu00142	Bacteria	Bacteroidetes	Bacteroidia	Cytophagales	Microscillaceae	Chryseolinea	11381	0	0	0	1	1	0	1	8	147	244	298	864	379	719	528	561	169	0	0	0	0	1	4	2	89	372	104	379	68	429	215	45	71	0	10	0	9	19	218	250	77	218
Otu00143	Bacteria	Bacteroidetes	Bacteroidia	Bacteroidales	Marinilabiliaceae	Geofilum	14755	0	0	0	0	0	0	1	0	1	6	1	0	0	0	1	14	3	0	0	0	0	0	0	0	0	142	0	273	1	143	2	12	81	0	2	0	0	0	126	210	85	16
Otu00144	Bacteria	Proteobacteria	Alphaproteobacteria	Sphingomonadales	Sphingomonadaceae	Altererythrobacter	6865	385	297	265	125	82	135	123	73	120	107	158	190	106	157	123	82	50	110	94	50	11	15	22	30	23	44	5	12	17	35	19	11	84	234	66	30	21	28	21	29	125	13
Otu00145	Bacteria	Bacteroidetes	Bacteroidia	Cytophagales	Cyclobacteriaceae	uncultured	12321	1	0	0	0	1	0	0	1	7	11	260	204	85	189	62	158	438	0	0	0	0	0	0	0	35	155	13	89	23	210	36	1851	479	0	0	0	0	9	335	365	349	27
Otu00146	Bacteria	Firmicutes	Clostridia	Clostridiales	Ruminococcaceae	Ruminococcaceae_unclassified	2036	5	15	1	1	31	44	41	26	36	49	56	113	70	44	32	5	17	21	6	23	12	31	19	12	11	77	53	12	18	7	15	5	50	76	32	21	21	10	5	13	7	10
Otu00147	Bacteria	Acidobacteria	Subgroup_6	Subgroup_6_or	Subgroup_6_fa	Subgroup_6_ge	6890	62	195	128	48	102	106	192	155	202	274	192	207	108	98	108	70	27	54	77	112	65	70	92	64	52	126	29	69	4	21	16	14	7	80	53	62	98	94	21	31	12	75
Otu00148	Bacteria	Acidobacteria	Subgroup_6	Subgroup_6_or	Subgroup_6_fa	Subgroup_6_ge	4613	16	120	164	206	103	99	142	130	162	46	34	17	18	2	16	3	14	42	91	93	49	61	56	36	16	16	9	6	5	10	4	5	24	34	96	70	43	46	5	5	5	2
Otu00149	Bacteria	Gemmatimonadetes	BD2-11_terrestrial_group	BD2-11_terrestrial_group_or	BD2-11_terrestrial_group_fa	BD2-11_terrestrial_group_ge	3143	16	90	67	67	52	32	94	72	149	124	67	65	47	53	69	91	45	6	17	23	9	20	42	17	12	52	21	79	25	74	19	15	13	31	43	10	19	23	19	29	21	11
Otu00150	Bacteria	Chloroflexi	Anaerolineae	Anaerolineales	Anaerolineaceae	uncultured	4179	0	10	9	7	1	7	65	35	60	62	143	427	139	67	118	8	122	5	17	9	20	17	19	23	29	126	67	90	8	138	19	23	16	4	4	15	38	30	37	36	38	14
Otu00151	Bacteria	Proteobacteria	Gammaproteobacteria	Betaproteobacteriales	Gallionellaceae	Gallionella	6671	0	0	0	0	0	0	0	1	7	0	0	1	0	0	3	17	489	0	0	0	0	0	0	1	0	6	0	19	11	6	0	140	21	0	0	0	0	0	10	15	249	10
Otu00152	Bacteria	Acidobacteria	Subgroup_6	Subgroup_6_or	Subgroup_6_fa	Subgroup_6_ge	3959	10	54	34	10	118	40	154	136	253	98	65	63	52	14	12	3	16	25	29	48	37	50	96	61	56	27	84	77	8	2	3	0	6	38	75	37	32	106	8	5	5	1
Otu00153	Bacteria	Chloroflexi	Anaerolineae	Ardenticatenales	uncultured	uncultured_ge	8366	1	23	47	17	50	32	89	55	168	134	445	1069	228	388	472	241	47	0	6	9	10	14	24	13	52	205	12	202	28	262	13	8	15	0	5	5	8	20	145	202	32	224
Otu00154	Bacteria	Acidobacteria	Thermoanaerobaculia	Thermoanaerobaculales	Thermoanaerobaculaceae	Subgroup_10	7771	0	91	94	145	103	135	276	137	408	139	248	149	162	197	135	59	72	5	66	84	81	110	130	75	78	87	115	103	32	116	151	2	13	0	41	58	101	143	55	53	66	11
Otu00155	Bacteria	Chloroflexi	Anaerolineae	Anaerolineales	Anaerolineaceae	uncultured	10665	0	6	22	3	2	3	196	207	331	368	113	279	306	190	450	104	257	0	11	4	40	124	106	51	35	32	826	328	62	422	222	266	187	1	17	40	51	143	93	186	185	51
Otu00156	Bacteria	Actinobacteria	Actinobacteria	Propionibacteriales	Nocardioidaceae	Marmoricola	7500	434	564	163	53	24	89	61	62	122	59	117	9	11	8	26	4	23	366	230	50	24	58	47	74	5	2	4	1	3	4	42	3	15	300	83	19	14	7	2	5	13	4
Otu00157	Bacteria	Acidobacteria	Subgroup_6	Subgroup_6_or	Subgroup_6_fa	Subgroup_6_ge	7508	326	291	222	141	72	85	142	227	318	216	78	30	52	45	36	209	45	126	137	45	31	116	109	62	34	41	46	42	12	39	22	33	25	334	209	27	135	117	13	21	16	4
Otu00158	Bacteria	Chloroflexi	Anaerolineae	Anaerolineales	Anaerolineaceae	uncultured	7261	0	0	0	0	0	0	0	0	4	8	59	125	488	517	749	156	32	0	0	0	1	0	0	0	12	170	100	268	34	669	64	10	23	0	0	0	0	0	346	183	32	49
Otu00159	Bacteria	Firmicutes	Bacilli	Bacillales	Planococcaceae	Planococcaceae_unclassified	4597	18	28	50	12	97	128	82	57	130	78	90	135	60	44	48	4	29	311	77	45	71	140	102	103	53	28	14	7	13	7	37	8	68	6	51	20	36	17	6	6	6	7
Otu00160	Bacteria	Bacteroidetes	Bacteroidia	Flavobacteriales	Flavobacteriaceae	Mariniflexile	5990	0	0	0	0	8	11	40	22	83	37	183	55	176	64	264	269	55	0	0	1	1	4	0	0	11	21	3	21	4	96	1	52	14	1	0	1	2	13	73	83	408	51
Otu00161	Bacteria	Verrucomicrobia	Verrucomicrobiae	Pedosphaerales	Pedosphaeraceae	Pedosphaeraceae_ge	4465	7	16	32	12	29	11	9	28	110	119	236	246	120	121	78	83	58	13	17	24	4	9	18	13	15	127	5	87	13	57	3	144	121	2	20	7	13	27	59	41	33	42
Otu00162	Bacteria	Proteobacteria	Gammaproteobacteria	Betaproteobacteriales	Burkholderiaceae	Xylophilus	6149	128	67	66	48	15	24	16	153	329	90	56	11	31	63	118	189	34	98	43	23	10	121	151	58	17	7	5	55	20	75	23	43	95	231	154	23	30	7	16	30	23	10
Otu00163	Bacteria	Proteobacteria	Gammaproteobacteria	Betaproteobacteriales	Burkholderiaceae	Burkholderiaceae_unclassified	4943	359	336	97	30	16	33	12	21	49	68	67	14	12	5	24	11	9	188	85	21	9	10	5	19	1	2	5	7	1	1	33	1	9	196	58	2	5	5	4	5	3	6
Otu00164	Bacteria	Bacteroidetes	Bacteroidia	Flavobacteriales	Flavobacteriaceae	Flavobacterium	7933	140	30	12	10	13	29	71	156	345	336	75	72	36	107	528	1857	91	2	5	3	9	63	38	15	17	10	67	50	21	33	6	2	12	8	46	18	42	50	13	33	15	14
Otu00165	Bacteria	Proteobacteria	Deltaproteobacteria	Sva0485	Sva0485_fa	Sva0485_ge	4631	0	0	0	0	0	0	0	0	5	3	1	0	5	2	6	16	24	0	0	0	1	0	1	0	0	23	0	164	0	311	3	62	295	0	0	0	0	2	35	35	31	503
Otu00166	Bacteria	Bacteroidetes	Bacteroidia	Bacteroidales	Prolixibacteraceae	Sunxiuqinia	6515	1	0	0	1	10	7	15	12	16	38	235	399	94	112	135	278	88	0	0	7	2	6	3	4	25	130	27	88	71	323	38	57	20	0	3	5	3	11	130	601	171	46
Otu00167	Bacteria	Firmicutes	Bacilli	Bacillales	Bacillales_unclassified	Bacillales_unclassified	4062	10	35	196	51	136	166	54	77	184	76	85	178	96	58	58	11	44	17	26	47	46	111	56	49	39	20	24	9	18	18	9	10	57	31	29	74	33	29	12	4	11	9
Otu00168	Bacteria	Proteobacteria	Deltaproteobacteria	Myxococcales	Archangiaceae	Anaeromyxobacter	7578	87	299	215	67	80	44	19	33	50	19	332	251	133	30	46	22	113	70	60	62	17	15	8	20	12	338	26	77	11	144	12	127	327	123	276	265	19	15	24	20	141	29
Otu00169	Bacteria	Chloroflexi	Chloroflexia	Thermomicrobiales	JG30-KF-CM45	JG30-KF-CM45_ge	7333	258	515	237	180	32	54	83	81	117	74	91	78	53	23	49	11	28	376	168	50	26	71	48	43	29	41	31	25	8	35	13	15	46	153	139	48	30	13	6	17	13	11
Otu00170	Bacteria	Proteobacteria	Alphaproteobacteria	Sphingomonadales	Sphingomonadaceae	Sphingomonas	5230	985	601	144	57	14	77	203	109	148	20	145	3	30	3	24	8	23	148	111	22	14	15	11	27	3	1	2	9	0	3	5	2	19	385	44	13	26	4	5	2	4	4
Otu00171	Bacteria	Proteobacteria	Alphaproteobacteria	Tistrellales	Geminicoccaceae	uncultured	13947	6	71	130	62	69	150	867	281	369	247	832	932	543	43	116	4	145	11	34	137	194	86	138	211	233	211	323	90	25	84	38	9	10	12	79	174	236	263	31	23	9	10
Otu00172	Bacteria	Proteobacteria	Deltaproteobacteria	NB1-j	NB1-j_fa	NB1-j_ge	5294	1	0	0	1	3	18	74	92	380	283	412	230	190	23	82	47	73	1	0	16	9	17	68	29	106	153	36	50	13	30	8	9	21	0	11	67	142	68	14	12	7	7
Otu00173	Bacteria	Proteobacteria	Alphaproteobacteria	Rhizobiales	Methyloligellaceae	Methyloligellaceae_unclassified	8625	95	78	91	59	154	540	443	228	331	234	229	189	115	50	41	10	62	70	72	308	172	77	88	150	57	215	73	63	19	25	14	21	58	67	31	311	85	45	31	34	16	29
Otu00174	Bacteria	Planctomycetes	Planctomycetacia	Pirellulales	Pirellulaceae	Pir4_lineage	3762	5	37	55	22	83	100	94	95	238	128	159	196	68	116	67	19	26	10	26	91	50	50	63	54	29	67	43	32	20	48	27	3	5	5	18	34	19	19	19	46	3	20
Otu00175	Bacteria	Actinobacteria	Acidimicrobiia	Microtrichales	Ilumatobacteraceae	Ilumatobacteraceae_unclassified	7633	100	296	182	181	85	69	245	198	158	121	215	313	103	82	70	13	16	90	100	134	75	134	91	106	56	99	69	46	25	32	11	4	9	81	154	199	96	67	0	2	4	6
Otu00176	Bacteria	Proteobacteria	Alphaproteobacteria	Rhizobiales	Rhizobiales_Incertae_Sedis	Bauldia	7465	3	15	34	16	56	53	87	94	328	276	168	152	109	282	222	369	189	7	7	44	18	48	63	40	37	92	26	239	103	279	62	156	320	0	14	36	15	15	104	162	188	116
Otu00177	Bacteria	Acidobacteria	Acidobacteriia	Solibacterales	Solibacteraceae_(Subgroup_3)	PAUC26f	6445	0	0	2	9	2	5	40	84	117	323	271	299	153	215	197	137	19	0	0	4	13	9	12	11	54	227	106	167	41	138	60	4	9	0	4	4	43	74	63	129	43	285
Otu00178	Bacteria	Actinobacteria	Thermoleophilia	Solirubrobacterales	67-14	67-14_ge	5392	116	249	122	82	21	29	184	232	185	120	62	186	92	78	32	6	22	56	67	50	37	95	78	55	21	218	51	95	18	31	8	9	19	57	61	49	32	89	16	10	10	9
Otu00179	Bacteria	Chloroflexi	Anaerolineae	Anaerolineales	Anaerolineaceae	uncultured	3925	0	0	0	2	0	0	2	3	18	17	49	33	37	18	12	6	73	0	0	0	0	2	0	1	8	18	29	93	10	45	0	162	591	0	1	0	23	15	11	10	88	43
Otu00180	Bacteria	Actinobacteria	Thermoleophilia	Solirubrobacterales	67-14	67-14_ge	3988	72	238	152	67	153	107	74	69	59	41	39	91	24	15	5	3	9	38	103	221	68	99	40	82	7	122	15	7	5	2	4	0	3	41	50	134	6	6	1	1	2	1
Otu00181	Bacteria	Bacteroidetes	Bacteroidia	Cytophagales	Microscillaceae	Microscillaceae_unclassified	7778	118	372	187	75	272	151	218	196	319	201	162	96	80	41	71	20	27	332	63	158	43	55	35	51	37	79	64	71	8	68	16	3	8	278	70	18	29	21	25	15	2	7
Otu00182	Bacteria	Proteobacteria	Gammaproteobacteria	Betaproteobacteriales	Nitrosomonadaceae	GOUTA6	4699	0	0	0	0	0	1	0	9	27	8	7	8	8	15	13	128	318	1	0	0	2	12	12	3	1	3	0	74	16	45	5	487	372	0	22	2	1	5	19	52	493	251
Otu00183	Bacteria	Proteobacteria	Gammaproteobacteria	Chromatiales	Sedimenticolaceae	Sedimenticola	9178	0	0	0	2	2	10	19	10	88	52	549	725	205	172	706	109	135	0	1	1	2	0	0	4	81	892	55	242	29	312	36	21	12	0	0	2	2	46	205	226	158	184
Otu00184	Bacteria	Planctomycetes	Phycisphaerae	Tepidisphaerales	WD2101_soil_group	WD2101_soil_group_ge	6183	115	354	262	181	496	106	16	3	25	9	232	332	150	7	6	0	50	116	109	144	9	6	6	7	8	201	22	4	0	6	7	0	9	156	108	93	30	23	2	1	1	0
Otu00185	Bacteria	Actinobacteria	Thermoleophilia	Solirubrobacterales	67-14	67-14_ge	4331	1	59	71	63	15	21	172	138	153	132	81	261	118	38	49	4	57	1	65	33	39	97	55	51	30	192	96	143	22	27	6	10	10	2	76	27	47	58	11	16	13	3
Otu00186	Bacteria	Proteobacteria	Deltaproteobacteria	RCP2-54	RCP2-54_fa	RCP2-54_ge	18680	84	462	175	105	1045	574	238	183	371	106	761	673	200	73	91	23	89	183	196	691	164	82	85	151	22	1359	27	36	7	24	25	78	146	161	112	301	68	37	12	30	13	9
Otu00187	Bacteria	Chloroflexi	Anaerolineae	Ardenticatenales	uncultured	uncultured_ge	4580	0	0	0	0	0	1	3	8	32	68	97	162	110	159	343	549	57	1	0	0	0	3	1	1	24	79	13	209	43	264	31	2	8	0	0	0	0	4	111	211	25	176
Otu00188	Bacteria	Planctomycetes	Planctomycetacia	Pirellulales	Pirellulaceae	Pir4_lineage	4372	1	33	46	35	280	207	180	111	134	56	42	52	24	1	12	1	17	0	26	210	99	82	57	90	20	56	14	2	0	0	3	1	1	0	65	170	53	18	2	3	1	6
Otu00189	Bacteria	Acidobacteria	Subgroup_6	Subgroup_6_or	Subgroup_6_fa	Subgroup_6_ge	4468	5	191	77	58	46	79	145	55	86	32	70	19	14	6	10	4	29	35	104	80	35	37	48	50	16	14	6	12	0	19	10	107	183	87	236	54	54	10	8	9	7	3
Otu00190	Bacteria	Chloroflexi	Anaerolineae	Anaerolineales	Anaerolineaceae	uncultured	5129	1	11	6	10	5	7	59	105	240	301	153	80	195	163	215	173	57	2	2	7	13	85	38	23	91	105	81	266	41	109	28	6	44	0	14	2	20	33	44	48	79	8
Otu00191	Bacteria	Chloroflexi	Gitt-GS-136	Gitt-GS-136_or	Gitt-GS-136_fa	Gitt-GS-136_ge	7927	43	342	263	193	94	125	159	330	681	187	94	38	42	17	26	2	31	57	117	131	76	311	329	195	61	49	20	35	24	10	7	0	6	23	82	71	52	37	10	3	7	2
Otu00192	Bacteria	Chloroflexi	Anaerolineae	Ardenticatenales	uncultured	uncultured_ge	3829	0	1	11	7	4	8	40	39	49	113	149	225	104	276	103	136	24	0	0	3	5	6	4	8	23	62	3	77	15	98	6	4	9	0	1	2	5	12	56	81	37	98
Otu00193	Bacteria	Actinobacteria	Actinobacteria	Micromonosporales	Micromonosporaceae	Longispora	7611	3	553	1275	461	1338	239	72	39	76	54	21	8	9	1	3	2	20	10	101	255	33	10	5	51	6	1	0	0	1	2	0	1	1	0	189	39	28	13	1	10	1	0
Otu00194	Bacteria	Bacteroidetes	Bacteroidia	Flavobacteriales	Flavobacteriaceae	Flavobacterium	2768	35	28	12	1	160	15	16	7	35	82	19	14	16	17	99	387	29	0	1	0	0	2	3	2	1	1	0	4	1	2	0	0	3	4	1	1	3	5	5	25	4	6
Otu00195	Bacteria	Proteobacteria	Alphaproteobacteria	Rhodobacterales	Rhodobacteraceae	Rhodobacteraceae_unclassified	10731	0	0	0	1	0	0	1	1	26	55	639	341	247	253	876	789	447	0	0	0	0	0	0	3	36	56	10	173	608	649	91	15	212	0	0	0	0	0	63	81	192	44
Otu00196	Bacteria	Proteobacteria	Gammaproteobacteria	Betaproteobacteriales	Nitrosomonadaceae	MND1	2400	9	83	29	34	11	16	34	20	112	28	29	38	26	16	20	5	13	18	30	12	16	10	31	19	7	91	9	95	5	12	0	2	6	53	33	12	27	11	7	9	2	3
Otu00197	Bacteria	Proteobacteria	Alphaproteobacteria	Rhizobiales	Rhizobiales_Incertae_Sedis	Nordella	4957	1	20	32	40	2	12	121	217	279	206	239	142	82	56	41	8	62	1	36	7	16	82	129	52	37	210	80	252	13	38	1	17	25	2	68	18	55	32	23	9	9	10
Otu00198	Bacteria	Proteobacteria	Alphaproteobacteria	Rhodovibrionales	Kiloniellaceae	Pelagibius	5371	0	0	0	0	0	0	3	7	42	84	157	244	141	160	398	115	17	0	0	0	1	0	16	1	26	70	2	43	8	142	2	3	6	0	0	1	3	15	71	113	151	32
Otu00199	Bacteria	Dadabacteria	Dadabacteriia	Dadabacteriales	Dadabacteriales_fa	Dadabacteriales_ge	6076	0	0	2	2	1	1	24	42	392	423	43	19	88	294	420	46	17	0	0	0	0	11	83	26	46	11	682	319	106	162	321	8	12	0	6	0	17	65	122	86	174	27
Otu00200	Bacteria	Actinobacteria	Thermoleophilia	Gaiellales	uncultured	uncultured_ge	4657	27	121	50	30	56	42	312	144	167	158	196	68	33	3	23	0	26	36	48	112	73	67	42	70	24	109	17	13	4	14	0	0	3	21	40	115	45	20	8	2	3	3
Otu00201	Bacteria	Proteobacteria	Gammaproteobacteria	Steroidobacterales	Steroidobacteraceae	uncultured	3602	2	8	6	15	0	7	57	58	74	105	195	413	104	16	8	0	10	0	2	2	25	20	34	20	78	644	31	13	1	5	3	3	7	4	16	7	73	70	4	3	3	3
Otu00202	Bacteria	Proteobacteria	Deltaproteobacteria	Syntrophobacterales	Syntrophobacteraceae	Syntrophobacteraceae_unclassified	5560	232	572	105	2	17	16	2	61	113	1	30	2	4	0	6	4	6	406	232	34	5	15	3	18	1	2	3	0	1	1	7	0	1	517	44	6	3	1	4	4	13	6
Otu00203	Bacteria	Actinobacteria	Actinobacteria	Streptomycetales	Streptomycetaceae	Streptomyces	4525	3	97	45	20	86	19	17	4	8	6	244	324	39	7	11	0	17	12	67	81	5	8	15	10	9	568	0	6	0	5	2	25	5	2	20	21	2	0	2	2	0	8
Otu00204	Bacteria	Bacteroidetes	Bacteroidia	Cytophagales	Microscillaceae	uncultured	6577	85	359	673	623	279	148	77	59	6	2	14	90	2	0	0	0	35	21	122	221	20	33	16	45	0	51	0	0	0	0	6	0	1	39	375	98	43	34	14	0	6	0
Otu00205	Bacteria	Acidobacteria	Holophagae	Subgroup_7	Subgroup_7_fa	Subgroup_7_ge	4553	0	0	0	0	0	0	0	0	15	19	18	14	19	38	63	67	201	1	0	0	0	0	1	1	20	11	6	47	2	158	56	194	240	0	0	0	0	0	94	124	177	28
Otu00206	Bacteria	Acidobacteria	Subgroup_9	Subgroup_9_or	Subgroup_9_fa	Subgroup_9_ge	4903	0	0	1	2	1	1	22	49	81	147	44	188	111	127	229	218	46	0	0	0	6	7	16	6	22	137	67	68	6	46	31	25	46	0	1	2	28	38	26	33	301	170
Otu00207	Bacteria	Chloroflexi	Anaerolineae	SBR1031	SBR1031_fa	SBR1031_ge	3912	0	0	0	0	0	0	0	0	24	21	128	147	185	141	246	84	47	0	0	0	0	0	1	0	12	70	36	216	13	181	53	4	17	0	0	0	0	12	49	38	47	19
Otu00208	Bacteria	Actinobacteria	Thermoleophilia	uncultured	uncultured_fa	uncultured_ge	4542	1	8	15	6	11	15	187	192	254	206	125	140	121	66	90	7	76	1	21	11	29	146	85	69	54	98	58	88	24	53	15	11	42	10	32	35	44	39	33	15	24	15
Otu00209	Bacteria	Acidobacteria	Subgroup_6	Subgroup_6_or	Subgroup_6_fa	Subgroup_6_ge	8017	0	4	8	7	68	40	109	208	444	515	483	310	151	147	163	163	35	0	0	35	45	86	87	59	173	215	51	122	59	127	48	5	8	0	21	50	135	135	22	25	17	20
Otu00210	Bacteria	Verrucomicrobia	Verrucomicrobiae	Pedosphaerales	Pedosphaeraceae	Pedosphaeraceae_ge	3352	42	88	54	48	248	64	32	67	133	52	43	97	18	2	3	2	30	54	62	73	11	41	29	24	3	15	0	0	2	2	0	169	42	79	43	42	15	20	12	10	4	7
Otu00211	Bacteria	Actinobacteria	Acidimicrobiia	Actinomarinales	uncultured	uncultured_ge	9011	65	91	78	61	20	20	140	318	607	636	543	219	172	212	194	32	76	26	52	22	25	175	132	96	153	142	97	184	32	153	13	11	27	20	74	30	115	74	41	48	29	41
Otu00212	Bacteria	Proteobacteria	Alphaproteobacteria	Tistrellales	Geminicoccaceae	uncultured	5349	7	51	36	16	56	137	230	158	209	115	326	387	106	3	14	2	23	17	15	81	86	71	71	66	57	313	53	6	6	4	2	0	2	11	26	92	53	80	4	3	5	4
Otu00213	Bacteria	Proteobacteria	Gammaproteobacteria	Betaproteobacteriales	TRA3-20	TRA3-20_ge	4959	36	164	73	17	32	24	9	30	127	104	174	70	108	130	186	312	84	75	63	28	3	3	13	4	17	33	16	179	29	221	20	21	25	41	10	9	1	0	84	120	107	24
Otu00214	Bacteria	Proteobacteria	Gammaproteobacteria	Ectothiorhodospirales	Thioalkalispiraceae	Thioalkalispira	1112	0	0	0	0	2	4	6	5	121	35	13	7	18	0	0	5	73	0	0	3	1	0	3	2	0	0	0	2	3	11	0	6	7	0	0	0	0	0	12	22	22	1
Otu00215	Bacteria	Chloroflexi	Dehalococcoidia	S085	S085_fa	S085_ge	2150	7	35	33	31	23	30	59	33	103	81	85	43	47	41	49	69	22	4	7	24	12	14	32	12	14	68	7	39	10	15	9	3	13	7	17	18	16	25	7	13	7	26
Otu00216	Bacteria	Proteobacteria	Deltaproteobacteria	Myxococcales	Haliangiaceae	Haliangium	3511	128	97	106	26	47	35	7	15	24	19	54	181	373	12	24	22	40	78	45	45	23	23	39	20	5	8	12	19	3	36	9	12	159	89	42	42	16	8	6	8	6	8
Otu00217	Bacteria	Actinobacteria	Acidimicrobiia	Actinomarinales	uncultured	uncultured_ge	10467	0	4	6	16	0	0	18	38	1040	2838	1227	52	215	74	63	16	45	1	2	6	5	24	109	58	444	54	39	176	81	55	0	2	9	1	2	9	156	188	45	31	26	49
Otu00218	Bacteria	Gemmatimonadetes	Gemmatimonadetes	Gemmatimonadales	Gemmatimonadaceae	uncultured	5703	1	120	56	31	58	38	57	55	140	252	294	217	186	79	130	178	75	9	30	30	8	16	17	24	61	127	18	79	7	31	4	24	61	16	27	30	100	76	20	26	40	42
Otu00219	Bacteria	Proteobacteria	Alphaproteobacteria	Rhizobiales	Amb-16S-1323	Amb-16S-1323_ge	8152	1	158	214	56	230	521	344	258	390	354	185	327	96	301	70	125	39	13	77	168	59	55	49	81	58	133	30	81	74	67	55	12	31	0	36	160	53	38	41	89	15	231
Otu00220	Bacteria	Actinobacteria	Actinobacteria	Micromonosporales	Micromonosporaceae	Longispora	5407	0	2	13	5	356	114	2	2	31	48	579	610	202	6	10	2	13	0	2	106	2	0	0	1	60	1010	2	1	0	3	1	2	2	0	0	39	3	17	1	0	1	1
Otu00221	Bacteria	Acidobacteria	Subgroup_5	Subgroup_5_or	Subgroup_5_fa	Subgroup_5_ge	4767	0	5	36	20	146	93	62	34	96	110	241	501	124	324	94	182	19	0	3	114	28	14	21	22	13	105	40	68	13	91	27	1	2	1	0	14	7	10	47	119	17	197
Otu00222	Bacteria	Gemmatimonadetes	S0134_terrestrial_group	S0134_terrestrial_group_or	S0134_terrestrial_group_fa	S0134_terrestrial_group_ge	5698	19	144	654	361	52	47	184	180	269	59	123	33	58	13	12	6	31	3	110	65	65	97	68	51	31	46	6	5	2	3	4	3	7	20	120	33	44	8	6	3	4	2
Otu00223	Bacteria	Gemmatimonadetes	Gemmatimonadetes	Gemmatimonadales	Gemmatimonadaceae	uncultured	4914	0	0	0	0	0	0	0	0	24	37	34	12	47	131	188	371	76	0	0	0	0	0	1	2	11	10	31	236	133	310	92	139	229	0	0	0	0	8	42	34	103	103
Otu00224	Bacteria	Bacteroidetes	Bacteroidia	Chitinophagales	Chitinophagaceae	Ferruginibacter	2756	629	73	20	1	4	71	0	3	90	38	164	5	15	2	23	24	16	155	48	12	4	2	1	9	0	0	1	1	1	0	9	0	8	254	20	3	1	4	1	3	4	4
Otu00225	Bacteria	Proteobacteria	Alphaproteobacteria	Sphingomonadales	Sphingomonadaceae	Ellin6055	2247	306	150	51	18	12	40	5	7	36	31	71	2	10	0	10	10	13	156	96	21	2	2	4	2	1	0	0	1	0	1	1	0	8	146	30	3	2	0	4	2	5	2
Otu00226	Bacteria	Actinobacteria	MB-A2-108	MB-A2-108_or	MB-A2-108_fa	MB-A2-108_ge	3281	0	7	50	96	1	3	103	100	337	175	79	28	36	24	27	24	38	0	23	5	7	33	90	45	47	5	32	84	14	30	3	34	83	0	63	10	50	2	18	13	15	18
Otu00227	Bacteria	Bacteroidetes	Bacteroidia	Flavobacteriales	Crocinitomicaceae	Crocinitomicaceae_unclassified	3933	0	6	10	5	41	68	203	124	287	261	134	64	40	68	88	92	32	0	1	5	10	17	14	6	24	70	28	178	39	48	1	27	45	0	12	5	36	19	36	63	24	14
Otu00228	Bacteria	Proteobacteria	Gammaproteobacteria	Betaproteobacteriales	Burkholderiaceae	Burkholderiaceae_unclassified	3830	83	225	143	78	51	40	65	73	88	38	61	21	13	4	10	35	4	42	108	41	19	55	36	35	2	24	5	0	0	0	359	3	7	103	62	31	39	17	4	7	4	5
Otu00229	Bacteria	Planctomycetes	Planctomycetacia	Pirellulales	Pirellulaceae	Pir4_lineage	3385	150	246	163	51	157	74	11	37	40	18	42	22	6	8	9	2	18	157	121	123	11	32	18	18	4	3	2	3	2	5	4	22	21	113	69	44	7	9	3	8	6	1
Otu00230	Bacteria	Proteobacteria	Gammaproteobacteria	Gammaproteobacteria_Incertae_Sedis	Unknown_Family	uncultured	7275	0	0	0	0	0	2	17	42	275	241	350	411	351	217	383	188	137	1	0	0	3	4	19	13	59	100	75	330	102	414	129	16	16	0	0	0	0	51	103	136	84	23
Otu00231	Bacteria	Proteobacteria	Alphaproteobacteria	Rhizobiales	Rhizobiales_Incertae_Sedis	Bauldia	7611	23	41	62	28	99	139	245	113	226	195	270	190	136	158	208	162	177	18	26	87	43	65	71	48	46	149	16	195	37	177	21	115	90	12	45	101	39	29	69	145	147	6
Otu00232	Bacteria	Proteobacteria	Gammaproteobacteria	Betaproteobacteriales	Gallionellaceae	Gallionellaceae_unclassified	5886	0	0	0	0	0	0	0	49	347	44	7	5	16	24	27	25	54	0	0	6	3	12	6	10	6	7	1	76	87	111	16	96	204	1	3	0	0	1	13	16	1265	80
Otu00233	Bacteria	Chloroflexi	Anaerolineae	SBR1031	A4b	A4b_ge	7509	0	2	13	6	33	69	79	75	282	293	412	913	233	348	93	238	110	0	1	4	14	18	16	28	57	253	26	295	25	190	71	3	26	0	0	21	18	22	120	146	55	161
Otu00234	Bacteria	Proteobacteria	Gammaproteobacteria	Betaproteobacteriales	TRA3-20	TRA3-20_ge	4842	173	375	115	48	75	67	134	135	75	14	35	19	17	22	15	7	9	170	210	66	34	69	57	42	2	32	9	10	6	12	12	7	4	211	60	36	13	2	1	1	2	3
Otu00235	Bacteria	Proteobacteria	Gammaproteobacteria	Betaproteobacteriales	TRA3-20	TRA3-20_ge	6719	0	19	175	243	28	20	43	188	448	140	156	64	56	99	128	103	72	1	42	14	19	110	226	100	39	74	22	105	26	143	29	98	67	0	116	11	95	66	23	23	32	12
Otu00236	Bacteria	Proteobacteria	Alphaproteobacteria	Rhizobiales	Rhodomicrobiaceae	Rhodomicrobium	9611	1	9	25	4	735	1841	452	248	297	209	340	80	51	76	16	11	39	1	7	454	232	66	78	181	52	156	5	6	3	9	4	0	29	7	9	246	103	30	6	20	7	97
Otu00237	Bacteria	Acidobacteria	Subgroup_6	Subgroup_6_or	Subgroup_6_fa	Subgroup_6_ge	3777	298	343	288	194	72	78	192	43	75	19	52	33	13	12	11	14	7	59	64	30	48	18	8	31	13	10	4	0	2	13	9	1	2	104	115	18	19	17	0	1	1	1
Otu00238	Bacteria	Planctomycetes	Planctomycetacia	Isosphaerales	Isosphaeraceae	uncultured	3169	345	291	150	44	40	20	6	14	20	1	20	5	4	0	7	1	3	371	100	40	12	42	20	28	0	0	2	0	2	0	8	0	2	170	31	20	7	3	0	0	2	0
Otu00239	Bacteria	Chloroflexi	Anaerolineae	Anaerolineales	Anaerolineaceae	uncultured	5512	0	0	0	0	0	1	2	12	232	120	121	137	184	306	314	290	50	0	0	0	0	2	21	11	12	37	26	280	51	286	41	7	9	0	0	0	1	22	127	91	218	42
Otu00240	Bacteria	Actinobacteria	Actinobacteria	Pseudonocardiales	Pseudonocardiaceae	Pseudonocardia	4282	706	326	190	67	44	81	27	13	96	16	145	3	10	4	20	1	12	147	80	33	15	16	15	18	3	10	6	0	4	5	17	2	6	210	130	17	8	2	4	1	3	1
Otu00241	Bacteria	Actinobacteria	Thermoleophilia	Gaiellales	uncultured	uncultured_ge	2623	8	48	41	21	20	23	88	97	112	152	95	85	45	43	70	17	35	11	7	19	20	27	21	17	19	74	35	57	15	48	8	29	27	6	13	26	19	13	12	10	11	6
Otu00242	Bacteria	Proteobacteria	Deltaproteobacteria	Desulfuromonadales	Geobacteraceae	Geobacter	6225	0	8	8	7	9	27	17	67	305	114	70	38	85	54	206	42	151	13	25	34	17	33	21	30	24	98	20	69	19	149	33	32	90	9	125	58	71	137	43	54	133	72
Otu00243	Bacteria	Chloroflexi	Anaerolineae	SBR1031	SBR1031_fa	SBR1031_ge	4496	0	17	16	7	16	8	52	36	38	67	154	1398	580	113	26	1	1	0	0	20	9	19	3	19	4	405	9	17	3	6	0	0	6	0	3	19	27	4	6	0	3	36
Otu00244	Bacteria	Proteobacteria	Gammaproteobacteria	Gammaproteobacteria_Incertae_Sedis	Unknown_Family	uncultured	6795	0	0	6	22	11	9	115	147	151	146	154	176	313	38	18	5	75	1	0	1	8	62	54	33	48	229	166	753	196	36	11	0	7	0	1	9	75	343	54	16	19	11
Otu00245	Bacteria	Proteobacteria	Alphaproteobacteria	Rhizobiales	KF-JG30-B3	KF-JG30-B3_ge	4652	13	33	15	11	5	2	4	32	210	195	137	84	110	193	222	175	45	7	8	3	8	0	27	13	39	54	50	176	34	261	38	35	30	14	0	3	9	26	87	181	115	14
Otu00246	Bacteria	Bacteroidetes	Bacteroidia	Flavobacteriales	Flavobacteriaceae	Hoppeia	5909	0	0	2	0	0	0	0	1	35	70	199	482	213	125	316	105	47	1	0	0	0	0	7	1	25	106	57	199	31	198	16	15	16	0	0	0	0	8	150	270	63	41
Otu00247	Bacteria	Chloroflexi	Gitt-GS-136	Gitt-GS-136_or	Gitt-GS-136_fa	Gitt-GS-136_ge	6331	0	0	2	3	0	0	33	218	702	690	145	16	113	175	98	6	42	1	1	0	0	80	119	77	190	59	106	401	87	80	7	6	14	0	2	1	86	109	51	30	42	23
Otu00248	Bacteria	Planctomycetes	Planctomycetacia	Pirellulales	Pirellulaceae	Pir4_lineage	8121	0	1	2	0	23	54	177	136	705	688	339	747	210	501	155	105	93	2	0	32	17	26	96	47	91	146	30	156	70	131	135	8	25	0	1	13	9	20	79	151	53	82
Otu00249	Bacteria	Gemmatimonadetes	S0134_terrestrial_group	S0134_terrestrial_group_or	S0134_terrestrial_group_fa	S0134_terrestrial_group_ge	5622	0	16	73	22	47	70	82	55	146	183	462	385	210	14	3	5	55	0	14	33	21	66	46	56	100	940	47	10	0	3	4	1	4	0	16	14	149	185	12	6	5	10
Otu00250	Bacteria	Nitrospirae	2001-04-29	4-29-1_or	4-29-1_fa	4-29-1_ge	4445	0	0	0	0	1	1	2	5	11	15	23	36	37	8	10	2	101	0	6	8	11	41	49	24	4	22	60	54	13	69	48	267	614	0	193	40	122	245	39	43	141	17
Otu00251	Bacteria	Gemmatimonadetes	S0134_terrestrial_group	S0134_terrestrial_group_or	S0134_terrestrial_group_fa	S0134_terrestrial_group_ge	7051	28	358	202	87	731	318	161	75	85	28	156	163	46	3	6	2	20	41	40	218	83	32	26	48	9	1048	3	2	4	4	4	0	7	55	96	122	72	10	2	1	0	2
Otu00252	Bacteria	Chloroflexi	Anaerolineae	Anaerolineales	Anaerolineaceae	uncultured	3942	0	10	34	15	2	9	70	45	214	81	61	135	105	133	154	228	38	0	14	2	11	66	35	24	15	42	3	76	10	143	7	2	12	0	13	1	18	15	54	73	107	22
Otu00253	Bacteria	Acidobacteria	Acidobacteriia	Solibacterales	Solibacteraceae_(Subgroup_3)	PAUC26f	4688	0	1	4	14	77	118	123	89	149	157	196	343	91	200	55	175	33	0	0	53	31	16	19	27	33	172	40	68	21	89	46	3	11	0	16	14	35	33	26	48	17	114
Otu00254	Bacteria	Proteobacteria	Deltaproteobacteria	Desulfuromonadales	Desulfuromonadales_fa	Desulfuromonadales_ge	3426	0	33	87	49	10	12	34	34	128	67	110	40	55	12	19	28	21	0	33	9	21	23	16	17	85	117	4	11	4	33	1	11	4	0	83	58	45	61	124	89	37	27
Otu00255	Bacteria	Actinobacteria	Thermoleophilia	Gaiellales	Gaiellaceae	Gaiella	5397	129	329	115	76	40	41	195	111	171	78	142	65	38	6	15	3	17	149	112	51	67	92	64	61	26	40	28	9	2	6	6	1	7	80	103	54	30	19	6	4	1	8
Otu00256	Bacteria	Chloroflexi	Dehalococcoidia	S085	S085_fa	S085_ge	2315	9	64	46	36	32	10	55	40	102	101	135	96	36	45	52	36	12	17	13	16	12	11	34	16	25	45	13	44	6	14	6	4	10	15	16	19	15	17	10	19	6	67
Otu00257	Bacteria	Acidobacteria	Subgroup_6	Subgroup_6_or	Subgroup_6_fa	Subgroup_6_ge	460	0	5	2	1	2	0	1	2	11	17	27	18	24	16	14	16	10	2	1	0	0	2	1	1	1	5	1	17	0	14	0	3	1	3	5	0	2	3	6	10	12	1
Otu00258	Bacteria	Proteobacteria	Gammaproteobacteria	Nitrosococcales	Nitrosococcaceae	Cm1-21	4991	0	50	87	77	224	96	93	116	102	68	105	248	101	65	164	180	59	1	18	88	13	23	29	29	23	125	11	98	10	149	23	27	22	0	15	18	9	8	43	92	37	42
Otu00259	Bacteria	Acidobacteria	Thermoanaerobaculia	Thermoanaerobaculales	Thermoanaerobaculaceae	Subgroup_10	7800	0	0	0	0	0	0	0	0	25	13	9	12	37	736	464	981	31	0	0	0	0	0	0	0	11	41	12	56	22	136	39	0	9	0	0	0	0	0	289	622	70	2248
Otu00260	Bacteria	Gemmatimonadetes	BD2-11_terrestrial_group	BD2-11_terrestrial_group_or	BD2-11_terrestrial_group_fa	BD2-11_terrestrial_group_ge	3224	0	0	0	0	0	0	4	0	30	58	68	127	76	152	138	212	169	0	0	0	0	0	2	2	17	66	19	107	49	168	109	90	69	0	0	0	0	1	48	109	79	15
Otu00261	Bacteria	Proteobacteria	Gammaproteobacteria	JTB23	JTB23_fa	JTB23_ge	5410	0	0	0	0	0	0	0	0	3	4	3	3	2	106	218	2610	453	0	0	0	0	0	0	0	1	4	2	36	42	265	64	118	143	0	0	0	0	0	38	6	161	10
Otu00262	Bacteria	Proteobacteria	Deltaproteobacteria	RCP2-54	RCP2-54_fa	RCP2-54_ge	6584	0	6	13	25	2	4	164	214	521	480	263	474	161	79	61	17	55	1	3	5	10	49	99	33	55	306	73	105	11	21	7	4	8	0	28	14	71	133	16	31	31	16
Otu00263	Bacteria	Proteobacteria	Alphaproteobacteria	Sphingomonadales	Sphingomonadaceae	Ellin6055	3739	154	358	346	243	55	81	43	47	40	7	11	3	8	0	5	5	5	120	145	38	15	18	14	10	1	1	0	0	0	1	2	0	5	104	106	2	15	0	3	4	1	2
Otu00264	Bacteria	Actinobacteria	Actinobacteria	Micromonosporales	Micromonosporaceae	Longispora	4156	0	0	24	20	10	10	1	0	0	0	392	643	34	0	3	0	8	0	0	2	0	0	0	0	0	1875	0	1	0	1	0	3	2	0	3	33	30	0	6	2	0	0
Otu00265	Bacteria	Proteobacteria	Alphaproteobacteria	Sphingomonadales	Sphingomonadaceae	Novosphingobium	1896	36	70	91	114	14	15	6	42	45	39	30	13	15	20	36	60	16	34	28	6	5	17	5	13	1	3	1	19	8	35	22	5	16	26	24	4	6	7	4	7	8	5
Otu00266	Bacteria	Proteobacteria	Alphaproteobacteria	Rhizobiales	Xanthobacteraceae	Pseudolabrys	5665	54	89	71	2	53	71	131	71	49	40	25	19	20	58	45	95	208	40	44	56	49	0	31	33	2	3	3	27	7	86	21	544	817	2	10	35	43	2	34	42	116	85
Otu00267	Bacteria	Acidobacteria	Subgroup_6	Subgroup_6_or	Subgroup_6_fa	Subgroup_6_ge	1961	14	47	13	14	3	7	48	56	117	49	57	26	35	27	27	30	9	10	13	6	11	41	55	7	17	19	29	24	18	41	41	12	10	10	18	1	17	14	8	10	7	15
Otu00268	Bacteria	Proteobacteria	Deltaproteobacteria	Desulfobacterales	Desulfobulbaceae	uncultured	2934	0	0	0	0	1	1	12	10	88	22	9	5	17	7	6	6	21	0	0	5	4	20	29	23	4	9	4	10	4	11	2	257	13	0	28	10	18	80	15	38	175	10
Otu00269	Bacteria	Proteobacteria	Gammaproteobacteria	Betaproteobacteriales	Gallionellaceae	Sideroxydans	4713	1	1	0	0	0	0	0	0	3	1	0	2	5	4	4	1	16	2	3	1	4	0	0	0	1	3	0	7	0	8	5	109	92	27	1	0	0	0	4	2	432	537
Otu00270	Bacteria	Chloroflexi	Chloroflexia	Thermomicrobiales	AKYG1722	AKYG1722_ge	5486	3	123	126	69	279	220	100	69	224	99	173	238	67	102	80	49	30	21	50	176	46	33	38	69	18	199	5	48	24	41	6	3	7	2	18	118	15	12	29	62	19	38
Otu00271	Bacteria	Chloroflexi	KD4-96	KD4-96_or	KD4-96_fa	KD4-96_ge	2512	37	29	16	4	5	9	28	7	33	24	34	11	16	36	46	60	105	6	6	5	1	12	6	2	8	8	9	27	15	48	13	166	123	10	31	10	15	12	14	6	80	11
Otu00272	Bacteria	Actinobacteria	Actinobacteria	Micrococcales	Micrococcaceae	Pseudarthrobacter	5303	269	178	280	133	16	45	44	123	157	102	51	12	13	21	45	14	13	123	195	25	25	97	92	55	4	3	7	19	4	8	41	16	32	77	94	16	23	2	13	8	6	9
Otu00273	Bacteria	Proteobacteria	Deltaproteobacteria	Desulfobacterales	Desulfobulbaceae	Desulfopila	5403	0	0	0	0	0	0	0	0	5	2	11	9	7	370	73	122	117	0	0	0	0	0	0	0	1	8	0	73	0	35	9	572	34	0	0	0	0	1	15	48	314	8
Otu00274	Bacteria	Proteobacteria	Gammaproteobacteria	Betaproteobacteriales	Burkholderiaceae	Hydrogenophaga	2950	3	5	6	1	0	2	53	12	20	104	46	85	40	3	74	160	32	4	3	7	9	8	1	11	0	1	0	2	1	15	12	19	8	10	6	13	2	10	6	4	17	12
Otu00275	Bacteria	Planctomycetes	Planctomycetacia	Pirellulales	Pirellulaceae	Rhodopirellula	4511	2	41	67	78	52	37	81	193	345	130	67	46	23	83	115	183	124	4	50	8	16	74	88	38	20	20	27	78	20	69	43	12	27	1	28	9	32	37	14	38	33	3
Otu00276	Bacteria	Acidobacteria	Acidobacteriia	Solibacterales	Solibacteraceae_(Subgroup_3)	Candidatus_Solibacter	5513	0	23	22	10	221	86	115	65	110	74	139	583	211	14	14	5	22	12	15	284	64	34	56	45	18	474	159	20	2	8	8	0	15	1	23	69	32	38	3	6	1	7
Otu00277	Bacteria	Actinobacteria	Acidimicrobiia	Microtrichales	Iamiaceae	Iamia	4398	87	182	170	105	87	74	87	95	140	89	114	126	38	40	37	43	20	86	60	88	23	45	56	56	33	44	8	29	23	32	8	18	19	40	70	42	27	11	13	10	19	10
Otu00278	Bacteria	Firmicutes	Clostridia	Clostridiales	Peptococcaceae	Desulfosporosinus	2043	9	35	30	4	41	46	18	38	92	55	52	25	27	50	22	30	9	26	14	16	6	38	17	28	7	17	24	23	42	32	34	24	48	43	18	19	7	7	21	78	19	14
Otu00279	Bacteria	Planctomycetes	Planctomycetacia	Pirellulales	Pirellulaceae	Pirellulaceae_unclassified	3673	0	1	0	2	3	7	16	24	132	111	35	23	53	359	219	203	34	0	0	1	4	4	27	28	23	38	256	250	139	130	68	4	10	0	2	4	7	14	82	45	11	17
Otu00280	Bacteria	Chloroflexi	Anaerolineae	SBR1031	SBR1031_fa	SBR1031_ge	6081	0	0	0	0	0	0	3	10	16	114	141	146	348	825	294	454	45	0	0	0	0	1	0	1	13	155	26	343	31	236	20	10	7	0	0	0	0	2	140	183	78	398
Otu00281	Bacteria	Proteobacteria	Alphaproteobacteria	Dongiales	Dongiaceae	Dongia	3722	1	30	118	72	5	4	37	46	123	227	214	97	107	74	21	6	14	10	26	9	5	19	13	13	60	20	10	60	4	18	0	1	28	1	70	1	80	17	25	19	7	12
Otu00282	Bacteria	Proteobacteria	Gammaproteobacteria	Gammaproteobacteria_Incertae_Sedis	Unknown_Family	Acidibacter	3579	459	492	174	21	11	68	1	5	31	7	33	4	10	1	4	1	7	203	135	68	17	23	11	15	0	1	0	0	0	1	31	0	4	246	32	9	5	0	0	3	4	0
Otu00283	Bacteria	Actinobacteria	Thermoleophilia	Solirubrobacterales	67-14	67-14_ge	1575	0	19	70	60	6	11	52	55	83	78	16	19	26	52	31	5	8	3	13	10	11	69	70	30	9	10	27	45	7	7	2	0	2	0	21	11	14	6	6	2	8	1
Otu00284	Bacteria	Acidobacteria	Subgroup_22	Subgroup_22_or	Subgroup_22_fa	Subgroup_22_ge	7450	0	1	0	0	0	0	0	0	30	56	460	375	369	266	595	147	46	0	0	0	0	0	0	2	40	416	179	232	47	69	5	1	14	0	0	0	0	96	104	27	74	42
Otu00285	Bacteria	Gemmatimonadetes	Longimicrobia	Longimicrobiales	Longimicrobiaceae	Longimicrobiaceae_ge	3489	39	381	326	121	314	270	78	37	77	28	42	22	16	2	4	5	12	37	39	72	27	16	27	16	6	7	0	1	1	0	2	0	2	32	42	30	22	3	3	4	2	5
Otu00286	Bacteria	Proteobacteria	Alphaproteobacteria	Rhizobiales	Rhodomicrobiaceae	Rhodomicrobium	4901	1	104	145	63	126	97	86	89	327	196	240	411	99	154	29	20	26	13	14	63	13	17	11	55	40	152	1	81	18	28	0	2	4	1	48	35	43	25	44	43	10	28
Otu00287	Bacteria	Proteobacteria	Gammaproteobacteria	Acidiferrobacterales	Acidiferrobacteraceae	Sulfurifustis	6071	0	0	0	0	1	0	1	20	450	75	650	5	51	48	416	89	35	1	0	0	0	6	118	64	36	72	19	104	16	110	22	2	23	0	0	0	0	6	56	13	3	4
Otu00288	Bacteria	Acidobacteria	Holophagae	Subgroup_7	Subgroup_7_fa	Subgroup_7_ge	3253	236	386	102	38	11	14	10	31	88	27	55	3	16	3	9	23	11	104	107	22	9	15	26	27	3	1	2	5	5	5	7	8	16	176	91	8	10	2	4	5	8	2
Otu00289	Bacteria	Bacteroidetes	Bacteroidia	Bacteroidales	Prolixibacteraceae	uncultured	6152	0	1	0	0	0	9	6	24	92	43	255	629	126	157	57	162	114	1	0	7	12	35	14	10	17	164	10	156	15	128	7	61	40	0	2	15	7	37	69	150	233	63
Otu00290	Bacteria	Bacteroidetes	Bacteroidia	Cytophagales	Cyclobacteriaceae	uncultured	5768	0	14	68	34	1130	731	158	65	132	75	21	17	17	4	7	3	8	2	12	336	32	4	17	36	7	6	1	0	0	0	0	0	1	0	9	146	3	6	2	4	0	62
Otu00291	Bacteria	Proteobacteria	Gammaproteobacteria	Betaproteobacteriales	TRA3-20	TRA3-20_ge	3282	1	1	2	0	0	0	0	1	5	1	1	9	11	15	14	114	587	0	1	0	0	0	0	4	0	1	0	8	3	106	21	208	316	0	0	0	0	0	19	59	132	14
Otu00292	Bacteria	Chloroflexi	Anaerolineae	SBR1031	A4b	A4b_ge	5397	0	0	0	0	0	0	0	0	42	105	92	127	162	648	230	334	29	0	0	0	0	0	3	0	15	120	29	268	27	246	46	10	15	0	0	0	1	4	113	245	35	491
Otu00293	Bacteria	Proteobacteria	Gammaproteobacteria	Gammaproteobacteria_unclassified	Gammaproteobacteria_unclassified	Gammaproteobacteria_unclassified	3707	0	0	4	4	4	2	46	8	61	459	390	201	125	142	28	4	7	0	0	1	4	1	7	3	83	106	59	175	11	13	0	1	8	0	2	2	32	66	37	38	5	76
Otu00294	Bacteria	Planctomycetes	Planctomycetacia	Planctomycetales	uncultured	uncultured_ge	2333	24	78	54	23	79	25	32	16	89	49	61	123	16	7	6	0	2	47	56	26	7	54	46	32	11	146	2	0	1	0	0	0	2	17	38	56	14	5	2	0	1	2
Otu00295	Bacteria	Proteobacteria	Gammaproteobacteria	Nitrosococcales	Nitrosococcaceae	Nitrosococcaceae_unclassified	4885	0	0	0	0	0	0	0	0	31	246	29	11	115	503	300	177	26	0	0	0	0	0	1	7	22	13	77	453	89	484	65	9	5	0	0	0	0	0	131	360	17	9
Otu00296	Bacteria	Proteobacteria	Deltaproteobacteria	Myxococcales	Haliangiaceae	Haliangium	5183	0	6	5	2	7	5	29	12	33	66	458	1000	418	26	21	3	140	0	0	3	3	8	3	6	13	730	14	33	8	25	5	1	12	0	7	1	6	31	5	4	6	1
Otu00297	Bacteria	Proteobacteria	Deltaproteobacteria	Deltaproteobacteria_unclassified	Deltaproteobacteria_unclassified	Deltaproteobacteria_unclassified	3492	0	0	0	0	13	9	23	21	26	131	152	118	86	149	124	171	23	0	0	12	5	6	11	8	31	136	8	132	24	148	15	3	9	0	3	6	15	32	58	129	65	88
Otu00298	Bacteria	Actinobacteria	Thermoleophilia	Solirubrobacterales	67-14	67-14_ge	2204	7	106	100	76	21	41	50	104	128	77	31	31	8	6	6	0	5	8	53	50	20	61	53	22	9	56	5	5	5	3	0	1	2	6	19	56	23	9	2	2	7	2
Otu00299	Bacteria	Proteobacteria	Alphaproteobacteria	Tistrellales	Geminicoccaceae	uncultured	459	0	6	9	4	3	7	23	8	19	2	21	21	7	1	1	0	5	0	3	6	11	4	7	11	3	23	5	1	0	0	0	0	1	1	1	7	7	3	0	1	1	0
Otu00300	Bacteria	Proteobacteria	Gammaproteobacteria	EPR3968-O8a-Bc78	EPR3968-O8a-Bc78_fa	EPR3968-O8a-Bc78_ge	3855	0	0	12	2	24	40	33	54	126	74	240	630	134	355	31	54	28	0	0	27	17	24	32	28	37	52	12	41	1	38	13	27	23	0	1	7	11	21	31	33	47	21
Otu00301	Bacteria	Acidobacteria	Acidobacteriia	Solibacterales	Solibacteraceae_(Subgroup_3)	PAUC26f	4311	2	78	85	46	169	75	32	38	68	73	77	67	55	71	136	150	126	7	26	69	10	17	21	16	24	80	48	126	37	121	40	176	153	3	16	14	4	5	46	57	57	26
Otu00302	Bacteria	Chloroflexi	Anaerolineae	Anaerolineales	Anaerolineaceae	Anaerolinea	2754	47	169	59	8	18	18	7	204	166	4	15	1	8	0	1	1	4	269	94	58	12	18	7	24	3	5	0	3	2	2	1	1	1	161	44	14	6	0	2	2	1	3
Otu00303	Bacteria	Planctomycetes	Planctomycetacia	Pirellulales	Pirellulaceae	Pir4_lineage	3919	0	0	2	0	9	18	51	81	96	174	109	170	57	460	88	97	34	0	0	7	12	12	32	15	7	28	24	53	33	123	134	14	31	0	2	21	12	13	115	372	77	120
Otu00304	Bacteria	Proteobacteria	Gammaproteobacteria	CCD24	CCD24_fa	CCD24_ge	1701	0	3	3	4	11	11	9	9	27	221	221	132	71	43	33	38	11	0	4	35	2	0	3	4	11	51	2	4	1	23	11	0	2	0	11	12	8	22	4	5	1	9
Otu00305	Bacteria	Proteobacteria	Deltaproteobacteria	Desulfarculales	Desulfarculaceae	uncultured	1394	0	0	0	5	0	0	5	6	29	41	17	15	24	72	53	15	19	0	0	0	1	2	5	5	5	8	16	62	25	60	18	12	7	0	1	4	16	15	9	21	46	72
Otu00306	Bacteria	Firmicutes	Clostridia	Clostridiales	Peptococcaceae	Desulfosporosinus	3501	39	23	22	6	23	38	26	109	97	59	34	60	36	107	114	28	78	19	8	15	4	40	36	24	7	46	30	27	35	108	29	105	142	15	40	8	10	4	38	68	140	40
Otu00307	Bacteria	Proteobacteria	Deltaproteobacteria	Desulfobacterales	Desulfobulbaceae	Desulfobulbaceae_unclassified	426	0	0	0	0	0	0	0	0	0	3	0	4	1	13	8	14	4	0	0	0	0	0	0	0	2	0	0	25	3	29	0	6	2	0	0	0	0	0	6	13	73	3
Otu00308	Bacteria	Proteobacteria	Deltaproteobacteria	Desulfobacterales	Desulfobulbaceae	Desulfobulbaceae_unclassified	4336	0	47	35	9	17	38	63	98	363	50	24	5	5	11	52	13	5	61	78	69	46	114	70	70	10	18	2	49	3	3	2	0	3	83	269	90	93	138	14	24	9	4
Otu00309	Bacteria	Proteobacteria	Gammaproteobacteria	Betaproteobacteriales	Nitrosomonadaceae	mle1-7	5686	0	1	4	4	0	0	16	27	149	923	186	78	67	154	162	118	106	0	1	0	0	6	38	0	50	25	21	198	38	215	0	58	119	0	1	2	22	10	98	92	112	178
Otu00310	Bacteria	Proteobacteria	Alphaproteobacteria	Sphingomonadales	Sphingomonadaceae	Sphingomonas	3035	146	491	347	231	26	46	28	47	30	4	33	0	6	0	5	0	4	78	112	28	18	27	15	19	2	0	0	1	1	1	2	0	3	54	72	15	8	1	2	0	0	0
Otu00311	Bacteria	Proteobacteria	Gammaproteobacteria	Betaproteobacteriales	Burkholderiaceae	Noviherbaspirillum	2261	81	21	12	3	6	10	0	23	58	20	37	8	2	17	30	47	18	69	28	2	3	11	9	27	3	1	1	2	2	7	92	1	11	74	22	1	1	0	6	11	10	4
Otu00312	Bacteria	Verrucomicrobia	Verrucomicrobiae	Opitutales	Opitutaceae	Opitutus	3252	30	146	144	65	317	60	61	34	84	27	91	133	22	2	4	12	15	33	65	105	19	34	15	19	9	68	0	4	2	1	0	1	3	25	56	48	16	5	3	4	1	2
Otu00313	Bacteria	Rokubacteria	NC10	Methylomirabilales	Methylomirabilaceae	Sh765B-TzT-35	5466	0	0	1	0	0	0	1	0	6	26	16	279	126	84	46	1	24	0	0	0	0	1	0	0	4	77	45	83	2	77	18	15	256	0	0	0	2	7	17	20	126	202
Otu00314	Bacteria	Proteobacteria	Deltaproteobacteria	Desulfobacterales	Desulfobulbaceae	uncultured	4976	0	0	0	0	0	0	38	23	86	55	17	2	22	46	131	244	57	1	0	0	5	21	16	9	16	8	4	150	48	208	15	34	14	0	4	0	5	9	210	298	249	34
Otu00315	Bacteria	Firmicutes	Negativicutes	Selenomonadales	Veillonellaceae	Pelosinus	3056	57	55	31	10	16	26	17	66	72	66	55	100	34	74	79	30	20	22	7	7	6	85	46	21	24	53	69	26	31	26	24	8	229	22	30	10	14	10	6	15	53	170
Otu00316	Bacteria	Proteobacteria	Deltaproteobacteria	MBNT15	MBNT15_fa	MBNT15_ge	2255	0	0	0	0	0	0	0	0	1	2	0	0	0	0	3	23	28	0	0	0	0	0	0	0	0	2	0	15	0	27	1	100	25	0	0	0	0	0	16	6	276	861
Otu00317	Bacteria	Actinobacteria	Actinobacteria	Propionibacteriales	Nocardioidaceae	Nocardioides	3216	349	338	164	47	5	33	3	16	43	4	33	2	6	0	9	2	5	172	102	35	10	24	17	40	1	0	0	0	3	2	30	0	2	67	18	0	1	0	4	1	1	2
Otu00318	Bacteria	Actinobacteria	Acidimicrobiia	Microtrichales	uncultured	uncultured_ge	334	0	1	1	1	1	1	15	7	13	14	23	24	16	5	3	1	8	2	0	2	3	4	6	3	2	12	3	2	1	3	1	1	4	0	2	1	2	4	1	1	1	0
Otu00319	Bacteria	Gemmatimonadetes	BD2-11_terrestrial_group	BD2-11_terrestrial_group_or	BD2-11_terrestrial_group_fa	BD2-11_terrestrial_group_ge	7707	1	0	4	0	15	23	141	144	358	496	282	71	214	283	397	318	62	0	0	3	3	23	78	26	172	107	167	332	78	373	201	13	9	0	2	1	5	102	105	135	11	19
Otu00320	Bacteria	Proteobacteria	Alphaproteobacteria	Alphaproteobacteria_unclassified	Alphaproteobacteria_unclassified	Alphaproteobacteria_unclassified	6476	0	7	88	127	168	345	126	195	169	253	122	293	92	146	107	141	87	0	11	213	33	42	23	50	22	83	10	104	43	136	22	36	36	0	33	72	9	6	35	79	67	21
Otu00321	Bacteria	Acidobacteria	Blastocatellia_(Subgroup_4)	Pyrinomonadales	Pyrinomonadaceae	RB41	2465	9	26	23	22	5	11	20	31	69	54	35	42	29	19	15	3	30	6	22	10	0	12	17	7	18	41	28	33	4	32	11	18	16	97	38	38	40	47	10	6	37	80
Otu00322	Bacteria	Verrucomicrobia	Verrucomicrobiae	Opitutales	Opitutaceae	Opitutus	1487	79	44	16	4	32	41	11	22	48	14	47	9	17	19	24	26	17	64	32	37	3	8	4	7	1	4	3	30	6	8	3	5	4	94	12	1	4	1	5	5	6	11
Otu00323	Bacteria	Chloroflexi	P2-11E	P2-11E_or	P2-11E_fa	P2-11E_ge	3085	0	27	39	54	32	24	151	231	309	183	38	11	23	41	31	21	10	1	5	1	2	38	78	36	44	2	21	74	13	34	7	1	1	0	61	5	45	26	7	2	5	2
Otu00324	Bacteria	Acidobacteria	Acidobacteriia	Acidobacteriales	Acidobacteriales_unclassified	Acidobacteriales_unclassified	1351	8	21	22	4	18	15	45	75	88	75	34	11	4	15	15	28	5	1	6	14	10	30	48	19	7	20	6	10	3	4	1	2	2	19	12	7	8	7	3	3	1	7
Otu00325	Bacteria	Proteobacteria	Deltaproteobacteria	Desulfobacterales	Desulfobulbaceae	Desulfobulbaceae_ge	5363	0	39	94	3	42	38	21	216	359	14	7	37	8	2	18	12	17	51	199	179	71	211	71	108	8	19	0	36	8	5	1	143	18	29	153	41	12	35	20	55	84	16
Otu00326	Bacteria	Chloroflexi	Anaerolineae	SBR1031	A4b	A4b_ge	4726	0	3	4	3	9	12	80	148	183	356	240	355	157	574	29	40	23	0	2	4	15	31	23	19	21	226	12	40	2	15	7	1	8	0	6	3	22	24	16	27	12	65
Otu00327	Bacteria	Bacteroidetes	Ignavibacteria	Kryptoniales	BSV26	BSV26_ge	2123	0	0	0	0	0	0	0	0	17	22	40	22	42	118	54	46	38	0	0	0	0	0	0	1	13	12	41	169	9	55	28	63	42	0	0	0	1	10	28	22	57	17
Otu00328	Bacteria	Proteobacteria	Deltaproteobacteria	Desulfobacterales	Desulfobulbaceae	MSBL7	4379	0	0	0	0	0	0	0	0	0	1	0	1	1	3	0	4	7	0	0	0	0	1	0	0	0	24	0	31	0	18	3	26	22	0	0	0	0	0	24	140	239	7
Otu00329	Bacteria	Chloroflexi	Anaerolineae	Anaerolineales	Anaerolineaceae	uncultured	4725	0	0	0	0	0	0	0	0	1	9	9	4	4	13	4	13	60	0	0	0	0	0	0	0	2	15	0	73	2	128	9	447	661	0	0	0	0	0	25	27	78	637
Otu00330	Bacteria	Gemmatimonadetes	S0134_terrestrial_group	S0134_terrestrial_group_or	S0134_terrestrial_group_fa	S0134_terrestrial_group_ge	10279	1	430	653	343	1399	1517	384	36	100	11	32	6	31	1	11	0	24	8	95	317	32	23	15	23	15	1	0	0	1	0	0	0	0	3	46	164	0	0	3	7	1	0
Otu00331	Bacteria	Proteobacteria	Deltaproteobacteria	Desulfobacterales	Desulfobulbaceae	Desulfopila	3984	0	1	2	10	10	14	37	9	42	20	16	11	10	32	89	10	8	1	1	12	17	13	1	22	16	82	0	45	0	8	1	827	2	1	18	15	13	24	16	19	18	11
Otu00332	Bacteria	Planctomycetes	Planctomycetacia	Planctomycetales	uncultured	uncultured_ge	2103	0	4	13	9	11	12	74	98	204	119	36	26	17	69	47	61	11	0	5	9	15	13	62	27	22	29	17	57	22	29	23	0	1	0	14	8	27	7	13	16	13	28
Otu00333	Bacteria	Planctomycetes	Planctomycetacia	Pirellulales	Pirellulaceae	Pir4_lineage	5199	0	0	0	0	0	0	1	1	55	172	63	24	26	89	71	348	8	0	0	0	0	0	3	6	22	14	41	76	31	34	16	2	22	0	0	1	2	24	50	125	32	2610
Otu00334	Bacteria	Planctomycetes	Planctomycetacia	Pirellulales	Pirellulaceae	Pir4_lineage	3539	1	56	53	13	6	26	21	109	74	51	28	32	25	205	101	128	44	7	20	34	10	21	24	24	8	9	27	36	41	59	50	26	34	2	11	38	15	26	34	122	55	227
Otu00335	Bacteria	Proteobacteria	Gammaproteobacteria	Gammaproteobacteria_unclassified	Gammaproteobacteria_unclassified	Gammaproteobacteria_unclassified	5654	0	0	0	1	0	0	5	57	102	64	304	290	191	56	191	62	104	0	0	0	0	2	1	2	87	155	24	99	71	221	33	12	7	0	0	0	1	13	100	122	61	71
Otu00336	Bacteria	Bacteroidetes	Bacteroidia	Cytophagales	Microscillaceae	Microscillaceae_unclassified	6052	5	184	162	129	57	52	205	263	209	85	59	64	68	57	54	48	21	20	122	44	57	86	84	52	37	33	33	123	9	47	33	3	6	27	240	37	122	81	11	37	6	6
Otu00337	Bacteria	Chloroflexi	Gitt-GS-136	Gitt-GS-136_or	Gitt-GS-136_fa	Gitt-GS-136_ge	5328	1	2	41	48	0	3	122	181	269	244	197	66	119	101	90	33	51	0	11	1	21	112	86	53	202	30	63	87	36	54	17	53	25	0	49	16	121	114	13	17	25	7
Otu00338	Bacteria	Proteobacteria	Gammaproteobacteria	Gammaproteobacteria_unclassified	Gammaproteobacteria_unclassified	Gammaproteobacteria_unclassified	5469	0	84	109	93	170	321	274	166	119	96	165	135	50	1	3	1	16	5	64	287	136	112	90	3	66	62	17	7	1	0	10	2	4	1	97	11	98	101	4	3	2	3
Otu00339	Bacteria	Proteobacteria	Gammaproteobacteria	EPR3968-O8a-Bc78	EPR3968-O8a-Bc78_fa	EPR3968-O8a-Bc78_ge	2539	0	0	0	1	1	53	150	74	180	24	29	19	25	98	151	120	12	0	0	0	11	4	18	26	7	13	7	32	13	60	18	0	7	0	0	19	1	9	43	53	16	338
Otu00340	Bacteria	Acidobacteria	Subgroup_5	Subgroup_5_or	Subgroup_5_fa	Subgroup_5_ge	2164	0	0	9	2	57	66	75	45	97	87	71	61	42	85	51	77	17	1	0	29	10	6	20	6	22	49	37	97	26	62	26	0	2	0	4	6	9	5	15	22	5	9
Otu00341	Bacteria	Gemmatimonadetes	BD2-11_terrestrial_group	BD2-11_terrestrial_group_or	BD2-11_terrestrial_group_fa	BD2-11_terrestrial_group_ge	2531	2	22	17	14	95	54	108	52	140	105	97	97	62	63	32	37	16	4	6	51	12	13	45	20	33	64	8	32	11	27	7	2	5	2	9	15	33	30	7	14	6	11
Otu00342	Bacteria	Proteobacteria	Deltaproteobacteria	SAR324_clade(Marine_group_B)	SAR324_clade(Marine_group_B)_fa	SAR324_clade(Marine_group_B)_ge	6119	0	0	0	0	0	0	0	0	28	96	151	80	152	277	447	313	81	0	0	0	0	0	1	2	22	106	26	218	72	409	129	80	63	0	0	0	0	2	160	321	168	66
Otu00343	Bacteria	Proteobacteria	Gammaproteobacteria	Betaproteobacteriales	Nitrosomonadaceae	mle1-7	4864	0	0	1	5	0	0	8	26	39	114	89	298	372	163	309	10	82	0	2	1	0	3	12	6	20	25	87	166	42	193	39	43	97	0	6	3	6	19	38	37	73	22
Otu00344	Bacteria	Acidobacteria	Subgroup_6	Subgroup_6_or	Subgroup_6_fa	Subgroup_6_ge	2257	0	0	3	5	11	14	74	20	68	33	138	118	73	21	40	15	15	0	0	9	23	22	3	4	42	106	53	54	20	29	24	4	6	0	0	12	8	7	16	12	8	8
Otu00345	Bacteria	Chloroflexi	Anaerolineae	Anaerolineales	Anaerolineaceae	Anaerolineaceae_unclassified	3449	1	0	0	0	0	0	2	2	21	10	26	103	65	77	74	277	132	0	0	0	0	0	0	0	3	35	3	32	2	58	10	321	162	0	0	0	1	5	42	188	69	21
Otu00346	Bacteria	Actinobacteria	Thermoleophilia	Solirubrobacterales	67-14	67-14_ge	1939	115	113	87	33	75	18	17	27	32	13	23	18	10	7	6	6	7	90	59	50	8	18	7	12	1	35	8	7	0	4	1	2	6	47	21	27	5	2	2	5	3	4
Otu00347	Bacteria	Actinobacteria	Thermoleophilia	Thermoleophilia_unclassified	Thermoleophilia_unclassified	Thermoleophilia_unclassified	3457	45	169	101	60	40	46	190	88	116	112	22	4	7	7	10	1	9	70	136	62	38	68	41	40	17	4	11	9	6	4	3	1	2	20	87	24	33	6	1	3	1	0
Otu00348	Bacteria	Proteobacteria	Gammaproteobacteria	Steroidobacterales	Woeseiaceae	Woeseia	4863	0	0	0	0	0	0	0	1	80	16	101	124	130	198	191	691	42	0	1	0	0	0	0	1	8	72	18	76	8	73	14	7	17	0	0	0	0	104	131	77	15	66
Otu00349	Bacteria	Proteobacteria	Deltaproteobacteria	Deltaproteobacteria_unclassified	Deltaproteobacteria_unclassified	Deltaproteobacteria_unclassified	296	0	2	3	2	2	4	7	3	9	9	15	13	9	3	8	4	2	0	1	1	1	0	0	2	3	21	0	1	0	1	0	1	1	0	1	0	4	1	2	2	0	7
Otu00350	Archaea	Crenarchaeota	Bathyarchaeia	Bathyarchaeia_or	Bathyarchaeia_fa	Bathyarchaeia_ge	2687	0	0	1	1	3	13	23	9	7	14	8	27	14	21	28	13	9	0	1	2	6	8	2	3	0	17	7	77	0	156	2	102	400	0	0	7	5	13	23	31	35	132
Otu00351	Bacteria	BRC1	BRC1_cl	BRC1_or	BRC1_fa	BRC1_ge	1888	0	1	0	0	0	0	7	13	46	65	64	55	50	83	82	82	31	0	0	1	1	1	4	5	14	54	23	111	31	89	12	4	26	0	0	1	0	5	47	38	34	22
Otu00352	Bacteria	Actinobacteria	Acidimicrobiia	Microtrichales	Ilumatobacteraceae	uncultured	3862	170	196	223	208	99	69	51	30	48	19	68	68	14	0	5	4	3	135	131	151	22	31	25	30	9	39	9	1	2	1	6	4	10	40	55	75	24	12	1	1	2	1
Otu00353	Bacteria	Gemmatimonadetes	BD2-11_terrestrial_group	BD2-11_terrestrial_group_or	BD2-11_terrestrial_group_fa	BD2-11_terrestrial_group_ge	1528	0	76	72	21	14	9	3	8	18	14	40	94	31	46	21	61	28	6	31	20	3	5	2	9	9	56	8	12	3	32	20	13	15	5	29	18	5	2	5	25	14	3
Otu00354	Bacteria	Actinobacteria	Actinobacteria	Propionibacteriales	Nocardioidaceae	Nocardioides	3512	165	179	269	277	21	24	46	50	101	87	22	25	7	8	11	4	3	124	98	43	19	77	60	36	5	2	0	6	2	2	24	1	3	22	60	13	12	5	3	1	0	1
Otu00355	Bacteria	Acidobacteria	Subgroup_6	Subgroup_6_or	Subgroup_6_fa	Subgroup_6_ge	1624	76	130	107	5	1	8	29	7	4	8	8	14	35	81	44	78	15	46	25	4	1	5	5	2	0	1	0	38	9	71	16	12	12	56	4	0	0	0	8	6	6	1
Otu00356	Bacteria	Proteobacteria	Alphaproteobacteria	Rhizobiales	Xanthobacteraceae	Xanthobacteraceae_unclassified	1835	101	51	32	17	10	20	26	51	53	67	45	16	22	33	8	2	8	75	35	12	11	40	15	20	15	27	4	11	6	14	8	4	10	72	18	14	13	14	1	2	1	28
Otu00357	Bacteria	Chloroflexi	Anaerolineae	Anaerolineales	Anaerolineaceae	uncultured	4237	0	0	1	2	4	4	21	18	69	82	336	515	161	287	54	116	83	0	0	4	2	6	6	4	26	158	13	78	31	197	32	28	51	0	0	1	5	5	29	82	99	24
Otu00358	Bacteria	Bacteroidetes	Rhodothermia	Rhodothermales	Rhodothermaceae	uncultured	2480	0	17	49	18	9	8	126	65	174	108	27	2	40	29	20	10	38	0	18	7	27	29	32	26	29	5	29	88	12	54	11	1	6	0	45	14	40	43	5	10	12	2
Otu00359	Bacteria	Bacteroidetes	Bacteroidia	Cytophagales	Cyclobacteriaceae	uncultured	302	0	0	0	0	0	0	0	0	11	13	21	15	15	15	9	5	6	0	0	0	0	0	0	0	1	5	1	15	1	12	1	3	0	0	0	0	0	2	8	11	1	0
Otu00360	Bacteria	Actinobacteria	Thermoleophilia	Gaiellales	uncultured	uncultured_ge	2839	1	18	26	49	0	1	54	100	100	84	21	288	141	71	31	2	61	3	13	0	5	48	27	20	15	91	88	178	12	11	2	0	4	6	32	1	13	90	11	8	1	3
Otu00361	Bacteria	Actinobacteria	Thermoleophilia	Gaiellales	uncultured	uncultured_ge	2109	5	16	10	11	2	6	134	165	185	68	12	13	24	29	43	4	13	11	22	10	19	99	49	24	16	0	18	55	18	29	5	2	6	18	20	11	23	2	5	1	6	2
Otu00362	Bacteria	Actinobacteria	Actinobacteria	Propionibacteriales	Propionibacteriaceae	Haloactinopolyspora	1657	1	99	199	44	11	13	46	44	43	40	43	38	32	4	5	1	14	4	11	20	19	30	16	17	10	61	16	8	2	1	0	1	3	2	26	21	20	28	3	0	1	3
Otu00363	Bacteria	Acidobacteria	Acidobacteriia	Subgroup_2	Subgroup_2_fa	Subgroup_2_ge	2655	0	0	0	0	1	3	10	10	31	48	31	14	52	69	115	261	13	0	1	4	2	1	6	3	7	28	79	144	19	30	10	14	18	0	0	0	8	35	28	14	89	158
Otu00364	Bacteria	Proteobacteria	Deltaproteobacteria	Desulfuromonadales	Desulfuromonadaceae	Desulfuromonas	3054	0	0	0	3	8	7	45	117	275	296	49	14	22	99	38	46	46	0	1	7	3	7	8	13	31	26	0	26	22	37	8	131	18	0	5	3	3	7	48	97	169	72
Otu00365	Bacteria	Firmicutes	Clostridia	Clostridiales	Ruminococcaceae	Ruminiclostridium_1	1371	2	3	3	0	12	31	9	5	12	10	22	38	25	18	14	9	8	20	5	14	3	9	8	7	3	23	23	13	10	25	3	37	44	184	18	22	9	16	6	15	18	8
Otu00366	Bacteria	Proteobacteria	Deltaproteobacteria	Deltaproteobacteria_unclassified	Deltaproteobacteria_unclassified	Deltaproteobacteria_unclassified	293	2	9	2	3	15	6	3	3	5	2	8	12	3	0	1	0	4	8	3	7	3	5	1	1	0	34	0	0	0	0	0	1	1	2	0	5	0	0	0	0	0	0
Otu00367	Bacteria	Chloroflexi	KD4-96	KD4-96_or	KD4-96_fa	KD4-96_ge	2441	6	1	4	10	4	6	16	54	116	77	61	28	22	56	87	28	20	1	0	0	5	28	37	12	48	37	7	46	30	82	17	76	98	1	12	28	8	6	25	29	50	9
Otu00368	Bacteria	Bacteroidetes	Bacteroidia	Cytophagales	Microscillaceae	uncultured	4585	600	687	381	46	4	42	0	0	23	0	2	0	0	0	0	0	4	482	132	0	10	17	1	0	0	0	0	0	0	0	19	0	6	431	33	0	0	0	1	0	6	0
Otu00369	Bacteria	Planctomycetes	Planctomycetacia	Planctomycetales	Gimesiaceae	uncultured	2456	0	32	38	10	23	43	115	96	184	145	68	33	25	39	33	5	9	4	21	32	21	52	56	44	34	30	47	59	13	16	9	0	7	2	17	33	28	27	3	5	3	20
Otu00370	Bacteria	Actinobacteria	MB-A2-108	MB-A2-108_or	MB-A2-108_fa	MB-A2-108_ge	4268	0	10	50	46	3	5	218	393	598	391	99	101	36	11	18	2	23	2	22	3	13	136	211	89	46	7	42	43	19	6	4	0	7	2	53	11	44	32	3	4	1	5
Otu00371	Bacteria	Proteobacteria	Deltaproteobacteria	Deltaproteobacteria_unclassified	Deltaproteobacteria_unclassified	Deltaproteobacteria_unclassified	284	0	0	2	0	0	3	4	5	28	18	5	21	10	5	5	0	6	0	0	3	0	0	3	0	1	18	1	7	1	0	0	2	2	0	1	0	2	1	4	8	3	3
Otu00372	Bacteria	Chloroflexi	Anaerolineae	Ardenticatenales	uncultured	uncultured_ge	399	0	2	7	1	2	3	15	7	16	33	27	4	21	3	0	0	21	0	2	2	9	6	5	2	0	2	12	0	0	2	0	0	0	0	1	6	5	16	5	1	3	2
Otu00373	Bacteria	Proteobacteria	Gammaproteobacteria	Steroidobacterales	Woeseiaceae	JTB255_marine_benthic_group	5654	0	43	337	358	680	242	132	168	114	51	142	89	49	3	31	8	22	0	7	52	18	32	27	41	15	28	0	4	8	9	2	0	3	1	16	17	3	11	1	8	0	1
Otu00374	Bacteria	Acidobacteria	Subgroup_17	Subgroup_17_or	Subgroup_17_fa	Subgroup_17_ge	3943	0	0	0	1	1	0	1	8	7	10	3	5	7	6	11	60	59	0	0	1	0	7	1	3	4	6	8	32	3	50	4	108	864	0	1	3	19	8	18	21	45	69
Otu00375	Bacteria	Bacteroidetes	Ignavibacteria	Kryptoniales	BSV26	BSV26_ge	2461	0	0	0	0	0	0	0	0	2	0	1	4	15	103	101	478	35	1	0	0	0	0	0	0	0	2	13	168	19	90	11	1	16	0	0	0	0	0	63	30	360	32
Otu00376	Bacteria	Chloroflexi	Anaerolineae	SBR1031	A4b	A4b_ge	3456	1	0	0	0	0	0	0	0	8	6	3	20	67	295	244	349	142	0	0	0	0	0	0	0	3	24	73	316	24	248	57	16	14	0	0	0	0	0	58	88	166	9
Otu00377	Bacteria	Proteobacteria	Deltaproteobacteria	Desulfobacterales	Desulfobulbaceae	MSBL7	2196	1	3	1	0	45	13	38	35	38	114	51	4	16	10	27	12	34	11	11	31	21	21	17	36	56	4	3	23	35	56	4	7	3	1	51	36	54	27	33	26	12	3
Otu00378	Bacteria	Acidobacteria	Subgroup_6	Subgroup_6_or	Subgroup_6_fa	Subgroup_6_ge	281	5	13	10	8	2	3	9	1	11	4	8	2	4	3	3	0	4	0	2	3	3	6	6	4	1	1	1	0	0	2	0	0	3	7	7	6	2	0	1	1	1	0
Otu00379	Bacteria	Bacteroidetes	Bacteroidia	Flavobacteriales	Flavobacteriaceae	Flavobacterium	1139	70	24	12	9	4	44	12	3	48	37	17	10	11	6	44	119	19	0	1	0	0	1	0	0	0	0	0	0	1	0	0	0	1	4	2	0	0	8	8	1	3	4
Otu00380	Bacteria	Proteobacteria	Deltaproteobacteria	Desulfobacterales	Desulfobacteraceae	Desulfosarcina	3635	0	0	0	0	2	4	5	3	10	27	23	28	15	35	10	63	112	1	0	7	5	1	4	5	2	33	0	13	8	74	20	444	39	0	0	3	3	15	36	183	409	50
Otu00381	Bacteria	Chloroflexi	Anaerolineae	Ardenticatenales	uncultured	uncultured_ge	1438	0	0	13	2	1	1	23	24	65	32	16	25	19	12	42	12	33	0	8	0	3	16	32	6	2	25	8	15	2	13	1	12	21	0	5	15	41	36	8	10	51	16
Otu00382	Bacteria	Proteobacteria	Deltaproteobacteria	Desulfuromonadales	Geobacteraceae	Geobacter	317	0	0	1	0	2	1	1	1	14	5	1	1	4	0	11	4	1	0	3	1	1	1	1	4	1	4	0	8	0	6	1	2	0	4	21	0	2	3	1	5	7	10
Otu00383	Bacteria	Actinobacteria	Acidimicrobiia	IMCC26256	IMCC26256_fa	IMCC26256_ge	3365	3	34	57	70	40	112	129	54	92	72	121	94	42	26	40	0	15	2	42	112	55	41	44	57	44	104	4	13	6	15	2	0	3	0	58	61	49	26	6	4	2	4
Otu00384	Bacteria	Proteobacteria	Gammaproteobacteria	Betaproteobacteriales	Rhodocyclaceae	Propionivibrio	3441	0	3	0	1	3	2	3	0	1	1	54	2	8	1	4	7	2	27	7	4	2	4	0	4	1	6	0	53	2	41	0	47	2	45	167	9	0	4	15	40	31	14
Otu00385	Bacteria	Proteobacteria	Alphaproteobacteria	Tistrellales	Geminicoccaceae	uncultured	3957	1	37	26	14	20	58	181	140	137	102	208	193	152	23	48	1	36	4	13	70	42	53	43	62	62	139	76	36	18	13	6	1	4	7	25	22	34	62	12	10	4	3
Otu00386	Bacteria	Bacteroidetes	Bacteroidia	Flavobacteriales	Flavobacteriaceae	Hoppeia	4476	0	0	0	0	0	1	0	1	30	54	172	303	132	126	307	227	44	0	0	0	0	0	3	2	20	125	74	179	18	195	21	66	10	0	0	0	0	14	69	89	59	14
Otu00387	Bacteria	Gemmatimonadetes	AKAU4049	AKAU4049_or	AKAU4049_fa	AKAU4049_ge	2492	0	0	13	6	1	0	67	152	289	94	23	22	59	70	27	0	32	0	3	2	3	72	92	39	20	1	64	98	12	15	1	2	14	0	7	4	46	124	4	9	11	8
Otu00388	Bacteria	Verrucomicrobia	Verrucomicrobiae	Opitutales	Opitutaceae	Alterococcus	1731	0	10	36	22	39	37	34	23	89	68	53	145	22	66	26	98	15	1	6	20	11	4	9	5	5	17	0	24	3	36	8	14	6	0	4	14	11	6	10	46	9	71
Otu00389	Bacteria	Proteobacteria	Alphaproteobacteria	Rhizobiales	Xanthobacteraceae	uncultured	3089	27	115	80	18	18	37	70	61	98	108	94	77	90	19	20	14	36	17	43	17	14	48	39	11	30	74	54	65	5	5	2	27	33	14	31	42	23	42	19	6	2	11
Otu00390	Bacteria	Gemmatimonadetes	Gemmatimonadetes	Gemmatimonadales	Gemmatimonadaceae	uncultured	5883	2	178	220	122	96	56	53	114	143	154	202	149	106	8	38	72	27	24	55	67	19	36	58	36	86	358	0	10	4	11	5	4	11	0	71	65	97	38	7	10	3	12
Otu00391	Bacteria	Planctomycetes	Planctomycetacia	Pirellulales	Pirellulaceae	Pir4_lineage	2229	13	40	35	7	22	20	54	60	128	184	72	79	44	82	45	87	20	6	18	11	6	14	14	14	17	11	14	47	8	35	37	2	15	9	8	8	22	7	19	53	8	7
Otu00392	Bacteria	Chloroflexi	Anaerolineae	Anaerolineales	Anaerolineaceae	uncultured	5427	0	2	12	9	2	1	70	343	1017	475	146	18	31	20	26	8	11	0	2	1	13	364	378	151	120	24	46	38	28	20	44	1	7	0	3	3	82	26	27	10	18	14
Otu00393	Bacteria	Actinobacteria	Actinobacteria	Propionibacteriales	Propionibacteriaceae	Microlunatus	2018	184	62	57	29	2	19	121	100	96	20	17	30	39	6	14	1	5	44	31	2	16	72	48	39	8	5	37	5	3	2	3	0	0	44	22	3	16	37	6	4	2	1
Otu00394	Bacteria	Proteobacteria	Gammaproteobacteria	Thiotrichales	Thiotrichaceae	uncultured	2760	0	0	0	0	1	0	0	4	3	3	35	16	43	13	235	92	52	0	0	0	0	0	0	0	4	9	0	40	13	128	1	7	66	0	0	0	0	0	193	134	60	37
Otu00395	Bacteria	Chloroflexi	Anaerolineae	Anaerolineales	Anaerolineaceae	UTCFX1	440	11	24	16	5	5	4	1	6	5	8	4	9	1	0	0	1	7	29	22	10	3	4	3	3	0	5	0	4	0	4	1	2	7	12	7	3	1	1	1	0	1	1
Otu00396	Bacteria	Chloroflexi	Anaerolineae	Anaerolineales	Anaerolineaceae	uncultured	5024	0	0	1	0	0	0	0	0	138	32	10	1	4	12	24	16	74	0	0	0	0	0	13	10	1	9	0	65	8	108	2	257	397	0	0	0	0	1	17	15	141	836
Otu00397	Bacteria	Bacteroidetes	Bacteroidia	Chitinophagales	Chitinophagaceae	Terrimonas	1706	251	135	47	9	2	44	2	6	22	18	24	1	4	0	6	12	8	72	45	20	2	10	19	8	0	2	1	1	1	0	13	0	1	123	15	1	4	6	1	3	0	1
Otu00398	Bacteria	Proteobacteria	Alphaproteobacteria	Rhizobiales	Rhizobiales_Incertae_Sedis	Bauldia	2851	0	1	1	0	0	0	10	4	11	21	12	7	6	122	53	677	13	1	1	0	0	1	0	1	2	5	3	49	30	31	7	2	8	0	1	0	2	0	24	65	22	925
Otu00399	Bacteria	Bacteroidetes	Rhodothermia	Rhodothermales	Rhodothermaceae	uncultured	2946	0	0	0	0	0	0	0	0	1	2	74	59	79	103	291	142	28	0	0	0	0	0	0	0	3	32	14	60	57	210	37	4	11	0	0	1	0	2	29	12	71	7
Otu00400	Bacteria	Acidobacteria	Subgroup_6	Subgroup_6_or	Subgroup_6_fa	Subgroup_6_ge	2265	8	47	16	3	9	13	4	12	48	29	14	5	16	80	64	216	143	2	12	4	0	1	3	2	10	2	16	40	9	62	35	165	62	13	2	5	6	2	10	41	61	8
Otu00401	Bacteria	Bacteroidetes	Bacteroidia	Cytophagales	Cyclobacteriaceae	uncultured	4757	0	0	0	0	0	0	0	3	59	95	197	360	207	245	284	302	47	0	0	0	0	0	0	4	33	138	20	162	34	232	47	18	14	0	0	0	0	10	75	158	68	27
Otu00402	Bacteria	Bacteroidetes	Bacteroidia	Flavobacteriales	Flavobacteriaceae	Flavobacterium	3292	0	0	0	0	0	1	1	0	0	4	1	1	0	0	99	663	104	2	0	0	0	0	0	0	0	0	1	0	0	0	0	25	27	0	0	0	0	0	2	10	68	3
Otu00403	Bacteria	Chloroflexi	Anaerolineae	Ardenticatenales	uncultured	uncultured_ge	2555	0	11	10	9	19	6	39	18	52	57	109	94	42	38	76	36	24	2	6	14	6	11	12	16	23	31	17	52	27	65	6	20	16	0	7	35	13	15	30	121	27	195
Otu00404	Bacteria	Chloroflexi	Anaerolineae	Anaerolineales	Anaerolineaceae	uncultured	1319	0	1	2	0	0	0	13	12	5	12	11	261	41	19	40	0	37	0	1	2	1	3	3	0	2	59	16	37	3	36	4	12	17	0	0	0	3	13	14	16	46	9
Otu00405	Bacteria	Planctomycetes	Phycisphaerae	MSBL9	SG8-4	SG8-4_ge	2467	0	0	0	0	0	0	0	0	1	8	1	0	1	3	2	1	8	0	0	0	0	0	0	0	0	8	0	38	0	49	3	86	873	0	0	0	0	0	10	7	31	283
Otu00406	Bacteria	Acidobacteria	Subgroup_5	Subgroup_5_or	Subgroup_5_fa	Subgroup_5_ge	2534	0	0	4	1	8	13	83	40	180	211	83	49	46	235	93	16	13	0	2	12	7	10	38	37	40	24	50	59	16	77	16	0	4	0	1	13	5	12	17	29	8	58
Otu00407	Bacteria	Proteobacteria	Gammaproteobacteria	Gammaproteobacteria_Incertae_Sedis	Unknown_Family	uncultured	2580	0	0	0	0	0	0	0	0	6	2	1	5	10	49	56	167	157	1	0	0	0	0	0	0	0	4	1	23	20	282	90	147	54	0	0	0	0	0	35	228	125	9
Otu00408	Bacteria	Proteobacteria	Deltaproteobacteria	SAR324_clade(Marine_group_B)	SAR324_clade(Marine_group_B)_fa	SAR324_clade(Marine_group_B)_ge	371	0	0	0	0	0	0	0	0	2	4	3	6	6	22	26	19	7	0	0	0	0	0	0	0	2	6	2	18	0	28	0	7	6	0	0	0	0	0	10	17	11	3
Otu00409	Bacteria	Latescibacteria	Latescibacteria_cl	Latescibacteria_or	Latescibacteria_fa	Latescibacteria_ge	5355	0	0	0	0	1	0	0	1	3	4	0	0	8	211	728	1024	301	0	0	0	0	0	0	0	0	5	6	82	168	708	178	50	93	0	0	0	0	0	36	29	163	9
Otu00410	Bacteria	Acidobacteria	Thermoanaerobaculia	Thermoanaerobaculales	Thermoanaerobaculaceae	Subgroup_10	4909	0	1	12	22	46	46	85	121	157	217	588	383	87	24	25	7	13	1	1	5	11	27	39	27	134	290	9	18	11	5	7	2	5	0	3	28	50	26	0	3	2	4
Otu00411	Bacteria	Proteobacteria	Gammaproteobacteria	Betaproteobacteriales	Gallionellaceae	Gallionellaceae_unclassified	2264	0	0	0	0	0	0	0	0	0	1	0	0	0	0	0	0	3	0	0	0	0	0	0	0	0	0	0	0	0	2	0	0	77	0	0	0	0	0	1	0	1701	183
Otu00412	Bacteria	Chloroflexi	Chloroflexia	Thermomicrobiales	AKYG1722	AKYG1722_ge	2476	0	1	28	22	2	2	62	50	103	147	290	120	99	27	21	4	16	0	5	7	12	40	31	24	34	57	9	16	8	5	1	0	6	0	33	14	40	30	10	9	11	115
Otu00413	Bacteria	Bacteroidetes	Bacteroidia	Bacteroidales	Bacteroidetes_vadinHA17	Bacteroidetes_vadinHA17_ge	3074	2	0	1	0	0	0	1	5	10	3	0	3	2	0	3	26	73	0	0	0	1	0	1	0	1	4	0	25	0	46	0	618	480	13	3	0	0	0	16	24	61	215
Otu00414	Bacteria	Chloroflexi	Dehalococcoidia	SAR202_clade	SAR202_clade_fa	SAR202_clade_ge	2047	0	9	35	18	64	34	73	15	61	35	108	131	39	44	36	26	23	0	9	12	18	20	12	7	3	62	0	40	2	21	5	9	10	0	23	9	9	5	20	16	16	2
Otu00415	Bacteria	Actinobacteria	Thermoleophilia	Gaiellales	Gaiellaceae	Gaiella	476	0	4	7	4	0	3	15	24	19	26	13	15	14	7	11	1	11	0	2	1	2	19	7	3	3	7	7	8	4	6	1	2	2	0	4	2	4	4	2	4	3	0
Otu00416	Bacteria	Proteobacteria	Gammaproteobacteria	Betaproteobacteriales	Nitrosomonadaceae	Nitrosomonas	3184	0	0	0	0	0	0	0	0	11	8	10	61	13	214	276	285	35	0	0	0	0	0	1	0	0	6	1	80	38	339	28	21	2	0	0	0	0	1	87	253	80	31
Otu00417	Bacteria	Verrucomicrobia	Verrucomicrobiae	Pedosphaerales	Pedosphaeraceae	Pedosphaeraceae_ge	1323	0	0	2	5	5	5	2	9	13	32	27	71	23	47	70	97	13	0	1	8	2	0	2	1	4	37	1	53	6	49	4	15	3	0	0	5	2	4	22	33	8	29
Otu00418	Bacteria	Proteobacteria	Alphaproteobacteria	Rhodospirillales	Magnetospiraceae	uncultured	2416	0	0	3	2	10	14	67	37	139	119	79	49	60	139	98	129	26	0	0	13	7	4	13	10	16	46	6	56	12	63	4	13	25	0	2	2	2	3	44	103	27	139
Otu00419	Bacteria	Acidobacteria	Subgroup_6	Subgroup_6_or	Subgroup_6_fa	Subgroup_6_ge	3028	0	0	0	0	0	0	0	0	1	6	15	10	113	205	189	431	37	0	0	0	0	0	1	0	1	3	83	173	42	166	78	17	11	0	0	0	0	0	53	64	55	13
Otu00420	Bacteria	Actinobacteria	Thermoleophilia	Solirubrobacterales	67-14	67-14_ge	1344	0	11	8	9	6	9	62	44	66	79	47	83	46	20	21	8	17	0	5	10	5	16	19	16	9	52	28	28	8	10	6	1	4	2	5	9	8	25	5	12	2	4
Otu00421	Bacteria	Gemmatimonadetes	S0134_terrestrial_group	S0134_terrestrial_group_or	S0134_terrestrial_group_fa	S0134_terrestrial_group_ge	3237	0	25	122	70	48	18	42	31	65	89	299	223	29	5	2	2	6	0	23	58	19	17	14	23	41	224	1	1	0	1	2	0	3	0	43	54	60	31	6	3	0	2
Otu00422	Bacteria	Chloroflexi	Dehalococcoidia	SAR202_clade	SAR202_clade_fa	SAR202_clade_ge	897	0	5	0	0	1	7	22	13	46	69	13	6	16	59	45	29	3	0	0	0	2	0	2	5	12	40	17	100	12	37	8	1	0	0	0	0	1	1	4	17	1	2
Otu00423	Bacteria	Actinobacteria	Acidimicrobiia	Actinomarinales	uncultured	uncultured_ge	253	0	0	1	1	0	1	0	1	6	9	5	3	3	9	17	11	3	0	0	0	0	0	0	2	0	1	2	15	4	10	0	1	0	0	0	0	0	0	7	9	3	2
Otu00424	Bacteria	Acidobacteria	Acidobacteriia	Acidobacteriales	uncultured	uncultured_ge	2002	0	0	0	0	0	0	2	57	94	51	7	1	14	67	90	7	35	0	0	0	0	6	30	15	7	1	35	175	54	78	37	35	35	0	0	0	12	8	13	21	109	17
Otu00425	Bacteria	Proteobacteria	Gammaproteobacteria	Xanthomonadales	Xanthomonadaceae	Luteimonas	4653	320	717	982	435	92	100	16	10	35	9	6	1	11	2	7	12	11	72	118	44	4	8	4	15	1	1	0	2	1	1	18	1	1	60	104	8	2	7	3	3	1	2
Otu00426	Bacteria	Chloroflexi	Anaerolineae	SBR1031	A4b	A4b_ge	2968	0	0	1	1	2	0	33	15	85	109	141	551	255	103	42	3	16	0	0	0	2	9	17	12	29	111	14	83	1	16	0	0	11	0	0	0	0	5	9	19	3	8
Otu00427	Bacteria	Planctomycetes	Planctomycetacia	Pirellulales	Pirellulaceae	Pirellulaceae_unclassified	4163	0	0	10	1	3	2	285	315	303	44	5	0	5	3	5	4	3	1	1	2	25	436	570	143	6	2	4	2	1	1	2	1	1	0	10	1	21	6	3	1	2	1
Otu00428	Bacteria	Acidobacteria	Thermoanaerobaculia	Thermoanaerobaculales	Thermoanaerobaculaceae	Subgroup_10	2906	49	6	3	5	7	21	74	75	129	194	144	123	52	199	65	28	19	9	3	18	10	15	10	17	27	88	78	63	16	62	57	2	4	2	1	2	15	31	31	16	3	146
Otu00429	Bacteria	Proteobacteria	Alphaproteobacteria	Tistrellales	Geminicoccaceae	uncultured	3931	11	58	69	72	52	71	181	178	144	127	296	117	69	6	22	1	41	10	13	54	30	31	38	43	61	114	46	13	8	3	5	0	2	12	46	31	41	38	1	4	1	2
Otu00430	Bacteria	Proteobacteria	Deltaproteobacteria	Desulfobacterales	Desulfobulbaceae	uncultured	2822	0	0	0	0	0	0	0	0	4	1	4	3	9	35	45	141	164	0	0	0	0	0	0	0	7	2	0	167	24	148	6	261	31	0	0	0	0	6	55	91	132	35
Otu00431	Bacteria	Actinobacteria	MB-A2-108	MB-A2-108_or	MB-A2-108_fa	MB-A2-108_ge	2825	0	0	1	8	0	1	5	78	560	167	26	3	22	42	98	4	22	0	0	0	0	13	100	47	42	2	18	215	76	97	12	3	2	0	6	0	9	3	25	16	26	4
Otu00432	Bacteria	Proteobacteria	Deltaproteobacteria	Myxococcales	BIrii41	BIrii41_ge	2389	315	155	126	24	46	78	29	3	53	10	41	67	5	1	1	4	8	130	70	55	9	11	7	18	0	0	0	0	15	0	33	0	53	147	22	1	7	7	3	3	1	1
Otu00433	Bacteria	Gemmatimonadetes	BD2-11_terrestrial_group	BD2-11_terrestrial_group_or	BD2-11_terrestrial_group_fa	BD2-11_terrestrial_group_ge	4455	0	1	5	2	6	10	87	28	289	516	216	128	150	229	233	35	47	0	1	5	3	1	7	13	160	51	98	152	29	158	113	1	11	0	6	1	2	22	64	37	15	11
Otu00434	Bacteria	Proteobacteria	Gammaproteobacteria	Betaproteobacteriales	Betaproteobacteriales_unclassified	Betaproteobacteriales_unclassified	1273	0	0	0	0	0	0	0	0	1	0	2	2	0	2	5	50	108	0	0	0	0	0	0	0	0	7	0	16	0	20	1	99	107	0	0	0	0	1	2	6	153	84
Otu00435	Bacteria	Proteobacteria	Alphaproteobacteria	Tistrellales	Geminicoccaceae	uncultured	3367	0	36	14	11	18	33	218	104	134	84	225	226	138	12	26	0	25	10	7	20	22	47	48	36	62	115	127	18	8	9	6	0	7	6	26	10	49	93	13	3	5	2
Otu00436	Bacteria	Verrucomicrobia	Verrucomicrobiae	Opitutales	Opitutaceae	Alterococcus	1506	0	53	74	31	68	40	16	18	30	11	12	21	7	18	22	66	3	18	21	54	2	6	4	7	3	10	0	6	0	22	3	13	33	6	32	9	9	4	8	28	11	18
Otu00437	Bacteria	Proteobacteria	Deltaproteobacteria	NB1-j	NB1-j_fa	NB1-j_ge	2022	0	0	0	0	0	0	1	8	20	32	43	42	67	50	78	365	35	0	0	0	1	1	2	1	33	25	39	38	14	52	16	19	9	0	0	0	9	28	32	23	20	81
Otu00438	Bacteria	Acidobacteria	Blastocatellia_(Subgroup_4)	Pyrinomonadales	Pyrinomonadaceae	RB41	4224	7	83	62	26	12	12	35	135	131	109	60	126	62	12	17	0	38	7	43	11	11	60	26	21	25	35	47	16	0	13	2	5	39	34	71	19	93	97	4	3	4	15
Otu00439	Bacteria	Chloroflexi	Anaerolineae	Anaerolineales	Anaerolineaceae	uncultured	1690	0	0	0	0	0	0	0	0	7	13	26	69	53	88	112	120	38	1	0	0	0	0	0	0	5	10	6	86	6	121	15	13	5	0	0	0	0	1	31	62	43	9
Otu00440	Bacteria	Acidobacteria	Subgroup_6	Subgroup_6_or	Subgroup_6_fa	Subgroup_6_ge	3569	1	40	26	59	84	66	254	121	92	62	66	30	7	1	7	1	7	22	25	72	65	95	49	70	45	27	42	14	0	0	3	0	1	41	96	47	51	38	3	5	3	3
Otu00441	Bacteria	Proteobacteria	Deltaproteobacteria	RCP2-54	RCP2-54_fa	RCP2-54_ge	473	0	0	0	0	0	0	0	0	1	1	6	12	3	4	4	10	8	0	0	0	0	0	0	0	0	9	0	1	0	1	0	9	8	0	0	0	0	0	3	2	175	61
Otu00442	Bacteria	Proteobacteria	Gammaproteobacteria	EPR3968-O8a-Bc78	EPR3968-O8a-Bc78_fa	EPR3968-O8a-Bc78_ge	1893	5	39	40	18	19	86	271	158	117	11	19	9	2	69	1	3	4	15	17	28	67	14	30	41	9	0	2	0	1	2	2	0	13	5	2	15	0	1	1	21	1	29
Otu00443	Bacteria	Acidobacteria	Subgroup_5	Subgroup_5_or	Subgroup_5_fa	Subgroup_5_ge	269	0	0	1	0	6	3	5	1	7	6	13	25	3	15	1	14	3	0	0	9	6	3	2	0	3	5	0	4	0	2	0	0	1	0	0	0	1	1	5	11	1	15
Otu00444	Bacteria	Planctomycetes	Planctomycetacia	Pirellulales	Pirellulaceae	uncultured	578	0	2	1	0	9	1	8	11	10	5	3	3	4	4	2	1	5	0	3	7	3	10	3	1	2	3	2	3	0	3	3	34	55	1	5	1	0	0	0	4	21	19
Otu00445	Bacteria	Proteobacteria	Deltaproteobacteria	Myxococcales	Myxococcales_unclassified	Myxococcales_unclassified	549	63	27	13	8	14	16	3	3	15	5	14	1	7	1	4	2	3	24	13	13	12	3	4	3	0	2	1	0	1	2	0	1	12	24	15	5	1	0	1	0	2	2
Otu00446	Bacteria	Planctomycetes	Planctomycetacia	Pirellulales	Pirellulaceae	Pirellulaceae_unclassified	3944	0	0	0	0	0	0	0	27	248	225	35	4	48	209	273	151	12	1	0	0	0	3	21	32	35	22	215	501	117	92	37	4	5	0	0	0	0	3	80	25	11	13
Otu00447	Bacteria	Chloroflexi	Dehalococcoidia	SAR202_clade	SAR202_clade_fa	SAR202_clade_ge	1224	0	9	8	3	8	8	31	37	73	52	18	14	27	40	70	55	7	0	1	6	4	4	14	15	7	14	3	35	11	42	6	4	2	1	4	5	8	5	16	23	5	19
Otu00448	Bacteria	Actinobacteria	MB-A2-108	MB-A2-108_or	MB-A2-108_fa	MB-A2-108_ge	3404	0	9	116	95	56	48	131	289	338	262	31	4	8	1	12	4	14	0	74	34	23	93	79	43	29	0	1	1	3	1	1	0	4	0	53	9	41	12	3	4	1	4
Otu00449	Bacteria	Chloroflexi	Anaerolineae	Anaerolineales	Anaerolineaceae	uncultured	2255	0	0	0	0	0	0	0	0	4	8	2	0	1	1	1	2	69	0	0	0	0	0	0	0	0	7	0	43	0	75	3	257	462	0	1	0	2	0	19	11	53	79
Otu00450	Bacteria	Actinobacteria	0319-7L14	0319-7L14_or	0319-7L14_fa	0319-7L14_ge	5618	83	522	162	74	115	73	174	113	220	77	68	50	31	3	13	1	21	174	169	134	58	75	54	68	4	138	5	5	1	2	2	0	3	44	74	45	44	5	8	3	5	3
Otu00451	Bacteria	Proteobacteria	Alphaproteobacteria	Tistrellales	Geminicoccaceae	uncultured	2941	4	21	30	14	38	67	172	99	152	104	241	103	49	4	12	0	31	6	8	28	47	32	33	29	58	59	21	10	2	5	1	1	4	7	16	32	37	32	5	5	1	1
Otu00452	Bacteria	Gemmatimonadetes	Gemmatimonadetes	Gemmatimonadales	Gemmatimonadaceae	uncultured	3061	3	7	15	0	52	11	39	21	122	156	112	148	103	177	70	242	39	9	6	15	3	5	15	7	28	94	3	49	13	50	14	3	6	6	3	17	16	8	25	82	16	189
Otu00453	Bacteria	Bacteroidetes	Rhodothermia	Rhodothermales	Rhodothermaceae	uncultured	1678	0	0	1	2	7	6	13	11	36	33	42	181	44	175	62	91	5	0	0	3	0	3	2	2	6	30	9	48	10	65	7	1	2	0	0	0	4	4	41	41	9	46
Otu00454	Bacteria	Bacteroidetes	Bacteroidia	Bacteroidales	SB-5	SB-5_ge	1972	0	1	0	0	0	0	0	0	0	2	1	3	1	1	1	4	12	1	0	1	0	0	0	0	0	9	0	60	0	100	1	40	469	0	2	0	0	0	9	12	34	55
Otu00455	Bacteria	Firmicutes	Clostridia	Clostridiales	Ruminococcaceae	Ruminiclostridium_1	1038	2	22	13	3	18	22	7	4	14	30	20	33	12	13	7	3	2	5	8	7	2	23	13	5	8	21	2	3	3	1	3	0	14	6	194	21	8	0	1	3	1	3
Otu00456	Bacteria	Proteobacteria	Gammaproteobacteria	Acidiferrobacterales	Acidiferrobacteraceae	Sulfurifustis	3901	0	1	0	0	1	1	1	5	60	122	36	22	33	91	185	2003	64	0	0	0	0	0	0	1	7	7	2	102	21	96	65	23	7	0	1	1	1	1	18	44	56	7
Otu00457	Bacteria	Proteobacteria	Deltaproteobacteria	Desulfobacterales	Desulfobulbaceae	uncultured	1449	0	0	1	3	3	1	29	23	67	12	4	5	4	7	6	4	10	1	1	4	12	22	12	23	9	15	2	93	6	7	0	4	23	0	11	5	8	14	5	2	51	33
Otu00458	Bacteria	Actinobacteria	Actinobacteria	Micrococcales	Microbacteriaceae	Microbacteriaceae_unclassified	1182	173	45	24	5	4	26	10	9	20	5	22	1	6	4	11	7	17	233	44	8	3	7	3	11	0	0	0	4	2	4	14	1	2	25	7	0	1	3	1	2	3	1
Otu00459	Bacteria	Bacteria_unclassified	Bacteria_unclassified	Bacteria_unclassified	Bacteria_unclassified	Bacteria_unclassified	3923	0	0	0	0	0	0	0	0	2	10	0	2	10	165	57	338	10	0	0	0	0	1	0	0	1	6	27	1193	298	227	40	5	1	0	0	0	0	0	257	131	20	14
Otu00460	Bacteria	Planctomycetes	Planctomycetacia	Pirellulales	Pirellulaceae	Pir4_lineage	1914	40	139	135	46	71	74	47	29	60	25	10	29	6	6	11	6	16	25	54	38	18	28	14	32	2	4	8	1	2	3	10	12	7	34	31	30	13	10	1	1	10	1
Otu00461	Bacteria	Actinobacteria	Thermoleophilia	Solirubrobacterales	67-14	67-14_ge	2370	1	14	19	6	9	7	72	90	177	56	21	154	104	31	13	1	35	1	9	14	20	156	89	54	8	97	70	83	3	4	3	2	3	2	8	47	20	46	7	2	3	3
Otu00462	Bacteria	Acidobacteria	Subgroup_9	Subgroup_9_or	Subgroup_9_fa	Subgroup_9_ge	2649	0	1	0	0	0	0	0	0	37	62	60	51	50	207	131	193	22	0	0	0	0	0	0	1	14	53	40	180	64	224	98	3	6	0	0	0	0	1	82	100	16	63
Otu00463	Bacteria	Acidobacteria	Acidobacteriia	Subgroup_13	Subgroup_13_fa	Subgroup_13_ge	1409	0	0	0	1	0	0	0	1	15	36	49	8	35	16	17	57	46	0	0	0	0	1	3	2	11	11	8	23	3	15	2	57	107	0	0	0	13	6	7	13	37	16
Otu00464	Bacteria	Gemmatimonadetes	Longimicrobia	Longimicrobiales	Longimicrobiaceae	Longimicrobiaceae_ge	890	3	16	22	16	12	24	77	39	69	22	11	4	3	13	10	15	5	0	1	4	7	11	12	8	2	16	2	22	4	20	3	0	2	1	21	5	10	4	1	5	5	3
Otu00465	Bacteria	Firmicutes	Clostridia	Clostridiales	Lachnospiraceae	Lachnospiraceae_unclassified	607	2	7	5	0	10	8	9	6	10	14	16	15	8	5	7	5	2	3	1	5	3	12	8	5	5	8	3	5	0	34	8	6	28	6	50	7	10	7	9	24	11	6
Otu00466	Bacteria	Planctomycetes	Planctomycetacia	Planctomycetales	Gimesiaceae	uncultured	2976	0	0	2	4	4	5	53	92	182	132	96	60	52	82	102	55	25	1	6	8	14	40	69	23	25	79	104	126	22	39	23	2	2	0	6	6	20	23	27	17	6	11
Otu00467	Archaea	Thaumarchaeota	Nitrososphaeria	Nitrososphaerales	Nitrososphaeraceae	Candidatus_Nitrocosmicus	7180	1283	582	198	34	24	80	2	13	204	20	92	21	9	1	14	2	6	473	172	40	17	28	21	46	1	0	1	2	1	2	16	1	9	593	62	10	2	3	5	4	6	2
Otu00468	Bacteria	Actinobacteria	Thermoleophilia	Gaiellales	Gaiellaceae	Gaiella	1470	0	21	21	14	19	15	50	30	75	106	32	19	7	11	3	3	8	4	23	44	14	51	34	28	16	3	5	17	4	3	0	1	1	0	21	60	29	2	1	0	1	2
Otu00469	Bacteria	Chloroflexi	Anaerolineae	Anaerolineales	Anaerolineaceae	uncultured	2138	0	0	1	3	8	6	30	63	167	90	55	90	19	48	35	46	42	0	0	1	1	21	17	5	15	58	7	79	30	97	17	13	6	0	1	0	3	2	23	53	79	14
Otu00470	Bacteria	Proteobacteria	Gammaproteobacteria	PLTA13	PLTA13_fa	PLTA13_ge	3347	0	0	0	1	0	0	6	15	28	182	247	30	39	55	106	18	109	0	0	0	0	2	9	5	68	3	4	21	14	71	52	72	59	0	2	0	16	0	8	12	13	8
Otu00471	Bacteria	Bacteria_unclassified	Bacteria_unclassified	Bacteria_unclassified	Bacteria_unclassified	Bacteria_unclassified	2146	0	0	0	0	0	0	0	0	198	477	73	32	39	23	50	123	186	0	0	0	0	0	3	8	45	13	32	71	9	17	3	4	70	0	0	0	0	0	32	13	32	8
Otu00472	Bacteria	Proteobacteria	Deltaproteobacteria	SAR324_clade(Marine_group_B)	SAR324_clade(Marine_group_B)_fa	SAR324_clade(Marine_group_B)_ge	1528	0	0	0	0	0	0	0	0	19	28	52	195	77	234	66	130	24	0	0	0	0	0	0	0	1	40	16	38	8	42	9	2	3	0	0	0	1	3	29	50	1	14
Otu00473	Bacteria	Hydrogenedentes	Hydrogenedentia	Hydrogenedentiales	Hydrogenedensaceae	Hydrogenedensaceae_ge	1215	0	0	0	0	0	0	1	0	3	18	15	28	33	76	69	68	22	0	0	0	0	0	0	0	8	17	44	80	15	54	9	1	1	0	0	0	0	2	43	66	10	31
Otu00474	Bacteria	Proteobacteria	Gammaproteobacteria	Pseudomonadales	Pseudomonadaceae	Pseudomonas	2376	37	47	10	2	15	6	1	0	40	9	3	5	3	11	23	68	16	12	7	8	3	0	1	0	0	0	1	2	3	1	39	0	1	14	13	3	1	8	5	14	3	4
Otu00475	Bacteria	Proteobacteria	Deltaproteobacteria	Myxococcales	Haliangiaceae	Haliangium	1152	0	3	0	0	5	2	11	9	19	18	30	47	62	97	89	52	12	0	1	1	2	1	5	2	1	11	7	33	7	60	5	8	3	0	0	0	1	6	34	50	19	27
Otu00476	Bacteria	Acidobacteria	Subgroup_6	Subgroup_6_or	Subgroup_6_fa	Subgroup_6_ge	4813	8	240	92	69	309	120	180	57	81	36	62	334	98	1	3	6	12	76	66	150	43	36	39	41	9	135	9	1	1	2	0	0	1	35	66	67	19	24	2	2	1	0
Otu00477	Bacteria	Rokubacteria	NC10	Rokubacteriales	Rokubacteriales_fa	Rokubacteriales_ge	2527	0	1	4	6	0	3	6	106	68	81	17	30	28	103	38	5	5	0	2	1	1	28	51	10	48	7	7	19	9	18	14	2	12	0	9	17	80	2	0	0	9	9
Otu00478	Bacteria	Chloroflexi	Anaerolineae	SBR1031	SBR1031_fa	SBR1031_ge	3362	0	1	0	0	0	0	4	10	12	11	103	433	232	60	183	88	31	0	0	1	2	0	2	0	14	184	21	32	5	85	22	27	9	0	0	0	1	3	67	52	32	20
Otu00479	Bacteria	Proteobacteria	Gammaproteobacteria	Acidiferrobacterales	Acidiferrobacteraceae	Sulfurifustis	228	0	0	0	0	0	0	0	0	5	7	4	6	3	7	5	8	14	0	0	0	0	0	0	0	4	8	0	4	0	15	0	7	6	0	0	0	0	1	4	6	4	7
Otu00480	Bacteria	Bacteroidetes	Rhodothermia	Rhodothermales	Rhodothermaceae	uncultured	3945	0	19	39	75	448	386	353	149	172	89	71	6	25	3	10	1	14	1	4	130	31	22	30	26	21	41	3	2	1	1	2	0	2	1	16	4	7	0	4	12	0	1
Otu00481	Bacteria	Acidobacteria	Acidobacteriia	Solibacterales	Solibacteraceae_(Subgroup_3)	Solibacteraceae_(Subgroup_3)_unclassified	2370	7	93	35	15	37	13	38	43	43	31	84	72	35	4	12	6	6	35	38	30	22	42	20	16	4	80	65	10	5	3	2	34	1	48	25	18	13	33	3	5	2	2
Otu00482	Bacteria	Gemmatimonadetes	Longimicrobia	Longimicrobiales	Longimicrobiaceae	Longimicrobiaceae_ge	5160	29	566	618	383	303	322	137	46	101	25	19	11	9	1	9	1	12	56	106	108	30	25	24	46	5	0	1	1	2	2	3	0	4	42	113	52	13	4	1	2	1	3
Otu00483	Bacteria	Planctomycetes	Planctomycetacia	Pirellulales	Pirellulaceae	Pir4_lineage	1497	28	98	74	20	26	30	13	44	32	16	11	19	9	0	2	2	4	38	59	47	22	31	15	30	7	10	7	0	1	0	0	0	0	27	49	34	18	11	4	0	0	1
Otu00484	Archaea	Thaumarchaeota	Nitrososphaeria	Nitrososphaerales	Nitrososphaeraceae	Candidatus_Nitrososphaera	1666	0	0	2	3	1	7	2	72	169	249	13	1	9	25	19	3	7	0	0	0	5	21	39	23	24	0	22	73	9	19	1	4	11	0	6	2	12	18	9	8	10	55
Otu00485	Bacteria	Proteobacteria	Deltaproteobacteria	Sva0485	Sva0485_fa	Sva0485_ge	2604	0	0	0	0	0	0	0	0	1	2	1	1	0	3	3	2	1	0	0	0	0	0	0	0	0	9	0	108	1	202	1	15	219	0	0	0	0	0	33	15	2	29
Otu00486	Bacteria	Actinobacteria	Actinobacteria	Micrococcales	Promicromonosporaceae	Promicromonospora	2721	80	103	215	99	38	44	37	59	152	24	111	34	45	16	107	3	25	17	33	13	10	24	6	12	28	83	0	8	1	3	3	0	0	6	91	7	10	1	9	5	4	0
Otu00487	Bacteria	Actinobacteria	Actinobacteria	Streptomycetales	Streptomycetaceae	Streptomyces	2919	68	121	313	42	85	389	47	25	226	3	24	25	5	0	10	1	10	31	24	112	17	56	27	65	2	12	0	1	0	3	10	1	1	12	19	16	3	0	1	9	0	1
Otu00488	Bacteria	Acidobacteria	Subgroup_5	Subgroup_5_or	Subgroup_5_fa	Subgroup_5_ge	2994	0	0	0	0	0	0	2	13	174	100	42	17	38	207	136	369	17	0	0	0	0	1	18	10	22	13	38	195	55	130	102	5	6	0	0	0	0	21	47	80	11	84
Otu00489	Bacteria	Proteobacteria	Gammaproteobacteria	Betaproteobacteriales	Rhodocyclaceae	Dechloromonas	2352	15	33	15	6	8	14	17	7	41	17	46	48	40	167	203	134	6	8	5	32	4	3	14	5	3	12	0	64	3	9	1	2	3	48	57	5	19	8	14	38	15	19
Otu00490	Bacteria	Acidobacteria	Subgroup_6	Subgroup_6_unclassified	Subgroup_6_unclassified	Subgroup_6_unclassified	254	0	2	2	1	1	0	0	0	3	9	17	24	16	5	15	11	9	0	1	0	0	0	0	0	0	4	2	7	0	7	0	1	0	0	1	0	0	0	3	1	7	1
Otu00491	Bacteria	Chloroflexi	Anaerolineae	SBR1031	SBR1031_unclassified	SBR1031_unclassified	2600	1	1	2	2	0	0	1	0	1	3	7	2	2	5	3	2	14	0	0	1	0	0	0	0	1	6	0	50	0	101	5	124	483	1	2	1	2	0	13	10	3	44
Otu00492	Bacteria	Proteobacteria	Alphaproteobacteria	Rhizobiales	Hyphomicrobiaceae	Pedomicrobium	3057	0	9	3	0	0	2	45	117	81	248	487	71	61	12	26	6	9	1	0	3	15	20	19	12	71	52	7	16	1	5	3	6	18	0	1	17	40	21	11	18	21	112
Otu00493	Bacteria	Gemmatimonadetes	Gemmatimonadetes	Gemmatimonadales	Gemmatimonadaceae	uncultured	5369	0	11	25	23	9	4	161	108	133	264	359	463	236	39	55	3	142	0	20	7	14	23	29	30	121	15	42	53	11	32	3	0	16	0	169	16	155	99	25	17	7	6
Otu00494	Bacteria	Proteobacteria	Alphaproteobacteria	Rhizobiales	Rhizobiales_Incertae_Sedis	Bauldia	1273	0	0	1	2	0	5	28	19	82	89	38	61	16	25	64	46	10	0	0	4	2	7	13	4	14	31	11	53	16	36	5	0	2	0	1	2	6	10	25	24	21	28
Otu00495	Bacteria	Gemmatimonadetes	S0134_terrestrial_group	S0134_terrestrial_group_or	S0134_terrestrial_group_fa	S0134_terrestrial_group_ge	1773	1	23	69	100	180	155	54	44	45	4	12	28	8	2	2	3	8	0	13	115	44	13	8	29	3	5	1	2	1	1	2	1	3	0	41	11	10	2	1	2	0	1
Otu00496	Bacteria	Gemmatimonadetes	Gemmatimonadetes	Gemmatimonadales	Gemmatimonadaceae	uncultured	1717	18	8	3	3	1	1	53	140	248	43	9	17	22	9	4	1	17	0	3	2	1	2	28	19	9	8	64	53	4	7	6	0	11	81	15	5	63	31	4	5	3	1
Otu00497	Bacteria	Proteobacteria	Gammaproteobacteria	Betaproteobacteriales	Burkholderiaceae	uncultured	2829	20	25	11	6	6	6	13	40	80	51	43	109	89	48	69	27	55	20	14	4	2	26	27	14	5	30	9	23	2	41	4	3	67	157	11	5	27	17	7	6	146	19
Otu00498	Bacteria	Bacteroidetes	Bacteroidia	Bacteroidales	Prolixibacteraceae	uncultured	1590	0	0	0	0	0	0	0	0	1	1	0	2	1	4	0	3	27	0	0	0	0	0	0	0	0	1	0	3	0	6	1	156	38	0	0	0	0	0	5	37	106	33
Otu00499	Bacteria	Bacteroidetes	Ignavibacteria	SJA-28	SJA-28_fa	SJA-28_ge	1754	4	27	23	4	12	20	24	36	68	84	44	188	29	66	36	55	14	5	3	18	7	11	9	5	10	41	13	33	12	41	8	7	3	0	0	4	6	5	16	18	18	43
Otu00500	Bacteria	Proteobacteria	Alphaproteobacteria	Rhizobiales	Xanthobacteraceae	uncultured	3301	1	2	8	2	2	2	47	58	120	96	67	32	47	69	92	120	18	1	0	1	9	21	27	21	21	30	12	94	34	99	24	29	84	0	6	5	12	20	32	65	89	229
Otu00501	Archaea	Thaumarchaeota	Nitrososphaeria	Nitrososphaerales	Nitrososphaeraceae	Nitrososphaeraceae_ge	4881	6	79	72	82	4	11	161	255	254	119	84	169	77	50	27	6	36	20	71	20	23	159	119	68	33	151	135	82	14	5	6	3	2	18	86	23	61	83	21	6	9	5
Otu00502	Bacteria	Chloroflexi	KD4-96	KD4-96_or	KD4-96_fa	KD4-96_ge	1613	5	14	18	6	0	3	23	47	155	60	12	40	33	17	11	3	23	2	13	4	5	15	42	12	5	8	51	112	27	11	4	5	4	2	5	8	17	54	11	2	7	1
Otu00503	Bacteria	Chloroflexi	Anaerolineae	SBR1031	SBR1031_fa	SBR1031_ge	1719	0	0	0	0	0	0	0	0	2	1	2	3	12	98	22	311	160	0	0	0	0	0	0	0	0	6	1	122	2	59	12	36	43	0	0	0	0	0	26	86	200	6
Otu00504	Bacteria	Proteobacteria	Alphaproteobacteria	Sphingomonadales	Sphingomonadaceae	Sphingomonas	1419	149	148	120	25	2	18	1	19	21	5	23	7	11	4	11	5	6	69	28	8	2	1	2	7	2	1	0	3	0	2	6	0	5	35	10	6	4	0	1	0	1	2
Otu00505	Bacteria	Proteobacteria	Gammaproteobacteria	Gammaproteobacteria_unclassified	Gammaproteobacteria_unclassified	Gammaproteobacteria_unclassified	3565	0	36	47	44	27	41	206	46	275	113	48	109	9	4	6	1	8	8	30	58	44	91	103	64	31	347	2	6	1	6	7	0	8	1	46	32	103	8	2	1	0	3
Otu00506	Bacteria	Chloroflexi	Anaerolineae	SBR1031	A4b	A4b_ge	3558	0	1	3	3	0	0	4	16	97	187	199	258	126	163	98	72	38	0	1	0	1	5	10	4	25	241	40	107	3	29	1	1	10	0	3	2	45	25	38	20	14	14
Otu00507	Bacteria	Gemmatimonadetes	Gemmatimonadetes	Gemmatimonadales	Gemmatimonadaceae	uncultured	2805	0	0	0	0	0	0	0	0	5	5	0	0	16	286	160	208	102	0	0	0	0	0	0	0	4	5	38	185	108	375	30	17	18	0	0	0	0	0	48	66	53	9
Otu00508	Bacteria	Chloroflexi	OLB14	OLB14_or	OLB14_fa	OLB14_ge	2709	0	7	10	22	18	15	42	56	94	122	132	204	64	144	73	63	11	0	3	23	4	17	17	10	32	114	7	63	19	30	3	0	4	0	15	17	17	22	21	32	12	47
Otu00509	Bacteria	Proteobacteria	Deltaproteobacteria	Myxococcales	Nannocystaceae	Nannocystaceae_unclassified	1531	0	21	12	19	43	45	40	9	22	16	18	15	8	5	36	11	17	10	4	20	5	5	4	2	29	30	4	25	27	90	20	11	25	10	7	29	3	3	20	24	1	2
Otu00510	Bacteria	Actinobacteria	Acidimicrobiia	Microtrichales	uncultured	uncultured_ge	2230	130	193	459	177	14	38	12	4	20	8	23	4	2	0	3	0	4	46	72	19	6	7	2	9	0	35	0	0	0	0	6	2	1	65	68	1	5	0	0	1	1	0
Otu00511	Bacteria	Proteobacteria	Alphaproteobacteria	Rhizobiales	Methyloligellaceae	Methyloceanibacter	3124	2	48	96	57	268	191	42	59	157	48	20	69	5	39	12	31	35	4	40	125	29	28	35	40	15	3	0	22	10	29	12	9	29	0	15	116	9	3	7	32	9	6
Otu00512	Bacteria	Proteobacteria	Alphaproteobacteria	Rhizobiales	Hyphomicrobiaceae	Hyphomicrobium	500	6	40	13	3	1	5	8	23	21	17	8	8	3	6	4	4	1	7	3	5	1	14	12	6	2	3	2	5	2	2	3	3	3	7	7	4	2	1	2	1	3	4
Otu00513	Bacteria	Actinobacteria	Actinobacteria	Frankiales	Geodermatophilaceae	Blastococcus	3711	561	291	81	28	9	41	28	41	79	22	74	11	16	0	24	5	12	200	81	24	5	23	11	26	2	6	3	2	1	1	13	2	6	223	44	7	15	3	2	2	8	2
Otu00514	Bacteria	Bacteroidetes	Bacteroidia	Sphingobacteriales	env.OPS_17	env.OPS_17_ge	1655	108	88	77	59	129	85	93	66	94	29	35	27	14	7	8	22	3	18	17	14	4	5	7	4	0	5	0	0	0	0	4	0	3	52	29	17	8	2	0	5	1	0
Otu00515	Bacteria	Bacteroidetes	Ignavibacteria	Ignavibacteriales	Ignavibacteriaceae	Ignavibacterium	1803	0	0	0	0	1	0	0	0	3	2	1	0	0	8	6	65	37	0	0	0	0	0	0	0	0	1	0	7	0	35	1	38	215	0	0	0	0	6	8	27	193	338
Otu00516	Bacteria	Proteobacteria	Alphaproteobacteria	Sphingomonadales	Sphingomonadaceae	Sphingomonadaceae_unclassified	4359	0	0	0	0	0	0	2	15	123	50	184	1179	144	342	84	92	29	0	0	1	0	0	4	4	26	51	1	51	32	85	3	4	9	0	0	0	4	24	57	140	113	37
Otu00517	Bacteria	Planctomycetes	Phycisphaerae	Phycisphaerales	Phycisphaeraceae	uncultured	2505	0	0	2	3	30	40	57	42	67	91	138	103	58	106	121	120	10	0	2	19	8	9	6	1	25	45	11	72	28	99	25	1	6	0	2	2	5	11	19	41	6	13
Otu00518	Bacteria	Actinobacteria	Actinobacteria	Micromonosporales	Micromonosporaceae	Virgisporangium	1578	379	97	61	1	1	22	0	1	22	0	44	1	2	0	0	0	3	87	46	9	0	6	0	10	0	0	0	0	0	0	7	0	1	138	27	1	0	0	0	0	2	0
Otu00519	Bacteria	Chloroflexi	Anaerolineae	Ardenticatenales	uncultured	uncultured_ge	1406	0	3	3	0	0	0	14	13	11	10	27	72	17	31	22	43	30	0	2	0	2	4	3	3	3	15	0	28	4	46	3	3	11	0	0	2	1	2	20	57	86	19
Otu00520	Bacteria	Bacteroidetes	Rhodothermia	Rhodothermales	Rhodothermaceae	uncultured	2945	0	0	0	0	5	48	222	89	219	175	207	302	192	97	44	9	9	0	0	2	15	14	33	27	22	304	4	30	2	17	0	0	6	0	0	1	3	12	12	12	4	15
Otu00521	Bacteria	Bacteroidetes	Bacteroidia	Cytophagales	Microscillaceae	uncultured	3636	0	0	0	0	0	0	3	28	204	243	274	269	49	448	42	37	11	0	0	0	0	1	29	0	17	114	48	228	13	91	22	3	8	0	0	0	5	30	42	156	13	395
Otu00522	Bacteria	Proteobacteria	Deltaproteobacteria	Desulfobacterales	Desulfobulbaceae	Desulfobulbaceae_unclassified	212	0	0	0	0	1	1	0	0	5	0	1	4	3	10	7	3	1	0	0	0	0	0	0	0	1	9	0	7	0	4	0	13	1	0	1	0	0	0	5	5	8	0
Otu00523	Bacteria	Acidobacteria	Blastocatellia_(Subgroup_4)	Blastocatellales	Blastocatellaceae	Blastocatellaceae_unclassified	2306	7	74	108	74	69	50	59	70	110	48	93	152	50	5	28	5	13	3	17	69	13	22	27	17	23	108	1	7	4	6	2	2	3	6	19	11	8	17	4	5	4	3
Otu00524	Bacteria	Acidobacteria	Thermoanaerobaculia	Thermoanaerobaculales	Thermoanaerobaculaceae	Subgroup_10	3238	1	0	0	0	0	1	0	0	1	2	0	0	1	3	31	193	852	0	0	0	0	0	0	0	0	1	0	1	0	30	18	357	172	0	0	0	0	0	9	19	380	6
Otu00525	Bacteria	Actinobacteria	Acidimicrobiia	uncultured	uncultured_fa	uncultured_ge	966	18	55	30	19	26	13	47	12	22	34	31	11	10	11	5	5	2	15	21	6	10	3	3	9	2	6	0	10	2	5	1	1	5	21	9	5	7	6	2	1	3	0
Otu00526	Bacteria	Chloroflexi	Dehalococcoidia	S085	S085_fa	S085_ge	981	2	0	1	0	1	2	11	31	32	30	8	48	34	28	22	38	25	0	3	2	0	9	9	1	5	15	18	31	8	22	12	5	8	1	2	0	10	15	6	13	10	14
Otu00527	Bacteria	Chloroflexi	Dehalococcoidia	S085	S085_fa	S085_ge	1984	0	0	1	1	0	0	31	69	115	75	15	57	49	65	53	4	52	0	0	0	5	39	55	18	12	9	60	97	15	52	5	0	9	0	3	1	29	41	14	6	10	5
Otu00528	Bacteria	Gemmatimonadetes	BD2-11_terrestrial_group	BD2-11_terrestrial_group_or	BD2-11_terrestrial_group_fa	BD2-11_terrestrial_group_ge	1265	0	1	0	0	1	2	0	2	6	9	18	39	15	11	8	17	89	1	0	3	1	0	2	0	0	10	1	8	6	28	4	106	85	0	0	1	0	4	4	17	98	17
Otu00529	Bacteria	Actinobacteria	Actinobacteria	Micrococcales	Microbacteriaceae	Agromyces	2146	17	122	160	69	12	9	15	149	65	24	27	8	13	3	8	7	9	54	48	44	17	64	40	88	24	9	5	4	0	10	4	1	1	13	40	23	14	3	6	1	2	1
Otu00530	Bacteria	Proteobacteria	Alphaproteobacteria	Caulobacterales	Parvularculaceae	Parvularculaceae_unclassified	2136	0	0	0	0	0	0	4	2	7	132	40	15	26	244	114	308	11	0	0	0	0	0	0	2	12	15	9	153	17	144	9	1	4	0	0	0	0	5	21	154	15	13
Otu00531	Bacteria	Acidobacteria	Subgroup_15	Subgroup_15_or	Subgroup_15_fa	Subgroup_15_ge	2371	0	0	0	0	0	0	0	6	108	74	59	52	77	93	95	242	21	0	0	0	0	3	11	6	20	49	41	128	20	94	39	2	6	0	0	2	5	5	37	38	43	9
Otu00532	Bacteria	Gemmatimonadetes	BD2-11_terrestrial_group	BD2-11_terrestrial_group_or	BD2-11_terrestrial_group_fa	BD2-11_terrestrial_group_ge	1341	0	25	16	17	13	8	12	25	52	34	23	17	30	55	52	46	15	1	9	2	3	6	13	6	19	17	8	50	14	55	9	12	7	0	8	8	10	16	25	24	16	0
Otu00533	Bacteria	Proteobacteria	Deltaproteobacteria	Myxococcales	bacteriap25	bacteriap25_ge	2996	1	0	5	2	3	9	1	45	277	140	45	54	39	70	75	13	30	0	0	29	16	15	55	26	25	265	32	141	28	57	12	2	7	0	2	16	20	34	26	30	15	4
Otu00534	Bacteria	Proteobacteria	Deltaproteobacteria	Desulfobacterales	Desulfobulbaceae	Desulfobulbaceae_unclassified	1851	0	0	0	0	0	7	42	34	38	32	46	26	19	54	43	46	27	0	0	0	0	5	1	2	11	11	1	130	53	177	5	11	4	0	1	0	1	2	16	37	70	6
Otu00535	Bacteria	Bacteria_unclassified	Bacteria_unclassified	Bacteria_unclassified	Bacteria_unclassified	Bacteria_unclassified	196	0	0	0	0	0	0	1	1	3	7	2	10	6	10	10	11	2	0	0	0	0	0	0	0	0	7	0	6	0	15	0	0	2	0	0	0	1	0	4	12	1	12
Otu00536	Bacteria	Bacteroidetes	Bacteroidia	Cytophagales	Cyclobacteriaceae	uncultured	2803	0	0	0	0	0	1	0	0	2	1	36	89	98	18	37	45	184	0	0	0	0	0	0	0	1	80	22	71	3	40	16	80	142	0	0	0	0	3	10	13	163	28
Otu00537	Bacteria	Proteobacteria	Deltaproteobacteria	Myxococcales	Archangiaceae	Archangium	2670	263	146	8	15	9	32	1	0	13	4	270	5	2	0	19	1	5	262	292	11	4	1	6	8	0	1	0	0	1	0	10	0	6	206	155	1	0	5	1	1	0	1
Otu00538	Archaea	Thaumarchaeota	Nitrososphaeria	Nitrososphaerales	Nitrososphaeraceae	Candidatus_Nitrososphaera	1384	7	57	42	46	5	7	27	49	63	38	10	9	8	0	6	1	5	11	45	11	8	32	24	14	2	23	12	2	0	3	0	1	4	25	90	7	6	8	0	1	1	1
Otu00539	Bacteria	Proteobacteria	Deltaproteobacteria	Myxococcales	BIrii41	BIrii41_ge	2403	26	40	39	22	109	78	15	41	57	54	28	83	24	89	13	133	20	22	31	58	19	13	7	16	10	46	0	10	3	30	8	9	24	36	1	17	24	9	11	24	14	5
Otu00540	Bacteria	Acidobacteria	Subgroup_25	Subgroup_25_or	Subgroup_25_fa	Subgroup_25_ge	2311	0	76	106	78	17	22	34	48	34	51	19	10	9	3	8	2	10	1	122	34	14	28	22	22	28	20	9	5	0	3	1	0	2	2	86	16	35	22	6	6	4	3
Otu00541	Bacteria	Proteobacteria	Alphaproteobacteria	Rhizobiales	Devosiaceae	Devosiaceae_unclassified	2893	34	83	223	158	136	89	109	86	129	73	21	21	17	6	25	9	31	39	50	60	21	38	18	32	1	12	3	15	15	20	3	1	7	12	30	22	1	18	11	9	12	4
Otu00542	Bacteria	Chloroflexi	Anaerolineae	SBR1031	A4b	A4b_ge	2828	0	0	0	0	0	0	0	0	8	15	19	43	93	121	244	213	29	0	0	0	0	0	0	0	2	9	17	68	7	199	14	3	2	0	0	0	0	0	109	210	25	69
Otu00543	Bacteria	Proteobacteria	Gammaproteobacteria	JTB23	JTB23_fa	JTB23_ge	1182	1	11	3	0	0	3	5	4	48	40	79	62	30	38	47	21	12	1	4	0	0	0	3	2	6	72	0	75	6	61	3	6	2	3	3	0	0	3	14	34	3	19
Otu00544	Bacteria	Planctomycetes	Phycisphaerae	Tepidisphaerales	CPla-3_termite_group	CPla-3_termite_group_ge	1086	9	37	20	9	23	15	37	19	37	21	15	17	11	12	8	20	17	20	12	6	2	14	13	6	13	32	1	16	8	11	6	11	5	34	19	5	10	7	9	14	9	3
Otu00545	Bacteria	Epsilonbacteraeota	Campylobacteria	Campylobacterales	Thiovulaceae	Sulfurimonas	2061	1	0	0	0	0	0	0	0	19	3	32	12	27	8	39	37	413	0	0	0	0	0	0	0	6	0	0	36	1	124	1	4	3	0	0	0	0	4	47	107	38	42
Otu00546	Bacteria	Proteobacteria	Gammaproteobacteria	Cellvibrionales	Microbulbiferaceae	Microbulbifer	2462	0	1	2	4	4	11	45	39	122	100	182	100	163	86	122	15	17	0	0	5	5	5	20	8	32	35	2	54	31	58	0	2	14	0	2	3	1	4	46	41	12	34
Otu00547	Bacteria	Chloroflexi	Anaerolineae	SBR1031	A4b	A4b_ge	1196	0	0	1	1	0	1	9	3	13	56	68	137	43	67	22	44	11	0	0	0	0	3	3	2	9	29	4	36	4	20	2	0	3	0	2	0	6	8	8	8	5	37
Otu00548	Bacteria	Proteobacteria	Alphaproteobacteria	Rhodospirillales	Magnetospiraceae	Magnetovibrio	2657	0	0	0	0	0	0	0	0	0	1	0	3	5	5	2	3	8	0	0	0	0	0	0	0	0	3	0	12	2	3	1	7	51	0	0	0	0	0	2	2	49	5
Otu00549	Bacteria	Bacteroidetes	Bacteroidia	Bacteroidales	Bacteroidales_unclassified	Bacteroidales_unclassified	1541	0	0	0	0	0	0	0	0	11	23	13	23	6	43	4	98	26	0	0	0	0	0	0	0	4	4	0	17	7	17	18	218	153	0	0	0	0	1	8	21	19	7
Otu00550	Bacteria	Bacteroidetes	Bacteroidia	Chitinophagales	Saprospiraceae	Saprospiraceae_unclassified	4034	0	18	152	95	21	11	55	53	165	111	183	358	107	72	82	40	46	0	14	5	7	14	20	13	29	271	14	34	5	40	9	179	62	0	6	9	13	30	20	19	24	17
Otu00551	Bacteria	Proteobacteria	Gammaproteobacteria	Betaproteobacteriales	TRA3-20	TRA3-20_ge	201	0	0	0	1	1	4	3	6	4	2	10	2	3	5	8	7	2	0	2	0	0	1	1	0	1	1	0	4	0	0	1	0	0	0	3	0	5	0	0	0	0	3
Otu00552	Bacteria	Chloroflexi	JG30-KF-CM66	JG30-KF-CM66_or	JG30-KF-CM66_fa	JG30-KF-CM66_ge	758	14	14	10	12	2	5	14	18	43	26	15	7	7	16	23	34	12	5	3	0	1	2	9	4	2	6	3	23	8	35	9	6	11	3	3	1	4	1	13	8	7	7
Otu00553	Bacteria	Actinobacteria	Thermoleophilia	Solirubrobacterales	67-14	67-14_ge	730	52	58	29	8	6	8	1	16	21	26	12	18	8	10	15	2	4	20	10	3	3	3	4	4	2	2	3	5	4	9	2	2	5	20	12	3	1	1	4	1	2	1
Otu00554	Bacteria	Proteobacteria	Alphaproteobacteria	Azospirillales	Azospirillaceae	Skermanella	310	47	24	18	3	0	4	0	0	4	0	8	0	1	0	2	0	1	16	9	1	1	1	1	6	0	0	0	0	0	0	1	0	0	27	5	2	0	0	0	0	0	0
Otu00555	Bacteria	Proteobacteria	Gammaproteobacteria	KI89A_clade	KI89A_clade_fa	KI89A_clade_ge	2825	0	9	6	8	544	597	15	9	24	0	2	0	7	0	1	0	7	0	0	221	16	1	5	15	0	0	0	1	0	0	0	0	0	1	3	90	9	1	0	0	1	1
Otu00556	Bacteria	Planctomycetes	Planctomycetacia	Pirellulales	Pirellulaceae	Pir4_lineage	1321	0	0	0	0	0	1	3	48	75	318	17	2	10	39	22	1	3	0	0	0	1	51	7	51	35	2	21	65	22	12	1	0	3	0	0	3	19	0	1	4	2	2
Otu00557	Bacteria	Chloroflexi	Anaerolineae	Anaerolineales	Anaerolineaceae	uncultured	2238	0	0	0	0	0	0	0	0	14	45	170	222	216	107	57	33	10	0	0	0	0	0	1	0	23	68	24	83	7	56	2	1	8	0	0	0	0	10	42	27	9	65
Otu00558	Bacteria	Planctomycetes	Planctomycetacia	Planctomycetales	Planctomycetales_unclassified	Planctomycetales_unclassified	1952	0	12	17	10	48	49	155	71	73	51	20	28	4	0	3	0	4	5	16	42	26	30	27	24	23	109	16	2	0	0	0	0	2	2	46	22	33	21	1	2	0	2
Otu00559	Bacteria	Chloroflexi	Anaerolineae	Anaerolineales	Anaerolineaceae	Anaerolinea	2201	106	77	5	1	1	8	0	1	15	1	41	0	2	1	4	0	0	446	101	10	5	5	3	15	0	1	0	0	0	1	7	0	1	253	20	0	5	1	3	0	4	4
Otu00560	Bacteria	Acidobacteria	Subgroup_15	Subgroup_15_or	Subgroup_15_fa	Subgroup_15_ge	1106	0	0	2	0	7	4	24	9	43	36	11	13	18	54	49	50	24	0	0	2	1	5	15	8	8	18	25	45	13	64	19	9	18	0	1	2	1	0	16	21	11	8
Otu00561	Bacteria	Proteobacteria	Deltaproteobacteria	Desulfobacterales	Desulfobulbaceae	uncultured	2361	0	0	0	0	0	0	0	0	0	6	0	0	0	2	0	6	139	0	0	0	0	0	0	0	0	0	0	5	1	15	0	511	118	0	0	0	0	0	6	12	332	482
Otu00562	Bacteria	Acidobacteria	Thermoanaerobaculia	Thermoanaerobaculales	Thermoanaerobaculaceae	Subgroup_10	1733	0	3	12	7	6	7	52	38	26	39	72	72	70	8	15	15	35	0	2	14	16	28	7	16	34	65	32	33	7	3	4	4	8	1	12	22	70	58	8	5	5	3
Otu00563	Bacteria	Proteobacteria	Gammaproteobacteria	Betaproteobacteriales	Methylophilaceae	MM2	2400	0	0	1	0	0	0	0	3	26	10	3	1	12	43	100	50	47	2	1	2	0	2	12	6	3	5	2	90	23	134	3	58	8	3	1	2	0	1	90	165	29	7
Otu00564	Bacteria	Proteobacteria	Gammaproteobacteria	KI89A_clade	KI89A_clade_fa	KI89A_clade_ge	1451	0	1	26	41	48	94	87	33	70	51	78	40	16	14	5	0	7	0	3	92	14	10	7	18	15	4	0	2	0	1	0	1	1	0	12	11	33	3	1	1	1	0
Otu00565	Bacteria	Latescibacteria	Latescibacteria_cl	Latescibacteria_or	Latescibacteria_fa	Latescibacteria_ge	1142	0	0	0	0	0	0	1	3	20	22	32	137	78	85	50	33	12	0	0	0	0	2	5	0	6	21	10	51	5	35	12	2	6	0	0	0	0	3	12	12	9	4
Otu00566	Bacteria	Acidobacteria	Subgroup_17	Subgroup_17_or	Subgroup_17_fa	Subgroup_17_ge	1591	0	0	0	0	0	2	4	4	19	63	39	102	29	98	79	107	20	0	0	0	0	1	3	7	18	18	24	59	36	107	56	7	1	0	0	0	1	5	54	68	7	5
Otu00567	Bacteria	Actinobacteria	Acidimicrobiia	Actinomarinales	uncultured	uncultured_ge	3138	7	210	283	280	48	57	42	91	139	58	24	4	15	9	17	5	8	47	143	34	32	34	38	26	12	6	2	9	9	10	6	0	1	2	33	2	4	1	6	5	0	2
Otu00568	Bacteria	Proteobacteria	Alphaproteobacteria	Puniceispirillales	EF100-94H03	EF100-94H03_ge	2387	0	0	3	2	3	10	26	35	182	193	119	83	43	109	61	105	11	0	0	2	7	7	30	8	37	86	6	77	17	70	5	2	2	0	2	1	31	19	35	67	10	101
Otu00569	Bacteria	Acidobacteria	Subgroup_6	Subgroup_6_or	Subgroup_6_fa	Subgroup_6_ge	1100	0	0	0	0	0	2	13	5	67	46	14	4	15	86	33	100	11	0	0	0	0	0	12	4	5	8	19	37	12	28	21	2	0	0	0	0	1	2	18	23	9	173
Otu00570	Bacteria	Actinobacteria	Thermoleophilia	Gaiellales	uncultured	uncultured_ge	2028	0	3	4	4	0	1	21	195	269	93	13	8	11	127	70	3	9	0	2	0	0	123	114	35	6	3	6	74	29	34	6	0	6	4	18	0	6	1	6	6	13	2
Otu00571	Bacteria	Nitrospinae	Nitrospinia	Nitrospinales	Nitrospinaceae	LS-NOB	2885	1	0	0	0	0	0	0	0	1	1	2	5	14	99	136	197	108	0	0	0	0	0	0	0	0	3	22	79	18	194	94	40	273	0	0	0	0	0	40	154	59	11
Otu00572	Bacteria	Acidobacteria	Subgroup_22	Subgroup_22_or	Subgroup_22_fa	Subgroup_22_ge	3217	0	0	0	0	0	0	0	0	9	6	9	10	55	80	199	948	32	0	0	0	0	0	0	0	2	7	4	71	32	214	51	3	5	0	0	0	0	0	70	120	23	39
Otu00573	Bacteria	Acidobacteria	Subgroup_6	Subgroup_6_or	Subgroup_6_fa	Subgroup_6_ge	2120	0	50	49	30	30	21	81	100	134	104	9	8	13	9	18	2	1	0	26	29	23	25	50	32	56	26	4	13	4	4	6	0	1	0	26	20	36	8	2	2	1	0
Otu00574	Bacteria	Bacteroidetes	Bacteroidia	Cytophagales	Microscillaceae	uncultured	3817	0	0	0	1	0	0	0	0	34	26	60	105	85	223	210	250	50	0	0	0	0	0	0	1	2	28	19	215	9	260	52	10	11	0	1	1	0	6	58	157	16	45
Otu00575	Bacteria	Gemmatimonadetes	S0134_terrestrial_group	S0134_terrestrial_group_or	S0134_terrestrial_group_fa	S0134_terrestrial_group_ge	405	1	13	26	12	51	58	10	0	6	2	4	1	1	0	0	0	7	0	4	6	4	1	1	1	2	0	0	1	0	0	0	0	0	10	3	8	4	0	0	0	0	1
Otu00576	Bacteria	Actinobacteria	Acidimicrobiia	Actinomarinales	Actinomarinales_fa	Actinomarinales_ge	2336	0	2	5	5	5	9	37	68	133	47	16	15	25	83	112	52	41	0	5	0	5	17	25	10	7	24	17	122	34	167	38	2	4	0	4	0	0	1	54	105	43	10
Otu00577	Bacteria	Planctomycetes	Planctomycetacia	Planctomycetales	uncultured	uncultured_ge	1746	0	6	20	28	94	116	42	34	54	52	31	28	6	16	25	8	5	0	6	111	28	26	30	20	27	20	12	11	14	11	6	0	3	0	3	73	14	13	3	4	2	14
Otu00578	Bacteria	Chloroflexi	TK10	TK10_or	TK10_fa	TK10_ge	1195	86	113	57	41	3	15	8	11	22	2	15	4	2	0	1	2	3	81	47	7	0	7	3	1	0	2	0	1	0	0	2	0	0	38	16	3	4	1	1	0	1	0
Otu00579	Bacteria	Proteobacteria	Alphaproteobacteria	Sphingomonadales	Sphingomonadaceae	Rhizorhapis	1357	0	5	7	28	9	4	11	28	36	36	29	19	20	51	33	28	19	0	1	1	6	7	11	7	13	15	8	27	12	63	6	6	1	0	7	4	7	5	14	39	21	10
Otu00580	Bacteria	Chloroflexi	Anaerolineae	Anaerolineales	Anaerolineaceae	uncultured	1669	0	0	0	2	0	0	5	21	43	24	5	11	16	58	110	125	18	0	0	0	0	10	5	4	3	4	4	31	1	16	1	3	6	0	1	0	3	4	96	11	43	14
Otu00581	Bacteria	Acidobacteria	Acidobacteriia	Solibacterales	Solibacteraceae_(Subgroup_3)	PAUC26f	2369	0	0	1	2	7	9	25	22	72	57	39	35	38	100	98	161	59	0	0	2	5	4	7	6	10	32	44	87	30	108	30	37	21	0	3	5	3	11	40	80	29	28
Otu00582	Bacteria	Acidobacteria	Acidobacteriia	Solibacterales	Solibacteraceae_(Subgroup_3)	Bryobacter	2555	341	194	46	24	44	40	1	1	35	16	44	1	1	0	0	1	1	159	103	36	11	13	2	15	0	0	0	0	1	0	32	0	5	159	28	7	2	2	2	3	1	4
Otu00583	Bacteria	Proteobacteria	Gammaproteobacteria	Tenderiales	Tenderiaceae	Candidatus_Tenderia	2430	1	0	0	0	0	0	0	0	0	19	0	0	0	0	0	0	0	0	1	0	0	0	0	0	0	6	0	23	0	14	0	9	1872	0	0	0	0	0	13	2	40	5
Otu00584	Bacteria	Gemmatimonadetes	BD2-11_terrestrial_group	BD2-11_terrestrial_group_or	BD2-11_terrestrial_group_fa	BD2-11_terrestrial_group_ge	2224	1	11	34	16	293	176	55	38	44	56	94	70	11	25	14	49	7	0	8	123	28	12	12	20	9	66	2	10	3	26	6	0	2	0	16	29	6	4	13	10	8	9
Otu00585	Bacteria	Proteobacteria	Alphaproteobacteria	Rhizobiales	Xanthobacteraceae	Xanthobacteraceae_unclassified	3550	0	78	52	21	62	150	113	93	72	48	115	202	100	11	16	1	36	17	48	133	75	49	30	47	7	238	31	12	2	1	1	0	1	0	28	91	43	28	4	4	2	3
Otu00586	Bacteria	Bacteroidetes	Bacteroidia	Cytophagales	Cyclobacteriaceae	uncultured	319	0	0	0	0	0	0	0	0	5	6	10	20	10	10	22	20	3	0	0	0	0	0	0	0	0	14	2	12	2	14	2	2	0	0	0	0	0	0	2	18	8	4
Otu00587	Bacteria	Proteobacteria	Alphaproteobacteria	Rhodospirillales	Rhodopirillaceae	Defluviicoccus	1267	4	27	8	3	10	13	23	12	18	13	27	126	70	44	51	4	13	7	6	50	33	15	11	16	5	32	32	16	4	10	3	7	8	10	4	33	16	21	2	4	2	2
Otu00588	Bacteria	Planctomycetes	Phycisphaerae	S-70	S-70_fa	S-70_ge	3065	0	0	0	0	0	0	0	0	0	2	0	7	26	158	264	165	15	0	0	0	0	0	0	0	1	8	2	173	33	503	58	11	4	0	0	0	0	0	65	296	42	63
Otu00589	Bacteria	Proteobacteria	Alphaproteobacteria	Sphingomonadales	Sphingomonadaceae	Sphingomonadaceae_unclassified	2040	48	174	258	124	44	46	24	12	25	6	5	10	3	3	7	11	44	12	32	15	1	2	2	9	0	1	0	0	1	7	1	44	50	28	14	4	5	4	1	3	8	7
Otu00590	Bacteria	Actinobacteria	Thermoleophilia	Gaiellales	Gaiellaceae	Gaiella	2815	48	169	89	92	18	23	56	57	123	95	33	61	22	9	15	0	18	34	74	24	23	35	44	36	23	2	38	28	3	9	4	7	9	18	98	26	25	28	3	1	1	1
Otu00591	Bacteria	Chloroflexi	Anaerolineae	Anaerolineales	Anaerolineaceae	Anaerolinea	2536	68	163	49	14	23	14	0	50	62	2	11	0	7	0	2	0	4	513	110	34	3	8	2	10	0	0	0	2	1	1	10	0	0	160	36	2	0	0	1	1	2	3
Otu00592	Bacteria	Proteobacteria	Alphaproteobacteria	Rhizobiales	Methyloligellaceae	uncultured	2015	0	3	7	6	1	2	84	65	113	70	33	79	77	25	24	14	20	0	3	5	5	38	28	16	18	63	48	76	3	26	4	12	77	0	8	3	6	29	13	22	4	59
Otu00593	Bacteria	Proteobacteria	Deltaproteobacteria	NB1-j	NB1-j_fa	NB1-j_ge	1221	0	0	0	2	0	2	2	8	5	9	71	62	35	19	16	10	23	0	0	3	3	1	1	6	25	66	15	51	13	23	3	22	46	0	0	5	5	50	6	8	5	2
Otu00594	Bacteria	Bacteroidetes	Bacteroidia	Chitinophagales	Chitinophagaceae	Flavisolibacter	1573	436	57	8	4	3	32	0	0	24	5	68	2	10	0	6	3	8	65	27	3	1	1	2	7	0	0	1	0	0	0	18	0	3	164	13	1	1	0	2	1	2	4
Otu00595	Bacteria	Chloroflexi	Chloroflexi_unclassified	Chloroflexi_unclassified	Chloroflexi_unclassified	Chloroflexi_unclassified	3652	0	0	1	0	0	0	1	2	37	75	185	412	61	328	106	74	76	0	0	0	0	0	2	0	8	401	14	151	10	80	8	2	8	0	0	0	2	8	28	43	17	217
Otu00596	Bacteria	Proteobacteria	Gammaproteobacteria	Steroidobacterales	Woeseiaceae	Woeseia	194	0	0	3	5	7	2	1	1	16	12	21	10	6	2	0	2	0	0	0	1	0	0	0	1	0	10	0	3	1	1	2	0	0	0	0	0	2	0	3	1	0	2
Otu00597	Bacteria	Planctomycetes	Phycisphaerae	Tepidisphaerales	WD2101_soil_group	WD2101_soil_group_ge	4034	6	169	56	43	357	79	1	7	8	5	135	59	48	0	4	0	22	163	91	109	10	15	0	7	4	16	6	0	1	1	2	0	0	66	161	117	36	13	1	2	4	1
Otu00598	Bacteria	Firmicutes	Clostridia	Clostridiales	Gracilibacteraceae	Lutispora	1204	14	22	6	4	33	29	12	20	34	14	60	80	16	25	51	6	0	10	9	23	1	18	9	13	6	32	26	8	5	5	5	4	30	12	19	9	8	3	1	16	4	6
Otu00599	Bacteria	Omnitrophicaeota	Omnitrophicaeota_cl	Omnitrophicaeota_or	Omnitrophicaeota_fa	Omnitrophicaeota_ge	2319	0	0	0	0	0	0	0	0	9	33	20	13	25	307	157	278	32	0	0	0	0	0	1	3	1	12	9	224	20	127	16	5	4	0	0	0	0	0	27	83	18	7
Otu00600	Bacteria	Actinobacteria	Thermoleophilia	Solirubrobacterales	67-14	67-14_ge	1062	73	48	27	17	15	27	15	21	31	12	22	5	0	3	5	1	2	48	35	38	14	14	6	10	2	3	0	6	0	5	6	4	2	18	9	4	1	0	2	0	2	0
Otu00601	Bacteria	Proteobacteria	Alphaproteobacteria	Rhodospirillales	Rhodopirillaceae	Defluviicoccus	809	3	17	7	1	41	23	52	16	14	29	46	54	13	2	2	0	2	2	1	29	5	2	2	8	7	19	45	2	13	2	1	0	0	3	1	13	11	21	2	2	0	0
Otu00602	Bacteria	Chloroflexi	KD4-96	KD4-96_or	KD4-96_fa	KD4-96_ge	1390	24	10	14	4	5	14	65	53	97	76	10	2	4	1	4	1	5	8	17	15	29	98	42	39	14	1	7	7	0	3	1	0	2	15	15	11	18	6	3	0	3	17
Otu00603	Bacteria	Acidobacteria	Subgroup_5	Subgroup_5_or	Subgroup_5_fa	Subgroup_5_ge	685	13	23	11	7	3	3	24	23	33	10	15	13	5	14	14	12	4	5	11	2	0	7	9	10	4	9	5	7	3	6	5	1	0	17	14	2	9	2	2	3	3	8
Otu00604	Bacteria	Acidobacteria	Acidobacteriia	Solibacterales	Solibacteraceae_(Subgroup_3)	Bryobacter	2467	45	248	78	32	129	32	2	7	29	3	22	10	1	0	1	1	5	107	59	70	3	7	7	8	0	15	0	0	1	3	5	0	0	118	69	36	4	0	1	0	1	0
Otu00605	Bacteria	Planctomycetes	Planctomycetacia	Pirellulales	Pirellulaceae	uncultured	1262	7	36	24	17	13	7	9	24	27	16	37	54	23	0	0	1	10	14	40	14	12	28	5	15	13	46	2	0	0	2	0	0	2	38	27	16	13	7	0	2	0	0
Otu00606	Bacteria	Proteobacteria	Gammaproteobacteria	Steroidobacterales	Woeseiaceae	Woeseia	197	0	4	0	2	4	2	2	3	13	14	17	15	2	6	0	1	1	0	0	3	1	0	1	1	0	13	0	5	0	0	0	0	0	0	0	0	1	1	0	2	0	1
Otu00607	Bacteria	Planctomycetes	Planctomycetacia	Gemmatales	Gemmataceae	uncultured	1276	4	21	21	16	119	58	8	19	37	16	41	27	16	6	5	6	4	5	18	46	5	11	11	13	5	63	8	5	3	2	3	0	2	4	21	47	4	7	3	15	0	7
Otu00608	Bacteria	Actinobacteria	Actinobacteria	Micrococcales	Intrasporangiaceae	Intrasporangiaceae_unclassified	876	72	17	2	3	1	6	0	1	8	2	14	0	1	0	3	0	1	32	9	1	1	1	3	22	0	1	0	3	0	0	41	0	2	21	5	0	0	0	0	1	1	0
Otu00609	Bacteria	Firmicutes	Clostridia	Clostridiales	Lachnospiraceae	Lachnospiraceae_unclassified	386	0	3	3	1	15	8	5	1	3	7	11	9	6	8	11	3	2	5	0	0	1	4	0	1	1	15	3	3	1	15	3	2	13	3	12	7	0	3	8	13	2	13
Otu00610	Bacteria	Verrucomicrobia	Verrucomicrobiae	Opitutales	Opitutaceae	Lacunisphaera	2113	0	2	10	5	34	16	7	15	38	46	57	93	44	68	53	123	39	3	18	15	4	7	3	6	5	49	6	66	11	97	9	11	14	0	4	5	4	2	36	68	18	13
Otu00611	Bacteria	Bacteroidetes	Bacteroidia	Sphingobacteriales	NS11-12_marine_group	NS11-12_marine_group_ge	2298	0	0	0	0	0	0	1	0	2	36	86	105	117	61	115	98	19	0	0	0	0	0	0	0	12	79	33	107	10	187	46	8	8	0	0	0	0	6	88	134	30	12
Otu00612	Bacteria	Proteobacteria	Deltaproteobacteria	Desulfobacterales	Desulfobacteraceae	Desulfobacula	2833	0	0	0	0	0	0	0	1	8	0	2	2	4	2	1	17	95	0	1	0	0	0	0	0	0	3	0	7	4	22	8	541	43	0	0	0	1	0	17	32	50	7
Otu00613	Bacteria	Actinobacteria	Thermoleophilia	Solirubrobacterales	Solirubrobacterales_unclassified	Solirubrobacterales_unclassified	1972	71	199	27	10	32	48	115	16	63	36	52	48	12	15	7	1	10	90	43	79	21	26	13	13	25	49	19	26	9	5	2	3	4	14	6	10	0	1	1	0	0	1
Otu00614	Bacteria	Proteobacteria	Alphaproteobacteria	Rhizobiales	uncultured	uncultured_ge	1674	179	176	91	10	26	32	1	6	11	0	10	2	0	0	2	1	2	135	71	27	4	6	7	10	0	0	0	0	0	0	0	0	1	98	25	1	2	0	0	0	1	0
Otu00615	Bacteria	Proteobacteria	Deltaproteobacteria	Myxococcales	Archangiaceae	Anaeromyxobacter	2746	187	568	109	23	25	26	7	34	47	3	52	3	7	0	6	2	9	94	55	39	2	17	10	18	1	1	1	0	0	2	1	1	5	195	49	15	2	0	2	1	3	2
Otu00616	Bacteria	Chloroflexi	KD4-96	KD4-96_or	KD4-96_fa	KD4-96_ge	193	0	0	0	0	0	0	1	0	2	9	3	2	3	1	0	2	6	1	0	0	0	1	0	1	3	0	2	2	1	1	0	15	8	2	1	0	1	2	1	6	7	2
Otu00617	Bacteria	Firmicutes	Bacilli	Bacillales	Alicyclobacillaceae	Tumebacillus	1960	2	1	0	0	2	3	3	10	16	4	7	1429	84	5	9	1	3	0	0	1	0	2	1	0	1	4	26	3	1	7	3	0	29	0	0	1	1	0	4	2	1	1
Otu00618	Bacteria	Planctomycetes	Planctomycetacia	Gemmatales	Gemmataceae	uncultured	819	3	15	15	8	10	13	17	24	58	48	9	12	5	30	14	15	8	0	13	29	9	15	14	4	10	8	7	12	2	14	3	0	2	3	4	7	6	2	6	10	4	2
Otu00619	Bacteria	Proteobacteria	Alphaproteobacteria	Elsterales	uncultured	uncultured_ge	1040	13	55	25	10	8	13	0	19	61	29	20	6	4	18	48	59	4	11	7	2	0	0	8	6	16	6	1	8	2	9	14	3	9	13	10	4	7	4	4	6	4	5
Otu00620	Bacteria	Firmicutes	Clostridia	Clostridiales	Ruminococcaceae	Ruminococcaceae_unclassified	574	1	3	0	1	3	9	3	5	10	16	6	15	11	3	4	0	0	2	1	2	3	4	1	1	8	13	7	6	0	2	0	2	37	5	10	6	1	2	2	1	1	1
Otu00621	Bacteria	Chloroflexi	Dehalococcoidia	S085	S085_fa	S085_ge	996	12	38	19	19	7	15	14	20	22	18	30	32	10	22	28	14	6	19	10	13	4	10	6	4	1	33	2	17	6	11	3	8	14	14	10	3	12	1	2	5	6	9
Otu00622	Bacteria	Planctomycetes	Planctomycetacia	Planctomycetales	uncultured	uncultured_ge	1930	0	2	7	0	48	35	14	29	90	82	128	176	32	54	23	40	6	0	3	23	24	5	16	8	14	69	27	67	9	13	8	1	3	0	1	8	8	18	38	14	9	2
Otu00623	Bacteria	Acidobacteria	Subgroup_6	Subgroup_6_unclassified	Subgroup_6_unclassified	Subgroup_6_unclassified	246	43	13	3	4	6	4	2	2	2	1	2	14	3	0	0	0	1	8	4	4	3	3	0	1	1	7	0	0	0	0	1	0	0	10	2	5	1	0	0	0	1	0
Otu00624	Bacteria	Proteobacteria	Alphaproteobacteria	Rhizobiales	Methyloligellaceae	uncultured	2355	0	6	19	16	71	78	69	77	130	53	101	111	38	67	27	27	12	0	3	102	23	25	17	17	5	68	1	67	9	30	8	0	4	0	4	16	14	6	14	20	10	28
Otu00625	Bacteria	Proteobacteria	Gammaproteobacteria	CCD24	CCD24_fa	CCD24_ge	2443	0	3	9	1	0	8	14	26	168	193	152	74	62	268	89	129	37	0	1	1	7	3	4	3	54	21	6	17	7	24	3	3	19	0	3	4	14	11	12	9	2	64
Otu00626	Bacteria	Verrucomicrobia	Verrucomicrobiae	Opitutales	Opitutaceae	Opitutus	1154	87	116	96	51	27	24	3	2	10	1	23	5	1	3	13	6	1	77	40	19	3	5	4	2	0	0	0	0	0	4	2	0	0	48	24	7	1	0	0	1	4	1
Otu00627	Bacteria	Actinobacteria	Actinobacteria	Micromonosporales	Micromonosporaceae	Luedemannella	766	9	33	36	19	1	5	2	0	12	4	82	21	11	2	7	3	5	12	5	4	3	4	0	3	2	19	1	0	0	1	2	6	1	6	28	9	7	3	2	2	2	3
Otu00628	Bacteria	Actinobacteria	Actinobacteria	Micrococcales	Microbacteriaceae	Microbacteriaceae_unclassified	681	64	17	10	8	6	23	15	15	21	9	10	4	1	3	8	3	9	76	14	5	1	3	3	11	2	1	0	1	0	7	7	12	8	21	5	0	2	1	0	3	0	2
Otu00629	Bacteria	Bacteroidetes	Rhodothermia	Rhodothermales	Rhodothermaceae	uncultured	2501	0	0	0	0	2	4	31	20	71	221	81	99	200	46	71	63	25	0	1	0	4	0	2	2	21	103	45	80	17	30	7	0	9	0	0	6	14	32	50	20	15	4
Otu00630	Bacteria	Actinobacteria	Actinobacteria	Micromonosporales	Micromonosporaceae	Micromonosporaceae_unclassified	1046	205	40	13	2	3	30	2	2	19	10	23	6	3	2	0	0	8	45	30	5	2	16	4	4	5	2	0	0	1	0	6	0	7	50	62	2	1	0	0	0	3	0
Otu00631	Bacteria	Firmicutes	Clostridia	Clostridiales	Ruminococcaceae	Ruminococcaceae_unclassified	622	3	4	0	0	3	9	6	7	12	18	22	22	17	15	11	6	2	2	0	8	3	9	7	4	7	20	33	5	5	4	5	3	15	21	12	7	10	2	2	6	7	12
Otu00632	Bacteria	Proteobacteria	Alphaproteobacteria	Rhizobiales	Devosiaceae	Devosiaceae_unclassified	977	31	8	17	0	8	8	15	6	43	37	17	35	6	43	1	30	17	22	10	19	1	8	2	1	1	2	1	4	1	18	13	32	81	26	0	6	1	2	12	7	4	5
Otu00633	Bacteria	Gemmatimonadetes	BD2-11_terrestrial_group	BD2-11_terrestrial_group_or	BD2-11_terrestrial_group_fa	BD2-11_terrestrial_group_ge	191	0	0	2	0	4	10	2	1	6	1	1	1	3	9	3	10	0	1	0	6	2	0	1	1	1	6	0	9	0	3	0	0	1	0	2	3	0	0	4	7	3	9
Otu00634	Bacteria	Verrucomicrobia	Verrucomicrobiae	Verrucomicrobiales	Rubritaleaceae	Luteolibacter	1961	8	10	14	26	19	38	54	37	87	52	40	225	12	4	36	151	42	7	8	11	6	7	10	10	3	42	0	8	2	11	1	39	6	5	15	12	3	16	4	6	20	3
Otu00635	Bacteria	Bacteroidetes	Bacteroidia	Flavobacteriales	Flavobacteriaceae	Hoppeia	1790	0	0	0	0	0	1	1	0	9	4	64	118	75	115	112	187	38	0	0	0	0	0	1	0	4	129	0	19	4	57	4	20	2	1	0	0	0	1	16	27	13	5
Otu00636	Bacteria	Proteobacteria	Deltaproteobacteria	NB1-j	NB1-j_fa	NB1-j_ge	1744	0	0	0	0	0	0	2	2	52	124	114	62	27	28	5	2	3	0	0	0	2	0	0	0	64	26	16	42	1	35	12	11	26	0	0	2	24	55	13	6	4	16
Otu00637	Bacteria	Acidobacteria	Subgroup_6	Subgroup_6_unclassified	Subgroup_6_unclassified	Subgroup_6_unclassified	814	0	30	29	14	7	10	11	16	32	24	17	9	4	15	11	23	7	3	22	5	5	2	14	8	3	11	7	5	6	12	3	1	3	2	22	7	14	5	0	7	2	0
Otu00638	Bacteria	Bacteroidetes	Bacteroidia	Flavobacteriales	Flavobacteriaceae	Lutibacter	2400	0	0	1	0	0	1	3	3	2	5	4	0	3	10	52	46	81	1	0	0	0	0	0	1	2	0	0	7	3	13	1	291	37	0	0	4	2	0	16	55	109	109
Otu00639	Bacteria	Proteobacteria	Deltaproteobacteria	Desulfuromonadales	Geobacteraceae	Geobacter	1340	4	1	2	5	0	0	1	6	21	7	2	3	3	9	3	6	11	2	6	6	3	12	14	4	2	1	0	24	3	7	0	338	10	6	7	1	2	4	12	12	61	24
Otu00640	Bacteria	Acidobacteria	Thermoanaerobaculia	Thermoanaerobaculales	Thermoanaerobaculaceae	Subgroup_10	1799	0	1	11	9	29	44	66	22	49	84	71	237	20	49	54	36	6	0	2	37	13	16	10	13	20	27	11	10	15	29	19	0	2	0	2	7	5	2	13	8	2	2
Otu00641	Bacteria	Proteobacteria	Alphaproteobacteria	Rhizobiales	Rhizobiaceae	Mesorhizobium	2355	41	139	187	110	50	83	26	74	80	40	28	20	23	5	9	8	10	63	51	57	18	43	37	36	7	5	5	3	0	1	3	0	7	27	54	22	12	11	0	2	0	1
Otu00642	Bacteria	Acidobacteria	Acidobacteriia	Solibacterales	Solibacteraceae_(Subgroup_3)	AKIW659	856	2	6	2	0	3	2	17	17	9	4	27	54	17	4	5	1	12	2	4	10	11	12	5	6	1	48	37	2	3	4	6	14	4	17	9	9	9	19	2	2	2	3
Otu00643	Bacteria	Planctomycetes	Planctomycetacia	Pirellulales	Pirellulaceae	Pirellula	1155	0	16	23	18	6	6	34	23	36	62	119	54	22	3	10	2	8	3	10	5	15	43	17	4	3	23	2	0	1	1	0	0	0	3	17	15	18	3	1	2	0	1
Otu00644	Bacteria	Proteobacteria	Gammaproteobacteria	Betaproteobacteriales	TRA3-20	TRA3-20_ge	874	23	36	9	1	2	0	5	7	9	5	4	2	6	1	9	17	68	14	11	1	0	1	3	2	0	4	3	3	0	11	2	19	45	22	1	2	5	0	7	6	25	80
Otu00645	Bacteria	Proteobacteria	Gammaproteobacteria	Gammaproteobacteria_unclassified	Gammaproteobacteria_unclassified	Gammaproteobacteria_unclassified	1399	0	0	0	0	1	2	0	0	1	460	49	3	4	8	15	5	5	0	0	0	0	0	0	0	90	2	9	83	39	59	1	1	1	0	0	0	0	1	28	43	3	2
Otu00646	Bacteria	Proteobacteria	Alphaproteobacteria	Caulobacterales	Caulobacteraceae	Phenylobacterium	1320	105	52	36	17	1	7	0	3	18	11	17	5	19	1	6	10	4	51	24	9	0	7	5	9	2	6	0	3	4	1	20	9	97	65	12	1	4	2	2	1	3	1
Otu00647	Bacteria	Proteobacteria	Gammaproteobacteria	Salinisphaerales	Solimonadaceae	uncultured	2450	0	0	0	0	0	0	1	38	179	147	209	112	81	53	104	179	18	0	0	1	3	14	30	10	28	49	16	37	4	37	0	1	5	0	0	0	3	11	12	4	6	5
Otu00648	Bacteria	Proteobacteria	Deltaproteobacteria	Myxococcales	Sandaracinaceae	uncultured	1732	23	43	36	40	15	36	6	15	11	12	16	344	11	4	8	9	2	45	40	31	17	24	11	34	8	6	1	4	1	2	1	0	0	34	35	5	8	3	3	2	2	0
Otu00649	Bacteria	Gemmatimonadetes	BD2-11_terrestrial_group	BD2-11_terrestrial_group_or	BD2-11_terrestrial_group_fa	BD2-11_terrestrial_group_ge	1520	0	0	0	0	26	35	37	20	73	101	106	70	50	52	60	23	6	0	0	4	1	11	13	6	25	71	14	58	23	36	6	0	4	0	0	1	2	5	18	14	12	10
Otu00650	Bacteria	Planctomycetes	Planctomycetacia	Pirellulales	Pirellulaceae	Pir4_lineage	1469	0	0	4	3	26	35	57	37	83	40	40	43	32	40	56	18	6	1	1	41	15	15	25	26	10	36	29	25	12	16	11	0	1	0	2	8	2	9	19	19	2	4
Otu00651	Bacteria	Proteobacteria	Deltaproteobacteria	Myxococcales	Haliangiaceae	Haliangium	3058	0	0	0	0	0	4	27	47	140	163	203	243	240	86	83	49	56	0	1	0	2	9	10	2	30	132	22	134	16	104	12	7	13	0	0	0	9	28	50	34	6	9
Otu00652	Bacteria	Chloroflexi	Anaerolineae	Ardenticatenales	uncultured	uncultured_ge	3003	0	0	0	0	0	0	0	0	3	6	16	9	18	516	145	689	16	0	0	0	0	0	0	0	2	12	4	66	33	134	19	2	6	0	0	0	0	1	67	268	7	399
Otu00653	Bacteria	Acidobacteria	Thermoanaerobaculia	Thermoanaerobaculales	Thermoanaerobaculaceae	Subgroup_10	1294	0	15	23	27	4	8	36	33	49	26	24	19	10	29	57	9	4	0	7	13	5	2	5	3	1	4	7	13	8	73	22	1	1	0	4	10	10	3	27	98	22	2
Otu00654	Bacteria	Entotheonellaeota	Entotheonellia	Entotheonellales	Entotheonellaceae	Entotheonellaceae_ge	2218	0	3	46	27	5	10	280	105	169	101	91	43	27	1	5	0	12	0	9	7	43	42	47	43	33	37	31	2	0	0	1	0	4	0	26	4	58	45	1	1	2	1
Otu00655	Bacteria	Proteobacteria	Deltaproteobacteria	Desulfobacterales	Desulfobacteraceae	Desulfobacteraceae_unclassified	1068	0	1	0	1	0	0	0	0	0	3	1	2	0	12	1	47	2	0	0	0	0	0	0	0	1	4	0	9	0	22	6	74	268	0	0	0	0	0	2	17	93	4
Otu00656	Bacteria	Proteobacteria	Alphaproteobacteria	Rhizobiales	Xanthobacteraceae	Pseudolabrys	878	3	14	2	2	0	1	1	0	15	4	5	7	3	15	13	37	30	12	1	0	0	3	0	0	1	6	1	5	0	18	4	21	62	0	4	0	0	1	5	33	57	10
Otu00657	Bacteria	Actinobacteria	Actinobacteria	Micrococcales	Cellulomonadaceae	Actinotalea	759	51	16	11	2	2	12	26	18	15	3	12	1	0	1	2	1	18	19	9	3	0	13	4	9	0	0	0	1	1	1	18	55	5	12	5	2	0	0	1	2	5	1
Otu00658	Bacteria	Planctomycetes	Phycisphaerae	S-70	S-70_fa	S-70_ge	3579	0	0	0	0	0	0	0	0	7	21	104	26	40	231	328	373	14	0	0	0	0	0	1	0	16	26	18	139	64	180	12	2	6	0	0	0	0	2	65	84	7	21
Otu00659	Bacteria	Gemmatimonadetes	Longimicrobia	Longimicrobiales	Longimicrobiaceae	Longimicrobiaceae_ge	923	19	41	33	9	15	14	46	10	41	37	26	1	5	15	10	6	11	7	5	4	3	0	0	2	4	22	3	14	2	17	4	0	1	30	7	2	6	2	2	3	6	85
Otu00660	Bacteria	Actinobacteria	Thermoleophilia	uncultured	uncultured_fa	uncultured_ge	432	0	0	0	0	0	0	22	38	42	24	1	0	1	15	5	0	4	0	0	0	0	52	15	11	1	0	5	12	5	2	0	0	1	0	1	1	2	2	1	3	1	0
Otu00661	Bacteria	Nitrospirae	Nitrospira	Nitrospirales	Nitrospiraceae	Nitrospira	3000	0	0	0	0	0	0	0	1	77	19	118	211	86	221	202	145	68	0	0	0	0	0	1	1	3	96	42	57	42	102	54	4	2	0	0	0	0	8	35	51	7	27
Otu00662	Bacteria	Chloroflexi	Anaerolineae	Ardenticatenales	uncultured	uncultured_ge	997	0	13	16	8	10	15	79	14	49	10	5	9	3	3	10	1	0	7	23	10	12	35	14	18	4	2	2	13	2	19	1	0	1	0	3	7	3	0	32	87	0	2
Otu00663	Bacteria	Proteobacteria	Gammaproteobacteria	Acidiferrobacterales	Acidiferrobacteraceae	Sulfurifustis	2320	0	0	0	0	0	0	0	0	4	12	0	4	1	2	2	167	368	0	0	0	0	0	0	0	0	3	1	8	0	16	4	138	839	0	0	0	0	0	7	9	20	71
Otu00664	Bacteria	Chloroflexi	Anaerolineae	Anaerolineae_unclassified	Anaerolineae_unclassified	Anaerolineae_unclassified	1940	0	0	0	0	0	0	0	4	8	13	1	2	4	24	41	27	27	0	0	0	0	1	0	1	2	4	1	38	1	89	7	121	241	0	0	0	1	1	10	14	66	66
Otu00665	Bacteria	Hydrogenedentes	Hydrogenedentia	Hydrogenedentiales	Hydrogenedensaceae	Hydrogenedensaceae_ge	1286	0	1	4	5	12	7	5	22	13	5	25	26	18	19	5	9	39	0	1	9	4	5	3	4	5	13	1	5	2	31	6	227	39	0	1	3	3	9	12	11	97	15
Otu00666	Bacteria	Gemmatimonadetes	Gemmatimonadetes	Gemmatimonadales	Gemmatimonadaceae	uncultured	2094	238	249	104	26	68	25	5	9	24	3	40	3	7	0	2	0	4	146	40	52	6	7	3	11	3	0	0	0	0	1	1	0	1	146	31	4	1	5	2	2	3	5
Otu00667	Bacteria	Proteobacteria	Alphaproteobacteria	Rhizobiales	Beijerinckiaceae	Microvirga	1041	155	45	8	0	2	16	2	1	63	5	28	0	1	0	1	1	7	98	32	7	3	7	1	11	1	0	0	1	0	0	6	3	3	62	9	0	1	1	3	2	1	1
Otu00668	Bacteria	Firmicutes	Bacilli	Bacillales	Bacillaceae	Bacillus	1162	31	17	11	2	41	40	17	16	52	22	27	28	24	35	18	5	8	11	7	5	3	20	5	8	6	5	4	1	3	2	3	1	19	30	7	13	7	10	3	3	4	2
Otu00669	Bacteria	Nitrospirae	Thermodesulfovibrionia	uncultured	uncultured_fa	uncultured_ge	2653	0	0	0	0	0	0	0	0	0	2	0	0	0	0	1	6	5	0	0	0	0	0	0	0	0	1	0	1	0	3	4	0	4	0	0	0	0	0	0	0	26	2395
Otu00670	Bacteria	Proteobacteria	Alphaproteobacteria	Rhizobiales	Rhizobiaceae	Mesorhizobium	2312	157	233	243	43	63	127	11	33	30	7	10	1	3	0	2	1	3	128	90	73	9	13	17	28	4	2	1	3	0	1	6	0	4	43	52	18	5	1	0	0	0	0
Otu00671	Bacteria	Proteobacteria	Gammaproteobacteria	Betaproteobacteriales	Burkholderiaceae	Lautropia	2140	314	232	154	26	12	44	0	0	18	14	64	3	6	0	3	5	7	153	73	8	4	8	5	13	0	0	0	1	2	0	4	0	4	129	28	2	2	0	2	4	5	3
Otu00672	Bacteria	Gemmatimonadetes	Gemmatimonadetes	Gemmatimonadales	Gemmatimonadaceae	uncultured	2135	0	15	13	2	2	4	4	5	53	49	154	262	74	63	43	58	16	1	5	3	1	4	1	5	15	201	4	29	8	55	13	36	18	5	4	2	1	3	12	29	8	7
Otu00673	Bacteria	Gemmatimonadetes	Gemmatimonadetes	Gemmatimonadales	Gemmatimonadaceae	uncultured	1018	0	3	7	6	0	0	7	29	26	13	14	29	18	1	3	1	10	0	4	2	1	27	28	14	4	13	4	9	2	9	1	22	21	2	19	3	26	35	3	3	4	26
Otu00674	Bacteria	Proteobacteria	Gammaproteobacteria	Gammaproteobacteria_unclassified	Gammaproteobacteria_unclassified	Gammaproteobacteria_unclassified	1749	1	31	7	10	11	4	83	74	202	2	2	11	3	0	1	0	2	25	70	39	42	37	29	23	2	1	1	0	1	0	2	0	3	180	44	8	2	7	19	1	5	3
Otu00675	Archaea	Thaumarchaeota	Nitrososphaeria	Nitrosopumilales	Nitrosopumilaceae	Nitrosopumilaceae_ge	2664	0	0	0	0	0	0	0	0	7	5	0	1	15	111	372	880	22	0	0	0	0	0	0	0	0	1	6	130	52	19	8	4	3	0	1	1	0	0	35	20	9	150
Otu00676	Bacteria	Proteobacteria	Alphaproteobacteria	Rhodobacterales	Rhodobacteraceae	Rhodobacteraceae_unclassified	2502	0	0	1	0	1	0	0	1	3	0	12	5	13	30	158	269	13	0	0	0	0	0	0	0	0	4	0	24	1	163	1	2	4	0	0	0	0	1	15	48	17	26
Otu00677	Bacteria	Firmicutes	Bacilli	Bacillales	Planococcaceae	Lysinibacillus	1079	12	11	10	3	219	104	8	13	31	6	5	6	10	5	8	1	3	9	7	21	3	5	0	5	14	0	5	5	5	1	0	2	16	1	26	41	0	0	1	1	0	0
Otu00678	Bacteria	Planctomycetes	Planctomycetacia	Pirellulales	Pirellulaceae	Pir4_lineage	1619	0	8	0	2	11	27	58	43	54	98	29	10	15	244	40	40	8	0	0	26	14	4	4	24	3	14	24	27	11	69	19	1	21	0	1	36	8	7	20	91	4	58
Otu00679	Bacteria	Planctomycetes	Phycisphaerae	Phycisphaerales	Phycisphaeraceae	Urania-1B-19_marine_sediment_group	1709	1	1	9	4	24	41	212	60	94	104	15	8	18	5	1	0	8	1	4	36	19	16	18	24	47	5	32	21	2	0	1	2	0	0	5	9	39	55	0	1	0	0
Otu00680	Bacteria	Chloroflexi	Dehalococcoidia	SAR202_clade	SAR202_clade_fa	SAR202_clade_ge	1804	0	3	1	2	2	4	10	13	33	50	44	64	32	51	41	96	47	0	2	7	6	5	6	2	16	34	10	68	7	71	8	62	66	0	9	2	5	16	42	50	22	12
Otu00681	Bacteria	Proteobacteria	Deltaproteobacteria	Desulfobacterales	Desulfobulbaceae	Desulfurivibrio	2476	0	0	0	0	0	0	0	0	1	0	0	3	5	9	1	17	53	0	0	0	0	0	0	0	0	2	0	1	0	13	10	56	31	0	0	0	0	0	3	6	383	7
Otu00682	Bacteria	Proteobacteria	Alphaproteobacteria	Rhizobiales	Xanthobacteraceae	uncultured	1529	126	132	32	19	7	30	3	5	18	29	21	6	4	3	4	5	22	57	51	4	0	7	7	6	22	13	2	5	3	3	2	22	29	71	11	5	11	4	6	4	5	10
Otu00683	Bacteria	Bacteroidetes	Ignavibacteria	Ignavibacteriales	Ignavibacteriales_unclassified	Ignavibacteriales_unclassified	1071	22	46	20	4	18	9	3	15	21	8	4	4	1	3	0	1	10	31	33	15	1	10	6	8	1	4	0	3	0	5	8	5	64	61	30	7	6	0	2	2	21	16
Otu00684	Bacteria	Actinobacteria	Thermoleophilia	Gaiellales	uncultured	uncultured_ge	1163	0	1	6	2	0	1	17	111	187	34	4	5	2	22	18	2	2	0	5	1	1	68	79	29	3	0	4	20	10	3	0	6	12	0	3	3	5	2	0	1	8	3
Otu00685	Bacteria	Proteobacteria	Alphaproteobacteria	Rhizobiales	Rhizobiales_unclassified	Rhizobiales_unclassified	1946	0	0	0	0	0	0	6	15	31	22	19	14	23	136	165	134	35	0	0	3	0	0	5	0	2	15	6	154	97	190	38	10	13	0	0	0	0	0	12	18	54	5
Otu00686	Bacteria	Proteobacteria	Alphaproteobacteria	Rhizobiales	uncultured	uncultured_ge	1060	154	40	9	5	8	15	1	3	22	8	11	3	1	1	0	2	4	86	22	3	5	5	1	5	0	2	1	0	1	0	1	0	4	122	17	1	4	0	0	1	1	1
Otu00687	Bacteria	Proteobacteria	Gammaproteobacteria	Betaproteobacteriales	TRA3-20	TRA3-20_ge	161	0	0	0	2	0	0	1	3	23	25	7	6	2	2	2	7	7	0	0	0	0	0	0	0	3	0	2	5	0	4	0	0	3	0	0	0	1	0	1	0	0	1
Otu00688	Bacteria	Acidobacteria	Thermoanaerobaculia	Thermoanaerobaculales	Thermoanaerobaculaceae	Subgroup_10	1981	4	73	53	47	17	19	56	39	61	51	5	6	11	42	66	36	7	6	47	6	13	9	11	14	11	1	12	20	20	52	68	6	0	4	32	4	8	28	4	13	3	2
Otu00689	Bacteria	Bacteroidetes	Bacteroidia	Chitinophagales	Chitinophagaceae	Flavisolibacter	713	117	57	4	6	2	14	0	1	14	1	44	0	9	0	6	1	4	29	14	4	4	0	0	1	0	0	0	0	0	0	19	0	1	31	7	1	0	0	1	1	2	5
Otu00690	Bacteria	Proteobacteria	Gammaproteobacteria	Gammaproteobacteria_unclassified	Gammaproteobacteria_unclassified	Gammaproteobacteria_unclassified	171	0	2	2	1	6	7	3	2	14	12	9	10	1	5	2	2	2	0	0	2	0	0	0	1	0	15	0	0	0	3	0	0	0	0	0	1	1	0	2	4	1	0
Otu00691	Bacteria	Actinobacteria	Acidimicrobiia	IMCC26256	IMCC26256_fa	IMCC26256_ge	1170	1	54	38	15	36	17	14	24	19	30	18	20	16	30	22	28	7	4	28	23	7	5	3	11	7	7	9	33	11	29	11	1	11	3	10	3	9	5	9	7	7	13
Otu00692	Bacteria	Actinobacteria	Actinobacteria	Propionibacteriales	Nocardioidaceae	Aeromicrobium	1760	305	251	101	7	1	20	2	22	15	6	16	6	5	5	7	8	5	115	67	12	4	29	9	14	1	1	0	3	3	1	1	0	2	47	18	2	0	0	0	1	0	1
Otu00693	Bacteria	Proteobacteria	Alphaproteobacteria	Thalassobaculales	Thalassobaculaceae	Thalassobaculum	705	0	10	3	3	4	15	11	10	21	22	6	6	7	20	21	31	9	4	2	7	0	0	0	5	3	2	0	7	5	26	9	7	15	1	1	1	1	1	10	15	7	11
Otu00694	Bacteria	Proteobacteria	Gammaproteobacteria	Thiotrichales	Thiotrichaceae	uncultured	3751	0	0	0	0	0	0	1	0	6	0	16	9	77	6	409	87	213	0	0	0	0	0	0	0	1	20	2	27	1	204	13	5	6	0	0	0	0	0	200	351	83	47
Otu00695	Bacteria	Proteobacteria	Gammaproteobacteria	Xanthomonadales	Xanthomonadaceae	Lysobacter	2462	0	2	12	46	95	100	70	51	67	80	108	142	50	20	35	17	6	0	4	112	29	26	31	22	26	62	0	7	2	4	1	0	3	0	17	19	24	49	2	1	1	4
Otu00696	Bacteria	Chloroflexi	Anaerolineae	Anaerolineales	Anaerolineaceae	uncultured	2049	0	0	0	1	0	1	12	23	138	291	103	84	87	99	77	11	10	0	0	0	2	71	48	15	29	10	56	61	17	50	25	6	4	0	0	0	28	16	8	10	12	3
Otu00697	Bacteria	Proteobacteria	Alphaproteobacteria	Caulobacterales	Caulobacteraceae	Caulobacteraceae_unclassified	1264	76	136	133	62	63	34	12	23	19	10	34	4	5	0	7	2	3	29	15	17	3	3	1	7	0	3	0	4	1	4	1	1	1	31	6	2	0	0	0	8	0	1
Otu00698	Bacteria	Planctomycetes	Planctomycetacia	Pirellulales	Pirellulaceae	Rhodopirellula	1065	1	13	13	6	39	15	25	43	54	36	8	5	5	2	2	1	4	5	19	18	17	51	21	17	6	9	13	0	0	1	2	1	1	3	19	21	18	17	1	1	1	2
Otu00699	Bacteria	Proteobacteria	Deltaproteobacteria	Desulfarculales	Desulfarculaceae	uncultured	528	0	3	0	0	0	1	0	3	23	12	19	4	14	6	16	14	8	1	2	0	0	0	6	1	5	6	3	10	6	12	2	10	7	0	1	0	3	5	6	4	32	41
Otu00700	Bacteria	Proteobacteria	Deltaproteobacteria	Myxococcales	Archangiaceae	Anaeromyxobacter	247	0	6	6	1	0	0	0	1	2	1	4	7	8	2	4	1	3	1	0	1	3	0	1	2	1	22	1	5	0	6	0	9	5	8	9	0	0	2	1	0	2	1
Otu00701	Bacteria	Proteobacteria	Deltaproteobacteria	Desulfobacterales	Desulfobulbaceae	uncultured	3129	0	1	0	0	0	1	4	6	47	9	87	46	37	60	157	309	14	0	0	0	0	0	0	1	20	51	25	382	109	244	13	13	8	0	0	0	3	9	92	49	62	6
Otu00702	Bacteria	Firmicutes	Bacilli	Bacillales	Planococcaceae	Planococcaceae_unclassified	2108	4	0	9	3	17	14	1	6	36	8	3	7	11	3	4	1	4	61	23	1	1	1	5	20	3	0	6	3	3	4	107	1	11	8	3	6	3	0	0	1	2	2
Otu00703	Bacteria	Verrucomicrobia	Verrucomicrobiae	Pedosphaerales	Pedosphaeraceae	Pedosphaeraceae_ge	1209	25	54	34	7	3	4	2	15	50	50	15	1	10	27	4	22	9	36	51	6	6	9	7	11	3	8	2	43	2	1	0	0	2	38	14	3	5	2	5	0	0	1
Otu00704	Bacteria	Actinobacteria	MB-A2-108	MB-A2-108_or	MB-A2-108_fa	MB-A2-108_ge	844	14	44	9	3	3	5	26	15	22	22	11	15	12	16	16	1	4	18	15	3	12	9	6	8	3	9	2	9	0	4	2	1	1	26	21	10	2	6	4	2	0	2
Otu00705	Bacteria	Proteobacteria	Alphaproteobacteria	uncultured	uncultured_fa	uncultured_ge	1847	0	0	1	1	4	5	1	0	21	34	40	30	54	170	196	141	15	0	0	1	1	0	1	0	2	51	10	87	33	116	21	5	7	0	1	1	0	0	21	25	6	9
Otu00706	Bacteria	Gemmatimonadetes	Gemmatimonadetes	Gemmatimonadales	Gemmatimonadaceae	uncultured	1644	0	1	0	0	0	0	2	4	32	74	20	13	41	149	108	200	22	1	0	0	0	0	0	3	15	4	12	113	19	69	25	5	9	0	6	0	2	5	23	40	7	20
Otu00707	Bacteria	Proteobacteria	Alphaproteobacteria	Rhizobiales	Devosiaceae	Devosia	695	59	30	34	15	19	30	12	8	15	8	14	3	0	0	19	11	17	6	10	2	4	5	5	3	0	0	1	0	1	7	5	4	9	7	9	1	0	4	1	1	2	0
Otu00708	Bacteria	Firmicutes	Bacilli	Bacillales	Paenibacillaceae	Paenibacillus	1126	0	0	0	0	4	4	13	30	57	25	41	17	22	18	40	7	12	0	2	1	6	46	30	20	33	14	35	132	22	15	3	9	19	1	2	8	1	5	11	2	9	3
Otu00709	Bacteria	Acidobacteria	Acidobacteriia	Solibacterales	Solibacteraceae_(Subgroup_3)	Bryobacter	1711	113	103	170	75	2	14	1	5	10	0	13	0	1	0	0	0	0	101	71	6	3	7	7	12	1	0	0	0	1	0	6	1	0	169	24	2	3	0	1	1	1	1
Otu00710	Bacteria	Proteobacteria	Alphaproteobacteria	Rhodovibrionales	Kiloniellaceae	Pelagibius	157	0	0	3	0	5	8	9	7	7	1	3	3	1	1	0	0	0	0	1	4	1	1	0	4	1	3	0	0	0	9	0	0	1	0	0	3	1	0	0	2	0	2
Otu00711	Bacteria	Verrucomicrobia	Verrucomicrobiae	Pedosphaerales	Pedosphaeraceae	Pedosphaeraceae_ge	1089	94	123	37	13	1	14	0	0	15	3	25	2	3	0	1	0	2	74	32	10	2	3	1	3	0	1	0	0	1	0	0	0	1	121	15	1	1	0	0	0	5	3
Otu00712	Bacteria	Proteobacteria	Deltaproteobacteria	Deltaproteobacteria_unclassified	Deltaproteobacteria_unclassified	Deltaproteobacteria_unclassified	2152	0	0	0	0	0	0	0	0	1	1	0	0	0	0	0	1	2	0	0	0	0	0	0	0	0	8	0	75	0	152	0	42	454	0	0	0	0	0	12	11	2	7
Otu00713	Bacteria	Planctomycetes	Planctomycetacia	Pirellulales	Pirellulaceae	uncultured	1869	24	22	19	20	6	7	78	76	106	59	28	7	9	34	12	8	7	8	21	10	8	36	33	30	44	33	138	61	7	11	11	4	7	17	28	6	36	24	6	6	15	1
Otu00714	Bacteria	Chloroflexi	Anaerolineae	Anaerolineales	Anaerolineaceae	uncultured	1684	0	0	0	0	0	1	0	0	2	4	1	2	2	3	6	8	20	0	0	0	0	0	0	0	0	7	5	53	4	25	1	432	109	0	0	0	0	2	12	10	127	227
Otu00715	Bacteria	Proteobacteria	Alphaproteobacteria	Rhizobiales	Rhizobiales_Incertae_Sedis	Bauldia	2740	0	3	6	3	21	26	113	47	160	158	121	35	33	101	105	137	32	1	1	16	30	24	38	21	18	9	0	30	9	75	6	2	13	1	3	12	24	11	13	69	25	160
Otu00716	Bacteria	Bacteroidetes	Bacteroidia	Bacteroidales	Prolixibacteraceae	Prolixibacteraceae_unclassified	1063	0	0	0	0	0	0	0	2	0	0	0	0	0	0	2	27	13	0	0	0	0	0	0	0	0	0	0	0	0	1	0	89	51	0	0	0	0	0	1	10	10	0
Otu00717	Bacteria	Proteobacteria	Gammaproteobacteria	Alteromonadales	Psychromonadaceae	Psychromonas	2692	0	0	0	0	0	0	1	0	9	16	15	46	12	30	55	297	19	1	0	0	0	0	0	0	1	3	0	29	8	235	6	31	14	0	0	0	0	2	32	153	202	61
Otu00718	Bacteria	Proteobacteria	Deltaproteobacteria	Desulfobacterales	Desulfobulbaceae	Desulfurivibrio	2783	0	0	0	0	1	1	0	2	5	7	48	21	23	37	28	27	52	0	0	0	0	1	0	3	17	93	15	171	56	277	8	14	6	0	0	0	1	7	273	56	48	10
Otu00719	Bacteria	Chloroflexi	Anaerolineae	Caldilineales	Caldilineaceae	uncultured	1156	80	77	21	8	3	9	11	9	25	21	18	12	13	16	15	1	4	113	25	7	0	9	14	8	5	11	4	10	3	14	3	1	1	36	1	2	1	7	4	7	3	10
Otu00720	Bacteria	Bacteroidetes	Bacteroidia	Cytophagales	Microscillaceae	uncultured	1663	0	0	2	0	13	0	7	19	92	57	86	383	31	82	19	70	17	0	0	4	2	6	6	5	1	18	0	26	5	70	8	5	4	0	0	0	0	11	22	44	53	59
Otu00721	Bacteria	Proteobacteria	Gammaproteobacteria	Oceanospirillales	Nitrincolaceae	Marinobacterium	161	0	0	0	0	0	0	0	0	3	2	12	18	9	4	12	4	1	0	0	0	0	0	0	0	0	2	0	7	0	10	0	0	0	0	0	0	0	1	4	6	1	0
Otu00722	Bacteria	Gemmatimonadetes	S0134_terrestrial_group	S0134_terrestrial_group_or	S0134_terrestrial_group_fa	S0134_terrestrial_group_ge	1794	10	113	255	382	98	38	34	11	18	23	1	1	8	1	5	1	13	13	10	10	2	1	1	2	2	31	0	0	0	0	1	0	2	57	5	1	8	14	0	1	0	1
Otu00723	Bacteria	Firmicutes	Clostridia	Clostridiales	Clostridiaceae_1	Clostridium_sensu_stricto_1	1465	17	38	14	9	6	7	3	38	85	31	16	18	19	17	21	13	4	14	7	11	3	34	16	15	18	12	10	10	11	9	3	11	39	32	18	11	3	9	24	134	47	15
Otu00724	Bacteria	Acidobacteria	Acidobacteriia	Solibacterales	Solibacteraceae_(Subgroup_3)	PAUC26f	1290	0	2	4	3	4	0	1	11	39	67	62	143	43	21	8	8	4	0	0	3	2	3	13	2	15	55	19	24	11	17	7	5	4	0	2	2	22	44	9	14	5	10
Otu00725	Bacteria	Chloroflexi	Anaerolineae	Caldilineales	Caldilineaceae	uncultured	730	0	6	12	10	2	2	47	18	35	29	18	20	14	8	11	3	0	1	9	1	14	15	11	8	6	12	2	4	1	1	0	0	0	0	2	2	12	6	7	0	1	6
Otu00726	Bacteria	Bacteroidetes	Bacteroidia	Chitinophagales	Chitinophagaceae	Ferruginibacter	598	149	24	14	2	2	16	0	0	9	1	19	2	4	0	1	4	4	25	14	5	2	1	2	0	0	1	0	0	0	0	1	0	3	57	3	0	1	0	0	0	1	0
Otu00727	Bacteria	Proteobacteria	Deltaproteobacteria	Myxococcales	Archangiaceae	Anaeromyxobacter	350	7	31	20	4	1	0	4	2	6	11	4	5	5	6	3	0	3	2	3	6	4	1	0	1	9	2	5	6	0	3	2	3	4	1	1	0	0	2	0	0	2	1
Otu00728	Bacteria	Proteobacteria	Gammaproteobacteria	Gammaproteobacteria_unclassified	Gammaproteobacteria_unclassified	Gammaproteobacteria_unclassified	2327	0	0	0	0	0	1	1	1	50	10	7	2	10	5	1	3	98	0	0	0	0	0	0	0	0	3	0	2	0	23	1	8	168	0	0	0	0	0	6	7	47	15
Otu00729	Bacteria	Firmicutes	Clostridia	Clostridiales	Lachnospiraceae	Lachnospiraceae_unclassified	1051	0	0	1	0	1	16	10	4	6	8	7	5	3	2	22	18	4	2	2	1	2	1	6	0	1	3	4	1	3	66	14	7	21	2	10	2	0	1	86	231	16	19
Otu00730	Bacteria	Acidobacteria	Subgroup_6	Subgroup_6_or	Subgroup_6_fa	Subgroup_6_ge	172	0	0	0	0	0	0	0	0	3	1	3	8	3	11	9	11	5	0	0	0	0	0	0	0	0	6	1	7	2	15	2	0	0	0	0	0	0	0	2	7	1	1
Otu00731	Bacteria	Proteobacteria	Alphaproteobacteria	Caulobacterales	Hyphomonadaceae	Hirschia	1109	27	36	15	5	17	18	20	30	61	81	31	65	15	26	5	27	4	28	11	20	12	8	9	8	7	6	1	16	2	11	1	0	1	36	5	4	8	2	10	8	2	11
Otu00732	Bacteria	Proteobacteria	Gammaproteobacteria	Gammaproteobacteria_Incertae_Sedis	Unknown_Family	uncultured	1195	1	0	0	0	0	0	0	0	7	18	3	1	3	30	20	34	29	0	0	0	0	0	1	0	0	0	0	28	14	70	10	35	22	0	0	0	0	0	16	111	99	6
Otu00733	Bacteria	Proteobacteria	Alphaproteobacteria	Rhizobiales	Rhizobiaceae	Rhizobiaceae_unclassified	1007	30	5	5	5	2	27	6	7	38	4	8	5	2	1	8	13	13	28	10	5	0	5	4	0	0	0	1	3	0	0	21	9	13	10	28	3	6	0	2	3	8	4
Otu00734	Bacteria	Acidobacteria	Acidobacteriia	Solibacterales	Solibacteraceae_(Subgroup_3)	PAUC26f	1702	0	0	0	0	0	0	0	7	130	68	20	31	43	62	72	93	18	0	0	0	0	0	12	6	10	20	96	98	11	52	12	3	8	0	0	0	1	9	22	34	30	9
Otu00735	Bacteria	Planctomycetes	Planctomycetacia	Pirellulales	Pirellulaceae	Blastopirellula	2327	0	31	35	45	361	197	37	43	49	37	65	28	20	4	2	2	8	11	22	74	11	26	14	20	10	15	7	2	2	2	1	0	1	2	31	87	15	6	4	6	0	3
Otu00736	Bacteria	Gemmatimonadetes	Longimicrobia	Longimicrobiales	Longimicrobiaceae	Longimicrobiaceae_ge	1089	57	122	107	73	11	15	44	15	38	16	13	2	4	6	14	10	6	15	16	5	6	5	8	5	2	1	0	9	2	4	2	0	1	58	16	4	2	1	1	4	3	2
Otu00737	Bacteria	Actinobacteria	Thermoleophilia	Gaiellales	uncultured	uncultured_ge	636	0	1	0	0	0	1	2	0	1	4	0	1	1	8	6	2	6	0	0	0	1	0	1	1	0	5	1	19	0	27	0	26	170	0	0	0	1	0	2	1	8	48
Otu00738	Bacteria	Proteobacteria	Alphaproteobacteria	Rhodospirillales	Rhodospirillaceae	uncultured	547	9	12	21	9	7	4	4	6	16	7	8	6	2	13	11	20	7	10	7	8	5	3	3	4	0	0	1	7	3	7	1	5	15	2	4	1	1	1	4	8	3	8
Otu00739	Bacteria	Bacteria_unclassified	Bacteria_unclassified	Bacteria_unclassified	Bacteria_unclassified	Bacteria_unclassified	2688	0	0	0	0	0	2	2	6	45	35	168	227	71	146	55	55	8	0	0	0	0	10	6	0	7	143	5	94	2	7	0	0	3	0	0	0	2	30	7	7	26	10
Otu00740	Bacteria	Proteobacteria	Alphaproteobacteria	Thalassobaculales	uncultured	uncultured_ge	2066	0	3	2	0	2	0	0	4	3	3	7	5	7	46	4	14	36	0	0	0	0	0	0	0	0	5	0	20	10	34	11	235	157	1	3	0	1	1	19	51	81	53
Otu00741	Bacteria	Proteobacteria	Alphaproteobacteria	uncultured	uncultured_fa	uncultured_ge	4355	0	0	14	9	0	1	4	3	42	168	104	25	47	124	77	21	68	0	0	1	1	2	1	2	40	8	25	202	44	290	69	386	102	0	10	11	12	21	78	153	68	17
Otu00742	Bacteria	Proteobacteria	Deltaproteobacteria	Myxococcales	BIrii41	BIrii41_ge	1174	147	51	68	17	24	21	6	1	6	4	24	6	5	10	2	8	2	42	56	33	6	3	3	11	0	1	0	1	4	1	1	1	0	50	15	5	2	1	3	2	1	22
Otu00743	Bacteria	Actinobacteria	Thermoleophilia	Gaiellales	uncultured	uncultured_ge	2241	0	0	7	19	0	1	88	248	276	97	14	14	14	33	46	3	13	1	3	0	1	101	122	42	21	1	19	94	45	26	0	0	1	0	14	1	17	13	10	4	4	4
Otu00744	Bacteria	Gemmatimonadetes	Gemmatimonadetes	Gemmatimonadales	Gemmatimonadaceae	uncultured	1897	0	0	0	0	0	0	9	0	36	106	97	21	31	23	15	6	9	0	0	1	0	0	4	0	31	32	3	25	12	21	2	36	34	0	0	0	40	10	9	16	57	69
Otu00745	Bacteria	Planctomycetes	Planctomycetacia	Pirellulales	Pirellulaceae	Pir4_lineage	2041	0	0	0	0	0	0	1	3	3	8	26	3	30	84	2	26	1	0	0	0	0	0	0	0	3	0	3	16	2	7	0	1	3	0	0	0	0	0	7	118	17	1247
Otu00746	Bacteria	Actinobacteria	Actinobacteria	Propionibacteriales	Nocardioidaceae	Nocardioides	1382	110	26	5	7	2	11	0	1	7	5	19	0	0	0	2	0	3	82	16	4	2	4	1	22	1	0	0	0	0	1	72	0	3	22	12	1	0	0	0	0	0	0
Otu00747	Bacteria	Verrucomicrobia	Verrucomicrobiae	Pedosphaerales	Pedosphaeraceae	Pedosphaeraceae_ge	2025	0	0	13	17	77	27	42	38	91	113	88	134	81	47	41	13	13	0	0	24	6	6	5	6	8	76	5	65	3	9	2	1	4	0	0	0	5	24	27	11	5	12
Otu00748	Bacteria	Actinobacteria	0319-7L14	0319-7L14_or	0319-7L14_fa	0319-7L14_ge	1233	0	5	40	69	17	6	34	107	129	91	10	5	5	33	4	3	1	0	16	8	5	48	31	25	5	0	3	11	6	3	0	0	0	1	19	1	13	9	1	1	0	0
Otu00749	Bacteria	Proteobacteria	Alphaproteobacteria	Rhodovibrionales	Fodinicurvataceae	uncultured	1819	0	5	19	27	43	39	19	74	55	68	112	67	33	56	44	29	9	0	1	15	13	21	15	11	14	40	5	32	9	8	2	0	2	0	4	38	15	10	40	8	2	31
Otu00750	Bacteria	Proteobacteria	Gammaproteobacteria	Betaproteobacteriales	TRA3-20	TRA3-20_ge	148	0	0	0	0	0	0	0	0	2	3	0	0	6	15	10	2	0	0	0	0	0	0	0	0	0	1	0	5	0	1	0	0	2	0	0	0	0	0	0	1	0	10
Otu00751	Bacteria	Firmicutes	Clostridia	Clostridiales	Clostridiaceae_1	Clostridium_sensu_stricto_8	491	5	4	3	1	5	7	7	15	17	8	32	20	10	4	2	4	4	6	0	4	4	13	1	3	9	13	8	1	5	8	0	1	13	2	6	5	6	2	1	4	1	0
Otu00752	Bacteria	Bacteria_unclassified	Bacteria_unclassified	Bacteria_unclassified	Bacteria_unclassified	Bacteria_unclassified	1104	0	0	0	0	0	0	0	0	1	5	0	0	1	0	0	13	3	0	0	0	0	0	0	0	0	4	0	23	0	57	4	43	369	0	0	0	0	0	11	13	9	4
Otu00753	Bacteria	Bacteria_unclassified	Bacteria_unclassified	Bacteria_unclassified	Bacteria_unclassified	Bacteria_unclassified	157	0	0	0	0	0	0	0	0	1	3	2	4	0	9	8	15	0	0	0	0	0	0	0	0	1	0	0	6	0	7	1	0	2	0	0	0	0	0	6	7	0	13
Otu00754	Bacteria	Proteobacteria	Alphaproteobacteria	Alphaproteobacteria_unclassified	Alphaproteobacteria_unclassified	Alphaproteobacteria_unclassified	2041	0	0	0	0	0	0	0	0	50	259	41	15	56	195	96	11	6	0	0	0	0	0	0	4	87	7	42	138	57	47	15	2	4	0	0	0	2	35	42	29	9	29
Otu00755	Bacteria	Firmicutes	Clostridia	Clostridiales	Clostridiaceae_1	Clostridium_sensu_stricto_13	2085	81	64	25	24	28	82	95	81	103	61	59	46	41	37	57	26	11	26	10	11	7	56	23	25	21	18	13	9	14	24	7	5	90	7	21	9	5	4	8	12	8	6
Otu00756	Bacteria	Chloroflexi	Dehalococcoidia	GIF9	GIF9_fa	GIF9_ge	1435	0	0	0	0	0	0	0	0	0	2	0	0	0	0	1	0	0	0	0	0	0	0	0	0	0	9	3	59	0	91	0	9	175	0	0	0	0	0	9	8	6	232
Otu00757	Bacteria	Chloroflexi	Anaerolineae	SBR1031	A4b	A4b_ge	664	80	5	3	0	0	18	1	0	6	11	28	1	2	0	4	8	3	37	12	5	3	1	2	0	0	0	1	0	0	0	12	0	3	35	13	0	0	1	1	1	0	1
Otu00758	Bacteria	Chloroflexi	Chloroflexia	Thermomicrobiales	JG30-KF-CM45	JG30-KF-CM45_ge	1840	37	82	20	16	27	25	19	39	41	33	57	26	18	6	3	0	2	73	28	86	15	29	14	28	3	65	1	1	0	2	2	0	3	22	22	61	11	2	0	1	0	1
Otu00759	Bacteria	Planctomycetes	Phycisphaerae	CCM11a	CCM11a_fa	CCM11a_ge	2638	0	0	0	0	0	0	0	0	6	1	0	10	16	321	210	217	37	0	0	0	0	0	0	0	0	1	10	257	49	164	21	7	3	0	0	1	0	0	25	32	36	5
Otu00760	Bacteria	Proteobacteria	Deltaproteobacteria	Syntrophobacterales	Syntrophaceae	Desulfomonile	1468	0	0	0	0	0	0	0	0	1	2	1	1	4	14	2	4	2	0	0	0	0	0	0	0	0	4	0	35	1	84	4	18	416	0	0	2	0	0	16	10	7	33
Otu00761	Bacteria	Proteobacteria	Alphaproteobacteria	Rhodobacterales	Rhodobacteraceae	Rhodobacteraceae_unclassified	1213	12	3	0	4	0	3	2	29	44	57	3	1	2	1	5	12	8	2	2	2	0	13	10	18	1	1	1	9	3	0	346	0	0	6	9	2	5	0	1	3	9	2
Otu00762	Bacteria	Planctomycetes	Planctomycetacia	Pirellulales	Pirellulaceae	Pir4_lineage	1119	17	46	37	10	18	19	26	23	33	15	17	35	10	13	3	8	17	15	8	13	7	0	6	11	2	15	1	4	3	10	10	20	34	16	6	6	3	2	4	8	6	2
Otu00763	Bacteria	Bacteroidetes	Bacteroidia	Sphingobacteriales	Sphingobacteriaceae	Sphingobacteriaceae_unclassified	808	93	37	16	7	5	19	5	5	20	7	30	0	4	0	21	42	18	14	13	4	1	2	1	3	1	1	0	0	0	2	17	4	4	29	19	2	3	2	2	0	2	0
Otu00764	Bacteria	Bacteroidetes	Bacteroidia	Chitinophagales	Saprospiraceae	uncultured	1517	32	292	215	91	33	28	2	16	15	7	2	2	4	0	1	3	5	9	42	8	8	5	4	4	0	8	0	1	0	0	1	0	0	65	43	19	12	5	0	0	0	0
Otu00765	Bacteria	Planctomycetes	Phycisphaerae	Tepidisphaerales	WD2101_soil_group	WD2101_soil_group_ge	692	99	75	19	7	18	11	0	0	10	0	15	1	1	0	1	1	0	36	12	2	0	0	0	1	0	0	0	0	0	0	2	1	0	76	6	2	1	0	0	1	0	0
Otu00766	Bacteria	Proteobacteria	Alphaproteobacteria	Rhodospirillales	Magnetospiraceae	Magnetovibrio	1843	0	0	0	0	0	0	0	0	0	0	0	2	10	2	0	2	84	0	0	0	0	0	0	0	0	0	0	33	11	7	0	70	118	0	0	0	0	0	10	4	208	62
Otu00767	Bacteria	Chloroflexi	Gitt-GS-136	Gitt-GS-136_or	Gitt-GS-136_fa	Gitt-GS-136_ge	641	0	10	52	87	1	3	8	6	12	38	50	4	8	4	5	1	2	0	3	3	0	5	3	5	14	9	3	1	1	3	2	1	1	0	3	2	2	2	0	1	1	1
Otu00768	Bacteria	Actinobacteria	Actinobacteria	Micrococcales	Bogoriellaceae	Georgenia	929	56	46	14	6	1	7	76	7	17	3	7	0	1	0	3	1	0	86	17	8	7	8	5	12	1	0	0	1	1	1	2	0	0	42	8	1	0	1	1	1	0	1
Otu00769	Bacteria	Proteobacteria	Gammaproteobacteria	Nitrosococcales	Methylophagaceae	Methylophaga	2763	0	0	0	0	1	0	17	37	218	124	87	114	121	35	181	46	22	0	0	0	2	11	23	13	25	37	1	69	11	79	1	1	4	0	1	2	6	23	93	72	12	18
Otu00770	Bacteria	Acidobacteria	Holophagae	Subgroup_7	Subgroup_7_fa	Subgroup_7_ge	1215	34	3	2	6	6	6	9	12	21	23	17	12	10	20	6	4	14	8	2	2	0	1	4	5	9	6	24	35	9	26	11	10	16	96	31	0	28	21	5	7	8	20
Otu00771	Bacteria	Proteobacteria	Deltaproteobacteria	Syntrophobacterales	Syntrophaceae	uncultured	866	0	0	0	0	0	0	1	0	1	1	0	0	0	2	2	1	1	0	0	0	0	0	0	0	0	2	5	13	0	35	1	11	73	1	0	0	0	0	6	1	2	142
Otu00772	Bacteria	Chloroflexi	Dehalococcoidia	SAR202_clade	SAR202_clade_fa	SAR202_clade_ge	469	0	0	4	2	10	7	11	14	30	21	12	21	12	10	20	8	2	0	0	5	3	1	12	6	3	22	1	14	3	10	1	0	0	0	1	0	1	3	4	4	2	2
Otu00773	Bacteria	Proteobacteria	Alphaproteobacteria	SAR11_clade	Clade_I	Clade_Ia	297	6	4	7	2	10	7	1	3	7	12	6	5	13	3	1	1	3	8	4	1	1	5	0	2	1	2	0	7	2	10	0	3	4	0	1	0	2	4	0	0	0	0
Otu00774	Bacteria	Acidobacteria	Subgroup_6	Subgroup_6_or	Subgroup_6_fa	Subgroup_6_ge	1286	0	0	2	1	0	3	9	5	22	41	45	45	24	46	60	86	31	0	0	1	2	1	0	2	11	23	26	70	28	59	29	10	8	0	0	0	1	0	25	34	11	12
Otu00775	Bacteria	Proteobacteria	Gammaproteobacteria	Betaproteobacteriales	Nitrosomonadaceae	MND1	1403	0	0	0	0	0	0	0	0	4	2	0	0	0	1	3	186	255	0	0	0	0	0	0	0	0	0	0	3	0	15	0	145	132	0	0	0	0	0	13	7	69	22
Otu00776	Bacteria	Planctomycetes	Planctomycetacia	Pirellulales	Pirellulaceae	Pir4_lineage	3084	0	0	0	0	4	67	100	89	211	342	52	111	43	322	79	93	18	0	0	9	27	28	31	45	37	15	19	73	21	78	22	1	11	0	0	2	8	17	25	77	4	113
Otu00777	Bacteria	Chloroflexi	Anaerolineae	Anaerolineales	Anaerolineaceae	uncultured	2020	0	0	0	1	0	2	17	20	77	27	54	85	24	81	46	113	34	0	0	2	1	6	5	5	9	22	5	72	28	179	21	20	20	0	0	0	2	1	35	103	148	40
Otu00778	Bacteria	Chloroflexi	KD4-96	KD4-96_or	KD4-96_fa	KD4-96_ge	149	0	1	0	0	1	0	0	2	10	4	8	0	1	2	2	2	1	0	1	0	0	0	1	0	0	0	0	4	0	3	0	5	1	0	0	0	0	1	2	1	2	1
Otu00779	Bacteria	Chloroflexi	Anaerolineae	SBR1031	A4b	A4b_ge	2095	0	0	0	0	0	0	0	1	11	26	32	194	54	186	49	107	14	0	0	0	0	0	0	1	5	14	1	93	21	103	45	9	1	0	0	0	0	0	52	169	46	59
Otu00780	Bacteria	Planctomycetes	Phycisphaerae	Tepidisphaerales	WD2101_soil_group	WD2101_soil_group_ge	682	5	6	19	11	48	10	21	15	33	13	19	29	5	6	5	12	4	4	5	3	5	7	1	5	0	26	4	7	0	7	0	0	3	1	7	4	1	2	0	3	0	3
Otu00781	Bacteria	Proteobacteria	Alphaproteobacteria	Elsterales	uncultured	uncultured_ge	783	8	156	96	82	3	12	1	3	8	2	1	0	1	3	2	7	4	15	25	3	1	5	7	4	0	0	0	1	2	1	0	1	5	27	20	0	4	0	1	0	2	0
Otu00782	Bacteria	Planctomycetes	Planctomycetacia	Pirellulales	Pirellulaceae	Pir4_lineage	1225	0	31	56	27	57	60	43	58	56	36	23	49	5	17	23	26	2	2	22	31	11	27	11	15	4	7	5	6	2	15	6	1	7	0	5	12	11	10	0	4	5	2
Otu00783	Bacteria	Proteobacteria	Gammaproteobacteria	Betaproteobacteriales	Rhodocyclaceae	Rhodocyclaceae_unclassified	1886	1	4	14	3	1	3	0	2	19	5	0	1	0	2	30	6	1	6	17	24	8	9	54	29	0	2	0	9	0	11	0	1	0	9	39	3	17	3	4	40	5	7
Otu00784	Bacteria	Gemmatimonadetes	BD2-11_terrestrial_group	BD2-11_terrestrial_group_or	BD2-11_terrestrial_group_fa	BD2-11_terrestrial_group_ge	683	0	0	0	0	1	3	8	9	22	32	27	15	12	24	21	46	14	0	0	0	1	0	8	0	6	8	3	20	4	23	5	2	3	0	0	2	2	0	15	33	7	30
Otu00785	Bacteria	Planctomycetes	Planctomycetacia	Pirellulales	Pirellulaceae	Pirellulaceae_unclassified	2552	0	1	1	2	2	6	55	50	85	66	136	165	133	62	68	15	8	0	0	6	18	13	17	17	35	177	66	66	27	15	3	1	4	0	4	6	18	38	9	3	5	20
Otu00786	Bacteria	Bacteroidetes	Bacteroidia	Chitinophagales	Chitinophagaceae	uncultured	1025	8	30	40	20	47	27	29	15	26	30	18	26	4	32	26	45	35	8	9	12	3	4	3	4	5	33	0	3	0	6	1	1	5	7	3	7	3	0	10	8	8	2
Otu00787	Bacteria	Actinobacteria	Thermoleophilia	Gaiellales	uncultured	uncultured_ge	1069	2	26	19	32	2	5	51	115	132	56	19	3	2	3	1	0	4	6	11	3	2	50	36	21	16	1	1	7	0	0	0	0	4	3	25	2	10	2	0	1	1	0
Otu00788	Bacteria	Proteobacteria	Gammaproteobacteria	Betaproteobacteriales	Burkholderiaceae	Polaromonas	1215	20	3	0	1	0	1	0	0	6	7	1	1	2	0	6	19	4	1	0	1	0	0	0	4	0	0	0	0	0	0	137	0	1	2	1	0	1	1	2	4	2	0
Otu00789	Bacteria	Chloroflexi	Anaerolineae	Anaerolineales	Anaerolineaceae	uncultured	504	0	2	2	1	1	3	21	4	5	8	19	42	13	9	9	0	6	0	3	3	4	2	0	3	2	31	8	7	1	5	2	1	1	0	1	3	4	7	5	2	2	1
Otu00790	Bacteria	Proteobacteria	Alphaproteobacteria	Rhizobiales	KF-JG30-B3	KF-JG30-B3_ge	1170	0	4	4	10	1	1	2	7	24	47	40	19	13	1	10	72	12	0	1	1	3	7	17	7	14	24	8	12	0	0	3	1	20	0	16	7	52	18	3	6	5	4
Otu00791	Bacteria	Chloroflexi	Dehalococcoidia	S085	S085_fa	S085_ge	1173	0	0	0	1	3	1	2	5	107	205	16	4	5	22	46	86	16	0	0	2	3	2	8	11	28	16	8	41	12	18	12	0	8	0	0	2	6	5	7	6	19	94
Otu00792	Bacteria	Chloroflexi	Anaerolineae	SBR1031	A4b	A4b_ge	1879	0	0	0	0	0	0	3	1	3	14	25	46	54	101	97	92	13	0	0	0	0	0	0	1	9	23	10	91	6	129	16	3	2	0	0	0	0	1	87	231	16	29
Otu00793	Bacteria	Acidobacteria	Subgroup_15	Subgroup_15_or	Subgroup_15_fa	Subgroup_15_ge	853	0	0	0	0	0	0	4	12	30	31	16	10	17	49	34	21	5	0	0	0	0	2	16	4	6	7	39	40	5	14	6	0	4	0	0	1	7	17	6	5	9	14
Otu00794	Bacteria	Proteobacteria	Alphaproteobacteria	Rhodovibrionales	Kiloniellaceae	Kiloniellaceae_unclassified	1415	0	0	0	0	0	7	25	2	70	162	7	10	14	555	21	58	1	0	0	3	8	0	0	3	8	2	6	16	4	15	11	0	0	0	0	1	3	1	15	59	3	148
Otu00795	Bacteria	Actinobacteria	Thermoleophilia	Gaiellales	Gaiellaceae	Gaiella	771	3	11	7	6	0	1	23	27	42	16	17	44	38	11	6	1	9	3	5	2	5	20	13	4	1	7	19	20	1	10	2	0	5	9	12	4	0	10	3	1	1	0
Otu00796	Bacteria	Planctomycetes	Planctomycetacia	Pirellulales	Pirellulaceae	Pirellulaceae_unclassified	1740	0	0	1	0	3	5	0	5	61	125	128	30	29	39	37	75	23	0	0	8	0	1	2	12	11	76	53	54	17	25	29	31	19	0	0	0	2	14	14	18	13	12
Otu00797	Bacteria	Acidobacteria	Thermoanaerobaculia	Thermoanaerobaculales	Thermoanaerobaculaceae	Subgroup_10	1489	135	23	7	0	0	6	0	0	19	12	14	12	22	20	8	20	1	103	92	8	1	36	0	22	0	6	2	5	0	1	6	0	3	266	10	15	2	8	17	4	8	0
Otu00798	Bacteria	Chloroflexi	Anaerolineae	Caldilineales	Caldilineaceae	uncultured	873	1	11	23	21	10	22	26	18	39	19	27	33	12	5	5	3	0	4	5	27	12	11	10	7	2	21	1	6	1	5	2	0	3	3	6	16	1	3	3	6	3	16
Otu00799	Bacteria	Gemmatimonadetes	Gemmatimonadetes	Gemmatimonadales	Gemmatimonadaceae	uncultured	1073	0	1	0	0	0	0	2	8	33	40	25	24	32	39	25	19	10	1	0	3	0	0	7	4	30	14	18	41	7	69	6	8	9	0	5	4	19	65	9	48	5	16
Otu00800	Bacteria	Proteobacteria	Deltaproteobacteria	Myxococcales	Haliangiaceae	Haliangium	2222	1	0	0	0	1	3	8	7	77	44	335	175	124	17	34	5	67	0	0	0	0	4	8	1	28	155	10	25	0	23	0	0	6	0	0	0	2	22	14	6	1	5
Otu00801	Bacteria	Actinobacteria	Actinobacteria	Pseudonocardiales	Pseudonocardiaceae	Pseudonocardia	1912	135	121	58	8	55	28	26	13	23	7	37	40	22	3	7	0	4	52	42	18	22	25	5	21	0	38	10	1	1	2	4	0	2	64	20	14	10	3	2	5	4	14
Otu00802	Bacteria	Bacteria_unclassified	Bacteria_unclassified	Bacteria_unclassified	Bacteria_unclassified	Bacteria_unclassified	2268	2	0	5	4	0	0	39	49	195	202	126	34	63	4	8	1	31	0	1	0	4	66	53	22	52	52	23	5	4	4	2	0	3	0	5	1	74	34	4	0	4	6
Otu00803	Bacteria	Proteobacteria	Gammaproteobacteria	Cellvibrionales	Halieaceae	Haliea	2504	0	0	5	3	12	24	34	9	70	100	113	163	79	55	92	34	26	0	0	9	5	1	12	14	35	33	2	74	15	118	1	4	3	1	0	3	4	23	49	60	10	26
Otu00804	Bacteria	Verrucomicrobia	Verrucomicrobiae	Pedosphaerales	Pedosphaeraceae	Pedosphaeraceae_ge	1234	0	10	25	17	16	8	28	22	37	32	76	239	82	9	9	3	7	0	6	6	10	5	4	16	8	42	1	12	2	2	0	1	1	0	11	15	6	5	5	4	0	3
Otu00805	Bacteria	Verrucomicrobia	Verrucomicrobiae	Pedosphaerales	Pedosphaeraceae	Pedosphaeraceae_ge	948	1	2	0	0	0	0	0	1	7	35	6	6	2	126	34	279	20	2	0	0	0	0	1	0	2	5	0	10	2	49	4	4	18	0	0	0	1	0	2	9	27	4
Otu00806	Bacteria	Bacteroidetes	Bacteroidia	Chitinophagales	uncultured	uncultured_ge	1157	0	0	0	0	5	12	26	8	56	60	31	24	20	50	27	36	23	0	0	0	1	6	3	5	5	15	5	42	8	75	1	24	17	0	0	0	3	11	17	80	12	4
Otu00807	Archaea	Nanoarchaeaeota	Woesearchaeia	Woesearchaeia_or	Woesearchaeia_fa	Woesearchaeia_ge	2153	0	0	0	0	0	0	0	0	0	1	0	0	0	0	1	0	1	0	0	0	0	0	0	0	0	4	0	8	0	19	1	466	193	0	0	0	0	0	8	16	2	4
Otu00808	Bacteria	Bacteria_unclassified	Bacteria_unclassified	Bacteria_unclassified	Bacteria_unclassified	Bacteria_unclassified	139	0	0	0	0	0	0	0	0	1	3	3	10	6	3	3	4	7	0	0	0	0	0	0	0	1	2	4	8	1	2	1	2	2	0	0	0	0	1	1	2	3	1
Otu00809	Bacteria	Actinobacteria	MB-A2-108	MB-A2-108_or	MB-A2-108_fa	MB-A2-108_ge	1360	0	0	0	0	0	0	1	106	488	85	7	2	7	0	2	0	4	0	0	0	0	44	201	52	5	0	0	4	2	0	0	0	2	0	0	0	1	0	2	1	0	2
Otu00810	Bacteria	Chloroflexi	Anaerolineae	SBR1031	SBR1031_fa	SBR1031_ge	164	0	0	0	0	0	0	0	0	1	0	7	7	9	4	8	3	2	0	0	0	0	0	0	0	1	5	0	8	1	2	0	0	0	0	0	0	0	0	3	0	1	0
Otu00811	Bacteria	Spirochaetes	Spirochaetia	Spirochaetales	Spirochaetaceae	Spirochaeta_2	2270	0	0	0	0	0	0	0	0	1	5	0	0	1	0	2	11	17	0	1	0	0	0	0	0	0	2	1	22	2	51	13	127	735	0	0	0	0	0	7	6	46	111
Otu00812	Bacteria	Proteobacteria	Alphaproteobacteria	Alphaproteobacteria_unclassified	Alphaproteobacteria_unclassified	Alphaproteobacteria_unclassified	143	0	0	3	0	5	4	2	1	5	8	6	8	1	9	4	2	0	0	0	8	0	0	0	1	0	6	0	5	0	2	0	0	0	0	0	1	2	0	1	0	0	1
Otu00813	Bacteria	Actinobacteria	Acidimicrobiia	Microtrichales	uncultured	uncultured_ge	855	14	40	25	8	32	16	16	16	32	36	17	30	4	16	9	16	5	15	12	26	4	5	1	4	6	1	0	8	5	11	3	1	1	10	4	32	5	2	2	3	3	2
Otu00814	Bacteria	Chloroflexi	Anaerolineae	Anaerolineales	Anaerolineaceae	uncultured	1258	0	7	11	4	3	4	10	30	25	14	26	8	8	4	8	5	34	2	8	1	1	12	6	6	5	0	3	5	1	37	1	201	88	0	14	11	9	0	12	40	3	0
Otu00815	Bacteria	Acidobacteria	Holophagae	Subgroup_7	Subgroup_7_fa	Subgroup_7_ge	1346	4	57	16	19	5	8	74	17	27	18	4	10	11	12	1	8	25	6	1	3	7	5	5	8	9	20	22	34	5	6	1	24	70	33	41	0	47	17	2	3	8	5
Otu00816	Bacteria	Acidobacteria	Subgroup_6	Subgroup_6_or	Subgroup_6_fa	Subgroup_6_ge	1480	0	11	22	16	3	8	12	29	39	78	125	202	48	44	26	47	7	0	1	2	1	5	1	3	16	45	4	18	4	17	9	1	1	0	4	5	26	16	8	35	8	16
Otu00817	Bacteria	Proteobacteria	Alphaproteobacteria	Rhizobiales	Hyphomicrobiaceae	Hyphomicrobium	683	8	8	3	0	0	2	9	28	52	39	3	11	21	36	22	8	6	2	0	1	0	8	12	5	2	1	36	35	9	8	9	3	15	3	2	2	0	17	4	7	8	8
Otu00818	Bacteria	Acidobacteria	Thermoanaerobaculia	Thermoanaerobaculales	Thermoanaerobaculaceae	Subgroup_10	1421	126	52	14	7	1	15	0	3	3	1	13	1	0	0	1	0	1	158	75	8	2	1	17	10	0	0	0	0	2	0	1	0	1	198	104	2	1	1	0	0	2	0
Otu00819	Archaea	Nanoarchaeaeota	Woesearchaeia	Woesearchaeia_or	Woesearchaeia_fa	Woesearchaeia_ge	3654	0	0	0	0	0	0	0	0	4	12	15	14	22	310	230	133	26	0	0	0	0	0	0	0	5	25	50	317	42	316	72	51	154	0	0	0	0	0	78	160	44	21
Otu00820	Bacteria	Proteobacteria	Gammaproteobacteria	Acidithiobacillales	Acidithiobacillaceae	TX1A-55	1087	0	0	0	0	0	0	0	1	32	28	65	183	38	104	10	60	4	0	0	0	0	0	3	0	7	22	10	73	6	34	5	2	0	0	0	0	0	0	12	26	10	9
Otu00821	Bacteria	Chloroflexi	Dehalococcoidia	S085	S085_fa	S085_ge	440	2	10	6	5	2	7	3	12	28	22	7	5	13	6	5	1	1	2	3	1	1	1	15	7	11	6	6	8	2	2	0	0	1	4	2	1	22	5	3	1	1	1
Otu00822	Bacteria	Chloroflexi	Anaerolineae	Ardenticatenales	uncultured	uncultured_ge	2174	0	35	92	57	33	29	83	71	138	112	100	35	42	8	29	16	22	1	21	4	19	13	18	10	15	69	11	59	1	41	10	0	0	0	9	10	22	3	20	23	5	9
Otu00823	Bacteria	Verrucomicrobia	Verrucomicrobiae	Pedosphaerales	Pedosphaeraceae	Pedosphaeraceae_ge	999	1	21	17	10	23	10	19	5	21	33	12	37	17	18	14	15	12	15	25	43	10	6	2	8	0	20	0	10	2	4	0	2	9	12	9	7	4	4	6	3	3	5
Otu00824	Bacteria	Latescibacteria	Latescibacteria_cl	Latescibacteria_or	Latescibacteria_fa	Latescibacteria_ge	2584	0	0	0	0	0	0	0	0	34	187	71	31	78	120	80	46	11	0	0	0	0	0	0	1	43	44	63	99	63	80	16	2	3	0	0	0	0	213	12	2	131	5
Otu00825	Bacteria	Chloroflexi	Anaerolineae	Anaerolineales	Anaerolineaceae	uncultured	1294	0	0	0	0	0	0	0	0	0	4	0	0	0	1	1	5	11	0	0	0	0	0	0	0	0	2	0	27	0	69	0	30	112	0	0	0	0	0	3	5	4	39
Otu00826	Bacteria	Proteobacteria	Gammaproteobacteria	Betaproteobacteriales	Nitrosomonadaceae	MND1	147	0	0	0	0	0	0	0	0	4	5	12	12	4	3	6	4	2	0	0	0	0	0	0	0	0	7	0	5	0	0	0	0	1	0	0	0	0	0	3	1	2	3
Otu00827	Bacteria	Chloroflexi	Anaerolineae	Anaerolineales	Anaerolineaceae	Anaerolinea	549	0	7	5	2	1	1	2	1	3	1	3	6	1	4	1	1	21	2	9	1	0	4	4	2	2	6	1	2	1	8	0	73	80	12	10	4	1	3	1	7	7	8
Otu00828	Bacteria	Bacteroidetes	Bacteroidia	Chitinophagales	Chitinophagaceae	Flavitalea	1151	237	140	43	8	2	29	0	0	27	9	44	3	5	0	5	5	2	41	21	2	1	3	1	1	0	0	1	0	3	0	5	0	2	154	17	0	0	0	1	1	3	1
Otu00829	Bacteria	Gemmatimonadetes	Gemmatimonadetes	Gemmatimonadales	Gemmatimonadaceae	uncultured	1528	0	0	0	0	0	0	0	0	17	20	5	6	43	48	61	39	38	0	0	0	0	0	2	0	1	1	27	98	13	71	16	11	12	0	0	0	0	4	10	13	111	83
Otu00830	Bacteria	Bacteroidetes	Bacteroidia	Cytophagales	Cyclobacteriaceae	uncultured	1269	0	0	0	0	0	0	0	0	5	4	4	9	3	65	62	185	117	0	0	0	0	0	0	0	1	8	4	31	7	99	37	9	40	0	0	0	0	0	8	50	117	5
Otu00831	Bacteria	Proteobacteria	Gammaproteobacteria	Salinisphaerales	Solimonadaceae	Polycyclovorans	2436	0	0	0	0	0	0	2	97	347	319	75	27	37	122	105	137	12	0	0	0	0	27	27	23	28	2	19	90	42	59	29	1	3	0	0	0	0	7	23	3	10	3
Otu00832	Archaea	Nanoarchaeaeota	Woesearchaeia	Woesearchaeia_or	Woesearchaeia_fa	Woesearchaeia_ge	2444	0	0	0	0	0	0	0	0	0	0	0	1	2	4	0	1	4	0	0	0	0	0	0	0	0	0	0	1	0	7	0	11	6	0	0	0	0	0	4	20	36	19
Otu00833	Bacteria	Proteobacteria	Alphaproteobacteria	Rhizobiales	Hyphomicrobiaceae	Pedomicrobium	592	11	20	4	0	0	0	10	13	29	26	18	24	16	6	5	7	5	1	4	4	0	7	10	0	2	21	10	5	2	7	1	2	9	10	1	2	5	7	3	5	4	9
Otu00834	Bacteria	Gemmatimonadetes	S0134_terrestrial_group	S0134_terrestrial_group_or	S0134_terrestrial_group_fa	S0134_terrestrial_group_ge	1511	0	310	125	42	14	29	27	10	19	0	4	1	2	0	5	0	6	44	29	16	16	3	1	4	0	0	0	0	1	1	1	0	2	29	37	1	0	1	0	2	0	0
Otu00835	Bacteria	Gemmatimonadetes	Gemmatimonadetes	Gemmatimonadales	Gemmatimonadaceae	uncultured	1145	0	0	0	0	0	1	8	10	58	74	39	16	15	44	65	35	13	0	0	0	0	1	8	10	14	8	15	72	14	56	17	4	1	0	0	0	1	13	14	17	13	1
Otu00836	Bacteria	Planctomycetes	Planctomycetacia	Pirellulales	Pirellulaceae	Rhodopirellula	875	0	1	3	4	2	4	29	34	50	52	28	17	4	10	9	10	3	0	2	0	7	35	27	17	14	25	14	21	12	5	2	3	0	0	6	3	16	6	4	2	8	1
Otu00837	Bacteria	Proteobacteria	Deltaproteobacteria	Desulfuromonadales	Desulfuromonadaceae	Desulfuromonadaceae_unclassified	149	0	0	0	0	0	0	0	0	1	0	3	0	3	6	20	8	1	0	0	0	0	0	0	1	0	2	0	0	0	0	0	1	0	0	0	0	1	0	5	4	1	0
Otu00838	Bacteria	Chloroflexi	KD4-96	KD4-96_or	KD4-96_fa	KD4-96_ge	397	0	1	0	0	1	2	1	35	96	69	1	1	4	12	5	5	2	0	0	0	0	5	18	2	0	1	2	5	2	1	0	0	2	0	0	0	0	0	0	0	9	1
Otu00839	Bacteria	Proteobacteria	Gammaproteobacteria	Xanthomonadales	Xanthomonadaceae	Pseudoxanthomonas	1625	228	80	83	26	39	40	2	26	61	13	26	17	9	1	28	19	8	22	12	42	2	32	11	15	8	0	0	6	1	2	28	0	1	11	11	12	13	4	4	6	4	2
Otu00840	Bacteria	Planctomycetes	OM190	OM190_or	OM190_fa	OM190_ge	831	0	1	19	2	2	0	24	21	71	44	26	56	12	4	4	1	3	0	0	2	4	27	30	9	11	17	4	1	0	6	0	1	1	0	12	6	29	14	0	2	1	1
Otu00841	Bacteria	Actinobacteria	Acidimicrobiia	IMCC26256	IMCC26256_fa	IMCC26256_ge	535	1	6	1	4	2	0	11	4	16	35	14	22	17	14	14	14	9	0	0	2	12	10	4	6	5	18	4	11	1	9	7	3	6	1	5	15	5	5	1	2	4	2
Otu00842	Bacteria	Planctomycetes	Planctomycetacia	Pirellulales	Pirellulaceae	Pirellulaceae_unclassified	998	0	2	6	7	4	10	66	48	109	64	9	2	3	14	20	9	3	0	17	5	8	41	43	26	10	2	7	17	10	9	9	1	1	0	4	0	7	3	0	3	3	2
Otu00843	Bacteria	Entotheonellaeota	Entotheonellia	Entotheonellales	Entotheonellaceae	Entotheonellaceae_ge	1617	0	0	0	2	0	0	1	12	80	285	115	33	38	23	16	47	13	0	2	0	0	6	4	7	79	42	12	24	2	7	10	0	4	0	1	1	14	5	25	44	10	91
Otu00844	Bacteria	Proteobacteria	Gammaproteobacteria	Cellvibrionales	Cellvibrionaceae	Cellvibrio	1789	0	3	0	2	20	29	37	14	39	5	18	13	25	32	65	89	4	0	0	2	0	0	0	0	2	0	2	16	10	289	1	5	2	0	0	3	0	3	17	14	126	11
Otu00845	Bacteria	Actinobacteria	Thermoleophilia	Gaiellales	Gaiellaceae	Gaiella	221	18	14	5	3	1	1	1	0	2	1	1	6	2	7	2	1	3	2	3	0	3	1	3	3	0	1	0	5	0	1	1	2	2	10	6	2	1	0	1	1	0	0
Otu00846	Bacteria	Acidobacteria	Subgroup_21	Subgroup_21_or	Subgroup_21_fa	Subgroup_21_ge	1583	1	0	0	3	1	5	9	11	28	67	37	46	43	68	65	160	12	0	1	1	1	9	7	7	17	102	3	41	7	55	22	4	4	0	5	5	4	11	20	17	16	22
Otu00847	Bacteria	Proteobacteria	Gammaproteobacteria	EPR3968-O8a-Bc78	EPR3968-O8a-Bc78_fa	EPR3968-O8a-Bc78_ge	137	0	0	0	0	0	0	0	0	3	8	10	23	6	11	0	5	1	0	0	0	0	0	0	1	1	1	0	1	0	0	0	4	0	0	0	0	0	0	5	5	4	0
Otu00848	Bacteria	Proteobacteria	Gammaproteobacteria	Gammaproteobacteria_unclassified	Gammaproteobacteria_unclassified	Gammaproteobacteria_unclassified	2495	0	0	50	5	1	1	435	35	269	134	21	11	4	3	5	2	3	1	0	0	8	53	76	37	17	0	26	6	6	2	0	0	1	0	3	5	91	166	26	7	13	13
Otu00849	Bacteria	Acidobacteria	Subgroup_5	Subgroup_5_or	Subgroup_5_fa	Subgroup_5_ge	815	0	1	3	1	8	4	16	12	46	29	22	21	14	32	26	60	21	1	0	7	4	4	10	6	6	10	10	28	9	21	12	1	1	0	0	2	3	2	7	19	9	13
Otu00850	Bacteria	Elusimicrobia	Lineage_IIb	Lineage_IIb_or	Lineage_IIb_fa	Lineage_IIb_ge	358	16	42	20	15	14	7	0	0	3	2	5	1	2	0	0	1	1	5	15	4	1	5	4	1	0	1	0	0	0	0	0	1	1	20	11	3	2	2	0	0	0	0
Otu00851	Bacteria	Planctomycetes	Planctomycetacia	Pirellulales	Pirellulaceae	Pir4_lineage	955	0	0	0	0	0	0	0	0	0	1	2	6	3	21	9	30	38	0	0	0	0	1	0	0	0	1	0	4	5	40	46	106	120	0	0	0	0	0	3	16	121	4
Otu00852	Bacteria	Bacteroidetes	Bacteroidia	Bacteroidales	Prolixibacteraceae	uncultured	2312	0	0	0	0	0	0	0	2	6	9	76	166	56	35	38	157	16	0	0	0	0	0	0	0	9	93	0	62	1	17	23	16	11	0	0	0	1	5	63	222	48	43
Otu00853	Bacteria	Proteobacteria	Deltaproteobacteria	Desulfuromonadales	Geobacteraceae	Geobacter	545	0	3	7	0	3	3	0	3	36	7	5	6	2	2	14	7	0	1	4	3	0	3	1	3	1	2	1	5	1	10	8	3	11	4	16	10	6	10	2	3	11	15
Otu00854	Bacteria	Acidobacteria	Acidobacteriia	Acidobacteriales	uncultured	uncultured_ge	1584	0	1	0	0	0	0	25	29	39	43	13	4	15	46	55	1	9	0	0	0	4	25	26	11	3	6	13	63	6	41	39	27	173	0	3	1	7	0	6	6	31	12
Otu00855	Bacteria	Proteobacteria	Gammaproteobacteria	Betaproteobacteriales	Nitrosomonadaceae	MND1	142	0	0	0	0	0	0	0	1	7	2	4	17	7	7	5	4	3	0	0	0	1	0	1	1	2	6	0	1	0	3	0	1	0	0	0	0	2	0	3	3	1	3
Otu00856	Bacteria	Proteobacteria	Deltaproteobacteria	Deltaproteobacteria_unclassified	Deltaproteobacteria_unclassified	Deltaproteobacteria_unclassified	687	0	0	0	0	0	3	3	8	47	36	30	6	3	23	52	56	6	0	1	2	0	1	1	1	5	3	2	24	6	16	2	5	8	0	2	4	1	10	10	4	13	4
Otu00857	Bacteria	Planctomycetes	Planctomycetacia	Planctomycetales	Rubinisphaeraceae	Planctomicrobium	723	3	16	21	4	1	6	28	25	18	32	30	30	25	13	6	2	9	7	7	17	3	8	4	12	7	16	7	6	9	0	1	0	0	1	5	5	3	9	3	14	0	42
Otu00858	Bacteria	Firmicutes	Bacilli	Bacillales	Family_XII	Exiguobacterium	2548	0	0	0	0	0	0	0	0	0	0	0	1	1	1	0	0	2	15	8	0	1	0	0	3	0	0	0	0	1	1	95	1	2	0	4	0	0	0	0	1	1	2
Otu00859	Bacteria	Acidobacteria	Subgroup_6	Subgroup_6_or	Subgroup_6_fa	Subgroup_6_ge	667	1	7	1	7	0	2	2	6	16	6	14	108	39	1	1	0	25	0	1	2	0	4	3	3	1	14	13	1	0	0	1	0	0	2	0	2	1	27	2	1	1	1
Otu00860	Bacteria	Acidobacteria	Subgroup_26	Subgroup_26_or	Subgroup_26_fa	Subgroup_26_ge	2149	0	0	0	1	0	0	47	48	107	84	24	11	28	67	198	37	15	0	0	0	5	5	24	11	20	7	69	119	39	127	34	0	1	0	0	4	22	22	34	8	24	9
Otu00861	Bacteria	Firmicutes	Clostridia	Clostridiales	Clostridiales_unclassified	Clostridiales_unclassified	736	1	2	1	1	4	2	3	11	18	6	5	10	5	8	15	14	8	2	1	2	1	13	5	2	0	6	2	4	1	16	7	7	15	2	55	6	7	11	20	94	20	9
Otu00862	Bacteria	Proteobacteria	Gammaproteobacteria	Oceanospirillales	Pseudohongiellaceae	Pseudohongiella	957	0	0	0	0	0	0	3	8	47	35	17	19	17	84	51	95	8	0	0	0	0	0	1	2	9	4	0	49	10	45	0	0	0	0	0	0	0	3	17	72	4	36
Otu00863	Bacteria	Actinobacteria	Thermoleophilia	Solirubrobacterales	67-14	67-14_ge	632	2	8	3	3	2	4	7	15	11	41	28	17	14	10	18	2	7	2	4	6	1	4	0	6	6	24	11	3	4	9	5	2	13	1	8	10	10	3	8	6	5	2
Otu00864	Bacteria	Proteobacteria	Gammaproteobacteria	Betaproteobacteriales	Rhodocyclaceae	Azoarcus	133	1	0	2	0	0	0	0	1	5	4	4	8	4	3	10	14	1	0	0	1	0	0	0	1	0	2	0	1	1	2	0	0	0	0	0	0	0	1	1	1	0	1
Otu00865	Bacteria	Epsilonbacteraeota	Campylobacteria	Campylobacterales	Thiovulaceae	Sulfurimonas	1828	0	0	0	0	0	0	0	0	0	0	6	0	3	31	19	20	10	0	0	0	0	0	0	0	1	20	0	43	13	102	0	4	8	0	0	0	0	0	14	36	6	7
Otu00866	Bacteria	Acidobacteria	Thermoanaerobaculia	Thermoanaerobaculales	Thermoanaerobaculaceae	Subgroup_10	2552	0	0	0	0	0	0	0	0	5	45	29	37	30	248	114	252	55	0	0	0	0	0	0	1	7	11	17	151	112	291	160	9	2	0	0	0	0	0	29	57	19	8
Otu00867	Bacteria	Bacteroidetes	Bacteroidia	Flavobacteriales	Flavobacteriaceae	Flavobacteriaceae_unclassified	3024	0	2	31	9	26	15	9	12	52	20	92	19	154	78	386	47	6	2	3	16	1	2	8	13	16	4	3	6	6	26	2	7	61	0	7	4	2	14	17	7	35	14
Otu00868	Bacteria	Acidobacteria	Subgroup_6	Subgroup_6_or	Subgroup_6_fa	Subgroup_6_ge	3281	57	62	74	91	69	37	30	137	230	164	61	24	26	18	9	3	5	24	20	23	4	77	64	44	37	7	6	3	2	2	4	0	0	47	34	85	63	28	1	0	0	2
Otu00869	Bacteria	Elusimicrobia	Elusimicrobia_unclassified	Elusimicrobia_unclassified	Elusimicrobia_unclassified	Elusimicrobia_unclassified	404	0	0	0	0	0	0	0	0	2	5	28	27	23	69	49	27	1	0	0	0	0	0	0	1	1	1	0	12	1	5	7	0	6	0	0	0	0	1	3	5	1	0
Otu00870	Bacteria	Acidobacteria	Acidobacteriia	Solibacterales	Solibacteraceae_(Subgroup_3)	Bryobacter	782	0	16	16	18	2	10	24	24	43	25	53	17	10	0	1	0	6	7	6	9	9	2	10	12	3	11	13	1	0	0	0	0	1	1	8	15	23	10	0	1	1	0
Otu00871	Bacteria	Actinobacteria	Actinobacteria	Pseudonocardiales	Pseudonocardiaceae	Actinophytocola	2270	160	701	306	59	35	42	0	2	32	0	2	0	6	0	0	0	1	55	87	41	3	0	3	13	1	0	0	1	0	0	0	0	1	11	11	1	0	1	0	1	0	0
Otu00872	Bacteria	Gemmatimonadetes	BD2-11_terrestrial_group	BD2-11_terrestrial_group_or	BD2-11_terrestrial_group_fa	BD2-11_terrestrial_group_ge	3221	0	0	2	1	206	687	86	38	71	44	133	166	74	43	52	28	25	1	0	110	10	4	15	6	9	97	11	35	14	55	12	0	4	0	1	1	1	12	15	18	1	3
Otu00873	Bacteria	Proteobacteria	Gammaproteobacteria	Acidiferrobacterales	Acidiferrobacteraceae	Sulfurifustis	2119	1	0	0	0	0	0	0	7	9	2	3	1	2	0	1	293	764	0	0	0	0	4	0	1	0	3	0	5	0	8	2	106	351	0	0	0	0	0	20	131	0	2
Otu00874	Bacteria	Chloroflexi	Gitt-GS-136	Gitt-GS-136_or	Gitt-GS-136_fa	Gitt-GS-136_ge	1520	1	30	43	43	24	34	128	26	110	40	42	4	4	0	4	0	7	0	12	32	32	27	28	1	21	10	3	5	4	3	3	0	5	0	12	30	20	7	2	1	2	1
Otu00875	Bacteria	Chloroflexi	Anaerolineae	SBR1031	A4b	A4b_ge	1130	44	115	150	33	10	15	14	14	30	5	6	13	4	3	4	3	2	32	67	11	3	5	4	10	1	2	0	0	1	0	0	0	0	32	28	6	5	0	2	1	1	0
Otu00876	Bacteria	Acidobacteria	Acidobacteriia	Subgroup_13	Subgroup_13_fa	Subgroup_13_ge	996	1	0	0	0	0	0	0	0	0	1	0	0	0	0	0	0	13	0	0	0	0	0	0	0	0	5	0	19	0	38	0	85	307	0	0	0	0	0	5	4	5	4
Otu00877	Bacteria	Bacteroidetes	Bacteroidia	Cytophagales	Microscillaceae	uncultured	1438	0	0	0	0	0	0	0	0	2	7	51	138	86	57	115	74	10	0	0	0	0	0	0	0	19	27	22	68	12	95	14	0	2	1	0	0	0	2	53	20	2	6
Otu00878	Bacteria	Armatimonadetes	Chthonomonadetes	Chthonomonadales	Chthonomonadales_fa	Chthonomonadales_ge	382	0	1	1	0	1	3	7	3	5	6	4	17	3	1	7	3	3	2	0	0	0	0	0	0	0	8	13	21	0	11	5	11	31	0	0	2	1	2	1	2	5	13
Otu00879	Bacteria	Acidobacteria	Thermoanaerobaculia	Thermoanaerobaculales	Thermoanaerobaculaceae	Subgroup_10	930	0	2	5	10	2	0	9	13	80	31	8	2	6	37	55	11	1	0	6	0	2	15	14	7	10	3	17	53	25	47	36	0	2	0	0	0	2	4	14	7	4	0
Otu00880	Bacteria	Bacteroidetes	Bacteroidia	Sphingobacteriales	Sphingobacteriaceae	Pedobacter	583	54	29	10	6	4	37	4	3	19	3	21	4	4	0	13	30	26	23	11	3	0	4	0	2	0	0	0	0	0	0	56	0	2	8	3	3	1	1	1	0	0	0
Otu00881	Bacteria	Proteobacteria	Alphaproteobacteria	Sphingomonadales	Sphingomonadaceae	Sphingomonadaceae_unclassified	1275	0	0	2	4	3	4	8	4	30	16	30	26	25	37	54	56	23	0	0	5	1	2	2	4	6	7	2	40	7	50	7	35	8	0	1	0	3	1	14	36	20	17
Otu00882	Bacteria	Actinobacteria	Actinobacteria	Micrococcales	Micrococcaceae	Kocuria	1636	213	73	69	5	4	17	0	3	9	3	24	2	2	0	5	0	4	103	50	8	0	6	2	14	0	0	1	0	0	0	10	0	2	79	10	5	0	0	1	1	0	0
Otu00883	Bacteria	Chloroflexi	Anaerolineae	SBR1031	A4b	A4b_ge	2682	0	0	0	0	0	0	0	0	2	3	1	0	1	0	1	1	61	0	0	0	0	0	0	0	0	2	0	10	0	13	0	1084	622	0	0	0	0	0	13	28	24	1
Otu00884	Bacteria	Chloroflexi	Anaerolineae	Anaerolineales	Anaerolineaceae	uncultured	1587	0	0	0	0	0	0	0	0	0	2	2	1	2	5	2	7	83	0	0	0	0	0	0	0	0	2	0	19	0	18	0	158	420	0	0	0	0	0	4	11	16	140
Otu00885	Bacteria	Proteobacteria	Alphaproteobacteria	uncultured	uncultured_fa	uncultured_ge	865	0	4	30	11	4	2	1	2	3	3	22	6	2	15	8	35	30	0	2	0	1	0	1	0	3	0	0	1	3	14	4	30	47	0	6	1	2	1	2	12	8	12
Otu00886	Bacteria	Planctomycetes	Planctomycetacia	Planctomycetales	uncultured	uncultured_ge	599	0	2	3	0	5	16	32	33	59	31	14	14	9	16	16	5	6	0	1	6	5	14	7	8	6	8	7	12	5	6	15	0	0	0	0	1	0	4	1	6	5	7
Otu00887	Bacteria	Chloroflexi	Anaerolineae	Anaerolineales	Anaerolineaceae	uncultured	937	0	0	0	0	0	0	0	0	0	1	0	0	0	1	3	2	59	0	0	0	0	0	0	0	0	2	0	15	0	25	0	106	293	0	0	0	0	0	3	5	18	69
Otu00888	Bacteria	Dadabacteria	Dadabacteriia	Dadabacteriales	Dadabacteriales_fa	Dadabacteriales_ge	3031	0	0	0	1	0	0	0	0	26	218	39	17	12	59	85	341	64	0	1	0	0	0	1	0	32	7	14	26	18	104	133	55	99	0	0	1	4	8	52	124	55	135
Otu00889	Bacteria	Proteobacteria	Alphaproteobacteria	Caulobacterales	Caulobacteraceae	Brevundimonas	1049	32	62	64	14	30	44	11	13	31	6	14	5	11	0	14	18	31	14	8	11	0	4	1	10	0	0	0	0	0	1	36	0	7	10	20	2	0	1	0	0	1	0
Otu00890	Bacteria	Proteobacteria	Deltaproteobacteria	Desulfobacterales	Desulfobacteraceae	Desulfobacteraceae_unclassified	954	0	6	1	1	71	27	21	20	24	2	1	7	0	5	1	21	8	0	11	41	10	21	8	19	1	2	0	2	4	15	2	9	7	0	34	23	6	6	11	16	21	17
Otu00891	Bacteria	Firmicutes	Negativicutes	Selenomonadales	Veillonellaceae	Sporomusa	310	0	3	0	0	1	0	1	1	2	27	34	19	11	12	9	0	0	3	0	2	0	5	1	2	10	15	8	0	0	3	1	3	15	0	0	1	2	1	1	0	0	0
Otu00892	Bacteria	Planctomycetes	Phycisphaerae	Phycisphaerales	Phycisphaeraceae	SM1A02	1712	0	41	50	30	129	87	78	46	29	24	67	33	14	0	5	0	1	3	15	83	12	11	10	14	11	31	3	1	0	0	0	0	0	0	17	13	5	2	0	1	0	1
Otu00893	Bacteria	Proteobacteria	Gammaproteobacteria	Betaproteobacteriales	Nitrosomonadaceae	Nitrosospira	1339	92	42	9	1	6	6	1	1	1	2	4	1	1	0	3	0	1	208	67	15	3	0	1	21	0	0	0	0	0	2	1	0	1	127	10	2	1	0	0	1	0	0
Otu00894	Bacteria	Planctomycetes	Planctomycetacia	Pirellulales	Pirellulaceae	Pir4_lineage	1054	1	0	2	1	1	3	42	73	155	83	8	2	1	28	15	11	1	0	0	0	4	65	71	30	9	0	11	16	6	7	6	0	0	0	2	0	3	5	1	4	3	1
Otu00895	Bacteria	Acidobacteria	Subgroup_6	Subgroup_6_or	Subgroup_6_fa	Subgroup_6_ge	137	0	1	7	1	0	1	1	5	2	13	6	4	3	9	2	2	1	0	0	1	0	1	1	0	0	1	0	7	0	1	0	0	0	0	0	1	0	1	1	0	2	1
Otu00896	Bacteria	Proteobacteria	Alphaproteobacteria	Rhizobiales	KF-JG30-B3	KF-JG30-B3_ge	1302	0	1	9	12	38	33	21	1	2	15	73	118	58	24	21	1	26	0	0	17	13	4	3	4	11	93	13	32	3	10	0	0	6	1	2	6	6	13	5	1	0	6
Otu00897	Bacteria	Proteobacteria	Alphaproteobacteria	Rhizobiales	Methyloligellaceae	Methyloceanibacter	1022	0	1	6	3	3	8	10	32	129	51	48	88	21	30	17	16	12	0	1	3	2	4	6	15	4	2	1	13	17	15	3	13	19	0	1	6	0	5	17	21	3	2
Otu00898	Bacteria	Proteobacteria	Alphaproteobacteria	Rhizobiales	Rhizobiales_Incertae_Sedis	uncultured	1421	67	203	58	12	2	15	1	3	17	21	12	4	6	2	4	8	15	16	12	2	0	7	4	1	3	4	2	19	2	25	2	11	46	34	4	2	2	7	3	8	10	9
Otu00899	Bacteria	Proteobacteria	Deltaproteobacteria	MBNT15	MBNT15_fa	MBNT15_ge	763	1	13	14	14	36	16	16	21	41	22	25	26	13	18	10	26	0	2	6	11	1	3	11	6	2	28	4	12	1	23	2	1	2	0	3	4	1	2	3	1	2	8
Otu00900	Bacteria	Planctomycetes	OM190	OM190_or	OM190_fa	OM190_ge	1503	0	0	0	0	0	0	1	0	3	4	199	177	121	14	104	125	7	0	0	0	0	0	0	0	5	32	7	24	1	42	0	1	3	0	0	0	0	4	19	20	2	6
Otu00901	Bacteria	Planctomycetes	Planctomycetacia	Pirellulales	Pirellulaceae	Pirellula	1425	5	24	19	11	12	12	29	47	112	75	22	17	8	7	14	8	3	4	28	13	10	30	49	23	10	7	9	1	1	0	1	1	0	22	20	16	24	11	2	1	2	7
Otu00902	Bacteria	Planctomycetes	Pla4_lineage	Pla4_lineage_or	Pla4_lineage_fa	Pla4_lineage_ge	657	0	0	1	0	1	1	8	6	16	24	9	21	5	15	11	40	9	0	0	8	0	5	4	1	7	6	3	18	5	17	12	10	16	0	1	3	3	4	7	8	48	1
Otu00903	Bacteria	Acidobacteria	Subgroup_17	Subgroup_17_or	Subgroup_17_fa	Subgroup_17_ge	1163	91	128	31	15	2	9	1	65	60	10	6	0	3	1	8	4	4	17	15	5	2	26	26	21	3	0	2	3	0	0	6	0	1	68	29	2	25	1	0	2	1	0
Otu00904	Bacteria	Proteobacteria	Alphaproteobacteria	Rhizobiales	Xanthobacteraceae	Pseudolabrys	1635	277	134	46	3	3	22	0	1	31	3	19	2	5	0	2	1	2	108	26	2	2	6	1	4	0	3	0	0	0	0	2	1	3	224	15	1	2	0	0	1	0	0
Otu00905	Bacteria	Proteobacteria	Alphaproteobacteria	Rhizobiales	Xanthobacteraceae	Pseudolabrys	140	0	2	0	0	4	3	5	3	3	0	0	1	2	7	1	5	1	2	0	1	2	0	2	1	0	0	0	1	1	4	0	4	0	0	1	2	0	0	0	2	1	2
Otu00906	Archaea	Euryarchaeota	Thermoplasmata	Methanomassiliicoccales	uncultured	uncultured_ge	2124	0	0	0	0	0	0	0	0	0	0	0	0	0	0	2	8	13	0	0	0	0	0	0	0	0	13	0	87	0	181	0	47	15	0	0	0	0	0	25	16	3	169
Otu00907	Bacteria	Bacteroidetes	Bacteroidia	Cytophagales	Microscillaceae	uncultured	132	0	0	0	3	3	4	0	0	2	5	22	15	3	6	0	0	1	0	0	1	0	1	1	1	2	9	0	0	0	0	0	0	0	0	1	1	1	0	3	1	0	3
Otu00908	Bacteria	Proteobacteria	Alphaproteobacteria	Sphingomonadales	Sphingomonadaceae	Altererythrobacter	950	199	113	46	2	4	28	0	1	20	2	35	2	2	0	2	6	3	37	14	3	4	3	1	1	0	0	0	0	0	0	2	0	2	43	7	0	0	0	1	3	1	1
Otu00909	Bacteria	Chloroflexi	SHA-26	SHA-26_or	SHA-26_fa	SHA-26_ge	687	0	4	4	2	0	2	7	17	45	12	6	4	8	3	10	1	7	3	8	3	4	34	20	10	3	9	10	19	0	5	0	19	24	7	11	3	9	11	1	3	4	3
Otu00910	Bacteria	Bacteroidetes	Ignavibacteria	Ignavibacteriales	PHOS-HE36	PHOS-HE36_ge	1096	0	0	0	0	2	0	0	0	1	1	0	1	1	0	1	0	11	0	0	0	0	1	0	0	0	1	0	5	0	1	0	303	123	0	0	0	1	1	6	5	12	7
Otu00911	Bacteria	Actinobacteria	Thermoleophilia	Solirubrobacterales	67-14	67-14_ge	621	2	17	22	10	54	15	15	18	20	17	5	18	5	4	8	0	4	3	7	14	2	8	6	14	3	10	7	12	3	5	0	0	2	2	2	16	2	5	0	1	3	2
Otu00912	Bacteria	Actinobacteria	Thermoleophilia	Solirubrobacterales	Solirubrobacteraceae	Solirubrobacter	276	27	16	6	0	0	3	3	0	7	0	6	0	2	0	2	0	1	12	9	0	0	5	2	1	0	0	0	0	1	1	0	0	0	6	6	0	1	0	1	0	0	0
Otu00913	Bacteria	Proteobacteria	Alphaproteobacteria	Rhodobacterales	Rhodobacteraceae	Rhodobacteraceae_unclassified	864	1	73	78	17	6	12	5	3	28	4	5	145	2	16	5	24	4	7	14	7	4	2	9	3	1	0	0	2	1	10	0	1	9	0	9	5	1	3	3	2	8	12
Otu00914	Bacteria	Acidobacteria	Subgroup_6	Subgroup_6_unclassified	Subgroup_6_unclassified	Subgroup_6_unclassified	1029	38	99	43	27	0	6	9	15	11	1	17	8	4	0	1	1	3	35	32	7	6	15	6	6	2	7	4	3	0	1	0	0	0	45	55	1	6	4	0	1	1	1
Otu00915	Bacteria	Proteobacteria	Deltaproteobacteria	Syntrophobacterales	Syntrophobacteraceae	Desulfovirga	1207	0	2	0	0	0	1	0	4	4	1	0	5	1	5	1	10	47	0	3	0	0	1	0	0	0	1	0	2	0	5	0	180	68	0	3	2	3	0	8	14	81	9
Otu00916	Bacteria	Proteobacteria	Alphaproteobacteria	Rhizobiales	Rhizobiales_Incertae_Sedis	Bauldia	564	0	0	0	0	0	1	4	1	31	27	4	6	5	18	24	30	7	0	0	2	0	2	4	2	3	1	2	35	16	33	4	12	13	0	0	0	4	1	7	12	25	20
Otu00917	Bacteria	Fibrobacteres	Fibrobacteria	Fibrobacterales	Fibrobacteraceae	possible_genus_04	556	25	17	15	8	59	41	24	31	8	4	15	1	3	3	2	7	1	7	2	16	3	12	3	4	1	5	0	2	2	0	0	5	2	11	11	3	3	0	2	0	0	0
Otu00918	Bacteria	Chloroflexi	KD4-96	KD4-96_or	KD4-96_fa	KD4-96_ge	915	5	17	10	5	3	5	33	50	51	19	6	2	1	18	16	23	10	11	10	7	6	16	16	10	1	0	1	19	12	12	3	2	4	11	8	2	3	3	0	1	18	2
Otu00919	Bacteria	Actinobacteria	Thermoleophilia	Gaiellales	uncultured	uncultured_ge	446	1	5	6	4	9	7	11	15	13	15	6	11	6	12	3	1	1	0	3	6	4	7	10	5	2	4	2	6	5	6	1	10	14	0	2	8	7	2	1	0	3	11
Otu00920	Bacteria	Actinobacteria	Acidimicrobiia	IMCC26256	IMCC26256_fa	IMCC26256_ge	773	9	12	8	4	4	6	19	41	29	18	26	26	5	30	24	41	7	1	3	10	7	9	7	10	4	3	0	8	6	16	4	10	30	5	1	8	5	1	5	17	6	9
Otu00921	Bacteria	Chloroflexi	Anaerolineae	Anaerolineales	Anaerolineaceae	uncultured	929	1	0	6	5	1	1	77	102	105	40	6	0	4	2	5	1	8	0	3	1	19	51	27	18	4	0	5	10	1	5	0	2	0	0	4	5	3	10	1	4	3	1
Otu00922	Bacteria	Firmicutes	Clostridia	Clostridiales	Gracilibacteraceae	Gracilibacter	561	0	1	3	0	19	23	19	4	13	6	13	20	12	3	1	0	3	2	4	19	4	6	3	4	1	20	3	1	1	0	4	2	8	29	12	12	6	2	3	3	0	1
Otu00923	Archaea	Thaumarchaeota	Nitrososphaeria	Nitrososphaerales	Nitrososphaeraceae	Nitrososphaeraceae_ge	1411	18	72	61	79	8	7	13	39	61	22	7	1	4	2	5	2	3	23	24	11	2	13	13	3	5	5	5	2	1	2	0	5	5	3	69	2	8	1	3	3	4	3
Otu00924	Bacteria	Bacteroidetes	Ignavibacteria	Ignavibacteriales	Ignavibacteriales_unclassified	Ignavibacteriales_unclassified	1116	0	0	0	0	0	0	0	0	0	5	5	5	6	28	20	58	14	0	0	0	0	0	0	0	0	29	16	56	3	11	2	8	14	0	0	0	0	3	7	25	264	19
Otu00925	Bacteria	Planctomycetes	Planctomycetacia	Planctomycetales	uncultured	uncultured_ge	910	6	19	36	14	2	2	5	2	27	33	42	17	15	22	20	22	3	2	21	2	7	11	9	6	3	22	40	11	4	1	1	0	2	0	9	7	11	9	1	2	1	1
Otu00926	Bacteria	Planctomycetes	Planctomycetacia	Planctomycetales	uncultured	uncultured_ge	1716	0	0	0	1	0	0	0	3	25	28	58	50	105	26	63	3	14	0	0	0	0	2	15	6	38	49	118	177	16	25	1	1	8	0	0	0	4	53	21	13	6	4
Otu00927	Bacteria	Proteobacteria	Deltaproteobacteria	Myxococcales	BIrii41	BIrii41_ge	807	0	0	0	0	7	5	6	5	16	8	26	415	19	30	15	3	3	0	0	7	1	2	1	0	3	4	0	5	1	3	1	1	0	0	0	2	0	1	5	1	1	1
Otu00928	Bacteria	Bacteroidetes	Bacteroidia	Chitinophagales	Chitinophagaceae	Ferruginibacter	644	152	29	8	1	0	15	1	0	13	7	44	0	6	0	2	1	6	34	9	3	5	0	0	3	0	0	0	0	0	0	0	0	1	46	12	2	0	1	1	3	2	3
Otu00929	Bacteria	Proteobacteria	Alphaproteobacteria	Sphingomonadales	Sphingomonadaceae	Sphingorhabdus	1590	0	0	0	0	0	3	7	22	42	24	54	32	50	41	135	76	27	0	0	0	0	0	4	0	5	6	0	27	6	66	2	22	11	0	0	0	0	1	10	56	7	5
Otu00930	Bacteria	Chloroflexi	KD4-96	KD4-96_or	KD4-96_fa	KD4-96_ge	662	0	1	12	8	4	4	14	26	23	36	6	7	10	7	5	3	5	0	12	10	2	17	12	10	6	8	7	20	12	5	1	1	8	4	3	6	6	10	5	2	1	0
Otu00931	Bacteria	Gemmatimonadetes	Gemmatimonadetes	Gemmatimonadales	Gemmatimonadaceae	uncultured	1412	44	81	53	18	7	10	56	50	20	5	20	11	11	0	3	1	5	47	60	9	8	12	6	9	3	8	0	0	0	1	1	0	0	72	96	2	23	8	1	2	0	0
Otu00932	Bacteria	Actinobacteria	Acidimicrobiia	Actinomarinales	uncultured	uncultured_ge	764	0	0	0	0	0	0	0	9	131	64	21	0	8	14	13	3	2	0	0	0	0	4	18	6	8	22	9	84	11	5	0	0	2	0	0	0	3	9	12	4	8	3
Otu00933	Bacteria	Proteobacteria	Alphaproteobacteria	Sphingomonadales	Sphingomonadaceae	Sphingomonadaceae_unclassified	780	12	1	13	35	8	10	2	8	29	14	10	2	2	9	6	13	15	5	6	5	1	2	2	1	1	3	0	6	3	10	1	9	51	5	3	0	2	3	9	47	11	1
Otu00934	Bacteria	Chloroflexi	Anaerolineae	Anaerolineae_unclassified	Anaerolineae_unclassified	Anaerolineae_unclassified	136	0	0	0	0	0	0	0	0	0	3	2	3	7	6	8	16	0	0	0	0	0	0	0	0	0	1	1	7	1	3	1	0	0	0	0	0	0	0	4	5	0	5
Otu00935	Bacteria	Proteobacteria	Deltaproteobacteria	Desulfuromonadales	Desulfuromonadaceae	Desulfuromonadaceae_unclassified	203	0	0	0	0	0	0	1	0	3	1	5	1	4	8	9	5	2	0	0	1	0	0	0	0	3	8	0	3	0	1	0	6	1	0	0	0	1	0	13	10	2	0
Otu00936	Bacteria	Bacteroidetes	Bacteroidia	Cytophagales	MWH-CFBk5	MWH-CFBk5_ge	1076	4	11	17	18	21	60	48	12	23	31	58	28	34	12	20	15	5	4	1	13	4	2	0	5	4	7	2	5	1	8	4	0	3	1	2	0	3	13	8	5	19	4
Otu00937	Bacteria	Acidobacteria	Holophagae	Subgroup_7	Subgroup_7_fa	Subgroup_7_ge	1473	0	14	39	35	13	20	121	85	79	40	11	5	11	25	14	27	11	0	4	6	28	22	26	15	8	0	8	43	9	50	17	1	3	0	13	0	15	8	7	6	3	2
Otu00938	Bacteria	Acidobacteria	Blastocatellia_(Subgroup_4)	Pyrinomonadales	Pyrinomonadaceae	RB41	1609	11	63	70	33	5	6	10	41	17	39	1	0	3	0	1	1	5	11	86	5	6	12	6	7	6	0	1	0	0	0	0	0	1	187	79	5	27	6	0	3	1	9
Otu00939	Bacteria	Chloroflexi	Anaerolineae	Ardenticatenales	uncultured	uncultured_ge	712	0	0	0	0	0	0	0	4	7	3	6	2	11	23	18	44	25	0	0	0	0	0	0	0	0	6	1	29	4	25	4	3	5	0	0	0	0	2	6	52	41	6
Otu00940	Bacteria	Firmicutes	Negativicutes	Selenomonadales	uncultured	uncultured_ge	2477	0	8	2	0	12	18	22	25	42	21	30	114	68	47	43	5	54	5	9	8	4	10	5	10	7	130	69	24	11	44	23	46	119	5	59	10	4	9	15	13	44	38
Otu00941	Bacteria	Acidobacteria	Acidobacteriia	Solibacterales	Solibacteraceae_(Subgroup_3)	PAUC26f	1148	0	0	0	0	0	2	19	19	32	50	73	15	22	35	41	31	16	0	0	0	1	6	19	3	17	22	20	47	11	40	14	9	9	0	0	1	6	6	19	9	10	3
Otu00942	Bacteria	Bacteroidetes	Bacteroidia	Cytophagales	Cyclobacteriaceae	Cyclobacteriaceae_unclassified	1457	15	55	64	20	113	79	63	13	37	8	31	33	10	10	14	47	3	13	17	31	9	8	8	16	1	8	1	4	0	13	5	0	0	26	3	1	0	0	2	7	0	9
Otu00943	Bacteria	Gemmatimonadetes	Gemmatimonadetes	Gemmatimonadales	Gemmatimonadaceae	uncultured	932	103	131	71	10	2	8	0	4	10	4	21	0	6	0	1	0	1	33	35	4	0	2	3	5	0	0	0	0	0	0	4	0	0	103	12	1	0	0	0	1	2	1
Otu00944	Bacteria	Acidobacteria	Acidobacteriia	Solibacterales	Solibacteraceae_(Subgroup_3)	PAUC26f	983	0	0	5	15	3	8	12	18	23	31	31	30	10	10	28	13	9	0	1	2	6	8	7	8	7	20	12	25	3	14	8	1	3	0	13	4	13	20	8	25	18	16
Otu00945	Bacteria	Proteobacteria	Alphaproteobacteria	Rhizobiales	Rhizobiales_unclassified	Rhizobiales_unclassified	537	17	10	17	10	7	9	8	3	9	6	14	15	6	15	7	14	3	11	11	8	4	3	8	4	1	3	0	6	5	19	3	3	4	8	3	5	5	5	5	9	2	5
Otu00946	Bacteria	Chloroflexi	Chloroflexia	Thermomicrobiales	JG30-KF-CM45	JG30-KF-CM45_ge	957	23	42	25	15	33	12	8	5	11	10	19	51	25	1	2	0	7	49	25	42	5	7	7	3	0	28	11	3	2	1	0	0	1	7	11	20	0	3	1	1	0	1
Otu00947	Bacteria	Omnitrophicaeota	Omnitrophicaeota_cl	Omnitrophicaeota_or	Omnitrophicaeota_fa	Omnitrophicaeota_ge	437	0	0	0	0	0	0	10	4	21	6	27	40	15	15	18	26	6	0	0	0	0	2	2	0	3	15	2	28	0	2	1	1	4	0	0	0	0	2	2	6	1	0
Otu00948	Bacteria	Proteobacteria	Gammaproteobacteria	JTB23	JTB23_fa	JTB23_ge	1495	0	0	0	0	0	0	0	0	2	1	0	0	1	20	49	426	218	0	0	0	0	0	0	0	0	1	5	34	11	109	32	65	105	0	0	0	0	0	13	44	55	3
Otu00949	Bacteria	Planctomycetes	Planctomycetacia	Pirellulales	Pirellulaceae	Pir4_lineage	159	1	3	1	2	3	3	3	2	13	3	2	0	4	1	1	1	0	2	8	1	1	15	2	2	0	0	1	0	2	1	1	0	0	1	2	0	2	0	0	0	1	2
Otu00950	Bacteria	Bacteroidetes	Bacteroidia	Chitinophagales	Chitinophagaceae	Segetibacter	342	62	5	4	3	0	13	1	1	16	6	20	1	4	0	5	26	15	12	5	1	0	0	0	0	0	0	0	0	0	0	15	0	0	17	5	0	1	0	1	1	1	1
Otu00951	Bacteria	Fibrobacteres	Chitinivibrionia	uncultured	uncultured_fa	uncultured_ge	727	0	0	2	1	4	1	7	39	84	19	1	6	3	0	0	1	7	1	1	1	4	17	16	6	5	3	1	0	0	0	0	7	8	0	1	2	4	4	0	0	39	7
Otu00952	Bacteria	Chloroflexi	Anaerolineae	Caldilineales	Caldilineaceae	uncultured	811	0	0	2	1	0	1	13	18	45	20	5	3	2	4	21	11	24	0	0	0	4	17	10	6	2	4	4	23	11	15	2	44	86	0	0	1	7	3	2	2	21	11
Otu00953	Bacteria	Proteobacteria	Alphaproteobacteria	uncultured	uncultured_fa	uncultured_ge	2003	0	0	0	0	0	0	0	21	76	88	112	262	195	39	61	32	22	0	0	0	0	1	5	6	10	125	18	54	7	3	2	1	2	0	0	0	1	14	7	3	3	3
Otu00954	Bacteria	Actinobacteria	Acidimicrobiia	Microtrichales	Microtrichaceae	uncultured	1146	20	7	10	3	18	15	22	29	20	86	74	88	20	82	12	2	0	1	2	1	5	15	2	5	13	37	3	4	2	7	1	0	0	15	3	13	17	14	2	7	1	31
Otu00955	Bacteria	Proteobacteria	Deltaproteobacteria	NB1-j	NB1-j_fa	NB1-j_ge	1602	0	4	2	1	121	102	19	32	20	20	55	61	23	4	15	1	10	1	1	61	14	4	3	7	5	74	1	5	2	8	1	6	9	2	0	37	7	2	3	3	3	1
Otu00956	Bacteria	Gemmatimonadetes	Longimicrobia	Longimicrobiales	Longimicrobiaceae	Longimicrobiaceae_ge	1192	39	54	95	25	50	38	28	17	45	26	3	6	12	1	2	2	4	33	35	17	12	10	23	7	2	4	0	5	0	2	0	0	2	37	13	9	17	20	1	4	1	0
Otu00957	Bacteria	Planctomycetes	Planctomycetacia	Planctomycetales	Rubinisphaeraceae	Planctomicrobium	1223	0	7	11	4	47	51	45	63	72	63	19	20	8	8	15	2	3	2	17	65	26	34	21	24	10	12	17	8	1	6	1	1	1	3	1	14	4	10	2	1	0	3
Otu00958	Bacteria	Proteobacteria	Alphaproteobacteria	Alphaproteobacteria_unclassified	Alphaproteobacteria_unclassified	Alphaproteobacteria_unclassified	685	2	13	4	4	16	13	26	17	26	25	23	21	11	2	15	24	10	1	4	8	13	7	2	6	2	8	2	1	0	5	1	9	5	0	12	6	19	10	3	2	1	3
Otu00959	Bacteria	Planctomycetes	Phycisphaerae	Phycisphaerales	Phycisphaeraceae	SM1A02	2441	0	0	0	1	4	1	4	13	118	652	141	59	36	15	36	40	5	0	0	0	2	2	24	21	122	127	3	28	2	2	1	1	1	0	0	0	13	21	31	6	4	15
Otu00960	Bacteria	Chloroflexi	Anaerolineae	Anaerolineales	Anaerolineaceae	uncultured	1656	0	0	12	4	0	0	5	4	33	20	5	1	4	9	56	57	46	0	2	0	1	5	4	6	1	6	1	9	4	47	4	115	141	0	7	1	4	4	13	20	56	21
Otu00961	Bacteria	Proteobacteria	Gammaproteobacteria	Steroidobacterales	Woeseiaceae	Woeseia	863	0	0	0	0	0	0	0	1	64	34	18	31	27	142	20	62	0	0	0	0	0	0	0	0	7	7	2	47	18	22	4	0	0	0	0	0	0	2	11	9	2	7
Otu00962	Bacteria	Proteobacteria	Deltaproteobacteria	Sva0485	Sva0485_fa	Sva0485_ge	1030	0	0	0	0	0	0	0	0	2	0	0	0	0	0	3	2	2	0	0	0	0	0	0	0	0	2	0	32	0	60	0	11	143	0	0	0	0	0	11	7	4	83
Otu00963	Bacteria	Verrucomicrobia	Verrucomicrobiae	Pedosphaerales	Pedosphaeraceae	Pedosphaeraceae_unclassified	555	0	5	13	5	22	5	23	2	8	10	8	18	5	0	1	1	7	1	11	8	10	4	4	4	1	28	0	5	0	5	0	0	4	6	12	5	12	1	3	2	4	1
Otu00964	Bacteria	Chloroflexi	Anaerolineae	SBR1031	A4b	A4b_ge	613	0	1	8	0	0	0	0	1	4	8	11	16	20	1	8	4	26	0	4	0	0	0	0	0	1	5	3	2	1	6	7	33	30	0	1	0	3	0	3	3	38	1
Otu00965	Bacteria	Verrucomicrobia	Verrucomicrobiae	Pedosphaerales	Pedosphaeraceae	Pedosphaeraceae_ge	629	1	9	15	14	1	7	28	28	44	34	9	9	1	5	8	2	1	1	9	3	9	16	11	4	7	1	0	2	0	0	0	0	0	6	18	0	18	8	2	2	1	0
Otu00966	Bacteria	Proteobacteria	Alphaproteobacteria	Rhizobiales	uncultured	uncultured_ge	843	8	55	15	8	1	0	2	15	21	30	27	28	18	12	10	1	9	12	15	1	0	7	8	3	3	26	2	20	1	2	0	2	0	8	28	0	4	2	7	4	2	5
Otu00967	Bacteria	Proteobacteria	Alphaproteobacteria	Rhizobiales	Devosiaceae	uncultured	803	239	115	11	3	0	15	0	1	2	1	2	0	1	8	0	18	0	54	12	7	1	7	0	1	1	0	0	0	0	0	6	0	0	58	11	0	0	0	0	0	0	0
Otu00968	Bacteria	Proteobacteria	Alphaproteobacteria	Alphaproteobacteria_unclassified	Alphaproteobacteria_unclassified	Alphaproteobacteria_unclassified	117	0	0	0	0	0	4	1	1	4	0	3	2	5	4	10	4	4	0	0	0	0	0	0	0	0	3	0	2	1	9	0	2	1	0	0	1	1	0	4	3	3	1
Otu00969	Bacteria	Planctomycetes	OM190	OM190_or	OM190_fa	OM190_ge	1308	0	0	0	0	0	0	0	0	34	39	56	41	82	70	102	103	9	0	0	0	1	0	2	2	3	14	35	42	39	68	25	0	1	0	0	0	0	3	43	10	0	3
Otu00970	Bacteria	Actinobacteria	Actinobacteria	Corynebacteriales	Mycobacteriaceae	Mycobacterium	528	49	16	12	1	0	3	3	6	10	10	7	4	8	9	12	0	1	40	19	3	0	2	0	6	2	0	1	4	1	9	3	1	0	9	5	1	2	2	8	11	3	7
Otu00971	Bacteria	Actinobacteria	Acidimicrobiia	IMCC26256	IMCC26256_fa	IMCC26256_ge	1590	5	15	13	13	14	18	19	88	202	94	69	25	20	27	27	19	6	6	19	10	8	55	60	43	18	11	1	15	10	17	3	0	9	8	14	7	11	9	1	4	3	3
Otu00972	Bacteria	Proteobacteria	Deltaproteobacteria	Myxococcales	BIrii41	BIrii41_ge	1124	0	2	0	0	4	8	6	16	16	55	24	23	22	46	51	262	11	1	0	2	1	4	5	8	6	14	0	11	9	24	13	0	2	0	0	5	5	8	15	27	1	31
Otu00973	Bacteria	Proteobacteria	Gammaproteobacteria	Xanthomonadales	Xanthomonadaceae	Xanthomonadaceae_unclassified	872	17	153	96	17	6	12	1	5	9	7	16	6	8	0	1	8	2	8	13	3	4	6	2	5	5	2	0	0	0	1	1	0	0	11	11	8	4	8	1	3	1	2
Otu00974	Bacteria	Gemmatimonadetes	Gemmatimonadetes	Gemmatimonadales	Gemmatimonadaceae	uncultured	2364	0	0	0	0	0	0	0	0	17	49	101	66	68	212	188	143	11	0	0	0	0	0	0	1	22	39	23	115	42	75	12	1	7	0	0	0	0	14	46	51	7	192
Otu00975	Bacteria	Acidobacteria	Subgroup_9	Subgroup_9_or	Subgroup_9_fa	Subgroup_9_ge	1247	0	0	0	0	0	0	23	5	44	109	8	4	5	37	57	21	9	1	0	0	1	0	5	5	12	1	28	114	68	27	3	0	1	0	1	0	1	0	36	27	10	19
Otu00976	Bacteria	Planctomycetes	Planctomycetacia	Pirellulales	Pirellulaceae	Blastopirellula	856	0	2	9	9	49	58	24	16	28	17	33	47	8	19	0	2	1	0	5	43	6	16	9	10	9	8	1	0	0	7	2	0	0	0	1	15	4	2	6	6	1	14
Otu00977	Bacteria	Firmicutes	Bacilli	Bacillales	Paenibacillaceae	Paenibacillus	395	0	0	0	0	0	0	4	33	32	8	3	9	5	24	13	4	5	0	0	0	0	12	8	3	10	1	8	1	6	3	0	10	12	0	2	1	0	4	2	1	8	0
Otu00978	Archaea	Euryarchaeota	Thermoplasmata	uncultured	uncultured_fa	uncultured_ge	1371	0	0	1	1	3	3	85	125	99	202	41	5	18	65	13	4	7	0	1	0	6	12	1	10	17	1	12	46	16	10	1	0	1	0	2	1	15	46	3	1	5	8
Otu00979	Bacteria	Chloroflexi	P2-11E	P2-11E_or	P2-11E_fa	P2-11E_ge	1333	0	8	9	6	2	0	8	47	100	38	11	22	29	10	21	4	42	0	1	1	2	4	29	8	9	6	17	50	3	15	2	3	9	0	25	2	26	6	4	4	31	2
Otu00980	Bacteria	Planctomycetes	Planctomycetacia	Gemmatales	Gemmataceae	uncultured	641	22	36	21	12	3	5	12	16	12	9	9	1	4	1	2	0	2	16	25	9	4	16	4	6	0	3	0	1	0	0	0	0	4	6	7	14	7	5	0	0	0	0
Otu00981	Bacteria	Proteobacteria	Gammaproteobacteria	JG36-GS-52	JG36-GS-52_fa	JG36-GS-52_ge	405	0	0	3	0	0	0	8	12	16	14	18	13	17	9	7	0	2	0	1	0	1	2	6	4	1	19	5	9	1	3	0	1	5	0	0	0	0	3	2	1	5	3
Otu00982	Bacteria	Chloroflexi	Anaerolineae	Anaerolineales	Anaerolineaceae	Anaerolinea	2240	11	227	156	114	23	26	1	29	52	1	23	1	4	0	1	0	2	204	77	26	4	3	6	9	1	0	0	1	0	1	1	0	0	36	128	1	0	0	0	1	2	0
Otu00983	Bacteria	Bacteroidetes	Rhodothermia	Rhodothermales	Rhodothermaceae	uncultured	902	0	0	0	0	0	0	8	4	32	74	31	18	29	36	33	70	14	0	0	0	0	0	4	3	7	22	10	31	14	45	6	2	0	0	0	0	0	3	14	23	14	7
Otu00984	Bacteria	Bacteroidetes	Bacteroidia	Cytophagales	Microscillaceae	uncultured	2367	0	0	0	0	0	0	0	0	9	37	57	75	115	121	233	178	24	0	0	0	0	0	0	1	19	76	42	151	8	53	31	1	7	0	0	0	0	11	26	22	1	5
Otu00985	Bacteria	Planctomycetes	Planctomycetacia	Planctomycetales	Rubinisphaeraceae	SH-PL14	797	0	0	0	3	6	3	20	32	62	49	16	20	13	24	28	5	6	0	0	7	13	17	12	5	15	20	14	15	11	11	3	1	1	0	2	4	1	7	13	15	3	25
Otu00986	Bacteria	Acidobacteria	Subgroup_6	Subgroup_6_unclassified	Subgroup_6_unclassified	Subgroup_6_unclassified	606	0	5	19	17	2	14	30	42	10	5	5	1	3	0	0	0	2	0	10	17	7	27	0	24	3	1	0	2	0	0	0	0	0	1	13	16	25	1	0	1	1	0
Otu00987	Bacteria	Proteobacteria	Gammaproteobacteria	Steroidobacterales	Woeseiaceae	Woeseia	293	0	1	2	2	1	2	34	6	9	6	18	5	2	2	1	1	0	0	1	2	2	1	2	1	2	9	0	0	1	1	1	0	0	0	2	6	4	24	1	4	1	4
Otu00988	Bacteria	Actinobacteria	Actinobacteria	Micromonosporales	Micromonosporaceae	Micromonosporaceae_unclassified	1543	0	30	340	187	121	56	0	2	6	2	4	1	0	0	0	1	0	0	19	23	1	1	0	0	0	0	0	0	0	0	0	0	0	1	77	8	0	1	0	0	0	0
Otu00989	Bacteria	Bacteria_unclassified	Bacteria_unclassified	Bacteria_unclassified	Bacteria_unclassified	Bacteria_unclassified	1286	0	0	1	0	0	1	2	52	45	32	16	19	25	12	27	1	14	0	1	0	0	22	38	15	22	6	33	14	5	3	1	1	3	0	5	0	27	17	2	0	4	28
Otu00990	Bacteria	Chloroflexi	Anaerolineae	Anaerolineales	Anaerolineaceae	uncultured	1817	0	0	0	0	0	0	4	2	67	66	135	86	99	63	47	35	13	0	0	0	0	0	7	4	18	47	20	89	2	21	1	1	4	0	0	0	1	107	20	11	17	10
Otu00991	Bacteria	Actinobacteria	Thermoleophilia	Gaiellales	Gaiellales_unclassified	Gaiellales_unclassified	461	0	2	1	2	0	0	7	32	68	17	0	5	5	8	8	2	0	0	2	1	4	15	27	11	1	6	7	17	4	2	1	0	0	0	6	5	11	5	0	0	2	0
Otu00992	Bacteria	Gemmatimonadetes	BD2-11_terrestrial_group	BD2-11_terrestrial_group_or	BD2-11_terrestrial_group_fa	BD2-11_terrestrial_group_ge	1107	1	0	0	0	1	1	30	11	26	58	34	30	28	82	44	106	12	0	0	0	2	3	4	5	10	23	2	38	11	37	5	0	1	0	1	1	6	4	17	18	9	27
Otu00993	Bacteria	Actinobacteria	Actinobacteria	Micrococcales	Microbacteriaceae	Microbacterium	501	44	19	7	3	1	10	1	35	13	9	12	9	1	4	6	1	1	14	5	4	0	3	5	7	1	1	0	0	1	0	3	1	1	5	4	1	0	3	2	2	2	2
Otu00994	Bacteria	Acidobacteria	Subgroup_6	Subgroup_6_or	Subgroup_6_fa	Subgroup_6_ge	941	0	17	21	30	1	3	10	11	26	13	45	72	16	1	1	3	8	1	8	14	7	9	8	7	9	64	1	1	0	0	1	0	0	1	13	7	17	1	2	1	3	1
Otu00995	Bacteria	Proteobacteria	Alphaproteobacteria	Rhizobiales	Hyphomicrobiaceae	Pedomicrobium	1487	158	130	28	5	18	23	6	19	30	7	12	8	6	1	1	0	8	116	50	13	5	14	4	15	1	3	3	3	0	0	5	0	5	103	13	7	0	1	0	0	1	0
Otu00996	Bacteria	Firmicutes	Bacilli	Bacillales	Bacillaceae	Bacillus	627	0	4	16	4	13	8	5	18	31	14	8	40	36	5	10	0	13	1	2	2	1	10	7	2	3	6	32	1	3	2	2	0	5	8	4	6	5	12	3	4	2	1
Otu00997	Bacteria	Verrucomicrobia	Verrucomicrobiae	Chthoniobacterales	Chthoniobacteraceae	Chthoniobacter	417	58	29	17	3	0	8	0	0	11	3	11	2	0	0	0	6	3	28	16	1	1	3	0	3	0	0	0	0	0	1	0	0	0	31	6	0	2	0	0	2	0	0
Otu00998	Bacteria	Planctomycetes	Phycisphaerae	Tepidisphaerales	WD2101_soil_group	WD2101_soil_group_ge	1747	20	37	14	6	45	17	12	10	13	13	98	113	64	4	6	1	23	20	11	20	6	8	1	5	17	172	28	7	1	0	1	0	0	62	15	25	11	18	1	1	1	1
Otu00999	Bacteria	Acidobacteria	Thermoanaerobaculia	Thermoanaerobaculales	Thermoanaerobaculaceae	Subgroup_10	941	0	7	12	17	8	8	40	38	51	22	25	31	9	15	6	14	3	0	2	10	10	22	11	15	8	10	1	4	7	10	15	1	3	0	9	20	19	7	5	12	7	4
Otu01000	Bacteria	Actinobacteria	MB-A2-108	MB-A2-108_or	MB-A2-108_fa	MB-A2-108_ge	981	0	5	5	7	0	0	3	86	168	30	4	2	4	6	12	3	1	0	3	0	1	61	75	34	1	2	11	31	11	4	1	15	5	0	5	0	14	6	6	2	4	2
Otu01001	Bacteria	Planctomycetes	Planctomycetacia	Planctomycetales	Rubinisphaeraceae	Planctomicrobium	935	0	6	14	14	14	28	54	20	47	25	13	34	10	16	14	8	6	0	7	26	27	10	10	18	7	9	17	19	6	12	8	2	5	0	10	13	6	3	4	13	6	15
Otu01002	Bacteria	Firmicutes	Clostridia	Clostridiales	Ruminococcaceae	Ruminococcaceae_unclassified	414	0	2	0	2	3	3	9	3	5	11	15	14	7	5	7	12	4	0	1	1	1	7	4	4	5	2	15	2	3	4	10	0	15	1	1	3	8	5	8	5	8	8
Otu01003	Bacteria	Chloroflexi	Chloroflexia	Thermomicrobiales	JG30-KF-CM45	JG30-KF-CM45_ge	979	0	5	20	12	8	8	35	29	28	30	38	35	33	16	16	0	2	0	9	21	21	20	14	18	16	10	5	3	5	3	0	0	0	1	9	28	16	13	0	1	0	1
Otu01004	Bacteria	Firmicutes	Clostridia	Clostridiales	Ruminococcaceae	Ruminiclostridium_1	378	0	1	1	0	3	1	2	3	9	23	14	14	15	13	16	1	3	0	1	2	0	7	2	0	22	19	8	5	9	1	5	3	11	18	6	7	5	1	0	0	2	1
Otu01005	Bacteria	Proteobacteria	Alphaproteobacteria	Rhizobiales	Hyphomicrobiaceae	Hyphomicrobium	713	0	1	0	0	0	1	3	7	66	139	49	15	6	2	8	2	3	0	0	0	0	0	9	9	25	9	1	9	3	7	2	1	0	0	0	0	3	4	14	5	3	2
Otu01006	Bacteria	Proteobacteria	Alphaproteobacteria	Tistrellales	Geminicoccaceae	uncultured	1095	0	6	12	8	0	0	57	56	50	58	33	16	26	25	42	3	3	0	1	2	12	36	14	20	21	2	1	23	6	20	4	1	2	0	4	2	6	4	8	8	1	31
Otu01007	Bacteria	Gemmatimonadetes	Gemmatimonadetes	Gemmatimonadales	Gemmatimonadaceae	uncultured	1224	5	26	60	30	1	2	12	24	55	38	50	1	15	0	1	2	0	4	23	7	3	21	17	11	20	9	2	0	0	6	0	0	1	8	59	4	19	11	0	0	0	0
Otu01008	Bacteria	Planctomycetes	Pla4_lineage	Pla4_lineage_or	Pla4_lineage_fa	Pla4_lineage_ge	562	0	0	0	2	0	3	7	6	20	20	14	16	10	13	18	23	4	0	0	0	1	2	2	0	4	17	4	6	5	15	14	2	3	0	4	1	7	6	4	7	10	0
Otu01009	Bacteria	Planctomycetes	Pla3_lineage	Pla3_lineage_or	Pla3_lineage_fa	Pla3_lineage_ge	1477	0	0	9	7	8	26	58	25	23	28	81	162	64	50	30	24	4	0	2	3	9	7	6	10	11	60	10	32	1	31	14	0	3	0	2	2	21	16	15	14	3	27
Otu01010	Bacteria	Actinobacteria	Thermoleophilia	Solirubrobacterales	67-14	67-14_ge	437	0	1	1	5	0	1	16	15	22	25	17	16	12	16	12	0	5	1	1	0	1	11	5	3	5	3	2	16	6	7	3	1	1	0	5	3	2	0	4	2	3	0
Otu01011	Bacteria	Chloroflexi	KD4-96	KD4-96_or	KD4-96_fa	KD4-96_ge	606	0	1	3	1	1	4	17	1	8	5	12	5	4	4	5	5	4	0	2	4	7	20	16	15	0	13	0	6	5	7	1	20	32	1	3	1	19	12	4	9	17	8
Otu01012	Bacteria	Chloroflexi	Anaerolineae	Anaerolineales	Anaerolineaceae	uncultured	1554	0	0	0	0	0	0	0	0	1	0	1	0	0	0	0	3	4	0	0	0	0	0	0	0	0	3	0	25	0	38	0	464	228	0	0	0	0	0	15	14	14	20
Otu01013	Bacteria	Proteobacteria	Deltaproteobacteria	NB1-j	NB1-j_fa	NB1-j_ge	684	0	1	2	0	1	3	2	3	11	38	60	33	22	21	9	0	10	0	1	3	2	1	0	4	7	40	5	11	1	10	2	6	14	0	1	11	4	7	2	0	6	1
Otu01014	Bacteria	Proteobacteria	Deltaproteobacteria	Desulfarculales	Desulfarculaceae	Desulfatiglans	762	0	0	0	0	0	5	2	2	1	6	2	1	2	2	1	7	12	0	0	2	2	3	0	1	0	9	0	10	0	15	2	35	109	0	1	6	2	4	5	2	72	47
Otu01015	Bacteria	Nitrospirae	2001-04-29	4-29-1_or	4-29-1_fa	4-29-1_ge	142	0	0	0	0	0	0	0	0	0	0	1	2	2	1	0	1	8	0	0	0	0	0	0	0	0	2	0	0	0	1	0	14	31	0	0	0	0	0	1	0	7	0
Otu01016	Bacteria	Chloroflexi	Ktedonobacteria	Ktedonobacterales	Ktedonobacteraceae	Ktedonobacteraceae_unclassified	1173	0	0	0	0	0	0	0	0	0	4	0	0	0	0	0	0	1	0	1	0	0	0	0	0	0	3	0	27	0	46	0	16	471	0	0	0	0	0	4	3	34	19
Otu01017	Bacteria	Actinobacteria	Acidimicrobiia	Microtrichales	Iamiaceae	Iamia	1215	153	53	22	6	5	9	14	5	17	13	28	6	13	13	7	0	5	107	44	9	7	3	6	9	3	5	1	4	2	1	3	0	1	74	17	17	2	1	2	0	1	1
Otu01018	Bacteria	Acidobacteria	Subgroup_15	Subgroup_15_or	Subgroup_15_fa	Subgroup_15_ge	429	0	1	0	1	0	2	15	1	18	11	4	0	8	11	15	29	11	0	0	0	2	0	7	5	5	0	5	14	5	28	19	6	2	0	0	0	5	2	6	3	8	2
Otu01019	Bacteria	Bacteria_unclassified	Bacteria_unclassified	Bacteria_unclassified	Bacteria_unclassified	Bacteria_unclassified	426	0	0	0	0	0	0	0	0	0	0	0	0	0	0	1	2	0	0	0	0	0	0	0	0	0	1	0	10	0	19	0	4	19	0	0	0	0	0	1	1	3	229
Otu01020	Bacteria	Planctomycetes	Planctomycetacia	Pirellulales	Pirellulaceae	uncultured	978	7	14	12	1	2	5	7	13	37	39	23	35	30	27	24	28	11	6	3	0	3	14	9	8	5	20	14	18	3	17	1	15	24	5	4	0	3	4	4	3	18	5
Otu01021	Bacteria	Actinobacteria	Thermoleophilia	Gaiellales	Gaiellales_unclassified	Gaiellales_unclassified	852	6	20	11	9	8	5	45	23	42	28	20	19	9	0	0	0	13	5	11	15	19	27	18	19	6	12	1	2	0	0	1	0	4	5	15	19	18	11	1	0	1	3
Otu01022	Bacteria	Proteobacteria	Deltaproteobacteria	Desulfobacterales	Desulfobulbaceae	uncultured	1255	0	0	0	0	6	11	23	32	99	48	23	7	21	15	10	7	3	0	1	1	5	22	13	6	4	3	4	101	20	36	3	1	1	0	5	5	9	30	114	24	38	11
Otu01023	Bacteria	Bacteroidetes	Bacteroidia	Flavobacteriales	Flavobacteriaceae	Hoppeia	1837	0	0	0	0	0	0	0	0	0	0	12	28	26	109	92	742	27	0	0	0	0	0	0	0	0	42	0	30	1	95	23	2	1	0	0	0	0	0	13	39	9	5
Otu01024	Bacteria	Proteobacteria	Gammaproteobacteria	Gammaproteobacteria_Incertae_Sedis	Unknown_Family	Acidibacter	562	19	27	20	4	4	6	4	27	13	9	15	3	5	5	1	0	0	19	3	1	0	6	2	8	4	0	0	2	0	0	0	1	12	21	10	4	2	14	1	2	1	2
Otu01025	Bacteria	Proteobacteria	Gammaproteobacteria	B2M28	B2M28_fa	B2M28_ge	696	0	1	0	0	0	0	6	2	7	27	15	9	17	22	147	21	3	0	0	0	1	7	0	3	19	2	3	15	3	6	4	1	4	0	0	0	2	5	5	6	11	9
Otu01026	Bacteria	Actinobacteria	MB-A2-108	MB-A2-108_or	MB-A2-108_fa	MB-A2-108_ge	122	0	1	0	0	0	0	2	2	5	5	1	8	3	2	2	0	2	0	0	0	1	2	0	0	0	10	1	9	0	2	0	0	0	0	0	0	0	2	0	1	0	1
Otu01027	Bacteria	Proteobacteria	Gammaproteobacteria	Acidiferrobacterales	Acidiferrobacteraceae	Sulfurifustis	1508	8	12	19	5	0	8	5	2	2	0	34	113	10	0	1	0	4	40	16	0	4	0	2	1	0	584	1	0	0	2	1	30	58	80	4	2	0	2	0	1	3	0
Otu01028	Bacteria	Nitrospirae	Nitrospira	Nitrospirales	Nitrospiraceae	Nitrospira	897	5	21	4	7	0	1	4	17	20	16	12	10	16	27	5	1	5	0	10	1	2	2	3	3	11	16	26	57	6	10	4	0	0	23	10	0	41	36	8	2	6	2
Otu01029	Bacteria	Actinobacteria	Actinobacteria	Frankiales	Sporichthyaceae	uncultured	574	91	59	26	5	0	5	3	3	15	2	5	1	1	0	2	0	1	15	17	5	0	3	4	5	0	0	2	0	1	0	0	0	2	21	8	1	0	0	0	0	3	0
Otu01030	Bacteria	Acidobacteria	Subgroup_6	Subgroup_6_unclassified	Subgroup_6_unclassified	Subgroup_6_unclassified	912	200	95	27	5	1	22	0	2	13	4	10	0	0	0	2	0	2	44	26	4	1	3	0	2	0	1	0	0	0	0	4	0	1	66	9	0	2	0	1	0	1	0
Otu01031	Bacteria	Proteobacteria	Gammaproteobacteria	Gammaproteobacteria_unclassified	Gammaproteobacteria_unclassified	Gammaproteobacteria_unclassified	823	0	0	0	0	0	0	0	1	5	21	39	107	52	44	31	28	6	0	0	0	0	0	1	0	6	33	2	36	12	51	6	1	1	0	0	0	0	3	27	5	9	11
Otu01032	Bacteria	Proteobacteria	Gammaproteobacteria	Gammaproteobacteria_unclassified	Gammaproteobacteria_unclassified	Gammaproteobacteria_unclassified	783	0	0	0	0	0	0	0	0	0	4	1	0	0	0	1	9	84	0	0	0	0	0	0	0	0	0	0	3	0	1	0	7	495	0	0	0	0	0	2	2	1	4
Otu01033	Bacteria	Bacteroidetes	Bacteroidia	Chitinophagales	Chitinophagaceae	uncultured	637	135	16	3	1	0	5	0	0	6	8	41	1	3	0	3	4	2	22	7	2	0	1	1	1	0	0	0	1	0	0	0	0	0	116	5	0	0	0	0	0	0	2
Otu01034	Bacteria	Proteobacteria	Deltaproteobacteria	Desulfuromonadales	Geobacteraceae	Geothermobacter	1309	0	0	0	0	0	0	0	0	0	0	0	1	0	0	0	2	4	0	0	0	0	0	0	0	0	1	0	2	0	5	0	891	4	0	0	0	0	0	6	25	71	23
Otu01035	Bacteria	Entotheonellaeota	Entotheonellia	Entotheonellales	Entotheonellaceae	Candidatus_Entotheonella	957	0	3	12	7	3	6	24	1	88	53	87	83	40	4	2	0	7	1	0	7	9	2	3	3	2	191	0	5	0	1	0	0	1	0	2	0	1	2	3	8	0	5
Otu01036	Bacteria	Planctomycetes	Phycisphaerae	CCM11a	CCM11a_fa	CCM11a_ge	966	0	0	0	0	2	15	27	13	13	30	56	86	44	38	30	28	6	0	0	1	1	2	3	1	4	86	0	13	0	23	1	1	1	0	0	0	6	4	11	20	2	31
Otu01037	Bacteria	Planctomycetes	Planctomycetacia	Planctomycetales	uncultured	uncultured_ge	871	28	58	112	71	55	8	1	0	7	0	1	1	0	0	0	0	1	62	27	37	1	2	3	6	0	0	0	0	0	0	0	0	1	20	16	8	0	0	0	0	0	0
Otu01038	Bacteria	Bacteroidetes	Bacteroidia	Bacteroidetes_VC2.1_Bac22	Bacteroidetes_VC2.1_Bac22_fa	Bacteroidetes_VC2.1_Bac22_ge	1622	0	0	0	0	0	0	0	0	2	1	0	2	3	3	1	4	26	0	0	0	0	0	0	0	0	0	0	3	0	1	1	140	34	0	2	0	0	0	9	18	251	35
Otu01039	Bacteria	Chloroflexi	KD4-96	KD4-96_or	KD4-96_fa	KD4-96_ge	712	9	13	8	7	4	10	19	6	12	4	1	1	1	1	0	0	9	2	8	4	4	8	4	2	0	1	1	5	0	9	1	29	89	5	11	0	3	21	1	2	2	35
Otu01040	Bacteria	Proteobacteria	Deltaproteobacteria	Desulfobacterales	Desulfobacteraceae	SEEP-SRB1	1568	0	0	0	0	0	0	0	0	0	4	0	0	3	3	5	25	41	0	0	0	0	0	0	0	0	2	0	4	0	11	2	349	305	0	0	0	0	0	7	6	106	12
Otu01041	Bacteria	Chloroflexi	Anaerolineae	SBR1031	A4b	A4b_ge	753	0	31	59	14	11	2	4	7	19	3	1	9	3	3	1	2	3	22	20	9	3	4	7	12	0	1	0	0	2	0	4	1	1	1	8	1	1	0	4	2	20	2
Otu01042	Bacteria	Firmicutes	Bacilli	Bacillales	Planococcaceae	Psychrobacillus	1269	2	4	2	3	16	19	43	36	49	10	6	20	6	9	17	2	7	2	11	9	86	110	78	107	4	1	5	0	4	1	9	2	10	7	9	6	1	1	0	2	2	2
Otu01043	Bacteria	Gemmatimonadetes	S0134_terrestrial_group	S0134_terrestrial_group_or	S0134_terrestrial_group_fa	S0134_terrestrial_group_ge	1877	0	1	1	8	46	133	20	14	43	93	91	126	73	50	40	24	12	0	0	49	1	5	3	2	27	38	31	38	5	21	3	1	0	0	2	43	2	26	15	11	2	14
Otu01044	Bacteria	Chloroflexi	Anaerolineae	SBR1031	A4b	A4b_ge	1361	0	0	0	0	0	0	1	0	1	0	0	3	10	21	62	112	67	0	0	0	0	0	0	0	0	2	4	11	1	59	11	14	1	0	0	0	0	0	28	41	71	7
Otu01045	Bacteria	Proteobacteria	Alphaproteobacteria	Caulobacterales	Caulobacteraceae	Caulobacteraceae_unclassified	599	24	19	32	4	7	6	3	2	11	3	5	54	3	8	0	2	11	10	12	1	1	0	0	2	0	1	0	2	0	4	1	2	75	9	9	2	4	0	2	6	0	0
Otu01046	Bacteria	Acidobacteria	Subgroup_15	Subgroup_15_or	Subgroup_15_fa	Subgroup_15_ge	342	0	0	0	2	0	0	4	19	12	14	5	11	6	13	4	6	6	0	0	0	0	5	6	0	1	1	1	4	6	5	0	0	1	0	3	0	10	6	2	2	4	1
Otu01047	Bacteria	Proteobacteria	Alphaproteobacteria	Rhizobiales	Devosiaceae	Devosia	694	14	18	6	3	1	8	5	13	22	8	4	12	1	15	22	31	17	17	9	2	0	8	4	5	0	1	0	2	3	8	1	2	26	11	18	0	1	1	2	3	22	2
Otu01048	Bacteria	Actinobacteria	Nitriliruptoria	Euzebyales	Euzebyaceae	uncultured	770	21	58	12	8	14	14	13	6	43	1	4	5	1	0	5	1	0	26	21	5	5	3	4	9	0	0	0	1	0	1	1	0	0	8	9	4	2	0	0	2	0	0
Otu01049	Bacteria	Gemmatimonadetes	Gemmatimonadetes	Gemmatimonadales	Gemmatimonadaceae	uncultured	1030	0	11	1	0	1	4	121	67	47	15	28	106	41	2	0	2	29	0	0	0	15	0	2	9	1	3	8	9	0	1	0	0	3	0	25	8	35	16	2	1	1	1
Otu01050	Bacteria	Proteobacteria	Gammaproteobacteria	Betaproteobacteriales	Sulfuricellaceae	Sulfuricella	1116	0	0	0	2	1	5	16	3	10	2	5	2	12	1	1	1	164	0	4	7	8	4	0	0	3	3	0	2	5	1	0	0	19	1	16	0	4	12	41	9	1	1
Otu01051	Bacteria	Proteobacteria	Deltaproteobacteria	Deltaproteobacteria_unclassified	Deltaproteobacteria_unclassified	Deltaproteobacteria_unclassified	725	0	0	0	0	0	0	1	4	5	11	6	174	146	4	0	2	0	0	0	0	1	0	0	2	0	24	1	2	2	0	0	0	2	0	1	0	0	72	1	3	0	1
Otu01052	Bacteria	Proteobacteria	Deltaproteobacteria	Desulfarculales	Desulfarculaceae	uncultured	710	0	0	0	0	0	1	1	2	4	6	7	9	14	45	78	132	3	0	0	1	1	2	0	0	2	1	2	19	5	13	8	0	7	0	0	2	1	0	9	27	5	21
Otu01053	Bacteria	Chloroflexi	Anaerolineae	Anaerolineales	Anaerolineaceae	uncultured	1750	0	0	0	0	0	0	1	9	14	25	40	75	111	89	52	67	12	0	0	0	0	0	0	0	4	23	18	113	18	135	14	4	5	0	0	0	0	2	36	88	20	19
Otu01054	Bacteria	Acidobacteria	Subgroup_6	Subgroup_6_unclassified	Subgroup_6_unclassified	Subgroup_6_unclassified	112	4	7	1	1	1	1	0	1	2	4	2	2	1	5	0	6	1	1	3	0	1	1	0	0	0	0	0	1	1	2	0	0	0	0	0	2	0	0	2	2	0	5
Otu01055	Bacteria	Gemmatimonadetes	S0134_terrestrial_group	S0134_terrestrial_group_or	S0134_terrestrial_group_fa	S0134_terrestrial_group_ge	3235	0	3	10	3	74	77	63	31	77	134	276	306	82	64	50	23	10	0	0	33	14	16	13	24	43	193	18	38	8	14	4	1	4	0	2	24	46	44	9	13	0	14
Otu01056	Bacteria	Acidobacteria	Acidobacteriia	Solibacterales	Solibacteraceae_(Subgroup_3)	Bryobacter	1458	1	4	15	2	31	47	59	67	55	24	17	25	5	0	3	1	3	6	12	241	78	24	29	50	4	44	6	2	1	4	3	0	16	2	10	31	6	1	1	1	0	0
Otu01057	Bacteria	Chloroflexi	Anaerolineae	SBR1031	A4b	A4b_ge	1823	0	0	29	8	21	17	104	24	52	80	54	75	63	2	15	5	9	0	5	14	8	16	13	17	24	84	5	11	1	8	0	1	3	0	0	11	3	5	17	7	3	3
Otu01058	Bacteria	Chloroflexi	Anaerolineae	Anaerolineales	Anaerolineaceae	uncultured	634	0	0	0	0	0	0	0	2	2	3	2	3	10	3	2	0	10	4	0	0	0	0	0	0	2	0	0	2	0	4	0	43	79	0	0	0	0	0	1	3	34	65
Otu01059	Bacteria	Acidobacteria	Thermoanaerobaculia	Thermoanaerobaculales	Thermoanaerobaculaceae	Subgroup_10	986	0	0	0	0	0	0	1	3	17	22	59	215	40	65	62	54	13	0	0	0	1	0	0	1	5	13	2	16	23	19	10	1	2	0	0	0	0	7	6	10	8	1
Otu01060	Bacteria	Firmicutes	Clostridia	Clostridiales	Ruminococcaceae	Ruminococcaceae_unclassified	320	1	3	0	3	4	4	21	3	4	1	1	2	4	5	5	6	3	0	0	1	0	0	0	2	5	2	1	2	1	6	5	6	56	0	6	2	1	1	1	3	5	5
Otu01061	Bacteria	Bacteria_unclassified	Bacteria_unclassified	Bacteria_unclassified	Bacteria_unclassified	Bacteria_unclassified	997	0	0	11	5	46	21	23	11	25	62	61	108	23	5	4	5	4	0	5	31	4	8	4	4	3	39	0	7	0	2	0	0	2	0	3	13	5	4	4	5	1	5
Otu01062	Bacteria	Bacteria_unclassified	Bacteria_unclassified	Bacteria_unclassified	Bacteria_unclassified	Bacteria_unclassified	112	0	0	0	0	0	0	0	0	6	10	1	0	1	5	15	1	0	0	0	0	0	1	1	0	0	1	4	8	2	2	1	0	0	0	0	0	0	1	1	2	5	0
Otu01063	Bacteria	Planctomycetes	Planctomycetacia	Gemmatales	Gemmataceae	uncultured	1102	9	15	11	2	4	6	1	18	44	54	95	56	32	24	28	35	13	6	6	3	4	9	15	7	6	42	12	11	1	0	0	0	3	9	6	1	6	5	2	0	0	2
Otu01064	Bacteria	Omnitrophicaeota	Omnitrophicaeota_cl	Omnitrophicaeota_or	Omnitrophicaeota_fa	Omnitrophicaeota_ge	1292	0	0	0	0	0	0	2	3	35	22	37	10	84	126	84	87	9	0	0	0	0	1	7	2	7	4	14	75	6	71	35	3	2	0	0	0	0	0	36	71	18	2
Otu01065	Bacteria	Chloroflexi	Dehalococcoidia	SAR202_clade	SAR202_clade_fa	SAR202_clade_ge	761	0	0	0	0	0	0	0	2	8	14	10	18	14	75	36	67	5	0	0	0	0	0	1	0	2	12	11	31	6	27	2	3	2	0	0	0	0	0	25	48	10	60
Otu01066	Bacteria	Proteobacteria	Alphaproteobacteria	Rhizobiales	Rhizobiales_unclassified	Rhizobiales_unclassified	1681	0	0	1	2	0	0	14	31	127	109	83	50	29	53	53	84	12	0	0	0	2	11	32	17	29	39	4	31	21	48	14	0	2	0	4	0	28	18	12	37	7	97
Otu01067	Bacteria	Verrucomicrobia	Verrucomicrobiae	Pedosphaerales	Pedosphaeraceae	Pedosphaeraceae_ge	892	0	0	0	0	0	0	0	0	2	4	1	4	3	20	44	317	8	0	0	0	0	0	0	0	0	3	1	13	13	83	6	0	8	0	0	0	0	0	12	29	2	11
Otu01068	Bacteria	Proteobacteria	Gammaproteobacteria	Betaproteobacteriales	Nitrosomonadaceae	GOUTA6	753	0	0	0	0	0	0	0	0	0	0	0	1	2	47	0	88	26	0	0	0	0	0	0	0	0	2	0	6	0	5	0	39	96	0	0	0	0	0	5	25	21	3
Otu01069	Bacteria	Bacteroidetes	Bacteroidia	Sphingobacteriales	NS11-12_marine_group	NS11-12_marine_group_ge	1424	0	4	20	6	9	6	8	4	6	30	47	83	56	22	30	13	37	1	6	7	0	3	0	3	13	31	1	9	0	43	13	154	7	0	0	7	4	8	22	16	4	2
Otu01070	Bacteria	Proteobacteria	Alphaproteobacteria	Sphingomonadales	Sphingomonadaceae	Novosphingobium	1048	6	23	10	5	22	16	19	7	45	71	45	18	20	54	17	17	5	6	7	9	8	5	0	2	15	33	0	9	2	22	9	1	2	12	4	8	9	5	2	19	9	13
Otu01071	Bacteria	Bacteroidetes	Bacteroidia	Sphingobacteriales	env.OPS_17	env.OPS_17_ge	2007	9	6	7	3	19	22	91	73	180	151	79	76	28	61	61	85	7	5	0	3	4	17	16	7	10	22	5	60	13	34	16	0	0	10	0	1	9	28	14	42	4	14
Otu01072	Bacteria	Planctomycetes	Planctomycetacia	Pirellulales	Pirellulaceae	uncultured	319	16	28	9	2	3	7	2	5	11	12	6	3	1	8	1	1	3	15	10	2	2	7	1	2	1	1	2	4	4	1	5	2	2	3	1	0	3	0	0	5	2	1
Otu01073	Bacteria	Acidobacteria	Subgroup_17	Subgroup_17_or	Subgroup_17_fa	Subgroup_17_ge	1409	0	12	14	18	0	5	48	51	64	47	39	16	4	1	8	1	7	0	4	1	10	22	26	16	24	21	33	14	3	2	1	0	1	10	35	11	39	20	2	0	2	0
Otu01074	Bacteria	Firmicutes	Clostridia	Clostridiales	Ruminococcaceae	Anaerobacterium	255	0	1	1	0	2	5	0	1	2	5	4	8	3	6	9	2	1	0	0	2	0	0	0	0	2	9	6	0	1	14	21	2	14	1	3	0	0	0	7	14	0	4
Otu01075	Bacteria	Actinobacteria	Thermoleophilia	Solirubrobacterales	67-14	67-14_ge	755	69	11	37	4	2	3	1	1	5	1	4	2	1	0	2	2	1	37	34	12	45	4	8	9	0	1	0	2	6	1	4	5	3	23	2	0	1	1	3	2	9	1
Otu01076	Bacteria	Actinobacteria	Actinobacteria	Micromonosporales	Micromonosporaceae	Actinoplanes	647	67	4	0	0	0	23	0	0	4	1	24	1	1	1	1	1	3	34	11	1	0	1	0	1	0	0	0	0	0	0	4	0	2	28	12	0	1	1	0	0	0	0
Otu01077	Bacteria	Rokubacteria	NC10	Rokubacteriales	Rokubacteriales_fa	Rokubacteriales_ge	2237	0	31	22	19	355	397	42	35	58	5	22	13	7	0	4	4	0	0	5	142	21	11	5	19	2	31	0	1	1	2	2	1	2	0	3	70	8	1	0	0	0	2
Otu01078	Bacteria	Verrucomicrobia	Verrucomicrobiae	Pedosphaerales	Pedosphaeraceae	Pedosphaeraceae_ge	785	0	0	0	0	1	0	0	1	27	26	30	95	49	29	22	28	8	0	0	0	0	0	3	0	9	48	1	49	5	19	0	1	0	0	0	0	1	4	12	18	6	2
Otu01079	Bacteria	Bacteroidetes	Bacteroidia	Cytophagales	Microscillaceae	Microscillaceae_unclassified	573	1	5	5	2	9	16	15	26	41	13	16	5	5	9	1	5	0	1	6	5	5	2	6	3	2	50	0	2	1	10	1	0	0	2	6	5	18	7	1	5	0	21
Otu01080	Bacteria	Chloroflexi	Chloroflexia	Thermomicrobiales	JG30-KF-CM45	JG30-KF-CM45_ge	2005	78	120	95	32	63	59	43	27	35	43	49	2	3	2	8	1	2	67	60	47	12	11	12	19	17	4	0	6	2	3	3	0	2	39	17	33	24	3	2	2	1	0
Otu01081	Bacteria	Proteobacteria	Alphaproteobacteria	Acetobacterales	Acetobacteraceae	Acetobacteraceae_unclassified	738	143	10	2	0	0	10	0	0	12	2	23	1	0	0	2	0	1	25	17	2	1	0	1	22	0	0	0	0	0	0	25	0	1	29	7	1	1	1	0	1	1	0
Otu01082	Bacteria	Actinobacteria	Thermoleophilia	Thermoleophilia_unclassified	Thermoleophilia_unclassified	Thermoleophilia_unclassified	109	2	4	3	1	0	0	7	6	8	3	3	5	2	1	0	0	0	0	2	0	1	2	2	4	1	4	0	3	0	0	0	0	0	0	1	0	3	1	1	0	0	0
Otu01083	Bacteria	Firmicutes	Clostridia	Clostridiales	Clostridiaceae_1	Clostridium_sensu_stricto_1	976	1	5	4	6	6	9	3	10	21	19	7	6	5	5	11	6	4	1	3	2	1	10	33	18	5	5	1	3	1	19	3	14	40	5	19	0	1	1	16	184	29	12
Otu01084	Bacteria	Proteobacteria	Alphaproteobacteria	Caulobacterales	Parvularculaceae	Amphiplicatus	1445	0	0	0	0	0	0	0	0	3	17	8	5	20	33	17	39	3	0	0	0	0	0	0	2	0	4	16	225	11	14	0	2	2	0	0	0	0	0	95	67	12	357
Otu01085	Bacteria	Acidobacteria	Subgroup_6	Subgroup_6_or	Subgroup_6_fa	Subgroup_6_ge	771	0	0	1	0	0	0	11	18	43	74	45	25	15	41	27	67	2	0	1	0	2	2	6	4	9	20	5	28	2	20	1	1	1	0	0	0	1	0	7	10	2	8
Otu01086	Bacteria	Bacteroidetes	Bacteroidia	Chitinophagales	Chitinophagaceae	uncultured	321	13	10	5	2	5	10	9	9	30	7	5	16	3	7	3	16	2	4	4	4	1	0	1	0	0	5	1	3	0	2	0	0	2	6	2	1	2	0	0	3	2	3
Otu01087	Bacteria	Bacteria_unclassified	Bacteria_unclassified	Bacteria_unclassified	Bacteria_unclassified	Bacteria_unclassified	1234	0	0	0	0	0	0	0	0	0	1	0	0	1	8	47	56	0	0	0	0	0	0	0	0	0	1	0	8	0	10	1	7	8	0	0	0	0	0	2	10	20	767
Otu01088	Bacteria	Chloroflexi	JG30-KF-CM66	JG30-KF-CM66_or	JG30-KF-CM66_fa	JG30-KF-CM66_ge	575	1	13	1	7	3	1	11	6	9	5	9	3	6	9	6	47	20	2	1	2	4	1	1	4	1	7	0	11	6	27	14	20	36	0	0	0	2	0	3	17	16	7
Otu01089	Bacteria	Proteobacteria	Gammaproteobacteria	JTB23	JTB23_fa	JTB23_ge	1209	0	0	11	10	10	7	1	1	17	6	61	125	43	33	67	48	27	0	0	7	0	0	4	1	7	31	1	34	3	58	2	19	4	0	0	1	3	1	16	44	12	2
Otu01090	Bacteria	Patescibacteria	Microgenomatia	Candidatus_Woesebacteria	Candidatus_Woesebacteria_fa	Candidatus_Woesebacteria_ge	812	0	0	0	0	0	0	0	0	0	3	0	0	1	4	0	3	11	0	0	0	0	0	0	0	0	9	0	29	2	42	0	46	176	0	0	0	0	0	6	8	16	93
Otu01091	Bacteria	Planctomycetes	Phycisphaerae	Pla1_lineage	Pla1_lineage_fa	Pla1_lineage_ge	644	0	0	0	0	0	3	7	2	5	4	11	44	35	36	19	8	9	0	0	0	0	0	0	0	2	24	3	14	1	13	2	4	1	0	0	0	0	1	26	22	12	12
Otu01092	Archaea	Thaumarchaeota	Nitrososphaeria	Nitrososphaerales	Nitrososphaeraceae	Nitrososphaeraceae_unclassified	107	31	3	0	1	0	1	0	0	4	0	8	0	1	0	0	0	0	4	2	3	0	0	0	3	0	0	0	0	0	0	0	0	1	10	0	0	0	0	0	0	0	1
Otu01093	Bacteria	Acidobacteria	Subgroup_6	Subgroup_6_or	Subgroup_6_fa	Subgroup_6_ge	553	0	9	29	21	89	34	23	2	8	1	0	0	5	5	6	2	1	0	3	21	8	1	3	8	1	2	2	1	4	4	2	1	0	0	3	11	5	1	0	2	0	0
Otu01094	Bacteria	Bacteroidetes	Bacteroidia	Chitinophagales	37-13	37-13_ge	431	4	22	12	6	3	5	2	0	1	0	4	5	1	5	19	32	3	9	10	3	0	5	7	3	0	1	0	5	1	6	5	0	4	13	8	1	1	0	3	30	4	1
Otu01095	Bacteria	Gemmatimonadetes	Gemmatimonadetes	Gemmatimonadales	Gemmatimonadaceae	uncultured	1340	0	0	1	0	0	0	5	9	7	29	115	43	89	1	0	0	7	0	0	0	2	7	3	1	49	121	3	3	0	6	1	9	27	0	5	1	27	31	5	3	4	3
Otu01096	Bacteria	Bacteroidetes	Ignavibacteria	Ignavibacteriales	Ignavibacteriales_unclassified	Ignavibacteriales_unclassified	812	0	0	0	0	0	0	0	0	6	1	0	0	0	3	0	0	6	0	0	0	0	0	0	0	0	3	0	13	0	32	0	66	177	0	0	0	1	0	7	6	3	20
Otu01097	Bacteria	Latescibacteria	Latescibacteria_cl	Latescibacteria_or	Latescibacteria_fa	Latescibacteria_ge	253	0	0	0	0	0	0	0	0	3	3	1	4	2	3	2	2	2	0	1	0	0	0	0	1	1	0	10	4	0	6	7	2	5	1	4	0	5	21	1	0	8	32
Otu01098	Bacteria	Firmicutes	Negativicutes	Selenomonadales	Veillonellaceae	Anaerosporomusa	369	2	6	2	0	11	9	0	8	10	15	23	14	7	3	3	2	0	13	3	4	1	6	0	1	1	14	4	2	0	3	1	0	2	14	1	3	3	2	1	0	0	0
Otu01099	Bacteria	Proteobacteria	Gammaproteobacteria	Xanthomonadales	Xanthomonadaceae	Lysobacter	1020	0	11	71	140	8	3	4	26	6	11	35	5	4	0	1	6	14	5	27	2	0	12	6	4	4	5	0	0	0	0	0	1	0	0	32	4	14	22	0	2	0	3
Otu01100	Bacteria	Proteobacteria	Gammaproteobacteria	Ectothiorhodospirales	Thioalkalispiraceae	SS1-B-09-64	2007	0	0	0	0	0	0	1	0	6	10	3	0	13	22	109	46	24	0	0	0	0	0	0	0	12	4	4	75	63	239	53	109	4	0	0	0	0	1	104	177	41	15
Otu01101	Bacteria	Proteobacteria	Deltaproteobacteria	Desulfobacterales	Desulfobacteraceae	Desulfatitalea	590	0	1	2	0	5	6	4	0	2	3	1	4	3	6	3	13	7	0	0	24	2	2	0	6	0	4	0	4	4	9	4	15	44	0	5	15	0	2	6	26	30	56
Otu01102	Bacteria	Gemmatimonadetes	Gemmatimonadetes	Gemmatimonadales	Gemmatimonadaceae	uncultured	1441	0	1	0	0	0	0	2	12	118	39	83	96	35	19	26	61	25	2	0	0	0	1	28	2	15	29	5	24	14	50	10	37	16	1	0	0	4	16	15	30	3	3
Otu01103	Bacteria	Acidobacteria	Thermoanaerobaculia	Thermoanaerobaculales	Thermoanaerobaculaceae	Subgroup_10	1483	0	0	1	2	0	1	11	12	16	50	68	43	45	34	99	69	30	2	0	0	1	1	1	2	24	18	22	43	30	38	10	35	46	0	3	2	3	4	14	7	23	3
Otu01104	Bacteria	Chloroflexi	Anaerolineae	Anaerolineales	Anaerolineaceae	uncultured	1141	0	0	0	0	0	0	0	2	2	3	1	1	3	18	1	6	11	0	0	0	0	0	1	0	0	6	1	45	0	91	0	47	183	0	0	0	0	0	9	13	3	4
Otu01105	Bacteria	Planctomycetes	Planctomycetacia	Pirellulales	Pirellulaceae	Pir4_lineage	1570	0	0	0	0	0	0	0	25	22	2	20	39	51	50	79	32	71	0	0	0	0	0	4	1	1	3	28	38	6	63	32	27	43	0	0	0	0	4	23	59	87	7
Otu01106	Bacteria	Chloroflexi	Anaerolineae	Anaerolineales	Anaerolineaceae	UTCFX1	1445	106	110	27	10	3	14	1	1	8	0	15	1	3	0	1	0	1	138	51	15	3	6	2	7	0	0	0	2	0	1	7	1	2	190	15	1	5	1	3	1	0	2
Otu01107	Bacteria	Acidobacteria	Subgroup_6	Subgroup_6_or	Subgroup_6_fa	Subgroup_6_ge	193	0	0	0	0	0	0	2	0	3	1	7	4	3	2	11	22	3	1	0	0	5	3	3	1	1	0	0	2	0	5	5	2	3	1	0	0	0	0	3	7	7	7
Otu01108	Bacteria	Gemmatimonadetes	S0134_terrestrial_group	S0134_terrestrial_group_or	S0134_terrestrial_group_fa	S0134_terrestrial_group_ge	1183	0	59	100	53	58	28	45	16	32	10	19	24	13	50	5	8	3	0	14	7	12	28	12	18	0	10	2	1	0	7	0	0	2	0	13	0	2	3	2	22	2	23
Otu01109	Bacteria	Planctomycetes	Phycisphaerae	Phycisphaerales	Phycisphaeraceae	uncultured	1685	0	0	1	0	4	6	25	14	43	147	73	89	79	215	31	21	7	0	0	0	10	0	4	7	19	97	11	68	17	62	7	2	2	0	1	0	1	2	8	5	4	8
Otu01110	Bacteria	Acidobacteria	Blastocatellia_(Subgroup_4)	Blastocatellales	Blastocatellaceae	uncultured	1601	141	318	134	28	12	28	3	7	15	4	20	2	6	1	2	3	4	43	41	10	1	5	2	5	2	0	0	1	0	1	4	0	2	117	60	22	1	2	0	2	0	0
Otu01111	Bacteria	Acidobacteria	Subgroup_21	Subgroup_21_or	Subgroup_21_fa	Subgroup_21_ge	493	0	3	3	2	1	1	8	4	3	2	7	26	6	3	2	1	9	1	2	16	3	0	4	3	1	10	0	0	0	1	0	10	78	0	11	27	3	1	0	1	2	1
Otu01112	Bacteria	Chloroflexi	Anaerolineae	SBR1031	A4b	A4b_ge	1738	0	0	1	3	7	16	24	35	113	106	85	219	60	115	16	49	10	0	1	5	3	12	10	9	17	39	4	60	9	31	2	2	2	0	0	1	3	9	11	30	7	22
Otu01113	Bacteria	Gemmatimonadetes	Gemmatimonadetes	Gemmatimonadales	Gemmatimonadaceae	uncultured	1229	0	0	5	11	1	5	65	20	22	44	69	32	40	3	8	0	11	0	0	5	6	7	4	12	47	6	11	7	2	4	0	0	3	0	40	12	45	6	4	8	14	2
Otu01114	Bacteria	Planctomycetes	Planctomycetacia	Pirellulales	Pirellulaceae	Pirellulaceae_unclassified	624	0	5	2	2	15	5	8	24	20	13	15	24	12	27	23	16	8	1	3	6	3	1	6	1	3	3	1	18	9	13	3	0	0	0	4	1	5	2	1	10	3	3
Otu01115	Bacteria	Planctomycetes	Planctomycetacia	Pirellulales	Pirellulaceae	Pir4_lineage	993	0	0	0	0	1	13	35	102	58	87	26	27	10	138	7	40	5	0	0	5	8	7	8	14	1	7	3	25	12	54	12	0	0	0	0	2	0	3	4	18	1	0
Otu01116	Bacteria	Chloroflexi	JG30-KF-CM66	JG30-KF-CM66_or	JG30-KF-CM66_fa	JG30-KF-CM66_ge	515	9	28	15	16	7	9	12	7	26	16	12	1	2	9	3	3	3	14	8	9	2	3	8	7	2	11	0	8	0	5	1	1	1	0	5	6	2	1	2	2	3	4
Otu01117	Bacteria	Acidobacteria	Subgroup_5	Subgroup_5_or	Subgroup_5_fa	Subgroup_5_ge	771	0	4	2	0	2	3	30	37	78	37	3	1	12	32	32	67	5	0	5	0	3	8	6	4	4	3	5	29	7	21	20	0	0	0	0	1	3	4	2	10	2	1
Otu01118	Bacteria	Planctomycetes	Planctomycetacia	Isosphaerales	Isosphaeraceae	uncultured	200	63	14	6	1	1	4	0	0	5	0	4	0	0	0	2	0	0	10	2	0	0	0	1	1	0	0	0	0	0	0	0	0	0	15	1	0	0	0	0	0	0	0
Otu01119	Bacteria	Proteobacteria	Alphaproteobacteria	Rhizobiales	Hyphomicrobiaceae	Pedomicrobium	1623	1	31	28	2	94	130	106	56	119	81	29	38	2	3	6	3	8	1	14	51	54	16	23	43	2	25	7	0	0	0	1	0	3	9	7	74	16	4	3	4	2	7
Otu01120	Bacteria	Proteobacteria	Deltaproteobacteria	Desulfarculales	Desulfarculaceae	Desulfatiglans	776	0	0	0	0	2	1	0	0	0	0	2	2	0	0	1	3	1	0	0	1	0	0	0	0	0	4	0	12	0	41	2	41	159	0	0	0	0	0	10	2	6	68
Otu01121	Bacteria	Proteobacteria	Alphaproteobacteria	Rhodospirillales	Magnetospiraceae	uncultured	1731	0	0	0	0	0	0	0	0	4	10	7	6	25	95	130	276	25	0	0	0	0	0	0	0	5	1	62	123	31	117	54	10	3	0	0	0	0	1	42	91	34	35
Otu01122	Bacteria	Bacteria_unclassified	Bacteria_unclassified	Bacteria_unclassified	Bacteria_unclassified	Bacteria_unclassified	711	0	0	0	0	0	0	0	0	0	2	0	0	0	1	0	0	1	0	0	0	0	0	0	0	0	2	0	1	0	3	0	78	455	0	0	0	0	0	2	2	6	16
Otu01123	Bacteria	Actinobacteria	Thermoleophilia	Solirubrobacterales	Solirubrobacterales_unclassified	Solirubrobacterales_unclassified	512	30	65	11	3	7	11	18	7	11	2	10	2	0	0	1	0	1	20	24	14	4	6	8	5	1	1	0	0	0	0	1	0	1	9	9	7	4	0	0	0	0	1
Otu01124	Bacteria	Gemmatimonadetes	S0134_terrestrial_group	S0134_terrestrial_group_or	S0134_terrestrial_group_fa	S0134_terrestrial_group_ge	577	4	51	33	14	8	9	6	8	9	5	7	22	3	1	4	6	5	7	9	8	0	9	12	3	0	3	0	1	0	2	1	0	0	25	15	9	2	0	0	1	2	1
Otu01125	Bacteria	Proteobacteria	Alphaproteobacteria	Reyranellales	Reyranellaceae	uncultured	718	10	69	32	15	6	2	1	14	22	8	1	18	4	1	4	16	1	26	31	15	1	9	4	6	0	1	0	2	0	1	8	0	0	26	8	3	3	3	0	0	0	2
Otu01126	Bacteria	Chloroflexi	Chloroflexia	Thermomicrobiales	AKYG1722	AKYG1722_ge	1491	30	138	84	49	22	17	10	13	47	19	29	13	10	6	7	2	5	80	49	22	8	21	15	10	2	17	0	3	0	3	1	0	0	25	21	6	2	1	2	2	0	0
Otu01127	Bacteria	Chloroflexi	Anaerolineae	SBR1031	A4b	A4b_ge	1066	0	0	0	0	0	0	0	0	1	0	0	1	2	17	41	236	51	0	0	0	0	0	0	0	0	1	0	8	3	93	17	4	0	0	0	0	0	0	41	131	14	22
Otu01128	Bacteria	Proteobacteria	Alphaproteobacteria	Rhizobiales	KF-JG30-B3	KF-JG30-B3_ge	693	10	20	13	5	2	9	16	6	15	22	18	2	9	17	17	12	4	5	15	5	1	7	4	6	4	21	1	21	1	8	4	3	3	12	21	4	4	0	4	4	2	7
Otu01129	Bacteria	Proteobacteria	Deltaproteobacteria	Myxococcales	Polyangiaceae	Pajaroellobacter	340	50	19	6	6	6	5	4	0	4	0	12	3	3	1	4	1	1	12	7	0	1	1	6	2	2	0	3	1	0	1	2	2	6	17	3	1	0	2	1	2	1	0
Otu01130	Bacteria	Proteobacteria	Deltaproteobacteria	Desulfobacterales	Desulfobulbaceae	Desulfobulbaceae_unclassified	107	0	0	0	0	0	0	0	0	0	0	1	4	0	6	6	3	1	0	0	0	0	0	0	0	0	1	0	3	0	0	0	7	0	0	0	0	0	0	5	2	1	3
Otu01131	Bacteria	Chloroflexi	Anaerolineae	Caldilineales	Caldilineaceae	uncultured	311	13	11	4	3	0	3	3	4	18	11	6	4	5	3	4	0	3	12	0	1	1	6	6	1	0	4	2	5	1	5	1	0	1	8	3	1	2	1	1	2	1	1
Otu01132	Bacteria	Chloroflexi	Anaerolineae	Caldilineales	Caldilineaceae	uncultured	567	0	4	9	6	3	6	8	9	35	14	12	13	11	15	7	17	3	3	7	6	3	14	7	5	3	12	1	11	4	17	3	0	1	2	2	1	4	7	9	7	7	2
Otu01133	Bacteria	Bacteroidetes	Bacteroidia	Flavobacteriales	Flavobacteriaceae	Flavobacteriaceae_unclassified	792	0	0	0	0	0	0	0	0	1	18	13	57	30	20	43	15	2	0	0	0	0	0	0	1	5	9	2	25	9	102	2	1	2	0	0	0	1	1	23	5	0	3
Otu01134	Bacteria	Bacteroidetes	Bacteroidia	Flavobacteriales	Flavobacteriaceae	Ulvibacter	1923	0	0	0	1	13	29	27	22	30	29	73	102	53	28	198	16	9	0	1	10	2	4	6	6	45	77	1	25	6	38	3	2	1	0	0	2	1	11	37	53	2	6
Otu01135	Bacteria	Gemmatimonadetes	Gemmatimonadetes	Gemmatimonadales	Gemmatimonadaceae	uncultured	1700	0	0	0	0	0	0	0	0	0	2	0	0	6	225	173	307	3	0	0	0	0	0	0	0	0	2	5	102	27	172	16	0	1	0	0	0	0	0	37	55	3	40
Otu01136	Bacteria	Bacteroidetes	Bacteroidia	Chitinophagales	Chitinophagaceae	Terrimonas	926	98	89	24	4	2	12	0	0	3	5	16	14	2	0	0	3	1	48	28	2	2	2	2	4	0	2	1	9	0	10	11	0	4	86	8	2	3	1	3	1	3	1
Otu01137	Bacteria	Acidobacteria	Subgroup_22	Subgroup_22_or	Subgroup_22_fa	Subgroup_22_ge	536	0	1	3	0	0	2	0	5	12	16	37	30	9	1	3	2	10	0	2	0	0	1	3	0	9	34	7	0	0	1	1	1	6	0	1	5	5	6	0	0	2	1
Otu01138	Bacteria	Proteobacteria	Gammaproteobacteria	JTB23	JTB23_fa	JTB23_ge	925	0	1	0	0	1	1	3	7	66	63	68	28	43	27	48	23	13	0	0	2	0	0	5	0	8	28	1	63	2	21	3	0	2	0	0	1	4	10	8	7	1	4
Otu01139	Bacteria	Chloroflexi	Anaerolineae	Ardenticatenales	uncultured	uncultured_ge	306	0	1	2	1	0	0	3	3	2	9	9	16	13	13	18	13	1	0	0	2	0	2	2	1	0	9	0	2	0	2	0	0	1	0	1	0	3	0	1	4	1	1
Otu01140	Bacteria	Verrucomicrobia	Verrucomicrobiae	Pedosphaerales	Pedosphaeraceae	Pedosphaeraceae_ge	365	0	0	0	0	0	0	1	0	21	15	8	11	9	9	14	24	7	1	0	0	0	1	1	1	0	6	0	10	3	9	1	1	3	0	0	0	0	1	6	8	7	1
Otu01141	Bacteria	Actinobacteria	Actinobacteria_unclassified	Actinobacteria_unclassified	Actinobacteria_unclassified	Actinobacteria_unclassified	1004	3	18	11	37	0	3	70	49	69	21	5	22	32	2	4	0	18	0	9	5	5	16	19	7	3	26	11	19	0	0	0	1	3	4	22	1	9	14	2	1	2	1
Otu01142	Bacteria	Acidobacteria	Acidobacteriia	Subgroup_2	Subgroup_2_fa	Subgroup_2_ge	564	0	0	0	0	0	0	0	0	17	47	9	3	3	4	2	0	21	0	0	0	0	0	4	5	10	0	10	5	0	5	3	26	34	0	0	0	0	1	0	1	11	57
Otu01143	Bacteria	Acidobacteria	Blastocatellia_(Subgroup_4)	Blastocatellales	Blastocatellaceae	Blastocatella	747	129	66	10	0	4	7	0	0	6	0	8	0	1	0	3	0	1	25	12	3	0	0	0	0	0	0	0	0	0	0	1	0	0	166	10	0	2	1	0	0	1	0
Otu01144	Bacteria	Proteobacteria	Alphaproteobacteria	Rhodobacterales	Rhodobacteraceae	Rubellimicrobium	1693	8	1	0	1	0	1	0	0	2	0	3	0	1	0	1	0	2	15	17	0	1	0	3	65	0	0	1	0	0	0	45	0	2	2	2	1	0	0	0	1	1	0
Otu01145	Bacteria	Chloroflexi	Anaerolineae	Anaerolineales	Anaerolineaceae	uncultured	484	0	0	0	2	1	1	7	12	24	14	10	8	6	18	22	36	3	0	0	1	0	3	1	0	3	8	1	4	2	17	3	10	20	0	0	1	0	0	6	9	4	18
Otu01146	Bacteria	Proteobacteria	Gammaproteobacteria	Legionellales	Legionellaceae	Legionella	284	5	13	2	1	1	1	6	0	2	2	3	6	0	2	0	0	0	5	10	3	5	1	2	5	1	0	0	0	1	1	2	16	24	2	3	0	0	0	0	0	1	0
Otu01147	Bacteria	Actinobacteria	Acidimicrobiia	IMCC26256	IMCC26256_fa	IMCC26256_ge	1509	0	0	0	0	0	1	65	20	67	120	46	87	22	170	37	115	12	0	0	0	7	6	16	4	7	5	3	34	29	57	28	3	0	0	1	31	3	2	26	83	9	6
Otu01148	Bacteria	Proteobacteria	Deltaproteobacteria	Syntrophobacterales	Syntrophaceae	Desulfobacca	1045	0	0	1	0	0	0	0	0	0	0	1	0	0	0	0	1	0	0	0	0	0	0	0	0	0	2	0	29	0	59	0	6	292	0	0	0	0	0	11	8	6	18
Otu01149	Bacteria	Firmicutes	Clostridia	Clostridiales	Clostridiaceae_1	Fonticella	271	0	0	0	0	0	0	1	3	6	5	7	15	5	5	5	3	4	6	1	3	1	4	0	3	3	6	0	3	1	3	1	4	9	0	7	0	3	1	0	0	1	0
Otu01150	Bacteria	Chloroflexi	Anaerolineae	SBR1031	A4b	A4b_ge	1188	0	0	0	0	0	0	0	2	16	33	10	50	31	124	67	91	17	0	0	0	0	1	4	0	7	4	3	46	8	93	15	2	4	0	0	0	0	0	26	49	8	23
Otu01151	Bacteria	Gemmatimonadetes	Gemmatimonadetes	Gemmatimonadales	Gemmatimonadaceae	Gemmatimonas	601	97	22	10	0	2	8	10	5	13	12	31	4	5	1	1	9	2	35	8	2	7	1	4	11	0	0	0	1	0	2	6	0	0	62	11	2	0	0	0	2	0	3
Otu01152	Bacteria	Proteobacteria	Alphaproteobacteria	Rhizobiales	Devosiaceae	Devosia	621	78	26	14	0	0	2	0	1	3	3	11	1	1	0	5	4	7	58	11	4	0	2	0	4	0	0	0	0	1	0	3	0	15	21	5	0	1	0	3	0	6	0
Otu01153	Bacteria	Planctomycetes	Phycisphaerae	Phycisphaerales	Phycisphaeraceae	uncultured	568	0	4	2	5	1	4	6	23	27	24	10	21	9	48	3	4	3	0	4	2	3	7	8	6	3	31	0	0	0	0	1	0	0	0	5	0	8	7	7	8	1	32
Otu01154	Bacteria	Actinobacteria	Actinobacteria	Propionibacteriales	Nocardioidaceae	Kribbella	1129	184	146	56	17	1	71	0	3	12	4	31	2	3	0	4	0	3	28	21	3	1	3	1	3	0	4	0	0	0	1	3	0	4	69	37	3	1	0	5	3	0	0
Otu01155	Bacteria	Proteobacteria	Deltaproteobacteria	Myxococcales	Haliangiaceae	Haliangium	1717	18	257	151	34	58	74	18	8	34	3	3	5	4	0	4	3	2	17	35	81	27	13	3	24	0	1	0	1	0	2	2	0	7	25	54	26	1	1	1	1	3	1
Otu01156	Bacteria	Firmicutes	Clostridia	Clostridiales	Ruminococcaceae	Ruminococcaceae_unclassified	236	0	0	0	0	6	8	0	1	1	1	11	14	14	16	5	2	0	0	3	6	0	5	3	2	1	13	7	0	3	1	3	0	3	1	0	1	3	2	0	0	0	3
Otu01157	Bacteria	Bacteroidetes	Bacteroidia	Chitinophagales	Saprospiraceae	uncultured	1187	0	0	0	0	0	0	11	6	54	105	27	3	2	59	66	61	9	0	0	0	0	0	6	4	35	1	13	85	20	54	26	1	3	0	0	0	0	9	9	4	4	2
Otu01158	Bacteria	Actinobacteria	Thermoleophilia	Solirubrobacterales	67-14	67-14_ge	336	0	0	5	13	1	8	16	29	26	29	11	3	0	11	4	3	0	1	2	1	3	2	4	0	3	1	3	5	2	2	3	0	0	0	1	1	0	0	0	0	0	14
Otu01159	Bacteria	Bacteroidetes	Bacteroidia	Chitinophagales	37-13	37-13_ge	647	0	1	4	6	1	2	14	3	12	23	15	10	13	28	25	25	7	0	2	1	3	5	3	3	4	9	7	28	11	22	0	0	1	0	7	0	7	2	10	14	3	2
Otu01160	Bacteria	Chloroflexi	Anaerolineae	Caldilineales	Caldilineaceae	uncultured	655	5	14	8	1	5	7	12	10	29	18	22	18	7	12	14	3	1	9	7	8	6	3	7	6	1	15	2	15	6	21	2	2	0	11	4	4	0	2	6	11	4	4
Otu01161	Bacteria	Hydrogenedentes	Hydrogenedentia	Hydrogenedentiales	Hydrogenedensaceae	Hydrogenedensaceae_ge	407	0	0	0	1	0	2	7	0	5	6	17	14	8	10	5	11	3	0	0	0	1	2	3	0	7	27	2	19	4	18	0	0	1	0	2	3	1	0	7	11	2	9
Otu01162	Bacteria	Proteobacteria	Deltaproteobacteria	NB1-j	NB1-j_fa	NB1-j_ge	555	0	0	0	0	0	0	0	0	1	6	5	9	5	14	19	9	13	0	0	0	0	0	0	1	0	4	10	14	4	14	2	2	7	0	0	0	0	2	11	9	10	66
Otu01163	Bacteria	Bacteroidetes	Bacteroidia	Sphingobacteriales	Sphingobacteriales_unclassified	Sphingobacteriales_unclassified	628	2	93	88	26	24	9	16	14	28	3	4	3	0	0	5	9	6	3	16	3	4	6	1	6	0	0	0	0	0	1	2	0	1	14	11	5	2	1	0	0	0	1
Otu01164	Bacteria	Gemmatimonadetes	BD2-11_terrestrial_group	BD2-11_terrestrial_group_or	BD2-11_terrestrial_group_fa	BD2-11_terrestrial_group_ge	841	0	1	3	1	13	6	15	12	24	26	32	39	20	38	14	34	6	0	1	6	2	8	12	2	4	15	9	16	3	29	3	7	5	0	0	9	5	4	11	26	12	6
Otu01165	Bacteria	Proteobacteria	Deltaproteobacteria	Myxococcales	bacteriap25	bacteriap25_ge	935	0	11	16	9	19	10	17	18	120	34	17	23	15	10	1	0	10	0	7	28	13	11	17	17	1	13	18	21	3	2	2	0	1	0	10	14	16	4	2	2	1	2
Otu01166	Bacteria	Proteobacteria	Alphaproteobacteria	Rhizobiales	Hyphomicrobiaceae	Pedomicrobium	807	0	0	2	1	0	0	4	12	44	41	26	27	20	43	18	1	13	0	0	0	0	5	1	2	8	9	17	62	11	8	2	9	13	0	0	1	1	4	10	2	4	22
Otu01167	Bacteria	Chloroflexi	Anaerolineae	Anaerolineales	Anaerolineaceae	uncultured	554	0	0	0	1	0	0	0	1	4	4	6	2	6	8	6	5	15	1	1	0	0	2	0	2	4	2	0	5	0	12	2	31	16	0	4	0	0	0	2	4	21	7
Otu01168	Bacteria	Acidobacteria	Holophagae	Subgroup_7	Subgroup_7_fa	Subgroup_7_ge	471	40	6	0	2	0	5	6	14	13	13	18	8	2	2	0	1	4	7	5	1	5	3	7	4	0	2	2	2	1	0	3	0	9	43	5	2	23	0	0	0	1	0
Otu01169	Archaea	Crenarchaeota	Bathyarchaeia	Bathyarchaeia_or	Bathyarchaeia_fa	Bathyarchaeia_ge	571	0	0	0	0	0	0	0	0	0	1	0	0	0	0	2	13	8	0	0	0	0	0	0	0	0	2	0	10	0	30	0	23	68	0	0	0	0	0	1	1	11	96
Otu01170	Bacteria	Proteobacteria	Gammaproteobacteria	Betaproteobacteriales	Rhodocyclaceae	Azoarcus	677	2	27	33	46	6	6	4	34	41	10	1	4	3	2	5	3	7	6	5	9	6	10	24	25	3	2	0	0	0	0	2	0	0	2	20	5	25	3	1	3	0	3
Otu01171	Bacteria	Planctomycetes	OM190	OM190_or	OM190_fa	OM190_ge	616	0	20	20	20	3	4	9	0	7	30	14	10	15	23	15	8	8	2	6	0	1	1	0	2	9	30	7	6	0	20	9	3	1	0	8	0	1	0	2	7	2	0
Otu01172	Bacteria	Bacteroidetes	Bacteroidia	Sphingobacteriales	AKYH767	AKYH767_ge	563	8	17	8	1	7	13	25	7	15	20	30	16	5	14	15	21	8	2	3	2	3	1	3	2	0	4	2	10	0	15	3	2	1	1	1	2	4	2	4	1	6	3
Otu01173	Bacteria	Chloroflexi	Dehalococcoidia	SAR202_clade	SAR202_clade_fa	SAR202_clade_ge	402	0	1	2	3	1	0	3	15	32	23	12	10	13	12	6	9	7	1	0	1	2	6	14	1	6	14	6	12	3	5	1	0	0	0	4	2	7	3	2	0	0	1
Otu01174	Bacteria	Actinobacteria	Thermoleophilia	Thermoleophilia_unclassified	Thermoleophilia_unclassified	Thermoleophilia_unclassified	679	13	54	62	21	35	20	25	12	28	10	1	8	0	2	5	0	1	5	16	29	9	5	3	13	0	2	0	5	1	0	1	0	1	4	9	5	3	0	0	0	0	0
Otu01175	Bacteria	Chloroflexi	Anaerolineae	Caldilineales	Caldilineaceae	uncultured	323	0	0	2	6	0	1	4	6	19	12	9	16	7	15	17	10	2	0	0	2	2	6	4	4	3	3	2	7	3	6	3	0	1	0	1	0	1	1	6	10	5	11
Otu01176	Bacteria	Planctomycetes	Planctomycetacia	Pirellulales	Pirellulaceae	Rhodopirellula	354	0	3	8	6	1	3	4	7	43	14	7	3	0	0	0	0	1	0	6	4	3	16	25	11	2	1	4	0	0	0	0	0	0	0	4	4	8	1	0	0	2	1
Otu01177	Bacteria	Bacteroidetes	Bacteroidia	Chitinophagales	Saprospiraceae	uncultured	1706	0	35	189	109	54	50	21	36	31	2	6	10	4	5	8	71	54	4	30	38	16	18	12	8	2	2	0	1	1	4	2	1	6	0	57	25	18	5	1	3	7	3
Otu01178	Bacteria	Bacteroidetes	Bacteroidia	Flavobacteriales	Flavobacteriaceae	Hoppeia	148	0	0	0	0	0	0	0	0	0	0	1	3	4	4	7	54	2	0	0	0	0	0	0	0	0	5	0	2	0	10	0	0	0	0	0	0	0	0	0	1	2	0
Otu01179	Bacteria	Actinobacteria	Actinobacteria	Frankiales	Nakamurellaceae	Nakamurella	1179	6	56	93	130	1	4	1	8	14	3	15	24	13	0	3	0	17	6	21	0	4	12	3	1	6	107	2	0	12	6	3	60	0	5	13	11	3	0	5	2	7	1
Otu01180	Bacteria	Planctomycetes	Planctomycetacia	Pirellulales	Pirellulaceae	Rhodopirellula	547	0	1	0	3	1	4	17	21	26	17	9	11	2	15	22	20	8	0	0	1	1	5	10	8	2	2	3	5	4	19	34	10	10	0	0	3	0	0	4	10	10	8
Otu01181	Bacteria	Chloroflexi	Anaerolineae	SBR1031	A4b	A4b_ge	361	1	32	4	3	2	1	2	1	4	1	6	5	1	0	0	0	1	12	11	4	0	0	0	0	0	2	0	0	0	1	1	0	2	17	7	1	2	0	0	0	0	1
Otu01182	Bacteria	Proteobacteria	Deltaproteobacteria	Desulfobacterales	Desulfobulbaceae	Desulfurivibrio	106	0	0	0	0	0	0	0	0	0	0	1	0	1	2	3	1	0	0	0	0	0	0	0	0	0	1	0	15	1	4	0	2	0	0	0	0	0	0	9	5	1	2
Otu01183	Bacteria	Proteobacteria	Deltaproteobacteria	Desulfobacterales	Desulfobulbaceae	uncultured	646	0	0	0	0	0	0	0	0	4	0	0	1	6	2	0	4	5	0	0	0	0	0	0	5	0	0	0	3	9	12	1	6	3	0	0	0	0	2	1	2	40	15
Otu01184	Bacteria	Acidobacteria	Subgroup_6	Subgroup_6_or	Subgroup_6_fa	Subgroup_6_ge	320	14	16	10	3	2	7	7	2	17	3	4	2	3	6	4	2	4	6	3	1	0	1	3	2	4	0	1	4	0	4	1	0	0	7	9	3	5	5	0	0	0	1
Otu01185	Bacteria	Proteobacteria	Deltaproteobacteria	MBNT15	MBNT15_fa	MBNT15_ge	752	0	0	0	0	0	0	2	5	27	42	47	10	14	7	4	1	13	0	0	0	0	2	5	4	17	15	0	6	1	7	1	73	41	0	1	0	9	9	6	4	12	19
Otu01186	Bacteria	Proteobacteria	Deltaproteobacteria	Syntrophobacterales	Syntrophaceae	Syntrophus	479	0	0	0	0	0	0	0	0	0	0	0	1	0	0	0	1	0	0	0	0	0	0	0	0	0	1	0	15	0	27	0	8	64	0	0	0	0	0	6	4	3	61
Otu01187	Bacteria	Proteobacteria	Alphaproteobacteria	Rhizobiales	Rhizobiales_Incertae_Sedis	Bauldia	634	0	0	0	0	0	0	9	13	43	44	19	59	17	14	29	18	5	0	0	1	1	7	8	4	5	6	1	11	6	16	7	5	0	0	0	0	0	3	9	24	6	7
Otu01188	Bacteria	Proteobacteria	Alphaproteobacteria	Rhizobiales	Xanthobacteraceae	uncultured	1429	12	27	16	0	7	2	4	5	11	38	61	17	22	108	18	90	20	16	11	3	0	1	5	2	2	22	3	30	13	32	2	0	6	7	1	0	1	3	11	51	38	164
Otu01189	Bacteria	Proteobacteria	Alphaproteobacteria	Rhizobiales	Xanthobacteraceae	Xanthobacteraceae_unclassified	483	27	21	10	2	1	8	1	4	17	12	10	4	6	6	8	29	4	16	6	1	2	1	3	1	0	14	1	12	1	3	0	8	20	0	6	1	1	1	1	17	7	5
Otu01190	Bacteria	Chloroflexi	Anaerolineae	Ardenticatenales	uncultured	uncultured_ge	992	1	13	14	19	1	0	21	21	33	28	52	23	43	17	26	2	24	1	6	2	6	27	8	8	5	12	14	9	0	20	1	3	9	0	8	6	6	11	9	3	4	6
Otu01191	Bacteria	Chloroflexi	Anaerolineae	Ardenticatenales	uncultured	uncultured_ge	968	0	0	5	0	0	2	22	17	49	21	34	52	32	52	41	46	9	0	0	0	0	6	5	4	5	12	3	33	4	55	0	0	1	0	0	0	0	1	16	8	3	6
Otu01192	Bacteria	Gemmatimonadetes	Gemmatimonadetes	Gemmatimonadales	Gemmatimonadaceae	Gemmatimonas	674	170	25	8	0	1	20	0	0	4	5	65	0	2	0	2	3	3	31	14	2	0	1	0	3	0	0	0	0	0	0	4	0	1	75	9	0	1	0	1	3	0	0
Otu01193	Bacteria	Gemmatimonadetes	Gemmatimonadetes	Gemmatimonadales	Gemmatimonadaceae	uncultured	191	7	22	4	1	1	2	2	6	5	3	1	2	1	1	3	5	2	6	2	4	0	1	1	0	1	4	1	5	2	5	2	1	0	0	1	0	0	0	0	15	4	1
Otu01194	Bacteria	Planctomycetes	Planctomycetacia	Pirellulales	Pirellulaceae	Pirellula	793	0	4	4	16	2	16	38	49	53	30	15	17	4	29	24	8	1	0	1	2	10	23	18	12	2	7	7	22	8	10	4	0	1	0	3	0	3	8	4	4	2	0
Otu01195	Bacteria	Firmicutes	Clostridia	Clostridiales	Ruminococcaceae	Ruminococcaceae_unclassified	381	0	0	0	1	8	6	1	7	8	10	5	13	8	9	62	18	5	2	2	3	0	3	2	1	2	8	13	6	5	7	7	4	14	0	1	3	4	1	1	2	2	2
Otu01196	Bacteria	Proteobacteria	Alphaproteobacteria	Rhizobiales	Rhizobiales_unclassified	Rhizobiales_unclassified	546	6	13	17	5	3	1	2	2	1	6	55	20	11	3	9	21	11	3	3	0	0	2	3	0	10	30	3	3	1	1	3	1	5	5	14	2	4	0	1	1	1	5
Otu01197	Bacteria	Proteobacteria	Alphaproteobacteria	Rhizobiales	Xanthobacteraceae	Xanthobacteraceae_unclassified	103	0	0	0	0	0	0	0	0	6	4	4	2	3	3	0	2	1	0	0	0	0	0	3	0	1	2	0	6	1	4	0	0	1	0	0	0	0	0	6	3	2	7
Otu01198	Bacteria	Actinobacteria	MB-A2-108	MB-A2-108_or	MB-A2-108_fa	MB-A2-108_ge	643	10	24	8	4	5	5	32	24	22	20	14	10	6	4	2	0	1	16	9	4	12	13	5	12	1	16	9	4	0	1	1	0	1	4	5	6	7	15	3	1	2	1
Otu01199	Bacteria	Planctomycetes	Planctomycetacia	Gemmatales	Gemmataceae	Gemmata	652	10	15	9	2	9	4	11	16	27	35	11	24	5	14	5	4	1	23	6	7	10	22	18	9	5	11	13	3	4	0	0	0	1	9	5	5	7	9	3	2	0	0
Otu01200	Bacteria	Actinobacteria	Actinobacteria	Propionibacteriales	Nocardioidaceae	Nocardioides	775	40	79	56	22	0	6	4	10	15	6	9	0	0	0	1	0	1	20	39	7	7	11	9	3	0	1	1	0	1	0	0	0	1	21	20	5	2	0	1	0	0	0
Otu01201	Bacteria	Proteobacteria	Alphaproteobacteria	Rhodovibrionales	Kiloniellaceae	Tagaea	1216	1	11	7	7	37	39	22	20	39	47	19	36	18	36	36	79	3	1	7	21	10	10	10	5	12	8	0	25	8	39	4	2	0	2	6	12	5	4	5	10	3	18
Otu01202	Bacteria	Latescibacteria	Latescibacteria_cl	Latescibacteria_or	Latescibacteria_fa	Latescibacteria_ge	1294	0	0	0	0	0	0	0	0	6	72	13	10	22	103	63	139	13	0	0	0	0	1	1	0	1	9	10	83	79	88	41	4	2	0	0	0	1	2	25	37	12	4
Otu01203	Bacteria	Actinobacteria	WCHB1-81	WCHB1-81_or	WCHB1-81_fa	WCHB1-81_ge	672	0	0	0	0	0	0	0	0	0	1	0	0	0	0	0	2	0	0	0	0	0	0	0	0	0	3	0	12	0	20	0	34	96	0	0	0	0	0	4	6	9	89
Otu01204	Bacteria	Planctomycetes	Planctomycetacia	Planctomycetales	uncultured	uncultured_ge	1020	0	0	11	4	42	33	31	22	40	46	39	27	25	32	17	5	1	1	3	13	21	5	10	12	9	21	17	16	5	18	0	0	1	0	6	8	4	3	4	6	2	11
Otu01205	Bacteria	Chloroflexi	Chloroflexia	Thermomicrobiales	JG30-KF-CM45	JG30-KF-CM45_ge	537	92	28	10	1	1	4	0	2	21	4	22	1	2	0	0	0	1	37	25	3	2	12	0	4	1	1	0	0	0	0	6	0	4	25	4	1	0	0	0	1	0	0
Otu01206	Bacteria	Proteobacteria	Gammaproteobacteria	Gammaproteobacteria_unclassified	Gammaproteobacteria_unclassified	Gammaproteobacteria_unclassified	454	0	0	15	1	9	10	11	1	5	1	7	10	1	11	1	12	26	2	1	3	2	1	3	3	1	0	1	1	3	1	0	102	31	1	0	0	0	1	6	6	12	18
Otu01207	Bacteria	Acidobacteria	Thermoanaerobaculia	Thermoanaerobaculales	Thermoanaerobaculaceae	Subgroup_10	1147	0	0	0	0	0	0	0	6	30	103	9	57	48	7	4	0	13	0	0	0	1	0	0	7	23	16	89	95	18	4	0	1	1	0	0	1	43	119	4	6	4	2
Otu01208	Bacteria	Planctomycetes	Phycisphaerae	Phycisphaerales	Phycisphaeraceae	uncultured	1144	0	0	0	0	1	0	2	3	9	25	28	39	23	22	12	29	31	0	0	0	0	0	0	0	6	30	7	21	7	60	7	42	3	0	0	1	1	4	5	20	31	3
Otu01209	Bacteria	Actinobacteria	Actinobacteria	Pseudonocardiales	Pseudonocardiaceae	Actinophytocola	1355	247	212	101	15	32	27	49	69	134	2	9	0	1	0	5	1	11	12	34	24	2	1	0	2	0	0	0	0	0	0	0	0	3	16	24	1	2	0	2	1	0	0
Otu01210	Bacteria	Acidobacteria	Acidobacteriia	Solibacterales	Solibacteraceae_(Subgroup_3)	Solibacteraceae_(Subgroup_3)_unclassified	513	0	0	0	0	0	0	0	5	10	5	1	4	6	19	19	35	6	0	0	0	1	8	17	6	4	6	5	38	3	13	11	2	6	0	0	3	5	5	1	9	21	8
Otu01211	Bacteria	Chlamydiae	Chlamydiae	Chlamydiales	Simkaniaceae	Simkaniaceae_unclassified	490	0	0	0	0	0	0	0	0	0	1	0	0	0	0	0	4	10	0	0	0	0	0	0	0	0	1	0	3	0	8	0	262	98	0	0	0	0	0	7	7	17	7
Otu01212	Bacteria	Actinobacteria	Actinobacteria	Propionibacteriales	Nocardioidaceae	Nocardioides	732	32	58	33	23	8	6	12	11	19	3	10	10	1	0	1	2	1	29	20	10	13	10	7	14	0	0	2	0	0	1	0	0	7	9	18	20	2	1	2	1	1	0
Otu01213	Bacteria	Proteobacteria	Alphaproteobacteria	Alphaproteobacteria_unclassified	Alphaproteobacteria_unclassified	Alphaproteobacteria_unclassified	1346	0	0	0	1	1	1	0	1	2	1	0	0	2	76	54	33	27	0	1	0	0	1	4	1	0	1	0	52	68	251	22	32	11	0	1	0	0	0	18	42	144	10
Otu01214	Bacteria	Proteobacteria	Gammaproteobacteria	PLTA13	PLTA13_fa	PLTA13_ge	415	2	3	3	0	0	1	0	0	7	3	5	261	20	2	0	2	0	1	1	1	0	0	1	1	2	7	1	2	0	0	2	0	0	7	0	0	1	1	4	0	5	0
Otu01215	Bacteria	Gemmatimonadetes	Gemmatimonadetes	Gemmatimonadales	Gemmatimonadaceae	Gemmatimonas	1486	321	171	28	4	1	16	0	1	15	1	33	0	4	0	2	3	3	81	23	11	1	0	1	2	0	0	0	0	0	0	1	0	1	165	9	0	0	0	3	0	1	0
Otu01216	Bacteria	Chloroflexi	JG30-KF-CM66	JG30-KF-CM66_or	JG30-KF-CM66_fa	JG30-KF-CM66_ge	1086	0	0	0	0	0	0	0	3	9	22	8	4	6	61	58	270	19	0	0	0	0	1	0	0	2	6	4	16	23	79	19	3	7	0	1	1	0	2	23	47	9	64
Otu01217	Bacteria	Chloroflexi	Anaerolineae	Anaerolineales	Anaerolineaceae	uncultured	695	0	24	39	18	4	7	10	23	31	12	12	4	5	10	10	46	6	0	8	6	8	31	12	6	1	3	0	6	2	3	0	0	1	0	12	3	2	2	6	5	10	4
Otu01218	Bacteria	Planctomycetes	Phycisphaerae	Tepidisphaerales	WD2101_soil_group	WD2101_soil_group_ge	840	146	42	9	0	0	12	0	0	7	0	18	0	2	0	2	0	1	41	18	3	0	3	0	1	0	2	1	0	1	0	1	0	0	108	10	0	4	0	0	1	1	0
Otu01219	Bacteria	Actinobacteria	Acidimicrobiia	Microtrichales	uncultured	uncultured_ge	103	0	0	1	11	1	0	1	1	4	1	3	5	7	0	1	0	5	0	1	2	0	1	0	0	0	14	0	2	0	0	0	0	0	0	0	0	1	0	0	1	0	0
Otu01220	Bacteria	Proteobacteria	Gammaproteobacteria	Oceanospirillales	Nitrincolaceae	Motiliproteus	978	0	0	1	1	0	3	2	6	21	12	14	4	8	30	121	15	10	0	0	1	0	1	0	0	4	1	1	24	3	155	6	5	3	0	0	0	0	1	20	51	12	7
Otu01221	Bacteria	Nitrospirae	Nitrospira	Nitrospirales	Nitrospiraceae	Leptospirillum	3369	0	0	0	0	0	0	0	1	12	40	73	121	164	66	130	95	205	0	0	0	0	1	4	4	18	29	262	102	36	97	33	18	71	0	0	0	1	17	18	28	54	49
Otu01222	Bacteria	Rokubacteria	NC10	Rokubacteriales	Rokubacteriales_fa	Rokubacteriales_ge	114	0	2	2	1	2	2	2	3	9	0	3	1	1	0	6	0	5	0	0	1	0	1	1	0	1	1	0	4	0	1	1	0	0	0	4	1	4	0	1	1	4	1
Otu01223	Bacteria	Chloroflexi	Chloroflexia	Thermomicrobiales	JG30-KF-CM45	JG30-KF-CM45_ge	740	69	63	19	1	6	7	0	1	8	0	9	0	1	0	2	1	1	114	30	9	2	12	0	7	0	0	0	0	1	0	1	0	1	21	12	1	0	0	0	0	2	0
Otu01224	Bacteria	Proteobacteria	Deltaproteobacteria	Desulfobacterales	Desulfobulbaceae	uncultured	1254	0	0	0	0	0	0	0	0	3	3	7	8	16	63	29	51	8	0	0	0	0	0	0	2	0	11	2	15	30	67	4	12	2	0	0	0	0	1	33	35	142	8
Otu01225	Bacteria	Bacteroidetes	Bacteroidia	Bacteroidales	Paludibacteraceae	Paludibacter	417	1	0	0	0	0	0	0	3	3	0	0	0	0	1	0	1	1	7	2	5	0	0	0	0	0	0	0	2	0	0	1	0	0	28	38	1	8	4	10	36	10	23
Otu01226	Bacteria	Planctomycetes	Phycisphaerae	Phycisphaerales	Phycisphaeraceae	uncultured	368	0	3	0	0	25	12	5	9	18	9	10	24	2	10	6	3	9	0	2	8	0	0	3	0	0	15	0	4	3	5	0	2	2	0	0	5	2	1	1	8	1	4
Otu01227	Bacteria	Chloroflexi	JG30-KF-CM66	JG30-KF-CM66_or	JG30-KF-CM66_fa	JG30-KF-CM66_ge	920	0	9	18	25	12	10	20	43	60	21	18	23	9	10	22	19	10	0	4	10	7	4	12	2	5	24	0	14	2	20	1	7	8	0	14	5	7	8	1	6	8	8
Otu01228	Bacteria	Nitrospirae	Nitrospira	Nitrospirales	Nitrospiraceae	Nitrospira	626	0	0	0	0	0	0	1	0	2	6	2	7	5	9	6	58	2	0	0	0	0	0	0	1	2	4	8	12	0	14	12	4	22	0	0	0	1	0	4	2	3	44
Otu01229	Archaea	Nanoarchaeaeota	Woesearchaeia	Woesearchaeia_or	Woesearchaeia_fa	Woesearchaeia_ge	2053	0	0	0	0	0	0	0	0	0	1	1	0	0	0	0	0	0	0	0	0	0	0	0	0	0	7	0	16	0	26	0	652	579	0	0	0	0	0	7	14	7	6
Otu01230	Bacteria	Proteobacteria	Alphaproteobacteria	Sphingomonadales	Sphingomonadaceae	Sphingomonas	217	33	14	3	1	0	9	0	1	8	3	9	1	1	1	6	14	2	16	7	0	0	0	0	0	0	0	0	0	1	1	2	0	0	4	1	1	0	1	0	0	1	0
Otu01231	Bacteria	Planctomycetes	Pla3_lineage	Pla3_lineage_or	Pla3_lineage_fa	Pla3_lineage_ge	1459	0	0	40	29	58	18	45	22	49	45	58	96	37	89	30	24	17	0	4	7	3	9	5	10	11	14	5	35	5	33	20	0	2	0	15	8	8	15	16	13	3	8
Otu01232	Bacteria	Chloroflexi	Anaerolineae	SBR1031	A4b	OLB13	800	59	35	18	6	3	9	0	0	4	0	8	0	1	0	2	2	2	173	19	9	0	7	1	6	0	0	0	0	0	0	6	0	0	77	8	3	3	1	2	0	0	0
Otu01233	Bacteria	Proteobacteria	Deltaproteobacteria	Syntrophobacterales	Syntrophaceae	Desulfomonile	304	0	0	0	0	0	0	0	0	0	0	0	1	0	2	1	1	2	0	0	0	0	0	0	0	0	0	0	5	0	7	0	54	24	0	0	0	0	0	1	4	9	5
Otu01234	Bacteria	Firmicutes	Clostridia	Clostridiales	Ruminococcaceae	Sporobacter	325	1	1	0	0	1	5	0	1	3	12	3	5	3	8	0	1	0	10	3	0	0	2	1	0	3	5	2	2	2	17	0	2	10	7	9	3	0	4	3	37	8	7
Otu01235	Bacteria	Omnitrophicaeota	Omnitrophicaeota_cl	Omnitrophicaeota_or	Omnitrophicaeota_fa	Omnitrophicaeota_ge	298	0	0	0	0	0	8	18	12	36	25	4	0	1	5	2	3	1	0	0	2	1	4	15	5	3	0	0	4	0	1	1	0	0	0	1	0	0	2	0	1	0	3
Otu01236	Bacteria	Proteobacteria	Deltaproteobacteria	Myxococcales	Sandaracinaceae	Sandaracinus	788	0	3	1	5	4	2	13	29	88	75	16	5	15	29	20	2	6	0	3	2	3	13	20	14	17	8	2	36	14	4	2	0	2	0	12	2	7	2	2	2	1	1
Otu01237	Bacteria	Proteobacteria	Deltaproteobacteria	Myxococcales	Archangiaceae	Anaeromyxobacter	124	0	4	1	0	0	0	1	2	0	0	1	0	1	3	2	0	0	0	0	0	1	0	1	0	0	3	3	2	0	4	0	1	5	0	0	0	0	0	2	0	14	2
Otu01238	Bacteria	Chloroflexi	Anaerolineae	Anaerolineales	Anaerolineaceae	Anaerolineaceae_unclassified	814	0	0	0	0	0	0	0	0	0	3	0	0	0	0	0	0	2	0	0	0	0	0	0	0	0	2	0	16	0	46	0	29	333	0	0	0	0	0	6	3	0	5
Otu01239	Bacteria	Latescibacteria	Latescibacteria	Latescibacterales	Latescibacteraceae	Latescibacteraceae_ge	864	0	0	0	0	0	0	0	0	3	21	4	2	14	58	50	7	54	0	0	0	0	0	1	0	5	5	8	76	16	42	16	26	28	0	0	0	0	5	9	3	43	7
Otu01240	Bacteria	Dadabacteria	Dadabacteriia	Dadabacteriales	Dadabacteriales_fa	Dadabacteriales_ge	2114	0	0	0	0	0	0	0	0	3	15	1	1	1	1	12	46	2	0	0	0	0	0	0	0	2	1	0	4	9	11	49	1	3	0	0	0	0	0	7	27	58	76
Otu01241	Bacteria	Proteobacteria	Alphaproteobacteria	Tistrellales	Geminicoccaceae	Candidatus_Alysiosphaera	1050	2	0	0	2	0	0	1	7	22	18	15	48	70	43	158	3	2	1	0	0	0	5	5	4	10	7	20	18	6	13	0	1	0	1	2	0	1	8	14	11	3	27
Otu01242	Bacteria	Calditrichaeota	Calditrichia	Calditrichales	Calditrichaceae	JdFR-76	1891	0	0	0	0	0	0	0	0	0	17	14	32	31	227	158	157	10	0	0	0	0	0	0	0	1	10	6	115	34	55	13	0	6	0	0	0	0	2	34	62	7	352
Otu01243	Bacteria	Proteobacteria	Deltaproteobacteria	Myxococcales	Haliangiaceae	Haliangium	595	12	28	22	1	0	1	2	4	10	11	20	20	6	35	12	17	4	4	9	2	0	1	1	3	3	7	0	17	1	19	3	0	1	9	8	5	0	4	10	11	0	0
Otu01244	Bacteria	Proteobacteria	Gammaproteobacteria	Xanthomonadales	Rhodanobacteraceae	uncultured	744	83	50	63	19	11	19	1	12	6	0	0	2	0	0	2	0	2	28	35	36	5	4	4	3	1	0	0	0	0	0	0	0	1	35	14	4	1	3	0	0	0	0
Otu01245	Bacteria	Proteobacteria	Gammaproteobacteria	Xanthomonadales	Xanthomonadaceae	Arenimonas	785	131	49	15	6	2	14	1	0	11	2	30	2	4	1	5	7	2	25	10	3	1	0	1	0	1	0	1	0	0	1	1	0	0	72	16	2	1	0	2	1	2	2
Otu01246	Bacteria	Acidobacteria	Acidobacteriia	Solibacterales	Solibacteraceae_(Subgroup_3)	Bryobacter	993	3	15	4	4	59	23	35	15	25	10	17	55	27	0	3	0	7	7	2	45	11	8	11	18	3	22	43	2	0	4	0	0	3	18	3	28	4	25	0	3	1	2
Otu01247	Bacteria	Proteobacteria	Alphaproteobacteria	Rhizobiales	Xanthobacteraceae	Pseudorhodoplanes	449	32	45	17	7	3	7	2	11	7	0	10	0	1	0	1	1	0	20	14	3	1	0	3	1	0	4	0	1	0	0	2	1	1	22	8	1	1	1	0	0	0	11
Otu01248	Bacteria	Proteobacteria	Deltaproteobacteria	Desulfarculales	Desulfarculaceae	uncultured	803	3	8	0	0	0	0	0	4	11	15	15	25	8	45	46	51	46	14	8	2	0	2	0	0	0	6	2	15	2	26	5	5	24	40	2	0	2	2	13	7	7	1
Otu01249	Bacteria	Proteobacteria	Alphaproteobacteria	Sneathiellales	Sneathiellaceae	Sneathiella	1206	0	0	0	0	0	0	0	0	1	16	23	72	42	139	53	42	7	0	0	0	0	0	0	0	2	4	0	43	8	49	1	1	1	0	0	1	0	1	22	86	15	12
Otu01250	Bacteria	Firmicutes	Clostridia	Clostridiales	Ruminococcaceae	Ruminococcaceae_unclassified	327	0	0	2	0	1	2	3	8	9	6	8	7	8	13	28	1	2	1	0	0	0	2	3	2	3	5	12	4	7	13	8	0	15	0	0	2	4	3	0	3	5	1
Otu01251	Bacteria	Acidobacteria	Subgroup_6	Unknown_Order	Unknown_Family	Luteitalea	838	50	93	95	26	21	10	1	2	6	2	6	1	2	0	2	1	0	50	23	24	2	4	7	13	0	0	0	0	1	0	25	1	1	19	9	4	1	1	0	1	0	0
Otu01252	Bacteria	Chloroflexi	Chloroflexia	Thermomicrobiales	JG30-KF-CM45	JG30-KF-CM45_ge	925	66	54	33	5	3	11	2	3	16	2	6	0	2	2	2	0	2	112	58	13	5	3	2	9	0	0	0	0	1	0	1	0	1	34	13	2	1	2	2	1	1	0
Otu01253	Bacteria	Bacteroidetes	Bacteroidia	Chitinophagales	uncultured	uncultured_ge	561	0	0	0	0	0	0	5	0	5	11	13	12	16	34	30	29	3	0	0	0	1	3	0	1	1	9	2	44	0	29	0	0	4	0	0	0	0	0	15	24	5	3
Otu01254	Bacteria	Bacteroidetes	Bacteroidia	Bacteroidales	Bacteroidales_unclassified	Bacteroidales_unclassified	603	0	0	0	0	0	0	0	0	2	3	1	4	3	43	6	13	3	0	0	0	0	0	0	0	1	2	0	5	4	7	2	58	102	0	0	0	0	2	3	3	8	10
Otu01255	Bacteria	Proteobacteria	Deltaproteobacteria	Desulfobacterales	Desulfobulbaceae	uncultured	101	0	0	0	0	0	0	0	0	0	0	0	0	0	0	3	11	31	0	0	0	0	0	0	0	1	0	0	3	0	36	1	1	0	0	0	0	0	0	1	0	0	0
Otu01256	Bacteria	Actinobacteria	0319-7L14	0319-7L14_or	0319-7L14_fa	0319-7L14_ge	602	1	14	29	14	14	13	30	33	32	34	6	5	2	2	1	0	3	0	15	8	5	6	6	7	1	0	1	0	0	0	0	0	0	0	7	3	1	0	1	1	1	0
Otu01257	Bacteria	Proteobacteria	Alphaproteobacteria	Alphaproteobacteria_unclassified	Alphaproteobacteria_unclassified	Alphaproteobacteria_unclassified	764	0	0	0	0	0	0	0	1	0	0	8	0	6	25	1	4	0	0	0	0	0	0	0	0	0	1	0	2	1	0	0	0	1	0	0	0	0	8	2	20	9	515
Otu01258	Bacteria	Proteobacteria	Gammaproteobacteria	Gammaproteobacteria_Incertae_Sedis	Unknown_Family	uncultured	1018	0	0	0	0	1	0	0	0	1	0	1	1	2	76	94	132	34	0	0	0	0	0	0	0	1	0	2	20	20	112	18	8	15	0	0	0	0	0	18	43	53	4
Otu01259	Bacteria	Planctomycetes	Planctomycetacia	Pirellulales	Pirellulaceae	uncultured	286	0	0	0	0	2	1	6	2	7	6	5	2	5	0	4	3	2	0	0	2	2	6	0	2	1	5	5	4	2	6	6	8	29	0	1	2	3	0	1	1	16	7
Otu01260	Bacteria	Gemmatimonadetes	AKAU4049	AKAU4049_or	AKAU4049_fa	AKAU4049_ge	767	0	2	13	18	7	6	25	14	12	17	3	0	2	28	16	12	7	0	9	3	8	3	8	3	5	0	2	13	5	22	13	1	0	0	21	5	27	1	2	1	5	0
Otu01261	Bacteria	Planctomycetes	Planctomycetacia	Pirellulales	Pirellulaceae	Pirellulaceae_unclassified	1067	0	0	1	0	0	0	10	37	77	113	30	27	27	21	26	3	7	0	1	0	0	19	22	19	16	18	10	9	0	3	1	2	2	0	3	0	13	17	4	3	6	6
Otu01262	Bacteria	Proteobacteria	Alphaproteobacteria	Rhizobiales	Rhizobiaceae	Allorhizobium-Neorhizobium-Pararhizobium-Rhizobium	1088	4	0	3	1	5	9	10	14	54	10	14	112	102	34	141	25	2	5	3	2	0	12	6	18	0	1	0	9	2	15	4	0	3	1	7	3	1	0	9	4	5	2
Otu01263	Bacteria	Proteobacteria	Deltaproteobacteria	Desulfuromonadales	Desulfuromonadaceae	Desulfuromonas	1349	0	0	0	0	2	1	15	105	268	173	18	9	6	24	11	23	2	0	0	2	3	27	60	18	15	5	0	9	21	7	0	0	1	0	0	0	34	4	7	7	26	3
Otu01264	Bacteria	Verrucomicrobia	Verrucomicrobiae	Chthoniobacterales	Chthoniobacteraceae	Candidatus_Udaeobacter	418	75	26	16	0	0	2	2	2	18	5	9	0	1	0	0	0	0	30	13	5	1	1	4	2	0	0	0	1	0	1	0	0	1	23	8	0	0	0	1	0	2	1
Otu01265	Bacteria	Chloroflexi	Anaerolineae	SBR1031	A4b	A4b_ge	697	0	0	0	0	0	0	0	0	10	11	11	7	25	35	61	81	9	0	0	0	0	0	1	1	2	7	0	10	4	46	6	0	4	1	0	0	0	0	11	30	1	6
Otu01266	Bacteria	Gemmatimonadetes	Gemmatimonadetes	Gemmatimonadales	Gemmatimonadaceae	uncultured	744	22	111	50	5	1	2	2	0	1	0	9	5	3	1	3	0	3	18	15	7	0	4	0	1	0	2	0	1	0	8	4	22	20	18	9	0	1	0	1	1	2	1
Otu01267	Bacteria	Proteobacteria	Gammaproteobacteria	Betaproteobacteriales	Burkholderiaceae	uncultured	94	1	2	0	0	0	0	0	5	6	2	4	9	8	0	0	0	0	1	0	0	0	1	1	1	0	0	0	0	0	1	0	0	1	8	0	0	1	0	0	0	1	0
Otu01268	Archaea	Thaumarchaeota	Nitrososphaeria	Nitrososphaerales	Nitrososphaeraceae	Nitrososphaeraceae_ge	94	0	0	2	1	1	2	8	3	2	2	3	2	2	0	0	1	0	1	0	1	1	3	2	2	1	5	2	1	3	0	0	0	0	0	0	1	2	0	2	1	0	1
Otu01269	Bacteria	Chloroflexi	Anaerolineae	SBR1031	SBR1031_fa	SBR1031_ge	836	0	0	0	0	0	0	0	0	1	0	1	1	1	39	97	130	9	0	0	0	0	0	0	1	0	2	1	38	8	27	10	1	0	0	0	0	0	0	16	14	40	81
Otu01270	Bacteria	Chloroflexi	Dehalococcoidia	GIF9	GIF9_fa	GIF9_ge	1366	0	0	0	0	0	0	0	0	0	0	0	0	0	0	1	1	0	0	0	0	0	0	0	0	0	5	0	60	0	142	0	7	10	0	0	0	0	0	8	10	0	17
Otu01271	Bacteria	Proteobacteria	Deltaproteobacteria	Myxococcales	Polyangiaceae	Polyangiaceae_unclassified	267	6	1	0	0	2	7	1	0	4	6	10	27	7	2	2	0	0	3	0	2	4	0	0	1	1	7	1	1	0	2	0	3	16	7	1	11	1	0	0	4	5	0
Otu01272	Bacteria	Bacteroidetes	Bacteroidia	Cytophagales	Hymenobacteraceae	Adhaeribacter	424	28	48	30	18	9	17	8	0	7	0	2	2	4	0	4	9	1	21	10	7	2	2	1	1	0	0	0	1	0	0	1	0	4	11	3	2	2	2	1	0	0	0
Otu01273	Bacteria	Proteobacteria	Alphaproteobacteria	Alphaproteobacteria_unclassified	Alphaproteobacteria_unclassified	Alphaproteobacteria_unclassified	94	0	0	0	0	0	0	0	0	3	11	4	17	7	2	2	1	2	0	0	0	0	0	0	0	0	7	0	1	1	1	0	0	0	0	0	0	0	1	0	0	0	1
Otu01274	Bacteria	Chloroflexi	KD4-96	KD4-96_or	KD4-96_fa	KD4-96_ge	403	9	9	5	3	1	0	12	21	39	14	3	2	4	2	6	5	3	6	5	2	1	3	8	2	6	0	1	7	0	2	2	1	6	8	4	2	7	2	2	1	4	5
Otu01275	Bacteria	Actinobacteria	Actinobacteria	Propionibacteriales	Nocardioidaceae	Nocardioidaceae_unclassified	686	163	58	6	2	1	12	0	1	22	2	30	1	1	0	3	0	0	33	12	4	2	4	1	9	0	0	1	0	0	0	6	0	2	35	3	1	0	0	0	0	0	0
Otu01276	Bacteria	Planctomycetes	Planctomycetacia	Pirellulales	Pirellulaceae	Pir4_lineage	763	0	1	7	0	25	58	25	29	26	11	13	14	7	31	10	33	3	0	1	103	8	10	11	6	0	2	5	8	2	13	2	0	2	0	1	18	3	3	2	6	1	1
Otu01277	Bacteria	Planctomycetes	Planctomycetacia	Pirellulales	Pirellulaceae	uncultured	478	0	0	0	1	0	3	14	27	41	17	1	4	1	11	11	11	9	0	2	3	5	19	11	10	1	6	7	8	9	19	4	2	4	0	0	0	2	2	5	6	5	2
Otu01278	Bacteria	Planctomycetes	Planctomycetacia	Pirellulales	Pirellulaceae	Pirellula	344	18	23	9	3	2	3	2	0	7	8	0	0	0	0	4	1	1	8	27	1	0	1	5	2	0	0	0	1	0	1	0	0	0	28	9	1	6	0	1	1	0	0
Otu01279	Bacteria	Bacteria_unclassified	Bacteria_unclassified	Bacteria_unclassified	Bacteria_unclassified	Bacteria_unclassified	94	0	0	0	0	0	0	0	0	0	1	1	12	4	7	1	3	3	0	0	0	0	0	0	0	0	6	0	3	0	2	0	2	1	0	0	0	0	0	1	1	1	9
Otu01280	Bacteria	Nitrospirae	Nitrospira	Nitrospirales	Nitrospiraceae	Nitrospira	1020	0	0	0	0	0	0	0	0	4	1	11	24	38	172	98	168	12	0	0	0	0	0	0	0	1	1	6	36	3	3	1	0	1	0	0	0	0	0	8	3	2	2
Otu01281	Bacteria	Planctomycetes	Planctomycetacia	Pirellulales	Pirellulaceae	Pir4_lineage	94	3	1	0	0	3	2	6	3	7	10	4	4	1	3	0	0	0	0	0	1	1	2	1	1	0	0	1	0	0	0	0	0	0	0	2	1	0	0	1	0	0	1
Otu01282	Bacteria	BRC1	BRC1_cl	BRC1_or	BRC1_fa	BRC1_ge	939	0	0	0	0	1	0	1	0	4	9	12	12	27	22	37	184	27	0	0	0	0	0	0	0	0	2	13	33	7	34	17	57	29	0	0	0	1	1	12	19	26	20
Otu01283	Bacteria	BRC1	BRC1_cl	BRC1_or	BRC1_fa	BRC1_ge	231	3	2	1	0	1	1	3	6	9	0	0	1	0	0	0	0	0	14	10	7	1	3	3	3	1	8	1	1	2	0	0	0	1	15	2	4	0	2	1	0	1	1
Otu01284	Bacteria	Gemmatimonadetes	S0134_terrestrial_group	S0134_terrestrial_group_or	S0134_terrestrial_group_fa	S0134_terrestrial_group_ge	1068	1	55	49	25	5	4	66	52	39	22	29	36	6	0	1	0	2	1	11	9	6	21	19	17	5	119	3	0	0	1	0	0	0	0	11	8	17	13	0	0	0	1
Otu01285	Bacteria	Proteobacteria	Gammaproteobacteria	Betaproteobacteriales	Rhodocyclaceae	Rhodocyclaceae_unclassified	580	0	2	3	4	5	3	3	5	20	15	7	3	3	9	12	24	1	0	7	1	0	3	10	2	3	1	1	33	3	33	2	2	0	0	6	4	7	2	1	1	1	1
Otu01286	Bacteria	Bacteroidetes	Bacteroidia	Flavobacteriales	Crocinitomicaceae	Fluviicola	837	2	6	8	9	8	7	22	42	143	32	3	7	2	6	16	59	4	7	5	4	3	7	15	10	4	2	2	2	1	0	0	0	0	4	3	1	2	3	2	1	0	0
Otu01287	Bacteria	Proteobacteria	Deltaproteobacteria	Deltaproteobacteria_unclassified	Deltaproteobacteria_unclassified	Deltaproteobacteria_unclassified	1283	0	1	12	4	0	2	44	113	168	37	44	23	18	13	9	0	8	0	8	2	6	46	98	17	7	8	16	22	4	2	1	1	1	0	13	4	11	21	4	0	1	2
Otu01288	Bacteria	Proteobacteria	Gammaproteobacteria	Betaproteobacteriales	Methylophilaceae	UBA6140	844	5	4	1	0	2	0	0	0	18	13	4	5	2	2	1	6	9	1	2	0	0	1	8	8	0	0	0	1	1	5	0	87	57	1	9	2	6	0	2	1	3	9
Otu01289	Bacteria	Planctomycetes	OM190	OM190_or	OM190_fa	OM190_ge	1690	0	5	10	10	62	36	21	19	32	56	161	348	73	13	10	7	5	0	5	19	1	1	2	2	10	102	0	10	2	10	3	1	3	0	2	7	1	5	8	20	1	13
Otu01290	Bacteria	Proteobacteria	Deltaproteobacteria	SAR324_clade(Marine_group_B)	SAR324_clade(Marine_group_B)_fa	SAR324_clade(Marine_group_B)_ge	981	0	0	0	0	0	0	0	0	16	12	17	26	25	109	96	105	3	0	0	0	0	0	0	0	4	6	7	59	8	33	10	2	5	0	0	0	0	0	19	76	8	55
Otu01291	Bacteria	Verrucomicrobia	Verrucomicrobiae	Opitutales	Opitutaceae	Lacunisphaera	363	16	15	19	0	2	10	7	6	5	3	1	5	1	2	1	3	0	12	9	6	1	5	1	1	0	0	0	3	3	3	0	1	1	23	9	2	0	0	1	2	4	3
Otu01292	Bacteria	Latescibacteria	Latescibacteria_cl	Latescibacteria_or	Latescibacteria_fa	Latescibacteria_ge	816	0	0	0	0	0	0	0	1	13	53	42	43	24	41	31	19	3	0	0	0	0	0	1	1	10	36	4	28	12	12	1	1	5	0	0	3	10	23	2	3	8	5
Otu01293	Bacteria	Planctomycetes	Planctomycetacia	Planctomycetales	uncultured	uncultured_ge	780	1	13	31	14	82	66	24	3	4	1	0	0	0	0	1	0	1	1	8	68	18	21	7	13	0	1	0	0	0	2	2	0	1	2	4	47	2	0	0	0	0	1
Otu01294	Bacteria	Proteobacteria	Alphaproteobacteria	Rhizobiales	Rhizobiales_Incertae_Sedis	Bauldia	560	10	15	11	5	2	7	2	26	35	3	7	38	3	8	3	13	2	3	4	4	2	7	13	3	1	3	0	8	1	11	5	17	26	2	1	3	1	1	2	11	3	3
Otu01295	Bacteria	Verrucomicrobia	Verrucomicrobiae	Pedosphaerales	Pedosphaeraceae	Pedosphaeraceae_ge	830	0	0	0	0	0	0	0	0	68	11	26	23	25	21	52	44	5	0	0	0	0	0	3	1	6	26	2	28	3	7	1	1	1	0	0	0	0	8	40	21	0	4
Otu01296	Bacteria	Actinobacteria	Acidimicrobiia	Actinomarinales	uncultured	uncultured_ge	1254	0	0	0	0	0	0	18	41	49	14	30	27	31	111	106	54	25	0	0	0	0	6	13	3	19	19	31	21	23	97	67	2	0	0	0	1	0	6	7	27	3	0
Otu01297	Bacteria	Zixibacteria	Zixibacteria_cl	Zixibacteria_or	Zixibacteria_fa	Zixibacteria_ge	940	0	0	0	0	0	0	0	0	2	0	0	0	0	0	7	162	354	0	0	0	0	0	0	0	0	1	0	1	0	37	8	6	5	0	0	0	1	0	5	8	123	2
Otu01298	Bacteria	Planctomycetes	Pla4_lineage	Pla4_lineage_or	Pla4_lineage_fa	Pla4_lineage_ge	455	0	0	0	0	0	1	1	4	6	13	15	20	6	18	23	16	3	0	0	4	2	0	0	1	3	3	3	12	5	18	2	1	2	0	1	0	1	6	2	6	4	0
Otu01299	Bacteria	Chloroflexi	Anaerolineae	Anaerolineales	Anaerolineaceae	uncultured	532	0	0	0	1	0	0	1	0	2	3	1	4	4	1	0	1	26	0	0	0	0	0	0	0	0	0	3	4	2	7	0	172	68	0	0	0	4	0	2	2	6	6
Otu01300	Bacteria	Planctomycetes	Planctomycetacia	Planctomycetales	uncultured	uncultured_ge	1033	0	15	8	6	93	91	4	0	1	0	5	0	2	0	1	0	0	1	6	102	3	0	1	8	1	0	0	0	0	1	0	0	0	2	33	44	1	0	0	0	0	0
Otu01301	Bacteria	Actinobacteria	Acidimicrobiia	Microtrichales	Ilumatobacteraceae	Ilumatobacter	2518	20	33	68	59	32	35	141	84	126	103	44	111	29	54	30	40	7	8	28	28	29	40	32	43	22	13	7	15	23	28	24	5	13	30	19	8	13	12	3	5	3	1
Otu01302	Bacteria	Actinobacteria	Acidimicrobiia	Microtrichales	uncultured	uncultured_ge	343	4	15	13	13	5	6	1	7	8	7	14	6	1	5	4	1	2	18	6	6	1	2	1	0	2	2	2	0	4	2	0	7	2	3	1	6	2	0	2	0	2	0
Otu01303	Bacteria	Acidobacteria	Subgroup_17	Subgroup_17_or	Subgroup_17_fa	Subgroup_17_ge	526	2	4	1	1	1	1	10	40	17	9	6	8	7	8	15	2	9	0	1	0	0	3	6	3	3	5	17	15	3	11	19	1	1	0	2	1	7	13	1	1	4	11
Otu01304	Bacteria	Planctomycetes	Planctomycetes_unclassified	Planctomycetes_unclassified	Planctomycetes_unclassified	Planctomycetes_unclassified	1489	2	57	41	34	117	21	39	16	28	18	92	24	21	4	6	4	4	2	16	72	11	6	10	7	14	23	6	0	1	1	0	0	1	4	25	55	9	6	1	0	2	3
Otu01305	Bacteria	Acidobacteria	Subgroup_6	Subgroup_6_or	Subgroup_6_fa	Subgroup_6_ge	394	0	0	0	0	0	1	15	12	29	36	25	11	6	4	5	7	1	0	0	0	0	0	12	0	13	10	7	12	2	10	6	0	0	0	1	0	1	2	0	7	2	2
Otu01306	Bacteria	Proteobacteria	Alphaproteobacteria	Rhizobiales	Rhodomicrobiaceae	Rhodomicrobium	1009	0	0	0	0	0	0	0	0	10	69	74	107	35	75	17	29	3	0	0	0	0	0	0	0	3	0	0	3	9	9	0	0	1	0	0	0	3	4	12	16	63	6
Otu01307	Bacteria	Proteobacteria	Alphaproteobacteria	Rhizobiales	Rhizobiales_Incertae_Sedis	uncultured	1434	2	0	0	0	0	0	0	0	2	6	2	3	4	5	23	11	7	0	0	0	0	3	0	1	0	7	2	38	4	109	9	11	103	1	0	0	0	0	11	14	62	12
Otu01308	Bacteria	Planctomycetes	OM190	OM190_or	OM190_fa	OM190_ge	761	0	7	11	3	3	0	1	5	19	45	27	76	15	47	35	10	12	0	9	1	1	0	6	1	4	25	13	28	13	22	10	2	0	0	2	0	1	2	2	7	3	1
Otu01309	Bacteria	Verrucomicrobia	Verrucomicrobiae	Pedosphaerales	Pedosphaeraceae	Pedosphaeraceae_ge	337	2	3	7	2	5	3	1	10	23	4	13	9	2	3	0	7	0	0	7	3	1	9	8	4	1	11	0	14	0	0	0	0	0	1	2	2	2	0	3	1	5	1
Otu01310	Bacteria	Latescibacteria	Latescibacteria_cl	Latescibacteria_or	Latescibacteria_fa	Latescibacteria_ge	1156	0	4	15	3	0	2	44	29	39	34	15	6	12	83	29	4	8	0	6	1	1	6	5	9	15	5	6	55	2	29	9	0	6	0	7	5	19	12	8	10	22	1
Otu01311	Bacteria	Verrucomicrobia	Verrucomicrobiae	Opitutales	Opitutaceae	Alterococcus	486	1	19	22	36	17	12	15	18	21	14	3	1	2	3	2	4	4	3	2	7	7	5	8	5	5	2	2	1	0	0	0	0	0	1	11	5	7	13	1	0	1	20
Otu01312	Bacteria	Proteobacteria	Gammaproteobacteria	CCM19a	CCM19a_fa	CCM19a_ge	1280	0	0	0	0	0	0	2	4	23	18	16	16	24	40	50	181	23	2	0	0	0	0	0	0	5	3	0	56	39	121	27	10	0	0	0	0	0	0	32	77	60	11
Otu01313	Bacteria	Actinobacteria	Actinobacteria	Propionibacteriales	Nocardioidaceae	Nocardioides	776	14	55	52	41	2	8	0	0	3	0	2	2	0	0	3	0	5	33	34	8	2	3	4	23	0	1	0	1	2	1	8	0	0	5	8	1	0	0	1	0	2	0
Otu01314	Bacteria	Proteobacteria	Deltaproteobacteria	Syntrophobacterales	Syntrophaceae	uncultured	471	0	0	0	0	0	0	0	0	0	1	0	0	0	0	0	0	0	0	0	0	0	0	0	0	0	0	0	10	0	25	0	7	131	0	0	0	0	0	7	1	2	23
Otu01315	Bacteria	Planctomycetes	Phycisphaerae	S-70	S-70_fa	S-70_ge	466	0	0	0	0	0	0	0	0	0	1	13	46	16	8	23	61	3	0	0	0	0	0	0	0	1	8	0	5	0	1	0	0	2	0	0	0	2	12	5	1	6	12
Otu01316	Bacteria	Planctomycetes	Planctomycetacia	Planctomycetales	uncultured	uncultured_ge	932	0	3	5	11	12	4	5	13	74	25	8	7	6	20	21	42	29	0	3	2	7	5	16	5	3	12	17	43	8	31	4	45	13	1	1	0	1	2	7	8	15	2
Otu01317	Bacteria	Proteobacteria	Alphaproteobacteria	Rhodospirillales	Rhodospirillaceae	uncultured	409	0	4	11	4	5	1	3	1	11	26	12	11	4	27	18	35	3	1	3	2	1	1	2	0	0	5	0	17	3	19	3	0	0	4	0	3	4	1	1	9	6	9
Otu01318	Bacteria	Firmicutes	Negativicutes	Selenomonadales	Veillonellaceae	Anaerospora	397	0	1	0	2	1	6	3	6	6	6	23	49	18	5	4	0	3	1	3	1	0	10	1	5	0	22	9	2	3	3	1	3	12	2	1	0	5	2	2	2	0	0
Otu01319	Bacteria	Planctomycetes	Planctomycetacia	Pirellulales	Pirellulaceae	uncultured	357	2	0	0	0	0	0	24	17	19	20	4	6	3	22	10	0	1	0	0	0	0	8	2	4	5	4	19	11	1	4	1	1	3	0	0	3	3	1	0	2	0	2
Otu01320	Bacteria	Proteobacteria	Alphaproteobacteria	Reyranellales	Reyranellaceae	Reyranella	1120	3	17	16	3	1	2	4	2	2	3	1	7	0	8	1	4	186	6	4	0	0	5	0	1	0	0	2	0	0	3	1	110	63	4	2	0	0	0	5	5	8	0
Otu01321	Bacteria	Proteobacteria	Gammaproteobacteria	Gammaproteobacteria_unclassified	Gammaproteobacteria_unclassified	Gammaproteobacteria_unclassified	1684	0	0	0	0	0	4	13	2	22	1	4	13	7	109	68	399	93	0	0	6	5	0	0	2	0	13	0	9	2	65	39	67	11	0	0	7	0	0	17	101	36	29
Otu01322	Bacteria	Planctomycetes	Phycisphaerae	Pla1_lineage	Pla1_lineage_fa	Pla1_lineage_ge	2472	0	0	0	0	0	0	0	0	74	260	13	9	54	163	160	62	14	0	0	0	0	0	3	8	18	2	15	272	28	129	5	3	3	0	0	0	0	5	50	30	5	8
Otu01323	Bacteria	Verrucomicrobia	Verrucomicrobiae	Pedosphaerales	Pedosphaeraceae	Pedosphaeraceae_ge	327	0	0	0	0	2	0	1	3	15	14	3	1	6	7	8	8	1	0	0	0	0	0	3	2	2	8	0	8	0	10	0	1	6	0	5	0	1	6	2	4	4	4
Otu01324	Bacteria	Proteobacteria	Gammaproteobacteria	Betaproteobacteriales	Nitrosomonadaceae	mle1-7	94	0	0	0	0	0	0	0	0	0	2	0	4	2	0	3	6	6	0	0	0	0	0	0	0	0	0	0	1	0	3	0	2	6	0	0	0	0	0	0	0	6	2
Otu01325	Bacteria	Actinobacteria	MB-A2-108	MB-A2-108_or	MB-A2-108_fa	MB-A2-108_ge	504	0	22	19	10	8	3	38	13	16	20	10	4	3	0	3	1	1	1	10	21	8	9	11	8	2	4	0	0	0	1	0	6	15	0	23	13	7	0	0	0	0	3
Otu01326	Bacteria	Actinobacteria	0319-7L14	0319-7L14_or	0319-7L14_fa	0319-7L14_ge	966	0	0	3	11	7	9	79	32	38	25	0	1	4	1	4	3	4	0	3	14	32	28	18	22	3	1	3	3	2	3	0	0	1	0	47	13	55	0	0	1	0	1
Otu01327	Bacteria	Proteobacteria	Alphaproteobacteria	Rhodobacterales	Rhodobacteraceae	Rubellimicrobium	630	103	17	2	0	1	6	0	0	11	2	18	0	0	0	2	1	2	39	11	1	2	0	1	18	0	0	0	0	0	0	17	0	3	33	4	0	0	1	0	1	0	0
Otu01328	Bacteria	Verrucomicrobia	Verrucomicrobiae	Pedosphaerales	Pedosphaeraceae	Pedosphaeraceae_ge	541	0	0	3	3	74	24	9	3	9	11	12	2	0	1	1	0	1	0	4	22	4	1	1	3	2	4	0	2	1	0	0	0	1	0	2	11	10	3	2	2	2	1
Otu01329	Bacteria	Elusimicrobia	Elusimicrobia	Lineage_IV	Lineage_IV_fa	Lineage_IV_ge	266	0	0	0	0	0	0	0	0	0	0	0	0	0	0	1	4	7	1	0	0	3	4	17	3	2	0	0	4	2	4	1	6	3	12	10	2	1	8	5	10	5	3
Otu01330	Bacteria	Proteobacteria	Gammaproteobacteria	JTB23	JTB23_fa	JTB23_ge	475	0	7	5	5	5	5	24	17	39	27	6	2	6	9	2	2	1	0	0	6	3	3	4	1	6	8	1	26	4	18	0	0	0	0	0	3	0	3	5	3	1	4
Otu01331	Bacteria	Firmicutes	Clostridia	Clostridiales	Ruminococcaceae	Ruminococcaceae_unclassified	202	0	5	0	0	7	8	0	0	5	2	6	8	5	2	1	1	2	0	0	1	0	1	0	1	4	2	7	3	0	3	3	3	27	0	6	2	1	0	0	1	3	1
Otu01332	Bacteria	Firmicutes	Clostridia	Clostridiales	Family_XIII	Anaerovorax	322	3	3	0	0	1	4	2	1	2	4	6	3	3	7	2	1	1	9	1	5	0	4	1	3	1	4	3	1	1	3	2	2	5	16	22	0	0	6	6	64	2	5
Otu01333	Bacteria	Actinobacteria	Actinobacteria	Micrococcales	Intrasporangiaceae	Intrasporangium	1427	62	104	87	48	1	1	0	1	6	2	3	1	2	0	3	0	1	190	62	5	2	1	0	1	0	0	0	0	0	2	1	5	0	0	16	4	1	0	0	0	0	0
Otu01334	Bacteria	Bacteroidetes	Bacteroidia	Chitinophagales	Saprospiraceae	uncultured	1228	189	285	64	1	2	23	0	0	15	1	23	0	2	0	3	2	5	70	22	8	2	2	1	0	0	0	0	0	0	0	0	0	0	135	6	1	0	1	1	1	2	1
Otu01335	Bacteria	Actinobacteria	Acidimicrobiia	Actinomarinales	Actinomarinales_unclassified	Actinomarinales_unclassified	1542	0	0	1	2	0	0	10	75	418	236	24	0	16	8	3	1	7	1	0	0	6	23	79	34	33	12	20	31	7	4	0	0	1	0	1	0	22	34	4	4	2	2
Otu01336	Bacteria	Planctomycetes	Planctomycetacia	Pirellulales	Pirellulaceae	Pir4_lineage	190	29	17	13	1	0	3	0	1	3	2	4	1	0	2	3	0	1	8	5	1	0	3	0	2	0	6	0	2	0	0	0	0	0	6	1	1	0	0	0	0	1	0
Otu01337	Bacteria	Planctomycetes	Phycisphaerae	MSBL9	4572-13	4572-13_ge	885	0	0	0	1	1	3	9	0	8	2	24	13	10	10	5	14	10	0	0	0	1	0	0	1	5	41	3	5	4	9	4	173	56	0	0	0	1	0	1	8	23	2
Otu01338	Bacteria	Gemmatimonadetes	S0134_terrestrial_group	S0134_terrestrial_group_or	S0134_terrestrial_group_fa	S0134_terrestrial_group_ge	1206	0	53	66	66	73	73	88	7	6	0	2	1	2	0	2	2	8	9	10	28	25	3	5	10	1	0	0	0	0	1	0	1	0	2	51	42	2	2	0	0	0	0
Otu01339	Bacteria	Chloroflexi	Anaerolineae	Ardenticatenales	uncultured	uncultured_ge	8156	0	1	0	0	0	0	28	22	74	261	190	259	315	490	585	691	106	0	0	0	1	2	14	0	23	174	38	226	35	337	32	6	22	0	0	0	6	38	179	425	47	405
Otu01340	Bacteria	Proteobacteria	Deltaproteobacteria	Desulfobacterales	Desulfobulbaceae	Desulfobulbaceae_unclassified	662	1	0	0	0	0	0	0	0	0	4	7	12	4	3	3	6	6	0	0	0	0	0	0	0	0	18	0	2	1	3	3	6	13	0	0	0	0	0	0	2	26	1
Otu01341	Bacteria	Planctomycetes	Phycisphaerae	MSBL9	GWC2-45-44	GWC2-45-44_ge	361	0	0	0	0	3	5	9	0	10	5	2	0	4	6	5	16	0	0	0	12	4	3	5	2	2	9	0	13	1	18	0	2	9	0	1	7	1	4	0	9	2	5
Otu01342	Bacteria	Rokubacteria	NC10	Rokubacteriales	Rokubacteriales_fa	Rokubacteriales_ge	827	0	0	0	0	0	0	0	11	42	47	11	2	8	11	13	2	5	0	0	0	0	2	12	6	25	1	3	25	15	11	4	6	4	1	0	0	5	9	4	6	17	23
Otu01343	Bacteria	Actinobacteria	Acidimicrobiia	IMCC26256	IMCC26256_fa	IMCC26256_ge	1462	0	9	7	4	9	10	22	22	34	50	75	33	39	65	69	62	19	0	4	5	6	13	15	9	12	23	3	39	13	50	18	9	10	0	5	27	12	29	14	47	16	10
Otu01344	Bacteria	Proteobacteria	Alphaproteobacteria	uncultured	uncultured_fa	uncultured_ge	3350	0	0	0	0	0	0	0	0	4	7	4	3	58	203	430	223	78	0	0	0	0	0	0	1	0	8	12	148	87	417	152	17	7	0	0	0	0	0	72	157	115	58
Otu01345	Bacteria	Acidobacteria	Subgroup_15	Subgroup_15_or	Subgroup_15_fa	Subgroup_15_ge	976	0	0	0	0	0	0	0	0	14	9	3	19	18	47	71	99	18	0	0	0	0	1	2	0	4	17	13	38	6	38	18	2	3	0	1	0	6	20	5	10	27	3
Otu01346	Bacteria	Gemmatimonadetes	S0134_terrestrial_group	S0134_terrestrial_group_or	S0134_terrestrial_group_fa	S0134_terrestrial_group_ge	570	0	23	24	4	0	3	0	5	4	1	0	2	0	0	2	4	0	3	10	2	0	1	8	0	0	2	0	1	0	8	0	11	60	0	8	6	0	0	1	4	2	8
Otu01347	Bacteria	Proteobacteria	Deltaproteobacteria	Myxococcales	BIrii41	BIrii41_ge	608	18	18	21	6	13	7	2	3	2	0	10	10	33	23	28	34	4	6	1	11	3	6	0	1	1	3	3	22	1	15	6	3	2	4	8	10	4	0	8	7	4	0
Otu01348	Bacteria	Spirochaetes	Spirochaetia	Spirochaetales	Spirochaetaceae	Spirochaeta_2	801	0	0	0	0	0	0	0	0	0	1	0	1	1	1	3	22	0	0	0	0	0	0	0	0	0	3	0	3	4	14	7	7	1	0	0	0	0	0	179	349	12	4
Otu01349	Bacteria	Planctomycetes	Planctomycetacia	Pirellulales	Pirellulaceae	uncultured	383	0	0	0	0	1	0	2	3	5	16	8	16	10	12	15	14	3	0	0	0	0	0	3	2	1	2	14	6	8	9	5	17	20	0	0	0	2	5	2	8	14	6
Otu01350	Bacteria	Chloroflexi	Dehalococcoidia	SAR202_clade	SAR202_clade_fa	SAR202_clade_ge	881	0	0	0	0	3	0	3	4	51	73	14	2	10	58	47	30	7	0	1	0	0	0	2	1	11	11	16	75	7	48	3	0	0	0	0	0	1	2	11	13	9	47
Otu01351	Bacteria	Firmicutes	Clostridia	Clostridiales	Ruminococcaceae	Ruminococcaceae_unclassified	210	1	4	3	0	11	8	2	2	4	0	6	3	4	2	2	3	1	4	1	1	1	0	2	1	0	4	1	1	1	7	3	0	6	5	1	2	1	1	5	1	8	2
Otu01352	Bacteria	Gemmatimonadetes	Gemmatimonadetes	Gemmatimonadales	Gemmatimonadaceae	uncultured	183	0	1	1	1	1	5	1	1	2	2	2	0	4	0	1	0	0	0	1	7	1	0	0	0	1	3	1	2	0	2	0	1	2	0	2	18	5	0	0	1	0	0
Otu01353	Bacteria	Proteobacteria	Gammaproteobacteria	Gammaproteobacteria_unclassified	Gammaproteobacteria_unclassified	Gammaproteobacteria_unclassified	90	0	2	0	1	1	2	2	2	7	7	7	10	2	2	1	0	1	0	1	0	1	0	0	1	0	0	1	3	1	2	0	0	0	0	0	0	1	0	0	0	0	1
Otu01354	Bacteria	Firmicutes	Clostridia	Clostridiales	Clostridiales_unclassified	Clostridiales_unclassified	304	5	5	2	0	5	5	3	6	3	21	11	9	9	5	7	1	2	1	3	7	1	10	1	1	2	5	5	1	1	3	3	3	15	2	2	12	1	2	0	2	0	0
Otu01355	Bacteria	Actinobacteria	Acidimicrobiia	Microtrichales	uncultured	uncultured_ge	1256	24	59	30	26	8	22	22	20	51	33	39	28	6	20	21	15	9	15	16	11	2	4	13	3	14	23	5	18	10	24	3	1	0	20	12	5	8	3	2	3	10	3
Otu01356	Bacteria	Bacteroidetes	Ignavibacteria	Kryptoniales	BSV26	BSV26_ge	1622	0	0	0	0	0	0	0	0	0	0	0	0	0	0	1	1	0	0	0	0	0	0	0	0	0	7	0	56	0	149	0	7	74	0	0	0	0	0	18	14	0	1
Otu01357	Bacteria	Verrucomicrobia	Verrucomicrobiae	Chthoniobacterales	Xiphinematobacteraceae	Candidatus_Xiphinematobacter	575	0	0	2	2	0	0	27	11	31	15	4	0	2	14	8	3	5	0	0	0	1	11	3	11	7	0	5	11	2	4	0	1	1	0	2	0	17	4	16	26	4	8
Otu01358	Bacteria	Proteobacteria	Gammaproteobacteria	1013-28-CG33	1013-28-CG33_fa	1013-28-CG33_ge	568	1	11	5	2	12	5	9	79	116	22	27	3	5	1	1	3	2	6	7	4	2	11	3	5	2	11	0	1	1	1	0	0	1	19	2	1	1	5	0	1	0	0
Otu01359	Bacteria	Proteobacteria	Deltaproteobacteria	Desulfarculales	Desulfarculaceae	uncultured	558	0	0	1	1	6	14	18	15	24	33	13	19	4	12	15	16	4	0	0	20	8	3	7	7	5	3	0	4	2	12	4	6	13	0	0	6	1	0	4	6	2	0
Otu01360	Bacteria	Chloroflexi	JG30-KF-CM66	JG30-KF-CM66_or	JG30-KF-CM66_fa	JG30-KF-CM66_ge	2021	0	0	0	0	0	0	4	17	54	152	78	64	58	109	131	78	7	1	0	0	0	1	1	2	19	50	10	96	32	137	23	4	4	0	0	0	0	1	42	59	22	23
Otu01361	Bacteria	Proteobacteria	Deltaproteobacteria	Myxococcales	Haliangiaceae	Haliangium	1336	1	0	10	6	34	45	440	0	133	2	4	0	3	0	0	0	3	9	0	1	41	14	1	34	14	0	1	0	0	0	0	0	2	0	9	22	2	0	0	0	0	1
Otu01362	Bacteria	Proteobacteria	Alphaproteobacteria	Alphaproteobacteria_unclassified	Alphaproteobacteria_unclassified	Alphaproteobacteria_unclassified	375	0	1	1	0	0	2	6	0	7	0	4	1	1	1	4	2	1	0	0	1	0	0	2	0	0	3	1	6	0	22	0	8	19	0	0	0	1	0	4	1	5	7
Otu01363	Bacteria	Proteobacteria	Alphaproteobacteria	Alphaproteobacteria_unclassified	Alphaproteobacteria_unclassified	Alphaproteobacteria_unclassified	87	0	0	0	0	0	0	0	0	3	1	2	1	1	5	5	1	3	0	0	0	0	0	0	0	0	0	0	2	2	4	0	4	3	0	0	0	0	0	0	3	0	10
Otu01364	Bacteria	Proteobacteria	Deltaproteobacteria	Myxococcales	Polyangiaceae	Sorangium	333	0	3	1	1	0	1	8	3	2	7	30	41	15	1	8	0	8	0	1	0	0	0	3	0	9	4	2	2	0	14	2	1	30	1	2	1	7	3	2	0	1	1
Otu01365	Bacteria	Latescibacteria	Latescibacteria_cl	Latescibacteria_or	Latescibacteria_fa	Latescibacteria_ge	614	0	0	0	0	0	0	15	6	14	4	2	0	2	16	27	31	9	0	0	0	2	1	1	0	2	2	1	26	11	57	15	14	7	0	0	0	0	0	7	39	21	3
Otu01366	Bacteria	Proteobacteria	Deltaproteobacteria	Myxococcales	Sandaracinaceae	Sandaracinus	1266	0	0	0	0	0	0	2	0	2	17	80	117	56	38	60	26	16	0	0	0	0	0	0	0	15	85	6	45	3	41	1	1	1	0	0	0	0	5	35	21	7	8
Otu01367	Bacteria	Proteobacteria	Alphaproteobacteria	Rhizobiales	Xanthobacteraceae	uncultured	490	14	35	16	10	6	7	2	6	6	4	9	1	1	2	4	0	4	30	13	4	0	2	2	1	0	2	1	1	0	0	1	0	5	11	5	1	0	1	0	1	0	1
Otu01368	Bacteria	Gemmatimonadetes	S0134_terrestrial_group	S0134_terrestrial_group_or	S0134_terrestrial_group_fa	S0134_terrestrial_group_ge	797	0	0	0	0	0	0	1	0	0	2	3	24	56	80	24	19	1	0	0	0	0	0	0	0	2	5	2	34	7	12	0	0	2	0	0	0	1	9	28	9	11	91
Otu01369	Bacteria	Bacteroidetes	Bacteroidia	Bacteroidales	Bacteroidetes_vadinHA17	Bacteroidetes_vadinHA17_ge	1415	0	0	0	0	0	0	0	0	0	0	0	0	0	0	0	0	3	0	0	0	0	0	0	0	0	6	0	62	0	127	0	34	53	0	0	0	0	0	30	11	1	7
Otu01370	Bacteria	Acidobacteria	Thermoanaerobaculia	Thermoanaerobaculales	Thermoanaerobaculaceae	Subgroup_10	915	0	0	0	0	0	2	3	1	10	14	30	15	33	34	85	16	5	0	0	0	0	0	0	0	3	17	10	25	6	80	5	6	4	0	0	0	0	2	46	41	6	7
Otu01371	Bacteria	Verrucomicrobia	Verrucomicrobiae	Chthoniobacterales	Chthoniobacteraceae	Chthoniobacteraceae_unclassified	436	2	5	4	7	17	9	2	10	32	16	18	36	9	2	7	12	2	3	8	6	4	0	0	1	2	6	0	10	2	6	3	1	0	3	1	1	3	1	0	1	0	1
Otu01372	Bacteria	Acidobacteria	Subgroup_6	Subgroup_6_or	Subgroup_6_fa	Subgroup_6_ge	323	2	4	3	0	1	0	0	4	18	3	6	15	12	27	13	30	5	3	1	1	0	0	1	1	0	1	0	12	0	1	0	0	1	0	0	0	0	0	1	4	1	0
Otu01373	Bacteria	Acidobacteria	Acidobacteriia	Solibacterales	Solibacteraceae_(Subgroup_3)	Solibacteraceae_(Subgroup_3)_unclassified	594	0	0	0	0	1	0	3	0	4	18	26	12	11	33	32	38	3	0	0	0	0	0	2	1	2	9	6	46	4	22	3	3	6	0	0	0	0	0	7	10	6	4
Otu01374	Bacteria	Firmicutes	Clostridia	Clostridiales	Clostridiales_unclassified	Clostridiales_unclassified	259	0	2	1	0	3	2	0	6	8	10	11	6	8	1	4	0	0	2	1	1	1	2	1	1	4	7	4	1	4	2	2	1	7	24	15	1	1	0	1	2	0	1
Otu01375	Bacteria	BRC1	BRC1_cl	BRC1_or	BRC1_fa	BRC1_ge	378	2	7	24	8	19	7	5	5	9	3	9	8	4	2	0	2	2	12	2	8	2	0	2	1	1	27	0	5	3	1	2	2	1	8	4	3	3	0	0	4	0	0
Otu01376	Bacteria	Gemmatimonadetes	Gemmatimonadetes	Gemmatimonadales	Gemmatimonadaceae	uncultured	1822	0	4	107	31	28	10	103	97	56	7	7	8	5	0	0	0	5	0	4	37	29	210	110	65	11	1	0	1	2	0	0	0	4	0	50	15	34	2	3	2	0	0
Otu01377	Bacteria	Chloroflexi	Anaerolineae	Anaerolineales	Anaerolineaceae	RBG-16-58-14	871	0	0	0	0	0	0	0	0	0	1	0	0	2	1	1	0	40	0	0	0	0	0	0	0	0	2	0	8	0	17	0	180	120	0	0	0	0	0	3	0	19	15
Otu01378	Bacteria	Bacteroidetes	Bacteroidia	Sphingobacteriales	env.OPS_17	env.OPS_17_ge	743	4	22	14	7	11	9	35	45	38	18	19	10	4	9	15	42	3	2	2	4	4	10	16	4	4	1	0	14	0	6	3	0	2	11	28	4	3	5	5	6	1	2
Otu01379	Archaea	Nanoarchaeaeota	Woesearchaeia	Woesearchaeia_or	Woesearchaeia_fa	Woesearchaeia_ge	628	0	0	0	0	0	0	0	0	0	2	2	0	0	4	2	5	13	0	0	0	0	0	0	0	0	1	3	10	7	14	0	17	256	0	0	0	0	0	6	5	14	39
Otu01380	Bacteria	Chloroflexi	Chloroflexia	Thermomicrobiales	JG30-KF-CM45	JG30-KF-CM45_ge	988	61	72	18	9	17	6	0	0	5	0	5	0	0	0	2	0	0	117	26	10	1	2	2	10	0	0	0	0	0	0	0	0	1	13	22	2	0	0	0	0	1	0
Otu01381	Bacteria	Planctomycetes	Phycisphaerae	Tepidisphaerales	WD2101_soil_group	WD2101_soil_group_ge	431	0	1	2	4	12	8	5	7	16	14	19	22	11	6	5	3	5	0	1	1	2	6	4	2	2	9	3	3	0	3	0	1	1	1	4	5	4	3	5	5	6	4
Otu01382	Bacteria	Omnitrophicaeota	Omnitrophicaeota_cl	Omnitrophicaeota_or	Omnitrophicaeota_fa	Omnitrophicaeota_ge	574	0	0	0	0	0	0	0	0	0	2	3	0	8	34	43	74	17	0	0	0	0	0	2	0	0	1	0	48	8	38	1	14	9	0	0	0	0	0	8	19	11	4
Otu01383	Bacteria	Proteobacteria	Gammaproteobacteria	Gammaproteobacteria_unclassified	Gammaproteobacteria_unclassified	Gammaproteobacteria_unclassified	863	0	0	0	0	0	0	2	27	171	67	50	10	13	11	18	8	4	0	0	0	0	0	1	1	12	21	5	25	11	33	5	2	1	0	0	0	0	0	4	3	4	1
Otu01384	Bacteria	Planctomycetes	Phycisphaerae	Tepidisphaerales	WD2101_soil_group	WD2101_soil_group_ge	305	5	10	14	0	7	6	3	9	3	10	16	15	3	4	0	1	2	2	4	2	3	1	0	4	3	6	0	0	0	1	1	0	15	5	1	8	10	5	0	1	0	1
Otu01385	Bacteria	Epsilonbacteraeota	Campylobacteria	Campylobacterales	Thiovulaceae	Sulfurimonas	1319	0	0	0	0	0	0	0	0	5	4	5	5	6	2	4	11	8	0	0	0	0	0	0	0	0	0	0	2	1	14	0	1	16	0	0	0	0	1	29	78	59	22
Otu01386	Bacteria	Chloroflexi	Dehalococcoidia	S085	S085_fa	S085_ge	777	0	0	1	1	0	0	0	4	15	10	12	12	9	59	44	23	3	0	0	0	0	0	1	0	4	8	1	17	15	78	13	12	5	0	0	0	2	4	9	26	9	4
Otu01387	Bacteria	Acidobacteria	Acidobacteriia	Solibacterales	Solibacteraceae_(Subgroup_3)	Bryobacter	1034	93	47	14	0	3	11	3	5	15	1	12	0	1	0	1	1	0	109	31	9	4	11	2	4	0	0	1	0	0	0	17	0	1	79	16	2	1	1	0	0	1	0
Otu01388	Bacteria	Acidobacteria	Acidobacteriia	Solibacterales	Solibacteraceae_(Subgroup_3)	Bryobacter	311	0	2	3	2	1	1	12	3	4	0	0	1	3	1	4	74	26	0	1	0	1	0	3	0	0	0	0	0	0	0	0	3	19	3	1	0	0	0	0	1	11	0
Otu01389	Bacteria	Proteobacteria	Gammaproteobacteria	CCD24	CCD24_fa	CCD24_ge	86	3	2	3	4	0	1	1	0	2	2	2	1	0	3	2	0	0	1	1	0	0	1	0	0	0	0	0	1	0	0	0	0	0	0	3	2	0	1	1	0	1	0
Otu01390	Bacteria	Proteobacteria	Gammaproteobacteria	Betaproteobacteriales	Nitrosomonadaceae	MND1	91	0	0	2	0	0	0	8	4	13	1	3	3	0	0	0	0	2	0	0	0	1	0	1	2	2	2	0	0	0	0	0	0	0	0	9	1	3	0	0	0	0	0
Otu01391	Bacteria	Proteobacteria	Gammaproteobacteria	Betaproteobacteriales	Nitrosomonadaceae	MND1	865	0	0	0	0	0	0	0	0	0	2	1	2	0	41	6	48	15	2	0	0	0	0	0	0	0	5	1	13	1	17	1	21	133	0	0	0	0	0	8	5	7	7
Otu01392	Bacteria	Gemmatimonadetes	BD2-11_terrestrial_group	BD2-11_terrestrial_group_or	BD2-11_terrestrial_group_fa	BD2-11_terrestrial_group_ge	731	1	4	5	1	4	13	18	8	20	4	17	27	10	20	21	25	30	3	2	12	5	0	2	0	1	11	0	21	3	42	4	31	13	0	0	1	0	0	10	31	10	4
Otu01393	Bacteria	Latescibacteria	Latescibacteria_cl	Latescibacteria_or	Latescibacteria_fa	Latescibacteria_ge	282	0	0	0	0	0	0	0	1	1	4	4	5	12	6	3	1	15	0	0	0	0	0	0	0	1	2	12	11	2	4	4	8	31	0	0	0	2	1	1	0	1	10
Otu01394	Bacteria	Bacteroidetes	Rhodothermia	Rhodothermales	Rhodothermaceae	Rhodothermaceae_ge	853	80	155	59	5	1	16	11	18	21	16	1	0	1	0	2	0	0	27	11	5	1	6	2	2	0	0	0	0	0	0	4	0	1	52	18	2	10	0	0	2	1	0
Otu01395	Bacteria	Proteobacteria	Deltaproteobacteria	Myxococcales	Haliangiaceae	Haliangium	262	38	26	17	8	2	9	2	2	3	1	10	1	0	0	1	1	0	13	2	1	1	1	1	0	1	1	0	0	0	0	1	0	1	7	14	0	2	0	0	0	0	0
Otu01396	Bacteria	Proteobacteria	Alphaproteobacteria	Puniceispirillales	Puniceispirillales_fa	Puniceispirillales_ge	1449	1	101	48	47	53	25	26	61	58	24	33	42	24	8	7	10	8	3	19	16	11	20	15	4	18	34	5	12	2	1	3	2	1	4	35	12	26	20	3	3	3	11
Otu01397	Bacteria	Proteobacteria	Alphaproteobacteria	Tistrellales	Geminicoccaceae	uncultured	665	0	8	5	2	7	5	55	25	25	21	31	35	17	8	3	2	6	0	3	8	2	11	6	10	14	15	11	7	2	0	1	0	1	1	2	8	8	23	1	2	3	0
Otu01398	Bacteria	Planctomycetes	Phycisphaerae	CCM11a	CCM11a_fa	CCM11a_ge	873	0	1	3	2	6	8	6	4	22	18	31	52	30	123	16	33	6	0	1	2	3	2	2	1	1	8	0	11	4	19	3	0	0	0	1	0	10	3	14	40	5	58
Otu01399	Bacteria	Verrucomicrobia	Verrucomicrobiae	Pedosphaerales	Pedosphaeraceae	Pedosphaeraceae_ge	397	0	1	2	1	2	4	5	5	10	10	5	3	3	11	9	13	4	0	5	2	3	2	1	1	4	4	1	30	2	9	0	2	6	0	2	0	5	4	6	3	4	1
Otu01400	Bacteria	Planctomycetes	Planctomycetacia	Pirellulales	Pirellulaceae	Pir4_lineage	406	0	0	1	0	0	0	3	12	4	8	6	4	2	17	9	0	1	0	0	0	0	0	0	1	2	1	3	4	3	5	4	5	3	0	0	0	1	4	4	4	9	21
Otu01401	Bacteria	Planctomycetes	Planctomycetacia	Pirellulales	Pirellulaceae	Rhodopirellula	691	0	0	0	0	0	0	1	7	16	12	18	31	12	13	42	31	10	0	0	0	0	1	3	3	5	3	11	19	7	69	21	2	2	0	0	0	0	3	6	27	4	2
Otu01402	Bacteria	Bacteroidetes	Ignavibacteria	Kryptoniales	BSV26	BSV26_ge	612	0	0	0	0	0	0	0	0	10	14	5	3	4	47	18	97	21	0	0	0	0	0	0	0	0	5	1	33	0	24	2	5	1	0	0	0	0	0	12	19	17	33
Otu01403	Bacteria	Proteobacteria	Alphaproteobacteria	Rhodospirillales	Rhodopirillaceae	Defluviicoccus	512	0	8	1	2	5	11	14	10	11	13	10	15	22	4	13	1	4	0	3	18	16	13	6	11	5	3	22	1	4	3	0	2	2	2	2	16	4	2	1	1	0	12
Otu01404	Bacteria	Acidobacteria	Subgroup_6	Subgroup_6_or	Subgroup_6_fa	Subgroup_6_ge	102	0	0	0	0	0	0	0	0	0	1	0	1	0	1	4	33	5	0	0	0	0	0	0	0	0	0	0	0	0	2	3	1	3	0	0	0	0	0	0	6	1	0
Otu01405	Bacteria	Gemmatimonadetes	Gemmatimonadetes	Gemmatimonadales	Gemmatimonadaceae	Gemmatimonadaceae_unclassified	520	0	1	2	0	27	6	3	6	37	11	16	33	17	37	10	3	8	0	0	8	0	2	1	3	2	16	3	42	4	8	3	1	4	0	0	4	3	0	3	15	6	0
Otu01406	Bacteria	Actinobacteria	Thermoleophilia	Thermoleophilia_unclassified	Thermoleophilia_unclassified	Thermoleophilia_unclassified	392	6	13	20	1	5	6	0	20	18	3	7	3	3	5	1	0	1	2	4	2	0	1	1	1	0	5	2	1	0	0	3	0	1	4	2	2	1	0	1	0	0	0
Otu01407	Bacteria	Firmicutes	Clostridia	Clostridiales	Lachnospiraceae	Herbinix	184	0	2	4	0	8	6	2	5	5	19	7	3	4	1	2	1	1	3	1	0	0	4	4	1	1	6	0	1	0	3	0	2	8	1	4	0	0	2	1	12	2	1
Otu01408	Bacteria	Gemmatimonadetes	Gemmatimonadetes	Gemmatimonadales	Gemmatimonadaceae	uncultured	531	0	1	1	0	3	9	3	1	30	32	3	0	4	30	20	48	2	0	0	5	0	1	1	1	6	5	4	59	6	8	2	1	0	0	1	3	0	0	7	4	0	39
Otu01409	Bacteria	Gemmatimonadetes	Gemmatimonadetes	Gemmatimonadales	Gemmatimonadaceae	uncultured	86	0	0	0	0	1	0	2	1	6	4	2	0	2	0	1	0	1	0	0	0	0	0	2	0	0	0	0	4	1	1	0	0	0	0	1	0	2	1	1	2	1	0
Otu01410	Bacteria	Proteobacteria	Alphaproteobacteria	Reyranellales	Reyranellaceae	Reyranella	789	60	109	38	18	8	7	3	0	11	5	6	0	0	0	0	0	12	16	17	2	2	6	7	0	4	1	0	1	0	0	4	1	12	27	17	4	5	0	2	0	0	0
Otu01411	Bacteria	Bacteroidetes	Bacteroidia	Chitinophagales	Chitinophagaceae	Flavisolibacter	174	25	3	1	0	0	5	0	0	9	2	33	0	0	0	4	1	1	3	1	1	0	0	0	0	0	0	0	0	0	0	8	0	1	15	2	0	0	0	0	0	0	0
Otu01412	Bacteria	Rokubacteria	NC10	Rokubacteriales	Rokubacteriales_fa	Rokubacteriales_ge	613	0	3	2	3	0	0	3	13	23	8	8	5	5	5	6	2	6	1	2	2	0	3	5	5	7	3	38	33	3	7	2	2	16	1	8	3	13	11	4	0	1	6
Otu01413	Bacteria	Proteobacteria	Alphaproteobacteria	Rhizobiales	KF-JG30-B3	KF-JG30-B3_ge	990	0	0	1	0	0	1	50	33	27	28	75	105	48	31	47	17	5	0	0	0	8	4	3	1	3	81	2	5	2	31	8	1	0	0	0	0	0	0	3	14	3	17
Otu01414	Bacteria	Actinobacteria	Acidimicrobiia	Microtrichales	Iamiaceae	Iamia	311	7	9	2	5	1	1	7	9	3	9	7	8	8	5	0	5	1	1	6	1	4	2	2	7	0	2	10	7	1	5	0	0	1	5	3	1	4	13	1	0	1	0
Otu01415	Bacteria	Chloroflexi	Chloroflexia	Thermomicrobiales	AKYG1722	AKYG1722_ge	1299	0	8	2	5	17	27	9	4	8	7	84	186	36	2	1	1	15	3	4	124	4	0	0	6	3	96	12	4	0	3	1	1	3	0	1	102	2	1	3	3	1	0
Otu01416	Bacteria	Chloroflexi	Anaerolineae	Anaerolineales	Anaerolineaceae	UTCFX1	86	1	0	1	0	0	1	0	0	4	4	2	0	0	0	0	0	1	1	0	1	0	0	0	0	0	1	0	0	0	1	0	11	3	0	0	0	1	0	0	0	4	1
Otu01417	Bacteria	Chloroflexi	Anaerolineae	SBR1031	A4b	A4b_ge	384	0	0	0	0	0	0	2	2	4	2	12	19	7	77	1	20	13	1	1	0	1	0	0	2	1	4	0	2	2	9	3	3	4	0	0	0	0	0	3	17	9	12
Otu01418	Bacteria	Proteobacteria	Gammaproteobacteria	Gammaproteobacteria_unclassified	Gammaproteobacteria_unclassified	Gammaproteobacteria_unclassified	89	0	0	0	1	0	0	0	1	0	0	9	3	6	8	3	0	2	0	0	0	0	0	0	0	1	3	0	3	2	1	0	2	0	0	0	0	0	0	2	2	1	2
Otu01419	Bacteria	Bacteroidetes	Bacteroidia	Chitinophagales	Chitinophagaceae	Chitinophagaceae_unclassified	1358	287	222	104	5	2	25	0	1	18	1	30	1	6	1	4	1	1	44	25	1	2	2	3	7	0	0	1	1	0	0	5	0	2	137	13	0	0	0	0	1	0	0
Otu01420	Archaea	Thaumarchaeota	Nitrososphaeria	Nitrososphaerales	Nitrososphaeraceae	Nitrososphaeraceae_ge	884	0	0	1	0	0	0	10	88	102	28	4	0	6	59	23	2	1	0	1	0	0	39	50	13	5	1	9	36	13	8	2	0	5	0	7	0	9	0	5	1	1	0
Otu01421	Bacteria	Actinobacteria	Acidimicrobiia	uncultured	uncultured_fa	uncultured_ge	640	0	5	6	17	7	6	47	22	39	27	19	5	5	13	7	4	2	0	3	3	12	12	6	11	7	5	3	13	10	9	1	0	0	0	6	1	4	2	3	3	2	0
Otu01422	Bacteria	Rokubacteria	NC10	Rokubacteriales	Rokubacteriales_fa	Rokubacteriales_ge	700	1	0	0	0	0	0	0	11	20	40	14	4	4	20	23	3	1	2	0	0	0	3	9	0	7	4	9	29	17	19	2	2	11	0	0	0	1	0	4	6	7	21
Otu01423	Bacteria	Proteobacteria	Gammaproteobacteria	Betaproteobacteriales	uncultured	uncultured_ge	647	0	0	1	1	0	0	18	48	120	15	1	3	3	10	2	2	2	0	0	0	1	33	69	20	2	1	24	12	1	0	0	0	1	0	0	0	8	16	2	2	1	0
Otu01424	Bacteria	Actinobacteria	Thermoleophilia	Gaiellales	uncultured	uncultured_ge	246	0	0	0	0	0	0	4	1	2	5	1	5	8	3	2	3	3	0	0	0	2	1	0	2	1	1	6	4	2	5	2	6	35	1	0	0	0	1	1	0	4	6
Otu01425	Bacteria	Proteobacteria	Deltaproteobacteria	Bdellovibrionales	Bacteriovoracaceae	Bacteriovorax	237	0	3	5	2	2	1	5	2	12	3	2	0	0	4	2	5	3	2	5	0	2	2	0	2	0	0	0	1	0	2	0	0	0	4	1	0	0	0	1	1	3	2
Otu01426	Bacteria	Planctomycetes	Phycisphaerae	Phycisphaerales	Phycisphaeraceae	Phycisphaeraceae_unclassified	324	0	0	0	1	1	1	2	3	5	21	22	14	6	24	8	27	5	0	1	0	1	1	0	0	6	18	4	6	3	14	0	0	0	0	0	1	2	2	7	10	4	6
Otu01427	Bacteria	Proteobacteria	Deltaproteobacteria	Deltaproteobacteria_unclassified	Deltaproteobacteria_unclassified	Deltaproteobacteria_unclassified	818	0	0	1	0	0	0	0	0	3	9	19	9	21	22	49	111	21	0	0	0	0	0	0	0	1	13	1	52	5	30	1	1	5	0	0	0	1	4	27	16	4	5
Otu01428	Bacteria	Planctomycetes	Planctomycetacia	Pirellulales	Pirellulaceae	Pir4_lineage	1145	0	32	26	21	41	53	37	31	21	9	23	4	5	1	1	0	2	1	34	63	18	18	16	27	10	2	0	0	1	0	0	0	1	0	30	37	12	0	0	2	0	0
Otu01429	Bacteria	Acidobacteria	Subgroup_6	Subgroup_6_unclassified	Subgroup_6_unclassified	Subgroup_6_unclassified	88	4	6	3	1	2	1	6	1	6	2	1	3	0	1	1	0	1	1	3	1	0	1	0	1	1	0	1	0	0	0	0	0	1	2	4	0	1	2	0	0	0	0
Otu01430	Bacteria	Gemmatimonadetes	Gemmatimonadetes	Gemmatimonadales	Gemmatimonadaceae	uncultured	1508	2	90	73	18	27	22	15	33	58	17	35	78	18	25	13	16	18	8	15	44	5	15	10	19	2	16	3	16	12	43	0	21	7	3	12	16	4	5	8	32	6	5
Otu01431	Bacteria	Acidobacteria	Subgroup_17	Subgroup_17_or	Subgroup_17_fa	Subgroup_17_ge	821	0	0	0	0	0	1	0	3	0	1	0	3	4	69	40	253	17	0	0	0	0	0	0	0	0	0	1	10	1	8	5	6	16	0	0	0	0	0	16	22	4	110
Otu01432	Bacteria	Firmicutes	Bacilli	Bacillales	Paenibacillaceae	Paenibacillus	283	0	0	1	0	0	5	0	9	21	18	6	12	6	10	4	2	2	0	0	3	2	21	6	3	4	4	7	1	2	6	3	0	0	0	0	3	1	2	1	0	11	3
Otu01433	Bacteria	Chloroflexi	Anaerolineae	Anaerolineales	Anaerolineaceae	uncultured	617	0	0	1	1	3	4	11	33	65	12	15	52	7	22	2	8	5	0	0	1	3	3	4	5	2	11	0	14	1	11	3	21	55	0	0	0	3	1	6	13	15	4
Otu01434	Bacteria	Proteobacteria	Gammaproteobacteria	Betaproteobacteriales	SC-I-84	SC-I-84_ge	280	6	10	8	5	0	2	2	4	17	10	0	1	4	1	0	1	1	3	5	1	0	6	10	2	2	0	2	4	1	0	0	0	0	11	9	0	9	6	1	0	1	0
Otu01435	Bacteria	Firmicutes	Bacilli	Bacillales	Bacillaceae	Bacillus	323	0	3	9	4	1	10	1	4	19	13	4	7	2	7	8	4	0	0	0	1	1	1	3	0	2	3	4	4	3	8	0	0	9	7	1	2	2	2	1	2	2	4
Otu01436	Bacteria	Proteobacteria	Deltaproteobacteria	Deltaproteobacteria_unclassified	Deltaproteobacteria_unclassified	Deltaproteobacteria_unclassified	441	0	0	0	0	4	4	9	6	38	19	11	20	4	6	7	6	0	1	0	6	2	0	2	1	2	70	0	4	3	8	0	0	1	0	2	1	9	4	1	1	1	2
Otu01437	Bacteria	Acidobacteria	Subgroup_6	Subgroup_6_or	Subgroup_6_fa	Subgroup_6_ge	301	8	7	4	3	4	4	14	8	11	11	6	13	4	0	0	3	3	1	6	1	3	4	11	1	2	1	1	0	0	0	0	0	0	4	1	2	5	1	0	0	0	1
Otu01438	Bacteria	Actinobacteria	Thermoleophilia	Gaiellales	uncultured	uncultured_ge	573	0	6	3	0	0	1	14	61	52	29	8	20	12	14	9	0	9	2	2	2	0	47	6	9	5	9	10	12	0	4	0	0	1	0	2	0	3	1	3	0	0	0
Otu01439	Bacteria	Planctomycetes	Planctomycetacia	Pirellulales	Pirellulaceae	Rhodopirellula	591	0	0	0	0	0	5	7	32	100	69	12	2	7	7	8	4	2	0	0	0	3	10	20	8	6	8	5	24	9	5	0	0	0	0	0	1	1	9	2	4	1	18
Otu01440	Bacteria	Chloroflexi	Anaerolineae	Anaerolineales	Anaerolineaceae	UTCFX1	83	1	1	1	0	0	0	1	0	4	1	0	0	0	0	3	0	2	1	1	0	0	3	0	0	0	0	0	1	0	1	0	0	0	0	1	0	0	2	0	1	11	3
Otu01441	Bacteria	Planctomycetes	Planctomycetacia	Pirellulales	Pirellulaceae	Pirellula	441	4	15	15	9	1	5	0	0	13	10	20	4	5	0	1	0	0	2	16	0	3	1	2	2	2	0	1	1	0	0	0	0	1	18	22	19	17	0	0	3	0	0
Otu01442	Bacteria	Bacteria_unclassified	Bacteria_unclassified	Bacteria_unclassified	Bacteria_unclassified	Bacteria_unclassified	549	0	0	4	1	0	2	38	31	57	31	3	5	6	11	3	0	3	1	2	0	5	15	24	10	1	0	8	13	9	1	0	1	1	0	3	5	5	4	2	4	2	1
Otu01443	Bacteria	Chloroflexi	Anaerolineae	Ardenticatenales	uncultured	uncultured_ge	704	0	21	11	7	14	13	25	15	44	15	20	29	15	23	12	7	3	0	9	10	2	8	11	4	1	29	5	13	2	16	10	0	0	0	1	2	0	0	12	6	1	1
Otu01444	Bacteria	Bacteria_unclassified	Bacteria_unclassified	Bacteria_unclassified	Bacteria_unclassified	Bacteria_unclassified	609	0	11	20	3	16	7	4	5	40	7	12	33	12	13	4	14	6	1	7	13	5	7	8	5	5	19	0	10	1	2	0	0	3	0	9	1	5	2	2	1	1	11
Otu01445	Bacteria	Proteobacteria	Gammaproteobacteria	Oceanospirillales	Pseudohongiellaceae	Pseudohongiella	603	0	0	0	0	0	1	1	1	3	2	1	23	8	58	12	89	6	1	1	1	1	0	0	0	0	3	0	23	4	33	0	5	2	0	0	0	0	0	13	78	8	32
Otu01446	Bacteria	Chloroflexi	Anaerolineae	RBG-13-54-9	RBG-13-54-9_fa	RBG-13-54-9_ge	554	0	0	0	0	0	0	0	0	0	0	0	0	0	0	1	1	0	0	0	0	0	0	0	0	0	2	0	19	0	54	0	8	49	0	0	0	0	0	3	3	1	28
Otu01447	Bacteria	Bacteria_unclassified	Bacteria_unclassified	Bacteria_unclassified	Bacteria_unclassified	Bacteria_unclassified	144	0	0	1	0	0	0	4	12	30	6	5	3	2	0	1	0	1	0	0	0	0	2	7	3	1	0	2	2	2	0	0	0	1	0	0	0	0	1	1	0	0	1
Otu01448	Bacteria	Rokubacteria	NC10	Rokubacteriales	Rokubacteriales_fa	Rokubacteriales_ge	499	0	1	4	8	2	2	43	36	34	19	12	33	16	0	0	1	4	0	0	2	6	3	8	1	7	18	29	5	0	0	0	0	0	0	5	3	3	30	0	0	1	1
Otu01449	Bacteria	Bacteria_unclassified	Bacteria_unclassified	Bacteria_unclassified	Bacteria_unclassified	Bacteria_unclassified	1736	0	1	0	0	0	0	0	0	5	9	15	25	47	84	131	372	6	0	0	0	0	0	0	0	0	20	19	62	22	101	42	1	7	0	0	0	0	0	44	87	10	50
Otu01450	Bacteria	Patescibacteria	Parcubacteria	Parcubacteria_unclassified	Parcubacteria_unclassified	Parcubacteria_unclassified	331	0	0	0	0	0	0	0	0	2	2	3	0	10	26	7	8	5	0	0	0	0	0	0	0	0	7	0	7	0	14	0	2	3	0	0	0	0	0	11	100	1	1
Otu01451	Bacteria	Proteobacteria	Alphaproteobacteria	Tistrellales	Geminicoccaceae	uncultured	392	2	9	2	1	6	11	33	16	16	7	33	19	4	0	2	0	5	2	2	3	10	4	2	8	5	7	4	0	1	0	0	0	0	1	0	4	6	3	0	0	0	0
Otu01452	Bacteria	Proteobacteria	Alphaproteobacteria	Caulobacterales	Caulobacteraceae	uncultured	292	27	10	5	3	0	4	1	4	11	2	10	2	2	1	12	1	6	8	4	1	0	1	1	0	0	0	0	3	2	8	0	0	2	6	6	0	0	0	3	4	1	0
Otu01453	Bacteria	Actinobacteria	Actinobacteria	Frankiales	Geodermatophilaceae	Modestobacter	320	55	17	7	0	0	10	0	1	11	1	14	1	0	0	4	1	3	12	6	0	1	2	0	1	1	1	1	1	0	0	1	0	0	26	3	2	0	0	1	0	1	0
Otu01454	Bacteria	Chloroflexi	Dehalococcoidia	SAR202_clade	SAR202_clade_fa	SAR202_clade_ge	1020	0	0	0	0	0	0	0	1	45	27	8	2	26	45	61	58	6	0	0	0	0	0	0	0	3	9	3	121	11	86	3	2	2	0	0	0	0	1	59	25	4	8
Otu01455	Bacteria	Proteobacteria	Gammaproteobacteria	Acidiferrobacterales	Acidiferrobacteraceae	Sulfurifustis	84	0	0	0	0	0	0	0	1	0	1	3	2	0	0	0	0	5	0	0	0	0	0	0	0	1	5	0	3	0	3	0	16	6	0	0	0	0	0	0	0	2	1
Otu01456	Bacteria	Acidobacteria	Blastocatellia_(Subgroup_4)	Blastocatellales	Blastocatellaceae	Blastocatellaceae_unclassified	515	133	53	10	10	2	10	0	0	16	2	20	0	2	0	1	1	1	14	8	3	0	1	0	3	0	0	0	0	0	0	6	0	0	66	6	0	0	0	0	0	0	1
Otu01457	Bacteria	Chloroflexi	KD4-96	KD4-96_or	KD4-96_fa	KD4-96_ge	998	17	6	12	3	3	2	101	21	47	55	14	2	6	0	4	0	2	17	6	0	12	43	16	15	22	0	3	10	2	0	0	0	1	11	4	7	47	0	0	1	0	0
Otu01458	Bacteria	Proteobacteria	Deltaproteobacteria	Syntrophobacterales	Syntrophaceae	Syntrophus	270	0	0	0	0	0	0	0	0	2	0	0	1	1	0	0	5	5	0	0	0	0	0	0	0	0	1	0	4	3	10	0	29	8	0	2	0	0	0	2	3	14	17
Otu01459	Bacteria	Planctomycetes	Planctomycetacia	Pirellulales	Pirellulaceae	Pirellula	636	0	2	2	1	0	1	2	0	124	45	31	8	8	14	12	2	1	2	6	0	3	14	22	8	3	0	3	4	1	0	0	0	0	2	1	0	4	6	4	0	1	2
Otu01460	Bacteria	Chloroflexi	Anaerolineae	Anaerolineales	Anaerolineaceae	uncultured	783	0	0	0	0	0	0	0	0	1	1	0	1	1	0	0	1	5	0	0	0	0	1	0	0	0	0	0	2	0	1	0	38	17	0	0	0	0	0	1	0	19	10
Otu01461	Bacteria	Bacteroidetes	Bacteroidia	Bacteroidales	Prolixibacteraceae	BSV13	408	4	2	1	1	2	3	2	13	12	1	1	0	1	0	1	0	0	6	7	9	3	6	1	3	2	4	9	10	3	0	0	0	0	23	4	3	1	4	1	0	2	1
Otu01462	Bacteria	Proteobacteria	Deltaproteobacteria	Myxococcales	Haliangiaceae	Haliangium	566	0	2	0	1	2	0	9	0	6	1	7	17	8	21	45	35	16	0	0	0	0	1	0	0	1	10	0	15	3	14	1	16	16	0	0	0	1	2	9	28	8	18
Otu01463	Bacteria	Proteobacteria	Alphaproteobacteria	Rhizobiales	Rhizobiales_Incertae_Sedis	Bauldia	863	0	0	1	0	0	0	0	0	10	14	11	3	8	44	88	166	15	0	0	0	0	0	0	1	1	3	7	51	20	49	13	2	4	0	0	0	0	0	15	47	18	50
Otu01464	Bacteria	BRC1	BRC1_cl	BRC1_or	BRC1_fa	BRC1_ge	1298	0	0	0	0	0	0	0	1	10	24	28	32	21	144	71	113	16	0	0	0	0	0	0	0	7	12	6	62	14	76	15	5	7	0	0	0	0	0	59	100	7	6
Otu01465	Bacteria	Actinobacteria	Acidimicrobiia	IMCC26256	IMCC26256_fa	IMCC26256_ge	498	0	1	2	3	11	2	1	4	2	4	5	6	1	21	4	46	16	0	0	6	0	1	1	0	0	0	0	2	2	12	24	9	10	0	0	18	0	1	5	29	24	4
Otu01466	Bacteria	Bacteroidetes	Bacteroidia	Bacteroidales	Bacteroidetes_BD2-2	Bacteroidetes_BD2-2_ge	1438	0	0	0	0	0	0	0	0	1	2	5	2	0	12	5	28	11	0	0	0	0	4	0	0	1	7	1	19	9	8	2	25	23	0	0	0	0	0	19	32	8	3
Otu01467	Bacteria	Bacteroidetes	Bacteroidia	Bacteroidales	Prolixibacteraceae	Sunxiuqinia	1472	0	0	0	0	0	0	2	0	3	1	20	39	14	38	65	83	8	0	0	0	0	0	0	0	1	20	8	15	4	53	9	1	3	0	0	0	0	0	73	269	16	6
Otu01468	Bacteria	Gemmatimonadetes	Gemmatimonadetes	Gemmatimonadales	Gemmatimonadaceae	uncultured	1033	1	1	4	2	0	0	21	49	76	42	4	17	18	28	36	1	7	0	0	0	4	26	33	16	8	3	30	60	9	24	4	9	9	1	2	0	7	22	16	7	5	3
Otu01469	Bacteria	Proteobacteria	Deltaproteobacteria	Oligoflexales	0319-6G20	0319-6G20_ge	165	9	0	0	0	1	0	3	2	31	6	2	1	2	0	0	0	1	4	1	0	1	4	2	3	0	0	0	0	0	0	0	0	0	3	3	3	0	1	1	1	0	0
Otu01470	Bacteria	Bacteroidetes	Ignavibacteria	Kryptoniales	BSV26	BSV26_ge	317	0	0	0	0	0	0	0	0	0	1	0	0	0	0	0	3	5	0	0	0	0	0	0	0	0	1	0	3	0	7	0	15	11	0	0	0	0	0	3	2	17	85
Otu01471	Bacteria	Bacteroidetes	Bacteroidia	Sphingobacteriales	NS11-12_marine_group	NS11-12_marine_group_ge	1077	1	0	2	3	30	6	7	18	23	34	36	44	7	37	27	24	12	0	0	1	1	2	9	3	7	27	10	38	9	34	6	3	11	0	0	7	5	9	14	50	7	4
Otu01472	Bacteria	Proteobacteria	Alphaproteobacteria	Rhodobacterales	Rhodobacteraceae	uncultured	666	64	36	11	1	92	42	2	0	3	0	1	0	1	0	0	0	0	37	5	15	3	1	3	10	0	0	0	0	0	0	2	0	0	29	2	14	0	0	0	1	0	0
Otu01473	Bacteria	Proteobacteria	Deltaproteobacteria	Myxococcales	Eel-36e1D6	Eel-36e1D6_ge	400	0	0	0	0	0	2	10	12	18	16	17	19	15	23	17	8	0	0	0	0	0	2	3	0	3	6	4	16	6	7	4	0	2	0	0	0	0	0	5	12	2	8
Otu01474	Bacteria	Actinobacteria	Actinobacteria	Frankiales	Geodermatophilaceae	Geodermatophilus	357	56	25	1	1	1	2	0	0	7	0	13	0	2	1	5	1	2	26	3	2	0	1	0	2	2	6	1	1	0	1	1	1	8	13	2	0	0	0	0	0	0	0
Otu01475	Bacteria	Proteobacteria	Gammaproteobacteria	Betaproteobacteriales	Gallionellaceae	Gallionellaceae_unclassified	85	0	0	0	0	0	0	0	0	0	0	0	0	0	0	0	0	3	0	0	0	0	0	0	0	0	0	0	1	0	0	0	2	45	0	0	0	0	0	0	0	12	3
Otu01476	Bacteria	Bacteroidetes	Bacteroidia	Sphingobacteriales	Lentimicrobiaceae	Lentimicrobiaceae_ge	694	0	0	0	0	0	0	0	0	0	1	0	0	0	0	0	2	2	0	0	0	0	0	0	0	0	0	0	0	0	1	0	384	58	0	0	0	0	0	5	13	20	77
Otu01477	Bacteria	Proteobacteria	Alphaproteobacteria	Sneathiellales	Sneathiellaceae	Sneathiella	1149	0	0	0	0	0	0	0	0	6	2	1	11	11	33	49	26	1	0	0	0	0	0	0	0	1	2	0	8	2	115	0	6	1	0	0	0	0	0	76	387	12	2
Otu01478	Bacteria	Planctomycetes	Phycisphaerae	CCM11a	CCM11a_fa	CCM11a_ge	1588	0	0	0	0	0	0	0	1	4	4	96	118	104	33	67	5	17	0	0	0	0	0	1	0	18	86	29	82	15	13	1	1	3	0	0	0	1	18	47	19	7	15
Otu01479	Bacteria	Proteobacteria	Gammaproteobacteria	Oceanospirillales	Pseudohongiellaceae	BIyi10	606	2	17	13	0	3	6	1	7	3	0	3	4	2	20	4	62	53	2	2	2	0	1	1	2	0	0	0	1	0	12	2	52	44	0	1	0	0	1	6	21	18	12
Otu01480	Bacteria	Bacteroidetes	Bacteroidia	Cytophagales	Microscillaceae	Ohtaekwangia	349	41	16	3	0	2	7	0	1	9	10	8	0	2	0	0	1	0	19	6	2	0	2	0	2	0	0	0	0	0	0	0	0	0	44	3	0	0	0	0	0	0	0
Otu01481	Bacteria	Acidobacteria	Acidobacteriia	Solibacterales	Solibacteraceae_(Subgroup_3)	Solibacteraceae_(Subgroup_3)_unclassified	543	0	0	0	0	0	0	2	0	2	1	6	2	7	16	10	47	16	0	0	0	0	0	0	0	0	6	0	6	2	24	8	19	2	0	0	0	0	0	9	16	19	50
Otu01482	Bacteria	Bacteroidetes	Bacteroidia	Chitinophagales	Saprospiraceae	uncultured	811	0	0	0	0	0	0	45	95	225	66	7	0	10	22	17	13	5	0	0	0	0	11	18	7	4	1	0	9	0	1	0	0	3	0	0	0	7	10	2	1	2	0
Otu01483	Bacteria	Proteobacteria	Alphaproteobacteria	Alphaproteobacteria_unclassified	Alphaproteobacteria_unclassified	Alphaproteobacteria_unclassified	81	0	0	0	0	0	0	0	0	0	1	0	0	2	8	14	4	2	0	0	0	0	0	0	0	0	0	0	1	2	11	2	1	1	0	0	0	0	0	0	1	2	1
Otu01484	Bacteria	Chloroflexi	Anaerolineae	SBR1031	A4b	A4b_ge	582	0	0	0	0	0	0	1	0	13	29	17	19	15	65	5	80	17	0	0	0	0	1	1	0	1	4	1	4	3	8	4	1	16	0	0	0	0	3	1	19	48	35
Otu01485	Bacteria	Proteobacteria	Alphaproteobacteria	Alphaproteobacteria_unclassified	Alphaproteobacteria_unclassified	Alphaproteobacteria_unclassified	618	0	21	15	19	24	16	6	10	33	23	5	12	7	37	31	27	4	0	7	9	4	2	2	8	1	1	0	8	3	16	3	0	0	0	1	1	0	0	9	20	1	13
Otu01486	Bacteria	Proteobacteria	Gammaproteobacteria	Salinisphaerales	Salinisphaeraceae	Salinisphaera	1178	0	0	0	0	0	0	0	0	11	104	13	5	17	68	37	8	7	0	0	0	1	0	0	0	21	21	50	231	47	22	7	0	1	0	0	0	0	0	3	2	1	1
Otu01487	Bacteria	Zixibacteria	Zixibacteria_cl	Zixibacteria_or	Zixibacteria_fa	Zixibacteria_ge	813	0	0	0	0	0	0	0	0	0	0	0	0	0	0	0	0	2	0	0	0	0	0	0	0	0	2	0	16	0	27	1	5	302	0	0	0	0	0	4	2	5	105
Otu01488	Bacteria	Planctomycetes	Planctomycetes_unclassified	Planctomycetes_unclassified	Planctomycetes_unclassified	Planctomycetes_unclassified	506	0	0	0	0	3	7	12	3	6	0	5	9	3	0	2	22	6	0	0	6	4	2	2	1	4	13	3	18	7	24	10	7	2	0	6	5	0	3	9	25	11	8
Otu01489	Bacteria	Bacteroidetes	Ignavibacteria	Ignavibacteriales	Ignavibacteriales_unclassified	Ignavibacteriales_unclassified	946	0	0	0	0	0	0	0	0	0	6	0	0	0	1	0	1	6	0	0	0	0	0	0	0	0	1	0	8	0	22	0	67	375	0	0	0	0	0	7	2	6	31
Otu01490	Bacteria	Chloroflexi	OLB14	OLB14_or	OLB14_fa	OLB14_ge	537	1	11	30	8	4	6	2	4	21	22	52	11	4	2	5	0	1	0	6	13	0	5	9	11	2	35	0	4	3	0	1	0	0	0	2	8	11	6	0	2	0	0
Otu01491	Bacteria	Planctomycetes	Planctomycetacia	Pirellulales	Pirellulaceae	Pirellulaceae_unclassified	261	0	0	0	2	1	3	3	2	4	9	4	3	1	14	1	9	1	0	1	6	4	1	1	3	0	2	4	12	0	1	0	16	8	0	2	0	1	4	0	0	16	0
Otu01492	Bacteria	Elusimicrobia	Elusimicrobia	Lineage_IV	Lineage_IV_fa	Lineage_IV_ge	826	0	1	2	5	2	11	35	26	72	58	34	16	9	10	23	49	9	0	0	3	1	5	9	7	13	3	1	18	4	4	2	1	3	1	26	11	13	7	1	5	0	3
Otu01493	Bacteria	Proteobacteria	Deltaproteobacteria	Myxococcales	Polyangiaceae	Polyangium	292	34	4	3	3	3	4	11	3	4	5	10	1	4	0	1	0	0	4	0	7	6	1	0	2	4	3	3	3	0	0	2	0	4	21	18	4	2	2	0	0	0	0
Otu01494	Bacteria	Bacteroidetes	Bacteroidia	Chitinophagales	uncultured	uncultured_ge	780	0	0	0	0	0	2	2	4	32	38	17	18	18	44	40	31	9	0	0	0	0	2	4	1	7	14	6	50	7	54	5	4	2	0	0	0	1	6	19	29	8	6
Otu01495	Bacteria	Proteobacteria	Deltaproteobacteria	Myxococcales	Archangiaceae	Anaeromyxobacter	431	6	18	9	3	4	2	7	15	13	4	15	14	6	4	4	1	1	4	2	3	4	7	2	2	1	20	1	7	0	4	0	0	0	3	5	3	9	5	2	4	6	1
Otu01496	Bacteria	Actinobacteria	Thermoleophilia	Gaiellales	uncultured	uncultured_ge	563	0	2	5	1	1	0	25	40	56	16	1	1	9	16	16	0	2	0	0	0	0	9	17	9	6	0	20	44	5	5	0	2	1	0	0	2	5	3	5	3	6	3
Otu01497	Bacteria	Proteobacteria	Deltaproteobacteria	Myxococcales	Sandaracinaceae	uncultured	441	11	43	15	2	9	3	0	1	3	1	1	0	2	0	1	0	0	27	11	5	0	0	2	0	0	0	0	0	0	0	0	0	0	36	6	4	2	0	0	0	0	0
Otu01498	Bacteria	Bacteroidetes	Bacteroidia	Cytophagales	Microscillaceae	Microscillaceae_unclassified	495	113	12	2	2	0	23	0	0	4	12	17	1	2	0	1	2	7	16	15	0	1	1	0	4	0	0	0	0	0	0	2	0	1	23	6	1	0	2	0	1	1	0
Otu01499	Bacteria	Planctomycetes	Phycisphaerae	CCM11a	CCM11a_fa	CCM11a_ge	1590	0	7	13	11	179	68	34	8	19	24	72	107	28	11	15	16	12	0	1	119	10	8	9	10	5	36	1	20	1	7	0	0	3	0	4	30	14	4	4	9	4	5
Otu01500	Bacteria	Bacteroidetes	Rhodothermia	Rhodothermales	Rhodothermaceae	uncultured	591	0	0	0	0	10	49	26	16	54	47	2	0	4	14	0	1	4	0	0	19	11	0	4	2	5	16	5	24	4	8	0	1	0	0	0	0	0	4	3	1	1	14
Otu01501	Bacteria	Chloroflexi	Dehalococcoidia	S085	S085_fa	S085_ge	303	0	0	0	0	0	0	0	0	3	1	0	0	0	1	11	1	3	0	0	0	0	0	0	0	0	0	0	3	2	6	3	20	6	0	0	0	0	0	2	5	11	82
Otu01502	Bacteria	Chloroflexi	Anaerolineae	Anaerolineales	Anaerolineaceae	uncultured	982	0	0	0	0	0	0	0	1	4	9	12	7	25	4	16	1	336	0	0	0	0	0	0	2	2	3	21	9	0	13	3	1	1	0	0	0	0	16	6	6	10	1
Otu01503	Bacteria	Proteobacteria	Deltaproteobacteria	Myxococcales	Archangiaceae	Anaeromyxobacter	1075	1	1	0	0	0	0	0	0	0	1	0	0	0	0	0	0	1	0	0	0	0	0	0	0	0	4	0	25	0	56	0	212	64	0	0	0	0	0	7	3	4	1
Otu01504	Bacteria	Proteobacteria	Gammaproteobacteria	Salinisphaerales	Solimonadaceae	uncultured	80	0	0	0	0	0	0	0	0	2	4	13	5	2	2	1	6	2	0	0	0	0	0	0	0	2	1	0	2	0	0	0	0	0	0	0	0	0	1	0	0	0	0
Otu01505	Archaea	Euryarchaeota	Thermoplasmata	uncultured	uncultured_fa	uncultured_ge	685	0	0	0	0	0	0	1	20	203	139	17	10	6	41	6	1	1	0	0	0	0	12	14	5	3	0	3	21	7	3	0	0	1	0	0	0	1	5	2	0	2	0
Otu01506	Bacteria	Chloroflexi	Anaerolineae	SBR1031	SBR1031_fa	SBR1031_ge	1385	0	0	0	0	0	0	4	4	13	6	17	59	24	10	32	20	481	0	0	0	1	4	0	4	7	8	1	8	0	7	0	5	4	0	0	1	1	3	7	14	4	1
Otu01507	Bacteria	Bacteroidetes	Rhodothermia	Balneolales	Balneolaceae	uncultured	340	0	0	0	0	1	0	1	0	7	9	5	26	10	18	14	5	3	0	0	0	0	0	0	0	1	37	3	6	3	11	5	1	0	0	0	0	0	0	9	11	6	13
Otu01508	Bacteria	Proteobacteria	Alphaproteobacteria	Rhodospirillales	Magnetospiraceae	uncultured	507	0	3	3	1	4	2	0	3	8	31	20	17	10	24	9	73	7	0	5	3	2	0	0	7	1	22	0	5	2	3	9	6	7	0	1	4	1	0	5	7	19	14
Otu01509	Bacteria	Hydrogenedentes	Hydrogenedentia	Hydrogenedentiales	Hydrogenedensaceae	Hydrogenedensaceae_ge	599	0	0	1	0	2	12	17	2	12	13	15	27	8	51	25	23	10	0	0	5	5	0	0	3	1	2	0	9	6	33	6	1	1	0	1	10	3	1	13	41	3	25
Otu01510	Bacteria	Gemmatimonadetes	Gemmatimonadetes	Gemmatimonadales	Gemmatimonadaceae	uncultured	731	4	2	3	4	6	6	55	66	107	33	11	1	8	5	5	2	1	0	1	1	7	20	20	9	5	1	3	17	2	9	1	0	0	3	12	3	9	7	0	2	0	1
Otu01511	Bacteria	Nitrospirae	Thermodesulfovibrionia	uncultured	uncultured_fa	uncultured_ge	803	0	0	0	0	0	0	0	0	0	2	0	0	2	3	6	3	3	0	0	0	0	0	0	0	0	2	10	15	0	29	5	9	256	0	0	0	0	1	3	2	3	37
Otu01512	Bacteria	Proteobacteria	Alphaproteobacteria	Rhizobiales	Devosiaceae	Devosiaceae_unclassified	438	14	37	36	14	15	19	2	1	5	3	3	2	7	0	0	0	1	10	13	21	2	1	1	7	0	1	1	0	0	0	0	1	5	10	4	7	1	0	0	0	0	0
Otu01513	Bacteria	Omnitrophicaeota	Omnitrophicaeota_cl	Omnitrophicaeota_or	Omnitrophicaeota_fa	Omnitrophicaeota_ge	508	0	0	0	0	1	2	4	3	10	21	17	3	11	29	18	21	7	0	0	2	0	2	3	0	2	11	5	34	1	16	2	7	1	0	0	0	0	0	17	23	4	8
Otu01514	Bacteria	Chloroflexi	Dehalococcoidia	S085	S085_fa	S085_ge	372	4	7	4	2	1	2	2	7	12	16	8	1	2	6	1	12	4	5	2	2	1	1	1	2	1	2	3	19	1	4	0	2	7	1	1	1	4	7	1	5	13	17
Otu01515	Bacteria	Firmicutes	Clostridia	Clostridiales	Clostridiaceae_1	Clostridium_sensu_stricto_8	210	0	2	0	1	18	8	2	3	2	3	11	11	1	0	2	1	0	4	0	1	0	4	0	0	0	5	2	1	1	1	1	0	6	1	3	2	0	0	0	0	1	1
Otu01516	Bacteria	Actinobacteria	Acidimicrobiia	Microtrichales	Microtrichaceae	Sva0996_marine_group	1107	0	0	1	0	2	3	9	19	55	67	26	112	21	79	18	48	13	0	0	6	4	2	9	7	6	14	0	19	21	42	13	1	12	0	0	3	4	3	12	21	3	55
Otu01517	Bacteria	Planctomycetes	Planctomycetacia	Pirellulales	Pirellulaceae	Rhodopirellula	190	0	3	4	1	3	4	5	7	17	7	4	1	0	1	2	0	1	5	6	1	5	7	8	3	0	1	0	0	0	0	2	0	0	1	6	2	3	0	1	0	0	3
Otu01518	Bacteria	Planctomycetes	Planctomycetacia	Pirellulales	Pirellulaceae	uncultured	508	4	9	18	5	3	5	17	16	29	11	4	5	0	0	2	6	1	7	16	5	4	22	37	6	3	8	4	1	1	0	0	0	0	7	6	2	2	0	0	0	0	0
Otu01519	Bacteria	Chloroflexi	Anaerolineae	SBR1031	SBR1031_fa	SBR1031_ge	1174	0	0	0	0	0	0	0	0	7	4	5	11	25	101	171	136	12	0	0	0	0	0	0	0	5	10	5	75	3	38	3	1	1	0	0	0	0	0	33	23	4	81
Otu01520	Bacteria	Verrucomicrobia	Verrucomicrobiae	Pedosphaerales	Pedosphaeraceae	Pedosphaeraceae_ge	710	0	0	1	1	6	4	4	12	16	75	19	29	13	27	17	28	35	0	0	2	3	0	1	0	5	29	1	9	3	41	0	14	18	0	0	1	1	2	4	8	3	6
Otu01521	Bacteria	Chloroflexi	Anaerolineae	SBR1031	SBR1031_fa	SBR1031_ge	709	0	9	18	3	1	2	3	0	10	2	9	14	14	1	1	0	16	3	13	1	3	2	0	0	0	8	1	3	0	12	0	35	88	0	4	11	8	2	2	4	2	10
Otu01522	Bacteria	Verrucomicrobia	Verrucomicrobiae	Verrucomicrobiales	DEV007	DEV007_ge	530	0	1	6	11	6	4	5	7	21	22	26	18	12	23	9	5	7	0	1	2	2	0	0	0	3	28	0	29	2	7	0	0	1	0	5	0	1	1	13	9	4	0
Otu01523	Bacteria	Bacteroidetes	Bacteroidia	Flavobacteriales	Cryomorphaceae	uncultured	494	0	2	0	0	1	2	7	1	10	9	9	9	4	26	11	4	5	0	0	0	0	0	0	0	3	6	4	28	3	4	2	3	8	0	0	0	0	3	3	22	43	8
Otu01524	Bacteria	Planctomycetes	OM190	OM190_or	OM190_fa	OM190_ge	963	0	0	0	0	1	4	2	1	23	21	36	129	38	62	56	37	10	0	0	2	1	0	2	0	13	17	15	41	10	14	15	0	0	0	0	1	0	5	8	21	6	10
Otu01525	Bacteria	Actinobacteria	Acidimicrobiia	uncultured	uncultured_fa	uncultured_ge	290	0	6	1	3	1	3	3	11	15	29	4	0	1	9	7	2	4	2	1	1	0	3	2	1	9	1	0	7	7	4	0	1	3	1	1	2	2	0	1	0	4	0
Otu01526	Bacteria	Gemmatimonadetes	Gemmatimonadetes	Gemmatimonadales	Gemmatimonadaceae	uncultured	1365	12	168	129	61	25	28	23	3	6	2	15	2	13	0	3	5	1	24	22	4	16	4	5	6	11	18	0	0	0	0	1	0	0	5	63	4	25	13	1	2	0	0
Otu01527	Bacteria	Proteobacteria	Deltaproteobacteria	Myxococcales	Nannocystaceae	uncultured	1052	0	23	59	32	113	71	41	26	25	8	4	6	2	1	0	0	1	1	16	44	13	23	10	13	0	0	0	0	0	1	1	0	2	0	16	19	8	1	2	0	0	2
Otu01528	Bacteria	Bacteroidetes	Bacteroidia	Bacteroidales	Bacteroidetes_BD2-2	Bacteroidetes_BD2-2_ge	615	0	1	0	0	0	0	0	0	0	1	0	1	0	0	2	10	1	0	0	0	0	1	1	0	1	7	0	3	0	4	0	44	9	1	5	2	0	0	5	44	23	35
Otu01529	Bacteria	Bacteroidetes	Bacteroidia	Bacteroidales	Prolixibacteraceae	uncultured	896	0	2	0	0	0	0	0	0	1	0	2	1	4	3	7	18	24	0	0	0	1	0	0	0	1	1	0	4	0	0	0	100	32	2	0	0	0	0	5	37	70	8
Otu01530	Bacteria	Acidobacteria	Subgroup_5	Subgroup_5_or	Subgroup_5_fa	Subgroup_5_ge	315	6	13	14	2	5	1	11	10	13	7	3	5	2	1	3	6	0	6	9	2	1	1	4	3	3	0	5	1	1	1	3	0	0	14	7	3	5	4	0	2	0	0
Otu01531	Bacteria	Proteobacteria	Gammaproteobacteria	Betaproteobacteriales	Nitrosomonadaceae	IS-44	1203	0	3	0	0	0	0	0	0	2	1	1	1	0	3	1	48	31	1	0	1	0	0	4	0	0	1	0	1	0	3	2	169	268	0	1	0	0	0	3	5	21	2
Otu01532	Bacteria	Bacteroidetes	Bacteroidia	Sphingobacteriales	NS11-12_marine_group	NS11-12_marine_group_ge	297	0	12	5	5	16	4	6	8	13	8	5	2	0	0	3	2	1	3	6	6	2	5	2	2	1	1	0	3	0	1	1	0	6	1	12	1	6	1	0	2	1	0
Otu01533	Bacteria	Chloroflexi	Chloroflexi_unclassified	Chloroflexi_unclassified	Chloroflexi_unclassified	Chloroflexi_unclassified	1899	0	0	0	0	0	0	0	0	0	0	3	3	11	189	72	283	9	0	0	0	1	0	0	0	0	4	0	49	30	128	50	10	4	0	0	0	0	0	63	326	8	97
Otu01534	Bacteria	Acidobacteria	Subgroup_22	Subgroup_22_or	Subgroup_22_fa	Subgroup_22_ge	589	0	0	1	5	0	0	27	34	42	18	10	3	1	17	18	16	9	0	0	0	1	5	14	7	8	0	4	63	7	19	5	1	1	0	4	0	13	7	5	6	2	0
Otu01535	Bacteria	Acidobacteria	Subgroup_5	Subgroup_5_or	Subgroup_5_fa	Subgroup_5_ge	372	0	0	2	0	1	2	31	17	33	20	14	1	4	17	11	23	3	0	1	2	7	4	8	2	2	1	4	18	4	4	2	0	0	0	0	1	0	1	0	0	0	0
Otu01536	Bacteria	Chloroflexi	Dehalococcoidia	S085	S085_fa	S085_ge	695	3	4	1	3	0	0	12	27	44	23	7	16	21	19	14	6	13	12	8	1	0	7	16	4	4	3	8	34	4	6	0	2	1	5	9	2	14	14	7	3	4	2
Otu01537	Bacteria	Bacteria_unclassified	Bacteria_unclassified	Bacteria_unclassified	Bacteria_unclassified	Bacteria_unclassified	343	0	0	1	1	2	4	10	4	22	31	12	56	4	9	5	10	0	0	0	1	2	2	1	0	7	3	1	13	3	4	0	1	1	0	0	1	0	1	1	6	1	0
Otu01538	Bacteria	Proteobacteria	Deltaproteobacteria	Myxococcales	Sandaracinaceae	Sandaracinus	354	1	11	1	5	1	0	1	0	9	3	4	5	6	1	9	2	5	8	7	2	0	6	4	0	6	7	1	7	0	4	2	1	3	7	4	5	5	5	0	1	0	0
Otu01539	Bacteria	Bacteroidetes	Ignavibacteria	SJA-28	SJA-28_fa	SJA-28_ge	717	3	4	8	4	5	6	1	1	11	7	3	6	1	1	9	137	45	4	5	16	5	6	3	6	2	4	0	4	0	0	1	9	7	1	10	4	3	0	1	2	103	2
Otu01540	Bacteria	Proteobacteria	Alphaproteobacteria	Elsterales	uncultured	uncultured_ge	948	165	84	17	5	5	7	0	0	15	0	9	0	1	0	1	0	0	90	19	4	0	1	2	5	0	0	0	0	0	1	2	0	1	68	8	0	0	1	0	2	1	0
Otu01541	Bacteria	Latescibacteria	Latescibacteria_cl	Latescibacteria_or	Latescibacteria_fa	Latescibacteria_ge	87	0	0	0	0	0	0	0	0	1	2	2	2	2	2	4	1	0	0	0	0	0	0	0	0	0	0	1	7	3	1	0	0	0	1	0	0	0	6	2	0	0	4
Otu01542	Bacteria	Proteobacteria	Deltaproteobacteria	Desulfarculales	Desulfarculaceae	uncultured	372	0	0	1	1	2	1	3	6	8	9	1	19	18	8	5	0	10	0	0	1	0	0	2	2	2	1	4	3	2	12	1	0	6	0	0	0	5	7	1	8	3	15
Otu01543	Bacteria	Proteobacteria	Gammaproteobacteria	R7C24	R7C24_fa	R7C24_ge	477	120	26	7	0	0	13	0	0	4	1	11	0	2	0	0	2	0	26	10	4	1	1	0	2	0	0	0	0	0	0	5	0	0	48	6	0	1	2	0	1	0	0
Otu01544	Bacteria	Chloroflexi	Anaerolineae	SBR1031	SBR1031_fa	SBR1031_ge	94	0	0	0	0	0	0	0	0	0	0	0	0	0	2	7	7	1	0	0	0	0	0	0	0	0	0	1	7	1	12	0	1	0	0	0	0	0	0	4	5	5	1
Otu01545	Bacteria	Actinobacteria	Acidimicrobiia	Acidimicrobiia_unclassified	Acidimicrobiia_unclassified	Acidimicrobiia_unclassified	1184	0	2	17	21	2	10	52	42	57	98	12	3	12	29	5	5	1	0	7	9	22	26	13	24	59	5	7	38	24	7	1	0	0	0	10	2	26	16	2	1	6	0
Otu01546	Bacteria	Chloroflexi	JG30-KF-CM66	JG30-KF-CM66_or	JG30-KF-CM66_fa	JG30-KF-CM66_ge	472	0	9	12	2	3	12	19	12	22	10	27	40	15	12	16	9	1	3	2	4	3	4	2	3	6	10	1	6	1	9	1	0	0	0	0	0	0	0	8	5	1	7
Otu01547	Bacteria	Proteobacteria	Alphaproteobacteria	Alphaproteobacteria_unclassified	Alphaproteobacteria_unclassified	Alphaproteobacteria_unclassified	537	0	0	0	0	0	0	0	0	0	3	2	1	1	0	0	0	0	0	0	0	0	0	0	0	0	4	0	3	0	1	0	31	361	0	0	0	0	0	0	1	0	0
Otu01548	Bacteria	Planctomycetes	Planctomycetacia	Pirellulales	Pirellulaceae	Pir4_lineage	667	0	0	1	0	1	0	3	0	1	0	1	1	3	6	1	12	24	0	0	0	1	1	2	1	0	9	3	5	9	45	21	27	60	0	0	2	1	1	1	2	41	8
Otu01549	Bacteria	Proteobacteria	Alphaproteobacteria	Caulobacterales	Caulobacteraceae	Caulobacter	358	29	43	16	0	1	7	1	1	7	4	13	2	3	0	1	3	1	18	10	1	1	0	0	0	0	0	0	0	2	0	7	0	1	25	9	0	1	0	0	0	1	0
Otu01550	Bacteria	Planctomycetes	Phycisphaerae	Tepidisphaerales	WD2101_soil_group	WD2101_soil_group_ge	487	47	43	12	13	29	11	0	0	17	1	4	0	1	0	2	0	0	14	14	11	1	1	3	2	0	0	1	1	0	0	3	0	0	39	4	4	1	0	0	0	0	0
Otu01551	Bacteria	Firmicutes	Clostridia	Clostridiales	Clostridiaceae_1	Clostridium_sensu_stricto_8	473	4	18	3	1	24	22	1	2	11	5	20	20	10	8	8	1	4	11	3	2	0	3	1	2	4	5	4	2	2	3	0	3	30	2	2	13	2	2	0	1	1	0
Otu01552	Bacteria	Proteobacteria	Alphaproteobacteria	Alphaproteobacteria_unclassified	Alphaproteobacteria_unclassified	Alphaproteobacteria_unclassified	77	0	0	1	1	0	4	2	4	2	2	5	4	2	2	2	1	0	0	0	2	2	1	0	0	0	0	1	0	2	3	0	1	0	0	0	1	0	0	2	1	0	6
Otu01553	Bacteria	Chloroflexi	Chloroflexia	Thermomicrobiales	JG30-KF-CM45	JG30-KF-CM45_ge	612	18	62	27	17	29	7	4	8	2	1	7	8	0	0	0	0	1	38	10	20	4	5	5	6	2	5	0	0	0	0	0	0	0	3	7	6	3	0	0	1	1	0
Otu01554	Bacteria	Chloroflexi	Chloroflexia	Thermomicrobiales	AKYG1722	AKYG1722_ge	615	3	11	18	13	2	3	9	11	24	10	15	28	15	9	15	10	12	6	4	0	3	5	8	5	3	9	2	16	3	10	3	5	9	1	2	2	3	2	1	12	4	3
Otu01555	Bacteria	Proteobacteria	Gammaproteobacteria	Gammaproteobacteria_unclassified	Gammaproteobacteria_unclassified	Gammaproteobacteria_unclassified	77	0	0	0	0	0	0	0	0	0	1	1	0	1	0	10	0	10	0	0	0	0	0	0	0	0	0	0	1	0	2	0	0	1	0	0	0	0	0	1	5	2	1
Otu01556	Bacteria	Acidobacteria	Subgroup_6	Subgroup_6_unclassified	Subgroup_6_unclassified	Subgroup_6_unclassified	849	1	1	4	7	1	1	14	73	39	22	12	14	13	3	1	0	11	0	1	0	2	24	22	9	4	1	29	7	0	2	0	0	1	0	6	0	21	42	4	1	1	0
Otu01557	Bacteria	Fibrobacteres	Fibrobacteria	Fibrobacterales	Fibrobacteraceae	uncultured	425	0	11	10	1	11	13	16	6	14	3	10	14	8	13	14	156	0	0	1	0	0	1	0	2	0	1	0	2	1	3	1	0	2	0	0	0	0	2	2	2	1	20
Otu01558	Bacteria	Planctomycetes	OM190	OM190_or	OM190_fa	OM190_ge	1640	0	0	0	0	0	0	7	0	5	6	8	19	31	101	168	169	8	0	0	0	1	0	0	1	5	21	3	107	18	59	15	0	4	0	1	0	1	3	12	25	3	11
Otu01559	Bacteria	Planctomycetes	Planctomycetacia	Pirellulales	Pirellulaceae	uncultured	270	0	3	1	1	0	2	3	1	13	7	9	3	9	4	2	0	1	0	7	2	3	5	13	6	4	8	3	1	0	0	0	0	1	0	2	2	6	4	4	1	0	1
Otu01560	Bacteria	Actinobacteria	Acidimicrobiia	Microtrichales	Ilumatobacteraceae	CL500-29_marine_group	441	68	18	8	1	1	2	3	1	4	0	9	0	0	0	0	0	1	30	12	3	1	3	1	4	1	0	0	0	1	1	0	0	1	28	2	0	0	0	0	0	0	0
Otu01561	Bacteria	Actinobacteria	Thermoleophilia	uncultured	uncultured_fa	uncultured_ge	317	1	6	4	2	1	2	4	8	8	7	6	2	2	5	6	0	3	1	6	2	5	3	0	2	0	15	0	1	0	7	1	4	10	1	13	1	0	3	0	2	3	1
Otu01562	Bacteria	Proteobacteria	Alphaproteobacteria	uncultured	uncultured_fa	uncultured_ge	621	0	7	9	5	7	11	9	34	44	46	5	1	8	13	19	4	0	0	4	4	0	4	4	5	4	5	4	23	10	20	5	0	0	0	3	5	3	1	2	4	2	2
Otu01563	Bacteria	Planctomycetes	Phycisphaerae	MSBL9	SG8-4	SG8-4_ge	428	0	0	0	0	0	0	3	0	2	0	1	3	2	5	0	13	25	0	0	0	0	0	1	1	2	2	2	2	2	17	7	35	22	0	1	0	1	2	1	8	19	8
Otu01564	Bacteria	Proteobacteria	Gammaproteobacteria	Oceanospirillales	Pseudohongiellaceae	Pseudohongiella	385	0	0	0	0	0	0	0	0	6	3	7	36	5	50	13	64	3	0	0	0	0	0	0	0	1	3	0	8	4	12	0	2	1	0	0	0	0	0	6	27	1	40
Otu01565	Bacteria	Actinobacteria	Acidimicrobiia	Microtrichales	uncultured	uncultured_ge	1066	21	86	104	19	16	7	18	7	10	18	7	5	2	7	0	6	2	18	15	8	5	15	2	6	1	102	0	0	2	2	0	0	1	11	22	41	21	0	0	2	0	0
Otu01566	Bacteria	Planctomycetes	Planctomycetacia	Pirellulales	Pirellulaceae	uncultured	77	0	1	0	0	0	0	0	0	3	3	1	2	1	3	4	2	1	0	0	1	2	0	0	1	0	2	1	3	0	1	0	0	3	0	0	0	0	0	2	3	2	9
Otu01567	Bacteria	Firmicutes	Clostridia	Clostridiales	Clostridiaceae_1	Clostridium_sensu_stricto_12	412	10	40	6	0	3	7	2	11	25	2	6	5	4	4	1	0	1	11	3	10	3	35	8	15	2	7	6	0	3	1	1	0	3	3	3	2	2	1	0	1	0	0
Otu01568	Bacteria	Planctomycetes	Planctomycetacia	Pirellulales	Pirellulaceae	uncultured	350	5	0	1	1	0	0	9	9	19	15	3	6	0	35	14	13	4	0	0	1	1	8	3	1	3	7	4	2	3	9	10	0	1	0	0	0	1	0	7	26	11	13
Otu01569	Bacteria	Chloroflexi	Chloroflexia	Thermomicrobiales	JG30-KF-CM45	JG30-KF-CM45_ge	416	3	5	9	6	1	1	4	8	31	19	10	7	0	7	10	3	8	2	11	2	1	5	8	4	5	1	1	7	3	5	0	3	15	2	5	1	6	1	1	1	1	1
Otu01570	Bacteria	Planctomycetes	Planctomycetacia	Pirellulales	Pirellulaceae	Pir4_lineage	180	0	1	1	0	0	0	0	2	4	9	5	2	2	2	5	1	0	0	0	1	1	2	1	1	2	1	4	1	1	1	0	0	2	1	1	1	0	1	1	5	6	31
Otu01571	Bacteria	Chloroflexi	Anaerolineae	Caldilineales	Caldilineaceae	uncultured	330	28	18	2	0	0	1	0	4	5	4	6	9	3	1	2	0	1	42	6	3	0	3	4	1	0	2	0	2	0	0	0	0	1	20	0	1	2	3	2	1	0	1
Otu01572	Archaea	Nanoarchaeaeota	Woesearchaeia	Woesearchaeia_or	Woesearchaeia_fa	Woesearchaeia_ge	1112	0	0	0	0	0	0	0	0	0	0	0	0	0	10	0	0	0	0	0	0	0	0	0	0	0	2	0	7	0	16	0	12	100	0	0	0	0	0	1	2	2	3
Otu01573	Bacteria	Bacteroidetes	Bacteroidia	Flavobacteriales	Flavobacteriaceae	Hoppeia	79	0	0	0	0	0	0	0	0	0	1	1	6	1	3	6	0	0	0	0	0	0	0	0	1	0	4	1	2	2	3	0	0	1	0	0	0	0	0	3	0	1	1
Otu01574	Bacteria	Chloroflexi	Anaerolineae	Ardenticatenales	uncultured	uncultured_ge	421	0	0	0	0	0	0	0	0	2	0	0	0	2	22	76	98	3	0	0	0	0	0	0	0	0	3	3	14	2	24	1	1	0	0	0	0	0	0	7	8	1	12
Otu01575	Bacteria	Proteobacteria	Alphaproteobacteria	Rhodobacterales	Rhodobacteraceae	Rhodobacteraceae_unclassified	614	0	0	0	0	0	0	0	3	4	4	17	48	8	16	37	23	11	1	0	0	0	0	0	0	3	12	2	13	9	35	2	0	0	0	1	1	0	1	20	34	22	30
Otu01576	Bacteria	Actinobacteria	Actinobacteria	Micrococcales	Promicromonosporaceae	Myceligenerans	676	0	1	8	24	9	16	10	6	5	9	41	113	19	19	13	1	6	0	0	23	0	2	3	1	5	70	0	0	0	4	0	1	1	0	6	1	6	2	3	1	1	0
Otu01577	Bacteria	Chloroflexi	JG30-KF-CM66	JG30-KF-CM66_or	JG30-KF-CM66_fa	JG30-KF-CM66_ge	393	0	19	14	14	5	7	11	18	14	5	3	1	4	2	8	2	1	3	10	0	2	5	7	3	4	3	0	14	1	4	2	0	0	2	8	0	7	2	0	0	0	1
Otu01578	Bacteria	Bacteroidetes	Bacteroidia	Cytophagales	Hymenobacteraceae	Pontibacter	544	0	17	86	89	1	16	0	0	23	3	0	1	0	2	31	33	2	11	20	0	1	6	6	10	0	0	1	0	1	4	1	1	0	3	8	2	4	2	0	0	0	0
Otu01579	Bacteria	Proteobacteria	Alphaproteobacteria	Rhizobiales	Rhizobiales_unclassified	Rhizobiales_unclassified	499	0	0	3	5	1	7	15	3	8	7	19	22	10	13	17	22	11	0	0	5	8	4	3	7	4	13	4	16	8	7	0	0	1	0	1	4	1	0	3	7	3	19
Otu01580	Bacteria	Bacteroidetes	Bacteroidia	Sphingobacteriales	KD3-93	KD3-93_ge	257	23	5	3	5	4	3	12	10	13	7	7	5	3	3	7	16	4	0	5	2	0	1	4	5	1	1	0	2	0	1	0	0	1	5	1	2	1	0	0	0	0	0
Otu01581	Bacteria	Verrucomicrobia	Verrucomicrobiae	Opitutales	Opitutaceae	Lacunisphaera	381	0	13	17	11	3	3	1	10	39	11	2	2	0	0	2	10	3	12	8	7	1	9	2	5	0	3	0	0	1	0	0	0	0	9	5	3	3	5	2	0	0	1
Otu01582	Bacteria	Entotheonellaeota	Entotheonellia	Entotheonellales	Entotheonellaceae	Entotheonellaceae_ge	706	0	0	6	4	0	1	42	37	77	88	10	7	14	11	10	0	4	0	0	0	0	29	24	9	2	2	9	7	1	0	1	0	1	0	1	1	15	18	1	3	0	0
Otu01583	Bacteria	Actinobacteria	Acidimicrobiia	Actinomarinales	uncultured	uncultured_ge	1200	0	0	0	0	0	0	0	0	2	1	0	0	0	6	3	41	79	0	0	0	0	0	0	0	0	0	0	2	1	26	12	95	41	0	0	0	0	0	8	22	152	12
Otu01584	Bacteria	Acidobacteria	Subgroup_21	Subgroup_21_or	Subgroup_21_fa	Subgroup_21_ge	504	0	0	0	0	0	0	4	0	2	2	1	3	3	0	1	3	4	0	0	0	3	3	0	1	0	2	0	11	0	26	0	58	85	1	1	0	0	0	11	3	2	14
Otu01585	Bacteria	Actinobacteria	Acidimicrobiia	Actinomarinales	uncultured	uncultured_ge	487	0	0	3	1	0	0	4	40	153	22	5	1	1	0	2	1	2	0	0	1	0	8	28	6	3	2	1	5	0	0	0	1	0	0	1	0	4	1	0	0	1	1
Otu01586	Bacteria	Nitrospirae	Thermodesulfovibrionia	uncultured	uncultured_fa	uncultured_ge	837	0	0	0	0	0	0	0	0	2	2	0	0	0	0	0	13	2	0	0	0	0	0	0	0	0	3	0	10	0	19	2	25	41	0	0	0	0	0	2	2	8	240
Otu01587	Bacteria	Nitrospirae	Thermodesulfovibrionia	uncultured	uncultured_fa	uncultured_ge	522	0	0	0	0	0	0	0	0	0	3	2	1	0	10	4	3	5	0	0	0	0	0	0	0	0	1	0	13	1	28	5	16	62	0	0	0	0	0	0	2	6	55
Otu01588	Bacteria	BRC1	BRC1_cl	BRC1_or	BRC1_fa	BRC1_ge	544	0	0	0	0	1	4	9	5	15	13	39	18	14	13	16	6	2	0	0	3	0	3	5	2	2	33	11	8	3	14	1	0	1	0	0	4	13	7	9	6	5	24
Otu01589	Bacteria	Bacteroidetes	Ignavibacteria	Ignavibacteriales	Ignavibacteriaceae	Ignavibacterium	499	0	0	0	0	7	3	1	15	26	17	11	14	1	0	0	4	1	0	1	20	6	8	3	3	3	14	1	1	1	2	0	4	1	0	2	3	2	6	4	4	22	1
Otu01590	Bacteria	Acidobacteria	Subgroup_22	Subgroup_22_or	Subgroup_22_fa	Subgroup_22_ge	428	0	0	0	0	0	0	0	0	1	8	3	3	1	2	8	10	6	0	0	0	0	0	0	0	0	2	1	3	3	6	2	7	5	0	0	0	1	1	4	5	3	8
Otu01591	Bacteria	Proteobacteria	Gammaproteobacteria	Gammaproteobacteria_Incertae_Sedis	Unknown_Family	uncultured	78	0	0	0	0	1	0	1	0	3	3	4	3	0	2	1	4	1	0	0	0	2	3	1	0	1	0	0	3	0	1	0	0	0	0	0	0	1	3	1	2	0	1
Otu01592	Bacteria	Proteobacteria	Alphaproteobacteria	Parvibaculales	Parvibaculaceae	Parvibaculum	848	0	0	1	0	1	7	7	3	8	16	10	11	3	35	4	16	34	0	0	3	2	0	0	0	1	4	2	3	3	15	5	131	78	0	1	0	0	0	10	19	29	5
Otu01593	Bacteria	Planctomycetes	Planctomycetacia	Isosphaerales	Isosphaeraceae	Isosphaeraceae_unclassified	92	17	3	3	0	0	1	0	0	5	0	0	0	0	0	0	0	0	11	2	0	0	0	0	2	0	0	0	0	0	0	0	0	0	8	0	1	0	0	0	0	0	0
Otu01594	Bacteria	Planctomycetes	OM190	OM190_or	OM190_fa	OM190_ge	939	0	1	8	2	1	1	2	3	9	2	1	0	3	13	21	18	62	0	4	0	2	1	2	1	0	0	0	4	1	41	4	131	86	0	2	0	2	3	4	4	141	7
Otu01595	Bacteria	Proteobacteria	Gammaproteobacteria	Betaproteobacteriales	Nitrosomonadaceae	MND1	76	0	0	0	0	0	0	0	0	2	0	6	6	1	5	0	21	1	0	0	0	0	0	1	0	0	2	0	2	0	3	0	1	1	0	0	0	0	0	0	1	1	0
Otu01596	Bacteria	Acidobacteria	Thermoanaerobaculia	Thermoanaerobaculales	Thermoanaerobaculaceae	Subgroup_10	95	0	0	0	1	0	1	0	1	4	2	4	4	2	3	5	4	3	0	0	1	1	0	2	0	1	2	0	3	2	2	2	0	0	0	1	0	1	0	1	1	1	0
Otu01597	Bacteria	Proteobacteria	Deltaproteobacteria	Myxococcales	BIrii41	BIrii41_ge	585	0	17	66	24	21	9	1	1	3	0	3	21	4	2	2	0	1	7	15	18	2	0	2	2	0	8	0	2	0	0	0	0	1	2	19	12	10	1	0	0	0	0
Otu01598	Bacteria	Proteobacteria	Gammaproteobacteria	Betaproteobacteriales	Nitrosomonadaceae	IS-44	599	0	0	0	0	0	0	0	0	0	0	0	0	1	3	0	1	2	0	0	0	1	0	0	0	0	2	0	17	0	23	0	7	32	0	1	0	0	0	5	8	1	152
Otu01599	Bacteria	Chloroflexi	Anaerolineae	Anaerolineales	Anaerolineaceae	uncultured	719	0	0	0	0	0	0	0	0	0	0	0	0	0	0	1	2	8	0	0	0	0	0	0	0	0	2	0	10	0	19	0	68	237	0	0	0	0	0	2	4	2	32
Otu01600	Bacteria	Planctomycetes	Phycisphaerae	Phycisphaerales	Phycisphaeraceae	uncultured	777	0	0	0	0	0	0	0	0	1	0	0	0	0	1	2	2	3	0	0	0	0	0	0	0	0	0	0	1	5	9	5	164	50	0	0	0	0	0	1	28	12	4
Otu01601	Bacteria	Proteobacteria	Gammaproteobacteria	Xanthomonadales	uncultured	uncultured_ge	814	0	0	7	1	11	9	8	9	6	10	23	5	9	11	45	16	3	0	0	4	0	2	0	1	9	3	0	7	1	144	1	0	0	0	3	1	5	8	6	28	4	5
Otu01602	Bacteria	Gemmatimonadetes	BD2-11_terrestrial_group	BD2-11_terrestrial_group_or	BD2-11_terrestrial_group_fa	BD2-11_terrestrial_group_ge	880	0	31	41	15	23	14	8	13	15	7	33	62	35	13	24	16	5	1	5	17	7	3	2	0	2	16	1	5	0	4	2	0	2	0	4	13	7	7	8	2	4	17
Otu01603	Bacteria	Gemmatimonadetes	S0134_terrestrial_group	S0134_terrestrial_group_or	S0134_terrestrial_group_fa	S0134_terrestrial_group_ge	828	0	6	6	4	4	4	27	43	30	12	11	56	34	1	0	0	3	0	5	4	10	11	18	11	9	21	19	6	0	0	2	0	1	1	3	37	6	33	1	1	0	0
Otu01604	Bacteria	Planctomycetes	Planctomycetacia	Pirellulales	Pirellulaceae	uncultured	308	2	8	8	9	2	1	1	4	5	3	5	10	3	0	0	1	3	9	12	5	0	6	2	6	9	9	3	0	1	0	0	0	0	8	10	2	2	2	0	0	0	0
Otu01605	Bacteria	Proteobacteria	Alphaproteobacteria	Alphaproteobacteria_unclassified	Alphaproteobacteria_unclassified	Alphaproteobacteria_unclassified	1187	3	87	92	2	72	28	18	31	15	7	22	6	2	2	4	14	3	18	26	38	5	7	11	6	8	1	0	3	0	3	0	7	3	6	21	18	5	0	0	2	1	0
Otu01606	Bacteria	Planctomycetes	Planctomycetes_unclassified	Planctomycetes_unclassified	Planctomycetes_unclassified	Planctomycetes_unclassified	582	0	0	2	0	0	0	31	21	29	39	22	7	24	19	24	7	2	0	0	0	4	17	16	2	10	6	6	16	9	5	1	0	0	0	0	1	2	3	4	2	3	0
Otu01607	Bacteria	Chloroflexi	Dehalococcoidia	SAR202_clade	SAR202_clade_fa	SAR202_clade_ge	752	0	0	0	0	0	0	0	0	26	18	41	57	14	14	46	44	1	0	0	0	0	0	0	2	6	28	0	13	3	6	1	0	1	0	0	0	0	2	14	15	5	33
Otu01608	Bacteria	Actinobacteria	Acidimicrobiia	IMCC26256	IMCC26256_fa	IMCC26256_ge	248	1	4	2	4	8	4	9	5	7	26	5	2	1	10	5	2	1	0	4	3	2	5	2	3	3	0	1	0	1	1	0	1	2	0	2	16	1	0	1	0	0	8
Otu01609	Bacteria	Actinobacteria	Acidimicrobiia	IMCC26256	IMCC26256_fa	IMCC26256_ge	757	0	0	5	3	0	2	29	13	21	34	47	56	21	32	7	0	11	0	1	4	2	15	19	5	12	27	16	16	12	8	3	1	0	0	3	1	6	9	3	5	1	1
Otu01610	Bacteria	Planctomycetes	Planctomycetacia	Planctomycetales	Gimesiaceae	Gimesia	623	0	0	2	0	1	2	8	7	16	3	21	19	1	16	21	8	47	0	0	3	0	0	0	1	1	6	0	5	2	12	7	42	22	0	0	0	1	1	8	13	10	1
Otu01611	Bacteria	Bacteroidetes	Bacteroidia	Chitinophagales	Chitinophagaceae	Chitinophagaceae_unclassified	354	12	1	0	0	0	0	0	0	7	1	4	0	2	0	2	0	0	12	17	4	3	0	1	4	0	0	0	0	0	0	25	0	9	0	3	0	2	0	0	2	0	2
Otu01612	Bacteria	Firmicutes	Bacilli	Bacillales	Paenibacillaceae	Cohnella	378	0	1	1	0	0	1	6	15	11	10	4	13	3	7	5	0	0	0	0	1	0	11	12	3	9	0	16	9	4	6	0	15	18	0	0	1	0	4	8	7	13	3
Otu01613	Bacteria	Proteobacteria	Alphaproteobacteria	Rhizobiales	uncultured	uncultured_ge	75	0	0	0	1	1	6	9	1	7	5	1	1	0	1	0	0	0	0	0	0	1	1	4	2	0	0	0	0	0	1	0	0	1	0	0	2	3	0	0	0	0	8
Otu01614	Bacteria	Bacteroidetes	Bacteroidia	Sphingobacteriales	env.OPS_17	env.OPS_17_ge	239	5	6	4	2	0	1	0	1	4	7	7	22	1	16	5	13	1	4	0	0	0	1	0	0	0	4	0	2	0	1	1	0	0	12	5	1	0	0	3	7	1	1
Otu01615	Bacteria	Bacteroidetes	Bacteroidia	Sphingobacteriales	Sphingobacteriaceae	Pedobacter	169	32	12	14	3	2	20	2	1	2	5	10	1	6	1	3	8	1	1	0	0	0	0	0	0	0	0	0	0	0	0	0	0	0	1	6	0	0	0	1	0	0	0
Otu01616	Bacteria	Proteobacteria	Gammaproteobacteria	Betaproteobacteriales	Burkholderiaceae	Burkholderiaceae_unclassified	978	79	43	34	22	10	26	1	1	9	4	12	1	2	0	1	1	5	37	22	14	2	0	1	2	0	0	0	0	0	1	1	2	49	83	21	5	0	1	0	2	1	13
Otu01617	Bacteria	Proteobacteria	Gammaproteobacteria	Betaproteobacteriales	Hydrogenophilaceae	Thiobacillus	85	0	0	0	0	0	0	0	0	1	0	0	3	1	1	0	0	11	0	0	0	0	0	0	0	0	6	0	0	1	0	0	3	2	0	1	0	0	0	1	0	1	0
Otu01618	Bacteria	Armatimonadetes	uncultured	uncultured_or	uncultured_fa	uncultured_ge	237	0	0	2	0	0	0	0	2	3	1	0	2	0	1	0	1	1	1	0	1	0	0	1	0	0	1	2	10	0	10	0	3	45	0	2	1	0	2	1	1	4	6
Otu01619	Bacteria	Actinobacteria	Acidimicrobiia	Actinomarinales	uncultured	uncultured_ge	1132	0	19	15	11	1	5	23	119	88	26	9	14	9	6	11	0	4	3	12	5	6	103	91	28	10	6	24	15	5	0	0	0	0	2	15	1	7	17	0	1	0	0
Otu01620	Bacteria	Bacteroidetes	Bacteroidia	Bacteroidales	Prolixibacteraceae	WCHB1-32	551	0	0	0	0	1	0	0	0	0	0	0	0	0	0	0	0	0	16	9	4	1	6	4	3	3	1	0	4	2	1	0	31	4	62	29	10	1	4	0	5	3	1
Otu01621	Bacteria	Verrucomicrobia	Verrucomicrobiae	Opitutales	Opitutaceae	Opitutus	280	1	2	0	0	1	0	2	1	5	7	6	1	7	29	12	14	0	0	2	0	1	1	0	0	2	3	1	30	11	14	0	4	1	4	0	0	1	0	5	7	0	1
Otu01622	Bacteria	Acidobacteria	Acidobacteriia	Acidobacteriales	uncultured	uncultured_ge	529	0	0	0	0	0	0	0	0	1	3	0	0	1	0	0	1	3	0	0	0	0	0	0	0	0	1	1	5	0	7	4	25	54	0	0	0	0	0	4	4	27	52
Otu01623	Bacteria	Nitrospirae	2001-04-29	4-29-1_or	4-29-1_fa	4-29-1_ge	706	0	0	0	0	0	0	0	0	0	0	0	0	0	10	22	34	14	0	0	0	0	0	0	0	0	0	2	15	7	36	13	14	72	0	0	0	0	0	1	6	29	0
Otu01624	Bacteria	Firmicutes	Bacilli	Bacillales	Bacillaceae	Anaerobacillus	385	0	0	4	2	3	39	12	18	15	1	16	13	2	2	2	0	1	0	3	10	7	9	11	3	0	0	1	1	2	5	0	1	2	13	1	17	12	2	0	1	1	1
Otu01625	Bacteria	Proteobacteria	Gammaproteobacteria	Steroidobacterales	Steroidobacteraceae	uncultured	987	79	141	32	7	3	9	2	1	6	0	12	2	1	0	2	1	0	23	21	2	2	5	0	3	0	2	0	0	0	1	3	1	5	200	20	2	3	0	0	0	0	0
Otu01626	Bacteria	Proteobacteria	Gammaproteobacteria	uncultured	uncultured_fa	uncultured_ge	884	0	0	0	0	0	0	0	0	0	2	4	7	2	65	48	54	3	0	0	0	0	0	0	0	2	26	5	97	25	28	3	1	3	0	0	0	0	0	36	49	5	55
Otu01627	Bacteria	Bacteroidetes	Rhodothermia	Rhodothermales	Rhodothermaceae	uncultured	877	0	0	0	0	0	0	4	5	10	25	26	23	31	64	61	43	7	0	0	0	0	0	0	0	1	5	6	47	10	54	10	1	1	0	0	0	0	2	23	38	6	22
Otu01628	Bacteria	Proteobacteria	Deltaproteobacteria	Desulfarculales	Desulfarculaceae	uncultured	691	0	0	0	0	0	4	7	2	5	60	91	54	20	2	4	10	4	0	0	2	3	0	3	0	6	70	3	7	0	5	0	0	1	0	2	10	2	14	2	4	0	7
Otu01629	Bacteria	Proteobacteria	Deltaproteobacteria	Myxococcales	Haliangiaceae	Haliangium	348	14	1	9	17	0	2	0	2	3	4	8	12	2	1	0	0	2	5	2	0	0	2	2	1	0	27	0	1	0	0	0	1	2	6	25	0	0	0	0	1	0	0
Otu01630	Bacteria	Verrucomicrobia	Verrucomicrobiae	Pedosphaerales	Pedosphaeraceae	Pedosphaeraceae_ge	229	2	13	10	14	8	1	0	6	7	4	12	14	2	1	0	0	1	1	3	2	3	3	4	0	1	3	0	0	0	0	0	0	0	1	3	5	1	1	0	2	0	0
Otu01631	Bacteria	Acidobacteria	Holophagae	Subgroup_7	Subgroup_7_fa	Subgroup_7_ge	131	0	0	0	0	0	0	0	0	0	3	0	1	0	10	9	4	0	0	0	0	0	0	0	0	0	0	0	6	3	8	7	0	1	0	0	0	0	0	1	2	17	6
Otu01632	Bacteria	Proteobacteria	Alphaproteobacteria	Rhizobiales	Methyloligellaceae	uncultured	86	0	0	0	0	1	1	0	0	5	9	0	3	6	1	1	1	1	0	0	0	0	1	0	0	0	0	1	7	0	4	0	1	1	0	0	0	0	1	3	0	2	3
Otu01633	Bacteria	Bacteroidetes	Rhodothermia	Rhodothermales	Rhodothermaceae	uncultured	575	1	3	3	3	16	10	81	8	50	28	6	0	5	13	6	1	2	0	1	6	6	3	6	2	6	0	3	18	1	11	3	0	0	0	0	0	0	1	1	0	0	0
Otu01634	Bacteria	Proteobacteria	Alphaproteobacteria	Rhizobiales	Rhizobiales_Incertae_Sedis	uncultured	451	0	0	0	0	0	0	0	0	4	2	1	1	2	5	5	7	2	0	0	0	0	0	0	0	2	1	4	32	0	31	1	12	72	0	0	0	0	0	5	4	7	18
Otu01635	Bacteria	Planctomycetes	Planctomycetacia	Planctomycetales	uncultured	uncultured_ge	1034	0	2	12	1	9	12	126	55	68	94	16	1	4	2	1	0	1	0	2	14	28	28	14	24	14	2	0	1	4	0	1	0	0	0	14	3	33	10	3	1	2	2
Otu01636	Bacteria	Firmicutes	Clostridia	Clostridiales	Peptococcaceae	Thermincola	215	1	0	1	0	1	0	1	3	6	3	5	2	2	4	5	1	1	3	1	1	2	1	1	1	0	7	7	1	4	20	1	2	4	6	3	3	2	2	3	10	4	0
Otu01637	Bacteria	Entotheonellaeota	Entotheonellia	Entotheonellales	Entotheonellaceae	Entotheonellaceae_ge	78	0	1	2	0	0	1	9	5	4	2	2	5	2	0	0	0	2	0	1	1	1	1	1	0	0	4	0	0	0	0	1	0	0	0	0	1	0	0	0	0	0	2
Otu01638	Bacteria	Proteobacteria	Gammaproteobacteria	Betaproteobacteriales	Methylophilaceae	Methylotenera	791	0	0	0	0	0	0	1	0	4	1	17	3	45	16	34	16	6	1	0	0	0	0	0	0	0	0	0	2	3	30	0	28	11	0	0	0	0	0	20	15	17	3
Otu01639	Bacteria	Acidobacteria	Blastocatellia_(Subgroup_4)	Blastocatellales	Blastocatellaceae	Blastocatella	690	27	53	92	28	28	30	9	13	20	3	10	35	0	1	1	1	1	10	12	14	5	0	7	5	0	2	0	1	0	0	1	0	0	7	9	5	2	5	0	0	0	1
Otu01640	Bacteria	Proteobacteria	Deltaproteobacteria	NB1-j	NB1-j_fa	NB1-j_ge	248	0	0	0	0	4	8	2	0	2	8	9	6	2	6	6	12	3	0	0	5	2	0	0	0	0	17	1	7	3	5	0	4	6	0	1	7	2	0	0	3	4	4
Otu01641	Bacteria	Firmicutes	Negativicutes	Selenomonadales	uncultured	uncultured_ge	652	0	0	1	0	1	2	4	4	13	8	9	88	34	18	25	3	10	0	0	1	0	0	4	1	4	48	27	5	1	5	3	2	27	0	0	0	1	1	13	5	6	0
Otu01642	Bacteria	Proteobacteria	Deltaproteobacteria	Deltaproteobacteria_unclassified	Deltaproteobacteria_unclassified	Deltaproteobacteria_unclassified	74	0	0	0	0	0	0	0	0	2	0	1	3	1	0	0	2	1	0	0	0	0	0	0	0	0	3	0	2	0	0	1	2	2	0	0	0	0	0	2	1	8	3
Otu01643	Bacteria	Proteobacteria	Alphaproteobacteria	Rhodobacterales	Rhodobacteraceae	Amaricoccus	787	1	3	5	4	1	1	23	54	58	53	24	11	13	19	21	1	4	0	1	0	0	25	22	18	7	4	8	11	4	7	2	0	0	2	5	0	13	22	3	6	0	19
Otu01644	Bacteria	Actinobacteria	Actinobacteria	Propionibacteriales	Propionibacteriaceae	Friedmanniella	365	75	6	2	0	0	13	0	0	7	0	14	3	2	0	4	1	4	14	4	0	0	0	1	4	0	0	0	0	0	0	2	0	0	11	1	1	1	0	1	0	0	0
Otu01645	Bacteria	Acidobacteria	Subgroup_21	Subgroup_21_or	Subgroup_21_fa	Subgroup_21_ge	244	0	0	2	3	2	1	4	5	5	10	15	3	4	4	10	13	2	0	2	3	2	1	1	1	2	4	2	5	2	12	4	0	1	0	0	3	6	4	0	3	0	0
Otu01646	Bacteria	Chloroflexi	Anaerolineae	Anaerolineales	Anaerolineaceae	Leptolinea	410	0	0	0	0	0	0	0	0	0	0	1	1	0	0	0	1	0	1	0	0	0	0	0	0	0	1	0	2	0	1	0	23	2	0	0	0	0	0	2	1	7	2
Otu01647	Bacteria	Actinobacteria	Nitriliruptoria	Nitriliruptorales	Nitriliruptoraceae	Nitriliruptoraceae_ge	460	0	3	4	1	1	3	13	15	9	7	30	14	29	18	16	4	6	0	1	2	2	12	6	4	10	23	4	12	5	7	3	1	0	0	0	1	2	3	8	1	2	1
Otu01648	Bacteria	Actinobacteria	Thermoleophilia	Gaiellales	Gaiellaceae	Gaiella	257	0	2	2	1	2	0	12	21	9	18	5	5	3	6	0	0	1	0	3	5	4	27	6	8	1	0	0	4	1	0	0	0	2	0	2	13	7	0	0	0	0	3
Otu01649	Bacteria	Proteobacteria	Deltaproteobacteria	Myxococcales	BIrii41	BIrii41_ge	315	0	1	8	0	17	7	3	1	12	7	2	6	2	12	2	54	0	0	1	5	3	1	1	0	3	3	0	4	1	12	1	1	9	0	0	0	1	0	7	12	1	5
Otu01650	Bacteria	Chloroflexi	Chloroflexia	Thermomicrobiales	AKYG1722	AKYG1722_ge	382	1	6	5	3	14	15	4	1	4	6	12	11	1	1	3	0	3	0	3	50	3	2	2	5	3	56	0	0	1	0	0	0	0	0	2	11	2	3	0	0	0	0
Otu01651	Bacteria	Chloroflexi	Chloroflexi_unclassified	Chloroflexi_unclassified	Chloroflexi_unclassified	Chloroflexi_unclassified	79	0	0	0	0	0	0	0	0	1	2	4	4	2	5	3	6	0	0	0	0	0	0	0	0	0	2	0	3	0	3	0	0	0	0	0	0	0	1	5	2	1	1
Otu01652	Bacteria	Chloroflexi	Anaerolineae	Anaerolineales	Anaerolineaceae	uncultured	1232	0	0	0	1	0	0	0	0	13	18	13	8	11	79	69	51	29	0	0	0	0	0	0	0	0	1	8	26	7	48	46	61	61	0	0	0	0	0	11	6	47	21
Otu01653	Bacteria	Actinobacteria	Acidimicrobiia	IMCC26256	IMCC26256_fa	IMCC26256_ge	499	0	0	0	1	0	0	8	9	22	20	8	63	33	21	15	0	5	0	1	1	3	2	6	1	3	23	13	19	3	5	0	0	0	0	4	2	2	8	2	2	1	1
Otu01654	Bacteria	Planctomycetes	Planctomycetacia	Pirellulales	Pirellulaceae	Pirellulaceae_unclassified	417	2	38	10	4	13	16	4	4	10	8	0	3	3	2	0	0	1	2	15	31	10	12	0	6	4	3	4	0	1	0	3	0	0	1	10	8	5	1	0	0	0	0
Otu01655	Bacteria	Proteobacteria	Gammaproteobacteria	Betaproteobacteriales	Burkholderiaceae	Burkholderiaceae_unclassified	383	15	12	5	3	2	13	7	1	18	1	3	4	8	0	5	13	3	2	0	2	0	0	0	0	0	0	0	0	0	0	64	0	0	3	0	0	0	0	0	1	0	0
Otu01656	Bacteria	Acidobacteria	Subgroup_5	Subgroup_5_or	Subgroup_5_fa	Subgroup_5_ge	321	0	2	1	2	0	1	4	11	20	19	2	2	2	14	3	6	3	0	2	2	3	1	13	3	1	0	5	3	5	5	3	1	9	0	7	4	3	3	2	0	2	1
Otu01657	Bacteria	Latescibacteria	Latescibacteria_cl	Latescibacteria_or	Latescibacteria_fa	Latescibacteria_ge	858	0	0	0	0	0	0	0	0	0	0	0	1	1	0	1	9	94	1	0	0	0	0	0	0	0	0	0	0	1	6	0	184	10	0	0	0	0	0	2	4	27	1
Otu01658	Bacteria	Dependentiae	Babeliae	Babeliales	Vermiphilaceae	Vermiphilaceae_ge	420	0	0	0	1	1	1	6	5	25	29	31	6	4	6	15	3	10	0	0	1	3	0	1	3	12	10	9	5	3	15	0	0	3	0	0	1	1	5	10	14	4	1
Otu01659	Bacteria	Verrucomicrobia	Verrucomicrobiae	Verrucomicrobiales	Rubritaleaceae	Luteolibacter	356	20	9	1	6	1	9	0	8	13	8	5	16	4	1	10	36	2	5	4	4	1	4	1	2	0	2	0	1	0	0	0	0	2	2	3	0	2	6	2	0	5	0
Otu01660	Bacteria	Planctomycetes	Phycisphaerae	Phycisphaerales	Phycisphaeraceae	uncultured	268	0	1	2	3	0	0	8	9	11	6	12	13	13	24	10	12	0	0	1	0	0	2	3	1	4	6	0	0	2	8	3	0	0	0	3	0	1	0	3	11	1	5
Otu01661	Bacteria	Proteobacteria	Gammaproteobacteria	Betaproteobacteriales	Nitrosomonadaceae	Ellin6067	825	0	0	0	0	0	0	0	0	0	0	0	0	0	1	0	1	24	1	0	0	0	0	0	0	1	1	0	2	0	6	0	625	36	0	0	0	0	1	6	12	12	2
Otu01662	Bacteria	Planctomycetes	Planctomycetacia	Gemmatales	Gemmataceae	Gemmata	618	25	36	23	10	65	33	0	2	5	1	4	2	1	0	1	0	2	22	19	44	2	2	3	3	0	1	0	0	0	0	0	0	0	8	7	18	0	0	0	0	0	0
Otu01663	Bacteria	Proteobacteria	Alphaproteobacteria	Rhizobiales	Rhizobiales_Incertae_Sedis	Bauldia	448	0	0	0	0	0	0	25	5	22	24	24	21	11	14	20	30	3	0	0	3	3	1	2	2	4	7	1	8	5	23	5	3	0	0	0	0	0	1	2	13	8	3
Otu01664	Bacteria	Chloroflexi	Anaerolineae	Anaerolineales	Anaerolineaceae	uncultured	765	0	1	6	1	0	0	15	65	113	40	5	1	6	2	5	1	3	1	4	3	0	64	35	22	2	0	12	14	2	1	0	1	1	0	4	2	3	13	1	2	2	0
Otu01665	Bacteria	Proteobacteria	Deltaproteobacteria	Myxococcales	Polyangiaceae	Aetherobacter	199	0	0	1	0	0	0	0	0	0	5	0	3	10	1	18	2	1	0	0	0	0	0	0	1	1	0	4	7	4	5	4	6	10	0	0	0	1	0	1	6	3	1
Otu01666	Bacteria	Planctomycetes	Phycisphaerae	Phycisphaerales	AKAU3564_sediment_group	AKAU3564_sediment_group_ge	358	0	0	0	0	1	1	10	4	8	28	24	21	7	5	8	7	1	0	0	0	0	0	0	0	4	24	0	5	3	9	3	1	0	0	0	1	3	0	3	6	4	6
Otu01667	Bacteria	Chloroflexi	Anaerolineae	Anaerolineales	Anaerolineaceae	uncultured	772	0	0	0	0	0	0	15	15	42	65	50	26	23	43	15	37	9	0	0	0	1	7	3	0	6	15	2	16	1	30	2	0	1	0	0	0	1	7	6	5	3	18
Otu01668	Bacteria	Proteobacteria	Deltaproteobacteria	Myxococcales	BIrii41	BIrii41_ge	727	28	40	19	2	1	2	0	0	10	9	19	2	0	1	1	0	1	109	43	17	3	24	3	6	0	0	0	0	0	0	2	1	2	38	3	0	4	0	0	2	0	0
Otu01669	Bacteria	Firmicutes	Clostridia	Clostridiales	Clostridiaceae_4	Clostridiaceae_4_unclassified	420	0	0	0	0	0	0	7	4	8	13	3	6	1	3	5	13	2	0	0	0	0	1	0	0	2	0	0	5	2	18	2	8	6	0	0	0	0	0	10	138	9	16
Otu01670	Bacteria	Actinobacteria	Acidimicrobiia	uncultured	uncultured_fa	uncultured_ge	517	5	5	6	9	1	4	2	33	92	53	1	1	1	2	3	0	1	2	13	2	0	20	14	11	10	0	1	5	1	1	0	0	0	7	2	1	1	0	0	1	7	2
Otu01671	Bacteria	Gemmatimonadetes	Gemmatimonadetes	Gemmatimonadales	Gemmatimonadaceae	uncultured	279	0	0	0	0	0	0	0	0	11	26	2	0	9	3	8	1	2	0	0	0	0	0	2	0	6	0	1	1	1	0	0	1	3	0	4	0	0	0	1	2	1	6
Otu01672	Bacteria	Chloroflexi	KD4-96	KD4-96_or	KD4-96_fa	KD4-96_ge	71	0	0	1	0	0	0	1	1	4	1	0	1	3	1	4	0	3	0	0	1	0	1	0	0	0	0	0	4	0	1	0	0	2	0	0	0	0	0	2	10	2	0
Otu01673	Bacteria	Chloroflexi	KD4-96	KD4-96_or	KD4-96_fa	KD4-96_ge	73	2	1	0	0	0	0	0	1	1	0	0	0	0	0	1	1	1	1	0	0	0	0	0	0	0	0	0	0	0	1	2	4	7	0	1	0	0	0	0	1	3	0
Otu01674	Bacteria	Planctomycetes	Planctomycetacia	Pirellulales	Pirellulaceae	uncultured	289	0	1	1	2	0	0	2	16	37	4	1	2	5	4	9	1	2	2	1	0	2	7	6	6	2	7	18	3	1	4	1	0	0	2	3	1	3	1	0	0	0	0
Otu01675	Bacteria	Chloroflexi	TK10	TK10_or	TK10_fa	TK10_ge	405	0	7	1	1	1	1	6	3	13	1	0	1	1	0	1	3	4	9	8	2	1	15	6	2	0	0	0	2	4	5	1	20	21	1	5	1	1	3	4	0	16	3
Otu01676	Bacteria	Proteobacteria	Deltaproteobacteria	NB1-j	NB1-j_fa	NB1-j_ge	963	0	0	0	0	0	0	0	0	7	8	16	116	20	72	28	85	3	0	0	0	0	0	0	0	3	10	0	27	6	59	0	4	1	0	0	0	0	0	26	41	37	7
Otu01677	Bacteria	Acidobacteria	Subgroup_22	Subgroup_22_or	Subgroup_22_fa	Subgroup_22_ge	374	0	1	1	5	1	2	5	5	11	9	5	1	4	12	15	43	20	0	1	2	0	0	1	2	3	1	2	12	7	13	6	3	8	0	2	1	2	1	1	3	12	2
Otu01678	Bacteria	Proteobacteria	Alphaproteobacteria	Rhizobiales	Rhizobiales_unclassified	Rhizobiales_unclassified	272	2	1	1	0	8	12	12	1	9	6	7	6	11	15	7	8	1	0	0	7	2	1	0	1	0	5	0	3	0	5	1	0	0	0	0	0	0	1	4	4	2	19
Otu01679	Bacteria	Actinobacteria	Thermoleophilia	Gaiellales	uncultured	uncultured_ge	847	0	7	28	24	0	3	53	65	67	28	15	0	7	0	2	0	4	0	10	4	7	37	35	12	8	0	0	0	1	0	0	0	1	0	6	14	17	1	1	2	0	0
Otu01680	Bacteria	Acidobacteria	Thermoanaerobaculia	Thermoanaerobaculales	Thermoanaerobaculaceae	Subgroup_10	1308	0	16	29	13	78	30	32	38	15	11	36	65	19	3	2	2	8	1	11	99	13	14	16	17	7	83	7	0	1	5	0	0	3	1	10	58	17	5	0	1	1	1
Otu01681	Bacteria	Proteobacteria	Gammaproteobacteria	HOC36	HOC36_fa	HOC36_ge	975	1	8	73	22	6	3	178	29	67	11	1	0	4	0	1	0	4	2	22	1	2	13	20	14	3	0	1	0	0	0	1	0	3	2	22	2	12	41	1	0	0	1
Otu01682	Bacteria	Chloroflexi	Anaerolineae	SBR1031	SBR1031_fa	SBR1031_ge	1133	0	0	0	0	0	0	0	0	0	1	0	1	0	0	0	0	4	0	0	0	0	0	0	0	0	3	0	22	0	58	0	54	72	0	0	0	0	0	4	5	4	114
Otu01683	Bacteria	Gemmatimonadetes	S0134_terrestrial_group	S0134_terrestrial_group_or	S0134_terrestrial_group_fa	S0134_terrestrial_group_ge	542	0	0	19	1	0	1	5	22	16	11	4	9	14	10	9	1	9	0	0	3	4	25	4	5	0	4	10	11	2	5	2	2	6	2	13	0	4	9	4	1	3	3
Otu01684	Archaea	Nanoarchaeaeota	Woesearchaeia	Woesearchaeia_or	Woesearchaeia_fa	Woesearchaeia_ge	370	0	0	0	0	0	1	3	1	4	6	1	2	0	18	5	5	10	0	0	0	0	0	0	0	0	6	2	16	6	15	7	41	22	0	0	0	0	0	7	8	2	5
Otu01685	Bacteria	Gemmatimonadetes	Gemmatimonadetes	Gemmatimonadales	Gemmatimonadaceae	Gemmatimonadaceae_unclassified	75	0	0	0	0	3	0	0	0	6	6	1	6	4	4	2	3	2	0	0	0	0	0	0	0	1	6	0	1	0	1	0	0	0	0	0	0	1	0	0	1	0	0
Otu01686	Bacteria	Actinobacteria	Acidimicrobiia	IMCC26256	IMCC26256_fa	IMCC26256_ge	1135	1	1	0	1	0	5	45	18	34	170	43	46	45	51	27	6	6	1	0	4	16	3	3	10	7	24	1	24	4	16	9	3	2	1	0	27	11	10	8	29	6	5
Otu01687	Bacteria	Planctomycetes	Planctomycetacia	Gemmatales	Gemmataceae	uncultured	247	4	13	4	4	0	1	2	15	5	7	1	0	1	1	1	1	0	2	6	1	0	10	4	5	1	1	2	1	0	0	1	0	0	7	6	0	1	0	0	1	1	1
Otu01688	Bacteria	Proteobacteria	Alphaproteobacteria	Tistrellales	Geminicoccaceae	uncultured	983	2	167	190	56	26	29	1	0	7	1	0	0	1	0	1	0	2	3	22	3	0	0	2	0	1	0	0	0	0	0	1	0	0	0	22	3	5	0	0	0	0	0
Otu01689	Bacteria	Acidobacteria	Subgroup_17	Subgroup_17_or	Subgroup_17_fa	Subgroup_17_ge	507	31	24	5	1	0	4	0	0	6	10	5	4	0	1	1	0	0	16	11	6	1	0	6	0	4	0	0	0	0	0	4	0	0	35	2	4	6	10	0	0	0	0
Otu01690	Bacteria	Chloroflexi	Anaerolineae	Ardenticatenales	uncultured	uncultured_ge	953	0	1	1	0	0	0	3	6	10	4	14	43	16	76	87	108	8	0	0	0	0	0	2	1	2	4	3	12	0	32	0	2	1	0	0	0	0	1	7	3	1	3
Otu01691	Bacteria	Proteobacteria	Alphaproteobacteria	Rhizobiales	Rhizobiales_unclassified	Rhizobiales_unclassified	668	0	0	0	0	0	0	5	7	14	15	2	4	5	2	9	4	3	0	0	0	2	0	3	2	1	2	2	9	2	27	0	25	75	0	0	0	1	2	4	9	14	92
Otu01692	Bacteria	Actinobacteria	Actinobacteria	Kineosporiales	Kineosporiaceae	Kineosporiaceae_unclassified	232	26	10	6	1	0	4	0	1	8	2	5	0	3	0	2	2	3	5	8	0	0	1	2	3	2	1	1	3	0	1	1	0	8	5	0	0	0	0	2	0	1	3
Otu01693	Bacteria	Verrucomicrobia	Verrucomicrobiae	Chthoniobacterales	Chthoniobacteraceae	Chthoniobacter	255	22	18	24	3	0	8	0	0	2	1	7	1	1	0	3	0	2	19	7	1	0	1	0	2	0	0	0	0	0	0	0	0	0	3	1	0	0	0	0	1	0	1
Otu01694	Bacteria	Actinobacteria	Actinobacteria	Propionibacteriales	Nocardioidaceae	Nocardioides	687	131	131	45	5	0	12	0	0	7	3	14	0	2	0	3	0	1	19	19	2	2	1	1	5	0	0	0	0	0	0	1	0	4	17	11	0	1	2	0	1	1	1
Otu01695	Bacteria	Acidobacteria	Thermoanaerobaculia	Thermoanaerobaculales	Thermoanaerobaculaceae	Subgroup_10	1017	9	46	56	67	2	6	16	39	20	20	13	11	1	2	0	0	3	7	34	2	7	15	5	6	3	8	6	0	0	0	0	0	1	21	24	4	6	17	1	0	5	1
Otu01696	Bacteria	Proteobacteria	Deltaproteobacteria	Syntrophobacterales	Syntrophaceae	uncultured	363	0	0	0	0	0	0	0	0	0	0	0	0	0	0	0	0	0	0	0	0	0	0	0	0	0	0	0	15	0	26	0	6	54	0	0	0	0	0	2	6	0	4
Otu01697	Bacteria	Firmicutes	Bacilli	Bacillales	Paenibacillaceae	Paenibacillus	196	0	0	1	0	0	1	8	10	13	8	4	5	8	5	4	1	1	0	0	0	0	5	2	1	1	1	7	5	1	0	0	0	3	0	0	0	0	1	0	2	2	1
Otu01698	Bacteria	Proteobacteria	Deltaproteobacteria	Bdellovibrionales	Bdellovibrionaceae	OM27_clade	179	3	4	0	0	3	7	3	3	7	10	3	5	3	3	4	1	2	2	3	0	1	3	3	1	2	2	5	0	0	1	1	0	0	4	4	2	1	0	0	0	1	0
Otu01699	Bacteria	Proteobacteria	Alphaproteobacteria	Rhodobacterales	Rhodobacteraceae	Rhodobacteraceae_unclassified	589	1	1	0	0	0	3	1	8	10	10	2	7	1	2	4	7	28	7	4	0	0	2	1	3	0	0	0	1	1	8	3	17	36	0	2	0	1	1	3	4	17	16
Otu01700	Bacteria	Proteobacteria	Alphaproteobacteria	Alphaproteobacteria_unclassified	Alphaproteobacteria_unclassified	Alphaproteobacteria_unclassified	867	13	49	52	18	37	21	28	6	34	7	6	2	10	2	1	0	2	9	27	27	12	15	14	14	2	3	0	1	0	0	0	0	1	9	1	25	4	5	1	2	0	0
Otu01701	Bacteria	Actinobacteria	Thermoleophilia	Solirubrobacterales	Solirubrobacteraceae	Conexibacter	364	64	39	15	2	0	2	0	2	9	3	10	1	0	1	0	0	1	15	11	0	2	2	2	5	0	1	1	0	0	0	0	0	0	13	4	1	1	0	0	0	1	0
Otu01702	Bacteria	Nitrospirae	Nitrospira	Nitrospirales	Nitrospiraceae	Nitrospira	70	0	3	1	2	8	6	1	0	1	1	1	3	1	0	0	0	1	0	2	4	0	0	0	1	0	1	0	0	0	1	0	0	0	0	2	0	0	0	1	0	0	0
Otu01703	Bacteria	GAL15	GAL15_cl	GAL15_or	GAL15_fa	GAL15_ge	370	0	0	0	1	0	0	6	8	10	12	2	21	10	14	13	1	4	1	0	4	1	6	2	3	8	6	36	6	5	2	0	1	14	0	3	0	6	8	3	0	0	1
Otu01704	Bacteria	Proteobacteria	Gammaproteobacteria	Coxiellales	Coxiellaceae	Coxiella	397	1	1	0	0	0	0	0	0	1	1	0	1	1	5	5	3	6	0	0	0	0	0	0	0	0	0	0	11	0	16	2	14	29	0	1	0	0	0	0	2	14	2
Otu01705	Bacteria	Planctomycetes	Phycisphaerae	CCM11a	CCM11a_fa	CCM11a_ge	413	0	0	0	0	1	0	0	2	7	11	6	20	5	28	8	32	15	0	0	1	0	0	0	0	0	4	0	10	5	15	3	2	6	0	0	0	1	3	14	20	8	10
Otu01706	Bacteria	Kiritimatiellaeota	Kiritimatiellae	Kiritimatiellales	Kiritimatiellaceae	MSBL3	227	0	0	0	1	0	0	0	0	5	2	12	15	16	11	7	2	6	2	1	1	0	0	0	0	1	1	0	14	2	14	0	0	2	4	0	1	1	1	4	13	9	6
Otu01707	Bacteria	Actinobacteria	Thermoleophilia	Gaiellales	uncultured	uncultured_ge	513	0	1	3	0	0	0	5	33	53	29	2	0	2	34	22	2	1	1	0	0	0	51	12	12	6	0	1	16	5	8	2	1	0	0	3	0	0	0	0	3	5	0
Otu01708	Bacteria	Verrucomicrobia	Verrucomicrobiae	Pedosphaerales	Pedosphaeraceae	Pedosphaeraceae_ge	606	20	28	20	10	41	12	11	13	28	18	15	12	2	6	6	2	2	13	10	15	0	4	2	5	2	6	0	7	1	1	0	0	1	11	3	9	3	2	1	0	0	1
Otu01709	Bacteria	Planctomycetes	Phycisphaerae	Tepidisphaerales	WD2101_soil_group	WD2101_soil_group_ge	673	0	1	1	1	98	10	7	1	3	6	13	62	9	0	0	2	7	0	1	37	1	0	1	0	1	33	22	0	0	0	0	0	0	0	1	31	1	25	0	0	1	0
Otu01710	Bacteria	Proteobacteria	Alphaproteobacteria	Rhizobiales	Beijerinckiaceae	Microvirga	806	166	44	12	0	0	11	0	0	20	2	23	0	2	0	8	0	3	57	19	3	3	0	4	10	0	0	0	0	0	0	1	0	2	73	5	0	0	0	0	1	1	1
Otu01711	Bacteria	Proteobacteria	Deltaproteobacteria	Myxococcales	Sandaracinaceae	Sandaracinus	244	1	7	7	3	7	5	4	8	6	0	2	2	0	0	0	1	10	3	8	8	1	4	1	4	0	1	0	0	0	0	0	0	7	2	4	3	2	0	0	0	0	1
Otu01712	Bacteria	Planctomycetes	Planctomycetacia	Pirellulales	Pirellulaceae	Pir4_lineage	517	21	39	38	0	59	26	2	1	4	2	6	8	2	1	0	1	2	26	0	21	2	3	4	4	0	0	0	0	0	0	2	0	0	5	10	3	0	0	1	1	0	0
Otu01713	Bacteria	Gemmatimonadetes	Gemmatimonadetes	Gemmatimonadales	Gemmatimonadaceae	uncultured	74	0	0	0	0	0	0	0	0	0	0	0	0	0	0	0	0	0	0	0	0	0	0	0	0	0	0	0	1	0	2	0	15	9	0	0	0	0	0	0	0	2	0
Otu01714	Bacteria	Proteobacteria	Deltaproteobacteria	Desulfuromonadales	Geobacteraceae	Geoalkalibacter	329	0	14	1	1	8	4	6	31	29	2	2	0	0	0	3	2	4	0	4	27	4	8	2	1	3	0	0	0	0	0	2	0	9	1	3	1	0	0	0	7	0	0
Otu01715	Bacteria	Proteobacteria	Deltaproteobacteria	Deltaproteobacteria_unclassified	Deltaproteobacteria_unclassified	Deltaproteobacteria_unclassified	1717	0	0	0	0	0	0	0	0	0	0	0	0	0	0	0	9	2	0	0	0	0	0	0	0	0	4	0	51	0	114	4	30	247	0	0	0	0	0	12	15	6	164
Otu01716	Bacteria	Gemmatimonadetes	Gemmatimonadetes	Gemmatimonadales	Gemmatimonadaceae	uncultured	518	0	1	0	3	2	1	9	1	15	19	14	9	8	18	41	33	4	0	2	7	0	2	4	2	8	17	6	22	5	13	3	0	0	0	3	2	0	5	9	1	2	1
Otu01717	Bacteria	WS2	WS2_cl	WS2_or	WS2_fa	WS2_ge	314	0	7	9	14	6	6	8	4	15	12	4	1	4	7	10	25	0	0	1	2	0	5	1	2	3	0	0	20	9	2	6	0	1	0	2	1	1	0	3	1	0	0
Otu01718	Bacteria	Chloroflexi	Anaerolineae	Anaerolineales	Anaerolineaceae	uncultured	716	0	0	0	0	0	0	0	1	263	158	7	2	17	25	7	6	7	0	0	0	0	0	8	7	6	1	8	43	10	8	2	0	0	0	0	0	0	0	5	0	1	1
Otu01719	Bacteria	Proteobacteria	Alphaproteobacteria	Rhizobiales	Rhizobiaceae	Hoeflea	770	0	0	0	0	2	0	12	0	13	2	4	32	0	6	28	42	10	0	0	0	0	0	0	0	2	0	0	1	2	4	0	2	17	0	0	1	2	4	6	15	43	2
Otu01720	Bacteria	Acidobacteria	Subgroup_6	Subgroup_6_or	Subgroup_6_fa	Subgroup_6_ge	72	0	0	3	0	1	1	2	4	9	5	1	1	1	2	6	1	0	0	1	0	0	2	0	0	2	0	0	2	1	4	0	0	0	0	1	0	0	0	0	0	0	0
Otu01721	Bacteria	Planctomycetes	Planctomycetacia	Planctomycetales	Planctomycetales_unclassified	Planctomycetales_unclassified	230	2	2	0	1	1	0	3	1	5	10	2	3	2	4	0	0	0	0	4	0	0	3	0	2	4	2	4	5	4	6	0	2	0	15	1	0	1	3	4	5	4	1
Otu01722	Bacteria	Bacteroidetes	Bacteroidia	Cytophagales	Cyclobacteriaceae	Algoriphagus	368	2	0	3	1	8	1	2	14	15	3	17	22	3	6	14	19	8	0	0	1	0	1	1	1	2	0	0	0	0	0	0	2	0	0	1	0	0	0	2	1	1	0
Otu01723	Bacteria	Proteobacteria	Gammaproteobacteria	Betaproteobacteriales	Betaproteobacteriales_unclassified	Betaproteobacteriales_unclassified	702	121	113	25	1	0	11	0	0	5	1	6	1	0	0	0	0	1	56	26	3	2	6	1	1	0	0	0	0	0	0	3	0	1	38	4	0	1	1	0	2	0	0
Otu01724	Bacteria	Proteobacteria	Gammaproteobacteria	Betaproteobacteriales	Hydrogenophilaceae	uncultured	860	0	1	0	0	0	0	0	11	28	0	3	0	2	0	0	3	7	0	0	8	11	18	6	6	2	3	0	15	3	1	0	0	7	0	2	0	1	3	4	3	0	0
Otu01725	Bacteria	Bacteria_unclassified	Bacteria_unclassified	Bacteria_unclassified	Bacteria_unclassified	Bacteria_unclassified	271	0	0	2	6	2	1	11	8	47	26	3	0	0	7	6	5	1	0	0	1	2	2	2	0	2	1	1	11	4	3	0	0	0	0	0	0	1	2	4	2	2	1
Otu01726	Bacteria	Chloroflexi	Anaerolineae	Anaerolineae_unclassified	Anaerolineae_unclassified	Anaerolineae_unclassified	246	0	0	0	0	0	0	0	0	1	0	0	0	2	2	3	1	0	0	0	0	0	0	0	0	0	0	0	2	0	1	0	0	5	0	0	0	0	0	0	22	1	130
Otu01727	Bacteria	Proteobacteria	Deltaproteobacteria	Myxococcales	Nannocystaceae	uncultured	1086	1	0	6	0	73	21	22	8	17	8	85	163	68	0	1	8	5	0	0	8	2	7	0	3	5	111	1	0	0	0	0	0	2	0	0	10	0	3	3	3	0	3
Otu01728	Bacteria	Actinobacteria	Thermoleophilia	Gaiellales	uncultured	uncultured_ge	354	0	2	2	2	0	0	17	32	43	22	1	3	6	3	2	1	2	0	0	0	2	20	8	6	5	0	5	7	0	3	0	0	0	0	1	1	9	3	1	0	5	5
Otu01729	Bacteria	Verrucomicrobia	Verrucomicrobiae	Pedosphaerales	Pedosphaeraceae	Pedosphaeraceae_ge	447	0	0	0	0	0	0	0	0	5	16	20	50	15	67	12	22	23	0	0	0	0	0	1	0	2	14	0	17	1	14	0	0	3	0	0	0	1	1	5	19	4	15
Otu01730	Bacteria	Chloroflexi	Dehalococcoidia	S085	S085_fa	S085_ge	95	0	0	0	0	0	0	1	1	0	3	0	2	0	2	9	0	4	0	0	0	0	0	1	0	0	0	0	9	1	2	1	1	0	0	0	0	0	3	1	2	0	1
Otu01731	Bacteria	Bacteroidetes	Ignavibacteria	Ignavibacteriales	Ignavibacteriaceae	Ignavibacterium	310	0	1	0	0	1	2	0	5	2	13	1	6	1	68	2	32	4	0	3	2	1	1	0	3	0	0	0	1	0	7	9	1	4	0	1	1	1	0	2	3	0	1
Otu01732	Bacteria	Planctomycetes	Pla4_lineage	Pla4_lineage_or	Pla4_lineage_fa	Pla4_lineage_ge	597	1	5	4	17	43	18	40	22	28	15	14	3	3	0	0	0	0	1	5	24	7	13	9	9	6	10	0	1	0	0	0	0	1	0	17	4	5	15	0	1	0	0
Otu01733	Bacteria	Chloroflexi	Dehalococcoidia	S085	S085_fa	S085_ge	79	0	0	0	0	1	0	0	1	5	4	5	1	3	7	5	0	1	0	0	1	0	0	0	1	1	0	0	1	0	0	0	0	2	0	0	0	0	0	3	0	3	3
Otu01734	Bacteria	Proteobacteria	Deltaproteobacteria	MBNT15	MBNT15_fa	MBNT15_ge	413	0	0	0	0	0	0	2	5	61	12	9	9	3	3	26	18	3	0	0	0	2	1	26	7	5	4	2	17	5	4	0	0	4	0	0	1	1	5	6	2	2	2
Otu01735	Bacteria	Actinobacteria	MB-A2-108	MB-A2-108_or	MB-A2-108_fa	MB-A2-108_ge	731	1	1	11	5	11	15	72	19	33	42	20	5	11	20	9	1	7	0	7	6	12	16	6	5	11	1	5	16	2	3	2	0	3	0	6	1	8	11	1	1	9	1
Otu01736	Bacteria	Chloroflexi	Anaerolineae	Anaerolineales	Anaerolineaceae	Anaerolineaceae_unclassified	564	0	0	0	0	0	0	0	3	5	2	3	23	9	2	2	0	13	0	0	0	0	3	1	0	0	1	4	5	0	8	0	53	76	0	0	0	0	0	5	4	6	3
Otu01737	Bacteria	Bacteroidetes	Bacteroidia	Bacteroidales	Bacteroidetes_BD2-2	Bacteroidetes_BD2-2_ge	996	0	0	0	0	0	0	0	0	0	0	0	0	0	0	0	1	14	0	0	0	0	0	0	0	0	0	0	0	0	1	0	242	16	0	0	0	0	0	1	6	21	1
Otu01738	Bacteria	Proteobacteria	Deltaproteobacteria	Myxococcales	Sandaracinaceae	Sandaracinus	475	0	3	3	0	7	9	5	6	12	11	27	37	13	11	17	17	4	2	1	2	1	0	2	0	3	23	0	11	4	20	2	2	1	0	1	2	0	1	4	7	1	5
Otu01739	Bacteria	Bacteroidetes	Bacteroidia	Chitinophagales	Chitinophagaceae	uncultured	719	117	95	59	17	10	8	0	0	11	1	27	2	2	0	2	8	1	35	13	4	2	1	0	2	0	0	0	0	0	0	1	0	1	44	5	0	1	0	0	0	1	0
Otu01740	Bacteria	Proteobacteria	Gammaproteobacteria	Gammaproteobacteria_unclassified	Gammaproteobacteria_unclassified	Gammaproteobacteria_unclassified	847	0	0	0	0	0	0	0	0	1	3	2	1	6	31	41	43	19	0	0	0	0	0	0	0	1	1	9	65	28	75	13	11	1	0	0	0	0	0	18	24	26	4
Otu01741	Bacteria	Proteobacteria	Gammaproteobacteria	Gammaproteobacteria_Incertae_Sedis	Unknown_Family	uncultured	69	0	0	0	0	0	0	0	0	0	4	4	3	4	1	5	0	3	0	0	0	0	0	0	0	1	1	0	1	0	0	2	0	0	0	0	0	0	0	3	1	0	3
Otu01742	Bacteria	Actinobacteria	Thermoleophilia	Solirubrobacterales	67-14	67-14_ge	212	10	7	2	1	2	1	5	0	6	1	0	1	0	1	0	0	0	8	5	0	0	6	2	1	0	0	1	0	0	0	0	0	0	10	5	0	1	0	0	0	0	0
Otu01743	Bacteria	Verrucomicrobia	Verrucomicrobiae	Pedosphaerales	Pedosphaeraceae	Pedosphaeraceae_ge	409	0	0	0	0	0	0	0	0	0	4	2	17	8	6	34	29	2	0	0	0	0	0	0	0	1	1	3	65	1	5	0	1	2	0	0	0	0	5	11	3	2	6
Otu01744	Bacteria	Acidobacteria	Acidobacteriia	Solibacterales	Solibacteraceae_(Subgroup_3)	Candidatus_Solibacter	724	25	80	48	21	21	4	0	3	7	0	1	0	1	1	0	0	0	44	19	11	0	4	2	2	2	0	3	0	0	0	2	0	2	22	26	2	0	0	1	0	0	0
Otu01745	Bacteria	Planctomycetes	Phycisphaerae	S-70	S-70_fa	S-70_ge	736	0	0	1	0	2	2	2	6	33	38	27	68	24	92	5	33	5	0	0	1	0	2	0	2	4	8	0	20	9	15	2	0	0	0	0	0	2	1	28	36	3	16
Otu01746	Bacteria	Actinobacteria	Actinobacteria	Micromonosporales	Micromonosporaceae	Dactylosporangium	584	106	8	0	0	0	11	0	0	6	3	31	0	0	0	1	2	0	52	10	3	2	0	0	43	0	0	0	0	0	1	10	0	0	45	9	0	0	0	0	1	1	0
Otu01747	Bacteria	Bacteroidetes	Bacteroidia	Flavobacteriales	Flavobacteriaceae	Flavobacteriaceae_unclassified	78	0	6	4	0	0	3	1	1	0	2	1	0	3	4	6	0	2	0	0	1	0	0	0	1	0	0	0	0	0	1	0	0	4	0	0	1	0	0	1	0	0	0
Otu01748	Bacteria	Acidobacteria	Acidobacteriia	Solibacterales	Solibacteraceae_(Subgroup_3)	GOUTB8	559	0	0	0	0	0	0	0	0	1	0	0	0	0	0	0	0	2	0	0	0	0	0	0	0	0	0	5	4	2	10	3	14	118	0	0	0	0	0	4	1	13	27
Otu01749	Bacteria	Omnitrophicaeota	Omnitrophicaeota_cl	Omnitrophicaeota_or	Omnitrophicaeota_fa	Omnitrophicaeota_ge	396	0	0	0	0	0	0	3	15	28	16	34	8	8	20	5	4	2	0	0	0	0	1	7	1	2	5	1	19	1	6	1	1	0	0	1	1	1	1	4	3	1	1
Otu01750	Bacteria	Chloroflexi	KD4-96	KD4-96_or	KD4-96_fa	KD4-96_ge	114	0	0	0	0	0	0	2	0	0	11	0	3	3	0	0	0	3	0	0	0	0	0	1	0	0	1	5	9	1	0	0	0	0	0	0	0	1	7	2	1	0	0
Otu01751	Bacteria	Chloroflexi	Anaerolineae	SBR1031	SBR1031_fa	SBR1031_ge	325	0	1	1	2	0	0	12	5	2	2	4	43	5	1	10	1	3	0	1	0	3	2	3	2	0	24	4	3	0	2	0	2	5	0	2	2	11	0	0	2	5	2
Otu01752	Bacteria	Bacteroidetes	Bacteroidia	Flavobacteriales	Cryomorphaceae	uncultured	653	0	0	0	0	0	0	7	0	8	19	34	10	21	8	41	17	12	0	0	0	0	0	0	0	2	2	2	26	6	30	1	2	24	0	0	0	0	0	1	45	2	0
Otu01753	Bacteria	Bacteroidetes	Bacteroidia	Flavobacteriales	Flavobacteriaceae	Hoppeia	172	0	0	0	0	0	0	0	0	3	0	2	8	105	1	2	3	1	0	0	0	0	0	0	0	0	3	0	4	0	1	0	0	0	0	0	0	0	1	0	2	2	0
Otu01754	Bacteria	Acidobacteria	Subgroup_5	Subgroup_5_or	Subgroup_5_fa	Subgroup_5_ge	512	0	0	0	0	1	4	22	12	42	30	14	2	8	27	22	36	3	0	0	0	1	0	4	4	7	5	4	25	3	27	11	0	0	0	0	1	5	1	3	5	0	11
Otu01755	Bacteria	Proteobacteria	Deltaproteobacteria	MBNT15	MBNT15_fa	MBNT15_ge	738	0	0	0	0	0	1	8	26	55	72	34	7	24	42	23	13	4	0	0	0	3	21	4	8	12	0	9	30	4	15	3	0	4	0	0	0	9	11	7	1	6	0
Otu01756	Bacteria	Proteobacteria	Alphaproteobacteria	Rhizobiales	uncultured	uncultured_ge	434	31	9	6	0	0	3	2	4	22	7	8	18	3	3	9	15	2	9	6	2	1	2	5	1	0	29	1	1	2	9	2	1	1	16	1	2	0	0	2	3	0	9
Otu01757	Bacteria	Acidobacteria	Subgroup_17	Subgroup_17_or	Subgroup_17_fa	Subgroup_17_ge	687	5	3	12	10	5	7	32	36	17	12	20	10	4	0	1	1	2	0	5	9	5	14	9	11	4	3	4	1	0	0	1	1	1	13	16	5	14	6	3	0	2	20
Otu01758	Archaea	Nanoarchaeaeota	Woesearchaeia	Woesearchaeia_or	Woesearchaeia_fa	Woesearchaeia_ge	676	0	0	0	0	0	0	0	0	0	2	0	0	0	0	0	0	0	0	0	0	0	0	0	0	0	2	0	13	0	27	0	20	255	0	0	0	0	0	1	1	1	6
Otu01759	Bacteria	Planctomycetes	Phycisphaerae	Tepidisphaerales	WD2101_soil_group	WD2101_soil_group_ge	447	14	49	22	11	9	8	6	10	8	4	3	0	0	0	0	0	0	12	11	8	2	3	1	6	1	1	0	2	0	0	1	0	2	15	13	7	10	1	0	0	0	0
Otu01760	Bacteria	Planctomycetes	Phycisphaerae	CCM11a	CCM11a_fa	CCM11a_ge	1088	0	0	0	0	0	0	0	0	31	92	86	62	32	96	39	16	2	0	0	0	0	0	2	0	14	61	13	80	3	17	2	1	1	0	0	0	0	9	2	24	4	9
Otu01761	Bacteria	Planctomycetes	Planctomycetacia	Pirellulales	Pirellulaceae	Rhodopirellula	301	36	32	32	4	1	7	0	0	2	1	10	0	3	0	1	0	0	23	14	4	1	3	2	3	0	0	0	0	0	0	3	0	3	9	7	0	0	1	0	0	1	0
Otu01762	Bacteria	Planctomycetes	Planctomycetacia	Pirellulales	Pirellulaceae	Pirellula	274	12	10	10	10	2	1	8	6	17	6	1	1	0	1	1	0	1	3	12	2	1	9	5	2	0	0	0	0	0	2	0	0	0	22	2	1	3	0	0	0	0	0
Otu01763	Bacteria	Acidobacteria	Subgroup_6	Subgroup_6_unclassified	Subgroup_6_unclassified	Subgroup_6_unclassified	69	2	5	9	5	0	0	0	0	3	0	2	1	1	0	1	0	0	1	0	1	0	1	1	1	0	0	0	0	0	0	0	0	0	0	2	2	1	0	0	0	0	0
Otu01764	Bacteria	Bacteroidetes	Bacteroidia	Chitinophagales	Chitinophagales_unclassified	Chitinophagales_unclassified	217	2	15	11	6	12	8	11	0	6	0	0	0	0	0	1	0	0	3	13	3	0	1	4	1	0	0	0	0	0	0	0	0	0	9	4	0	2	0	0	0	0	0
Otu01765	Bacteria	Proteobacteria	Deltaproteobacteria	Syntrophobacterales	Syntrophaceae	Desulfobacca	356	0	0	0	0	0	0	0	0	0	2	0	1	2	5	19	3	0	0	0	0	0	0	0	0	0	1	2	6	0	10	3	10	59	0	0	0	0	0	2	1	2	11
Otu01766	Bacteria	Actinobacteria	Actinobacteria	Propionibacteriales	Propionibacteriaceae	uncultured	1220	298	22	8	2	0	21	0	0	36	3	35	0	9	0	8	2	11	87	33	4	0	5	2	9	0	0	1	0	2	0	10	0	1	56	7	0	1	0	0	1	2	3
Otu01767	Bacteria	Acidobacteria	Blastocatellia_(Subgroup_4)	Blastocatellales	Blastocatellaceae	Blastocatellaceae_unclassified	562	83	79	35	7	5	4	2	1	14	4	9	0	1	0	5	0	1	15	16	6	0	1	0	1	1	2	0	0	0	0	4	0	0	60	10	2	2	0	0	0	1	0
Otu01768	Bacteria	Planctomycetes	Planctomycetacia	Planctomycetales	uncultured	uncultured_ge	375	0	0	0	3	4	10	23	8	17	12	14	23	4	18	13	8	3	0	0	2	3	5	2	1	2	4	0	7	4	9	5	1	0	0	0	0	1	4	2	3	0	30
Otu01769	Bacteria	Actinobacteria	Acidimicrobiia	Actinomarinales	uncultured	uncultured_ge	1144	0	0	0	2	2	3	35	31	29	87	85	58	24	47	49	64	4	0	0	1	1	13	4	6	34	16	12	23	24	32	7	0	1	0	0	3	17	10	10	16	4	32
Otu01770	Bacteria	Planctomycetes	Planctomycetacia	Planctomycetales	Rubinisphaeraceae	SH-PL14	206	4	8	4	3	1	0	1	4	12	9	2	1	1	2	0	0	3	6	5	0	0	1	3	2	4	2	4	2	1	1	1	0	0	4	7	1	5	1	1	0	0	0
Otu01771	Bacteria	Chloroflexi	Dehalococcoidia	S085	S085_fa	S085_ge	218	0	2	1	1	1	0	0	4	8	11	0	0	0	6	15	4	2	0	1	0	0	0	7	2	5	0	1	15	5	17	3	0	1	0	0	0	1	1	2	1	2	5
Otu01772	Bacteria	Chloroflexi	Dehalococcoidia	S085	S085_fa	S085_ge	222	0	3	6	9	3	2	5	3	19	9	4	3	1	2	2	3	0	0	1	5	2	5	1	2	1	3	0	5	0	1	0	0	0	0	3	2	6	1	1	0	4	13
Otu01773	Bacteria	Proteobacteria	Alphaproteobacteria	Alphaproteobacteria_unclassified	Alphaproteobacteria_unclassified	Alphaproteobacteria_unclassified	85	0	0	0	0	0	0	0	2	8	0	0	2	3	8	2	6	0	0	0	0	0	0	0	2	0	0	0	0	3	2	0	1	0	0	0	0	0	0	1	8	2	6
Otu01774	Bacteria	Acidobacteria	Subgroup_15	Subgroup_15_or	Subgroup_15_fa	Subgroup_15_ge	196	0	0	0	0	0	0	0	3	9	5	0	1	4	4	10	19	3	0	1	0	0	0	6	0	0	0	8	8	2	10	6	1	0	0	0	0	0	0	1	2	3	4
Otu01775	Bacteria	BRC1	BRC1_cl	BRC1_or	BRC1_fa	BRC1_ge	223	0	9	9	4	2	2	4	3	8	8	4	4	9	6	2	4	5	0	1	5	3	0	2	1	1	2	1	3	0	4	2	0	0	0	2	1	0	0	1	11	2	3
Otu01776	Bacteria	Bacteroidetes	Bacteroidia	Sphingobacteriales	NS11-12_marine_group	NS11-12_marine_group_ge	626	0	0	0	0	3	1	3	2	4	13	54	55	34	22	16	9	12	0	0	0	1	0	0	0	8	18	2	7	3	7	2	4	22	0	0	0	1	1	7	19	1	20
Otu01777	Bacteria	Acidobacteria	Subgroup_6	Subgroup_6_unclassified	Subgroup_6_unclassified	Subgroup_6_unclassified	72	0	0	0	0	0	0	1	2	6	6	0	0	0	3	1	2	2	0	0	0	0	3	0	0	0	0	0	2	0	0	1	0	0	0	2	1	2	0	0	0	2	0
Otu01778	Bacteria	Actinobacteria	Acidimicrobiia	IMCC26256	IMCC26256_fa	IMCC26256_ge	421	0	5	8	2	4	2	16	5	10	13	14	15	17	6	4	1	4	1	3	8	1	5	5	2	3	25	5	8	1	2	0	4	10	0	3	4	0	9	2	3	0	1
Otu01779	Bacteria	Actinobacteria	Acidimicrobiia	IMCC26256	IMCC26256_fa	IMCC26256_ge	738	0	0	1	0	0	0	6	4	3	25	9	12	13	34	64	43	4	0	0	1	3	0	1	1	3	28	1	23	10	34	7	0	2	0	1	4	5	4	36	53	10	46
Otu01780	Bacteria	Chloroflexi	Dehalococcoidia	Dehalococcoidales	Dehalococcoidaceae	Dehalogenimonas	733	0	0	0	0	0	0	0	1	9	0	2	3	1	18	0	14	31	0	1	0	1	0	0	3	0	2	0	10	1	15	0	60	76	0	1	1	1	0	5	6	44	17
Otu01781	Bacteria	Proteobacteria	Gammaproteobacteria	Cellvibrionales	Cellvibrionaceae	Cellvibrio	879	0	0	0	0	0	0	7	7	41	25	10	4	13	37	34	8	4	0	0	0	0	1	5	0	5	3	0	24	17	34	0	1	3	0	0	1	4	10	34	11	2	3
Otu01782	Bacteria	Chloroflexi	Anaerolineae	Anaerolineales	Anaerolineaceae	uncultured	218	0	1	0	0	0	0	2	1	4	3	0	6	2	6	9	0	4	0	0	1	2	4	4	3	0	0	5	4	2	12	3	7	8	0	0	1	1	0	2	12	11	2
Otu01783	Bacteria	Proteobacteria	Gammaproteobacteria	Betaproteobacteriales	TRA3-20	TRA3-20_ge	438	60	7	0	2	1	3	0	2	2	2	3	0	0	1	1	1	0	55	16	1	0	2	0	0	0	0	0	0	0	0	0	1	1	63	0	0	0	0	0	0	0	0
Otu01784	Bacteria	Planctomycetes	Planctomycetacia	Pirellulales	Pirellulaceae	Pir4_lineage	969	0	0	0	0	0	1	17	13	23	28	26	25	31	48	65	33	6	0	0	0	0	3	2	3	13	11	9	44	14	67	39	4	3	0	0	0	1	3	32	79	12	37
Otu01785	Bacteria	Chloroflexi	TK10	TK10_or	TK10_fa	TK10_ge	359	26	33	21	9	5	8	1	1	0	1	7	4	0	0	0	0	2	22	9	3	2	1	1	1	0	0	0	1	0	0	0	0	0	10	9	1	0	0	1	0	1	0
Otu01786	Bacteria	Planctomycetes	Planctomycetacia	Pirellulales	Pirellulaceae	Pirellula	158	0	0	5	1	3	1	1	3	3	0	0	2	0	1	1	1	0	0	2	0	0	16	1	3	0	4	0	2	0	1	0	0	4	0	2	3	7	3	0	1	1	0
Otu01787	Bacteria	Planctomycetes	Planctomycetacia	Pirellulales	Pirellulaceae	Pir4_lineage	297	0	0	0	0	0	0	12	7	6	4	2	4	0	38	10	31	1	0	0	1	0	2	0	0	1	1	1	4	2	4	1	0	0	0	0	0	1	1	3	14	1	87
Otu01788	Bacteria	Planctomycetes	Planctomycetes_unclassified	Planctomycetes_unclassified	Planctomycetes_unclassified	Planctomycetes_unclassified	1118	0	0	0	0	0	0	0	0	1	0	0	0	2	25	141	297	18	0	0	0	0	0	0	0	0	0	16	47	25	105	43	0	2	0	0	0	0	0	10	11	1	1
Otu01789	Bacteria	Bacteroidetes	Ignavibacteria	Ignavibacteriales	Ignavibacteriales_unclassified	Ignavibacteriales_unclassified	610	0	0	0	0	0	0	0	0	0	3	1	1	1	3	3	7	0	0	0	0	0	0	0	0	0	0	0	5	0	16	0	40	204	0	0	0	0	1	3	3	3	37
Otu01790	Bacteria	Verrucomicrobia	Verrucomicrobiae	Pedosphaerales	Pedosphaeraceae	Pedosphaeraceae_ge	360	0	0	2	0	0	1	1	2	7	1	10	28	7	18	10	31	1	0	0	1	1	3	1	1	0	6	0	3	1	11	0	0	1	0	0	0	1	0	7	13	0	4
Otu01791	Bacteria	Planctomycetes	Planctomycetacia	Pirellulales	Pirellulaceae	Pir4_lineage	78	0	0	0	0	0	0	0	0	7	1	2	3	3	4	0	0	2	0	0	1	0	2	0	1	0	2	4	2	0	0	1	1	1	0	0	0	2	0	1	2	0	0
Otu01792	Bacteria	Bacteria_unclassified	Bacteria_unclassified	Bacteria_unclassified	Bacteria_unclassified	Bacteria_unclassified	68	0	0	0	0	0	0	0	0	0	0	0	1	0	13	0	4	0	0	0	0	0	0	0	0	0	0	0	1	0	4	0	0	0	0	0	0	0	0	2	13	0	21
Otu01793	Bacteria	Bacteria_unclassified	Bacteria_unclassified	Bacteria_unclassified	Bacteria_unclassified	Bacteria_unclassified	327	0	1	8	4	3	2	10	6	15	8	4	13	6	5	6	13	3	0	1	2	2	1	1	1	0	4	2	18	2	11	0	1	1	0	3	2	0	0	2	2	2	0
Otu01794	Bacteria	Chloroflexi	Anaerolineae	Anaerolineales	Anaerolineaceae	UTCFX1	68	4	3	0	0	0	1	0	1	1	3	4	1	1	0	0	0	0	1	1	2	0	1	0	0	0	2	0	0	0	0	0	0	0	3	2	1	0	0	0	0	0	0
Otu01795	Bacteria	Chloroflexi	Anaerolineae	Anaerolineales	Anaerolineaceae	uncultured	477	67	39	19	8	0	5	0	2	7	2	11	1	1	2	2	5	1	21	17	7	0	3	0	0	0	2	0	0	1	1	0	0	0	18	11	4	1	1	0	1	3	1
Otu01796	Bacteria	Planctomycetes	Planctomycetacia	Gemmatales	Gemmataceae	uncultured	375	0	5	3	2	27	30	4	4	12	2	1	0	0	0	0	0	0	0	4	55	4	2	7	7	1	0	0	0	0	0	2	0	0	1	3	18	2	1	0	0	0	0
Otu01797	Bacteria	Proteobacteria	Gammaproteobacteria	Oceanospirillales	Pseudohongiellaceae	BIyi10	1037	124	84	93	18	20	23	2	5	11	3	19	20	8	0	2	3	4	35	36	13	1	6	2	4	0	1	0	1	0	0	1	4	24	53	17	3	1	0	4	0	0	0
Otu01798	Bacteria	Proteobacteria	Deltaproteobacteria	Desulfobacterales	Desulfobulbaceae	Desulfobulbaceae_unclassified	78	0	0	0	0	0	0	0	0	3	0	2	0	1	2	4	4	0	0	0	0	0	1	0	0	0	1	0	7	1	12	0	1	0	0	0	0	0	1	3	2	0	1
Otu01799	Bacteria	PAUC34f	PAUC34f_cl	PAUC34f_or	PAUC34f_fa	PAUC34f_ge	467	0	0	0	0	1	1	5	9	27	22	7	2	4	17	28	21	7	0	0	0	0	1	3	2	9	0	14	14	15	17	22	4	0	0	0	0	2	2	2	10	6	5
Otu01800	Bacteria	Chloroflexi	Chloroflexi_unclassified	Chloroflexi_unclassified	Chloroflexi_unclassified	Chloroflexi_unclassified	957	0	0	0	0	0	0	0	0	0	0	0	2	2	0	4	18	107	0	0	0	0	0	0	0	0	1	0	2	0	21	4	12	26	0	0	0	0	0	6	9	146	4
Otu01801	Bacteria	Proteobacteria	Deltaproteobacteria	Desulfobacterales	Desulfobulbaceae	uncultured	85	0	0	0	0	0	0	0	0	0	0	1	0	0	0	1	5	3	0	0	0	0	0	0	0	0	0	0	1	1	3	0	2	0	0	0	0	0	0	16	24	6	0
Otu01802	Bacteria	Chloroflexi	Chloroflexi_unclassified	Chloroflexi_unclassified	Chloroflexi_unclassified	Chloroflexi_unclassified	555	0	6	39	14	10	8	11	10	24	12	5	18	3	17	23	19	1	0	4	11	2	19	16	7	3	4	1	6	1	15	3	0	0	0	9	5	5	1	3	8	0	10
Otu01803	Bacteria	Acidobacteria	Thermoanaerobaculia	Thermoanaerobaculales	Thermoanaerobaculaceae	Subgroup_10	662	0	0	2	1	0	2	20	7	16	58	30	39	13	17	17	7	1	0	0	1	5	4	1	11	8	4	4	11	0	5	2	0	1	0	3	8	14	4	1	1	0	1
Otu01804	Bacteria	Proteobacteria	Alphaproteobacteria	Sphingomonadales	Sphingomonadaceae	Altererythrobacter	483	20	15	6	1	0	2	0	0	5	1	5	1	4	29	6	80	14	1	3	0	0	0	0	0	0	0	0	1	9	9	3	20	45	14	1	0	0	0	4	9	42	30
Otu01805	Bacteria	Actinobacteria	Actinobacteria	Pseudonocardiales	Pseudonocardiaceae	Actinomycetospora	516	106	27	2	1	5	5	0	0	16	3	22	0	2	0	2	1	2	36	14	6	1	9	2	7	1	0	0	0	0	0	1	0	0	18	3	1	0	0	0	0	1	0
Otu01806	Archaea	Euryarchaeota	Thermoplasmata	Thermoplasmata_unclassified	Thermoplasmata_unclassified	Thermoplasmata_unclassified	228	0	0	0	1	2	0	1	13	17	12	9	2	4	6	9	3	0	0	0	0	2	2	1	2	5	2	9	23	3	4	0	0	1	0	2	0	0	3	2	0	2	0
Otu01807	Bacteria	Patescibacteria	Parcubacteria	Parcubacteria_unclassified	Parcubacteria_unclassified	Parcubacteria_unclassified	460	0	0	1	0	3	0	2	8	33	13	26	3	6	14	23	18	4	0	0	0	0	5	2	1	6	21	0	14	0	6	0	0	0	0	1	1	0	1	2	9	2	4
Otu01808	Bacteria	Bacteroidetes	Bacteroidia	Cytophagales	Microscillaceae	Ohtaekwangia	505	26	69	22	6	2	14	0	0	2	6	1	0	2	0	0	2	1	13	20	14	2	1	1	0	0	0	0	0	0	0	3	0	1	51	1	1	0	0	0	2	0	0
Otu01809	Bacteria	Bacteroidetes	Bacteroidia	Cytophagales	Microscillaceae	Microscillaceae_unclassified	1006	169	138	40	3	1	10	0	0	9	6	14	1	1	0	3	0	1	64	35	6	0	2	1	1	0	0	2	0	0	0	2	0	2	185	10	0	0	0	0	3	3	1
Otu01810	Bacteria	Proteobacteria	Alphaproteobacteria	Sphingomonadales	Sphingomonadaceae	Sphingomonas	260	55	26	3	0	1	7	1	0	10	2	15	0	1	0	1	0	1	16	8	1	0	1	1	0	0	1	0	0	0	0	0	0	5	31	3	0	0	0	0	1	2	0
Otu01811	Bacteria	Proteobacteria	Alphaproteobacteria	Sphingomonadales	Sphingomonadaceae	Sphingopyxis	324	15	9	14	3	6	3	1	2	16	6	5	2	2	3	2	7	2	4	2	9	0	3	1	0	0	0	0	0	0	0	2	6	3	4	4	2	0	0	1	2	0	1
Otu01812	Bacteria	Bacteria_unclassified	Bacteria_unclassified	Bacteria_unclassified	Bacteria_unclassified	Bacteria_unclassified	558	0	3	7	5	4	2	6	12	18	71	39	19	10	31	20	57	3	0	1	0	1	4	2	5	13	6	9	5	24	19	6	1	1	0	2	0	8	0	0	3	0	3
Otu01813	Bacteria	Proteobacteria	Gammaproteobacteria	Steroidobacterales	Steroidobacteraceae	Steroidobacter	105	9	4	4	2	0	3	0	0	5	7	4	1	0	0	0	0	1	3	0	1	0	0	0	0	0	1	0	0	1	0	0	0	0	13	1	0	1	1	1	0	0	0
Otu01814	Bacteria	Proteobacteria	Deltaproteobacteria	Desulfobacterales	Desulfobulbaceae	Desulfobulbaceae_ge	68	0	0	0	0	0	0	0	0	0	0	1	0	1	3	0	0	0	1	0	0	0	0	0	0	0	0	0	0	0	0	0	13	0	0	0	0	0	1	2	0	0	0
Otu01815	Bacteria	Proteobacteria	Alphaproteobacteria	Azospirillales	Azospirillaceae	Skermanella	139	10	11	5	2	7	8	2	0	1	0	0	0	2	0	0	1	1	3	5	6	1	0	0	1	2	0	0	0	0	0	0	0	0	2	5	3	1	0	0	0	0	0
Otu01816	Bacteria	Bacteroidetes	Ignavibacteria	Kryptoniales	BSV26	BSV26_ge	198	0	0	0	0	0	0	0	0	0	0	0	0	0	0	0	0	4	0	0	0	0	0	0	0	0	0	0	1	0	5	0	13	5	0	0	0	0	0	1	0	16	49
Otu01817	Bacteria	Firmicutes	Bacilli	Bacillales	Paenibacillaceae	Paenibacillus	262	0	0	2	0	3	4	1	2	3	7	5	7	0	3	117	5	0	1	1	2	0	1	0	2	1	1	8	3	2	6	8	1	2	0	0	0	0	1	1	3	1	3
Otu01818	Bacteria	Planctomycetes	Phycisphaerae	MSBL9	SG8-4	SG8-4_ge	384	0	0	0	0	0	0	0	0	0	0	0	0	0	0	1	12	2	0	0	0	0	0	0	0	0	1	0	9	0	47	17	7	18	0	0	0	0	0	3	4	4	23
Otu01819	Bacteria	Bacteria_unclassified	Bacteria_unclassified	Bacteria_unclassified	Bacteria_unclassified	Bacteria_unclassified	132	1	0	0	2	0	0	2	7	17	2	10	5	1	0	0	0	0	0	1	0	4	4	0	7	0	2	4	0	0	0	0	0	0	1	4	0	0	0	0	0	0	0
Otu01820	Bacteria	Chloroflexi	Anaerolineae	SBR1031	A4b	A4b_ge	513	0	0	0	0	0	0	0	0	0	3	0	9	8	17	30	31	54	0	0	0	0	0	0	0	1	1	0	20	2	30	5	6	2	0	0	0	0	0	19	54	15	8
Otu01821	Bacteria	Proteobacteria	Deltaproteobacteria	Myxococcales	Nannocystaceae	Nannocystaceae_unclassified	938	0	1	0	1	24	13	4	5	28	33	77	127	53	21	6	0	1	0	0	1	1	0	1	1	6	95	4	15	0	1	0	0	0	0	0	1	5	1	1	2	1	2
Otu01822	Bacteria	Proteobacteria	Gammaproteobacteria	Xanthomonadales	Rhodanobacteraceae	Rhodanobacteraceae_unclassified	585	87	12	4	0	1	7	2	0	6	3	15	1	2	0	0	1	2	45	18	0	0	0	0	3	0	0	0	1	0	0	5	0	2	21	9	2	2	0	0	0	1	0
Otu01823	Bacteria	Proteobacteria	Alphaproteobacteria	Alphaproteobacteria_unclassified	Alphaproteobacteria_unclassified	Alphaproteobacteria_unclassified	548	0	1	2	0	0	0	1	0	43	97	21	8	5	31	7	10	3	0	0	0	4	5	2	3	14	2	2	1	1	14	5	0	6	0	0	0	1	4	18	36	2	12
Otu01824	Bacteria	Proteobacteria	Deltaproteobacteria	Oligoflexales	0319-6G20	0319-6G20_ge	154	5	3	1	0	1	6	1	4	15	4	3	6	0	4	2	4	3	0	1	0	0	0	5	0	2	0	0	4	1	0	0	3	5	1	3	0	0	0	0	0	1	1
Otu01825	Bacteria	Proteobacteria	Alphaproteobacteria	Caulobacterales	Hyphomonadaceae	Hyphomonas	514	0	0	1	0	0	0	0	2	3	2	13	19	12	18	27	24	9	0	0	0	0	0	0	0	1	1	0	3	3	49	0	3	2	0	0	0	0	0	8	5	30	5
Otu01826	Bacteria	Verrucomicrobia	Verrucomicrobiae	Pedosphaerales	Pedosphaeraceae	ADurb.Bin063-1	229	0	0	7	3	6	2	5	0	9	2	3	0	0	0	1	0	1	1	5	10	2	2	1	3	0	19	0	2	0	0	0	0	1	1	5	4	1	3	0	1	0	0
Otu01827	Bacteria	Proteobacteria	Alphaproteobacteria	Caulobacterales	Parvularculaceae	uncultured	877	0	0	1	0	0	0	1	6	18	35	33	23	19	47	9	47	16	0	0	0	0	6	1	22	3	1	0	0	17	35	5	15	46	0	0	1	3	2	15	16	23	3
Otu01828	Bacteria	Actinobacteria	Actinobacteria	Corynebacteriales	Nocardiaceae	Rhodococcus	1082	6	3	1	1	1	2	0	0	0	0	0	1	0	0	0	2	0	8	1	0	0	0	0	0	0	0	0	0	0	0	122	0	6	0	0	0	0	0	3	1	1	0
Otu01829	Bacteria	Acidobacteria	Thermoanaerobaculia	Thermoanaerobaculales	Thermoanaerobaculaceae	Subgroup_10	513	0	0	1	2	3	2	3	6	14	7	20	8	17	8	27	13	3	0	0	1	2	1	1	0	13	0	29	21	6	29	19	1	2	0	1	0	8	2	6	12	2	2
Otu01830	Bacteria	Proteobacteria	Gammaproteobacteria	Betaproteobacteriales	Hydrogenophilaceae	Thiobacillus	69	0	0	0	0	0	0	0	0	0	0	4	3	1	0	0	0	1	0	0	0	0	0	0	0	0	5	0	1	0	0	0	1	0	0	0	0	1	0	0	0	0	1
Otu01831	Bacteria	Proteobacteria	Gammaproteobacteria	Betaproteobacteriales	Nitrosomonadaceae	MND1	66	0	4	3	1	3	3	1	0	2	0	1	0	0	2	1	0	0	0	0	1	0	0	0	0	0	0	0	1	0	0	0	0	1	0	1	1	2	1	0	1	0	0
Otu01832	Bacteria	Proteobacteria	Gammaproteobacteria	Betaproteobacteriales	Rhodocyclaceae	Sulfuritalea	212	0	0	4	5	0	2	5	13	9	4	0	2	0	0	2	1	0	2	3	4	3	1	2	2	4	1	0	14	2	3	0	0	0	3	7	0	3	0	0	1	0	0
Otu01833	Bacteria	Planctomycetes	Planctomycetacia	Pirellulales	Pirellulaceae	uncultured	392	18	14	29	2	2	3	21	10	17	5	1	0	0	7	2	0	0	3	22	2	1	15	14	4	2	0	5	1	1	2	0	0	0	20	9	1	1	3	0	1	0	0
Otu01834	Bacteria	Latescibacteria	Latescibacteria_cl	Latescibacteria_or	Latescibacteria_fa	Latescibacteria_ge	1816	0	0	0	0	0	0	1	0	2	9	29	29	67	36	292	262	17	0	0	0	0	0	0	0	2	70	1	54	28	187	46	0	2	0	0	0	3	3	20	41	8	2
Otu01835	Bacteria	Bacteroidetes	Bacteroidia	Flavobacteriales	Flavobacteriaceae	Confluentibacter	363	6	6	18	11	28	38	32	12	6	1	1	3	1	0	0	1	1	5	3	2	2	11	3	2	0	0	0	0	0	1	0	0	0	0	0	2	0	0	2	2	2	3
Otu01836	Bacteria	Acidobacteria	Subgroup_17	Subgroup_17_or	Subgroup_17_fa	Subgroup_17_ge	371	0	7	3	6	5	3	3	2	9	12	9	9	3	0	0	0	13	0	0	3	0	2	3	3	7	2	2	2	0	0	4	7	12	0	10	6	5	16	0	0	1	0
Otu01837	Bacteria	Chloroflexi	OLB14	OLB14_or	OLB14_fa	OLB14_ge	289	8	10	16	4	1	8	7	7	12	5	3	6	3	3	3	0	1	9	4	1	1	6	4	1	0	0	1	4	0	2	0	0	0	8	2	0	2	1	3	0	2	0
Otu01838	Bacteria	Proteobacteria	Gammaproteobacteria	Acidiferrobacterales	Acidiferrobacteraceae	Sulfurifustis	66	0	0	0	0	0	0	0	0	0	0	0	0	0	0	1	5	6	0	0	0	0	0	0	0	0	1	0	0	0	2	0	2	10	0	0	0	0	0	0	0	0	0
Otu01839	Bacteria	Planctomycetes	Phycisphaerae	Phycisphaerales	Phycisphaeraceae	SM1A02	474	0	0	0	0	8	7	46	10	15	22	11	13	8	34	23	15	2	0	0	38	3	2	0	2	5	6	4	14	9	6	3	0	0	0	0	0	2	2	9	9	1	4
Otu01840	Bacteria	Elusimicrobia	Elusimicrobia	MVP-88	MVP-88_fa	MVP-88_ge	379	0	0	1	0	3	1	5	1	5	8	25	15	8	13	36	39	5	0	0	1	0	0	1	0	3	19	3	13	3	10	5	0	0	0	0	0	0	0	3	4	0	0
Otu01841	Bacteria	Actinobacteria	Acidimicrobiia	Microtrichales	Ilumatobacteraceae	Ilumatobacter	846	27	50	53	55	6	7	10	6	6	1	3	3	2	2	2	0	0	46	24	13	3	8	14	9	2	1	0	0	1	1	1	0	2	10	22	9	1	3	0	0	0	1
Otu01842	Bacteria	Latescibacteria	Latescibacteria_cl	Latescibacteria_or	Latescibacteria_fa	Latescibacteria_ge	404	0	0	0	0	0	0	0	1	0	6	2	16	2	4	2	0	18	0	0	0	0	0	0	0	4	11	3	20	1	18	3	24	34	0	0	0	2	0	4	2	7	9
Otu01843	Bacteria	Proteobacteria	Alphaproteobacteria	Rhodospirillales	Magnetospiraceae	Magnetovibrio	783	0	0	0	0	0	0	0	0	0	0	0	0	0	3	1	3	12	0	0	0	0	0	0	0	0	1	0	7	36	1	0	4	8	0	0	0	0	0	3	10	268	24
Otu01844	Bacteria	Actinobacteria	Actinobacteria	Frankiales	uncultured	uncultured_ge	410	51	19	4	5	0	5	0	0	4	1	12	1	1	1	2	0	4	9	10	2	0	1	2	3	0	0	0	1	1	0	12	0	0	18	6	0	0	0	0	0	1	1
Otu01845	Bacteria	Proteobacteria	Deltaproteobacteria	Desulfuromonadales	Desulfuromonadales_unclassified	Desulfuromonadales_unclassified	377	0	0	0	1	7	7	29	27	41	57	5	0	1	8	1	1	2	0	2	2	0	18	3	6	4	1	0	0	0	1	0	0	0	0	0	0	0	1	0	0	1	0
Otu01846	Bacteria	Spirochaetes	Leptospirae	Leptospirales	Leptospiraceae	RBG-16-49-21	825	0	0	0	0	0	0	0	0	0	0	0	0	1	0	0	15	2	0	0	0	0	0	0	0	0	4	0	15	0	46	2	41	80	0	0	0	0	0	3	3	24	119
Otu01847	Bacteria	Planctomycetes	Phycisphaerae	Phycisphaerales	Phycisphaeraceae	Phycisphaeraceae_unclassified	506	0	1	8	3	7	6	28	14	29	26	6	8	9	21	6	3	3	0	1	4	4	7	3	3	10	14	6	20	4	7	0	1	1	0	10	1	8	9	2	4	1	3
Otu01848	Bacteria	Proteobacteria	Alphaproteobacteria	Rhodospirillales	Rhodospirillaceae	uncultured	240	10	2	8	0	2	3	3	3	16	3	5	4	3	1	6	11	2	5	6	3	2	2	2	1	4	1	1	8	2	2	2	0	0	6	4	3	0	0	0	3	1	0
Otu01849	Bacteria	Proteobacteria	Alphaproteobacteria	Sphingomonadales	Sphingomonadaceae	Sphingomonas	168	26	6	2	0	2	6	0	1	5	2	6	2	4	1	6	15	17	4	3	0	0	0	0	0	0	0	0	0	0	0	0	0	0	3	0	0	0	0	0	0	0	0
Otu01850	Bacteria	Chloroflexi	Dehalococcoidia	S085	S085_fa	S085_ge	279	0	1	0	0	0	0	0	0	2	1	1	2	8	3	1	1	1	0	1	0	0	0	0	0	0	12	0	11	1	11	1	3	22	0	0	0	0	0	1	1	3	1
Otu01851	Bacteria	Proteobacteria	Alphaproteobacteria	Sphingomonadales	Sphingomonadaceae	Sphingomonas	251	0	3	2	1	0	4	0	0	2	0	2	0	2	0	3	2	2	3	2	0	0	0	0	4	0	0	0	0	0	1	13	0	4	0	3	0	0	0	0	1	1	1
Otu01852	Bacteria	Proteobacteria	Alphaproteobacteria	Rhizobiales	Rhizobiales_Incertae_Sedis	Bauldia	65	0	0	0	0	0	1	1	3	2	5	2	3	3	3	0	2	0	0	0	0	0	1	0	1	1	2	0	1	1	3	0	0	0	0	0	0	0	0	2	4	1	1
Otu01853	Bacteria	Proteobacteria	Alphaproteobacteria	Rhodospirillales	Rhodopirillaceae	Defluviicoccus	317	1	4	1	0	4	6	3	2	4	15	2	22	3	13	9	0	1	1	0	10	11	10	6	3	1	7	3	1	4	3	1	1	0	1	5	6	3	12	1	1	1	3
Otu01854	Bacteria	Planctomycetes	Planctomycetacia	Planctomycetales	uncultured	uncultured_ge	508	0	17	36	24	28	22	9	10	11	2	1	7	1	0	0	0	1	3	17	20	4	17	21	10	1	0	0	0	0	0	3	0	0	0	13	4	3	1	1	0	0	0
Otu01855	Bacteria	Bacteroidetes	Bacteroidia	Cytophagales	Cyclobacteriaceae	Fulvivirga	879	0	0	0	0	0	0	0	5	7	10	5	4	8	44	72	59	4	0	0	0	0	0	0	0	2	4	8	51	10	91	19	3	0	0	0	0	0	0	52	112	14	2
Otu01856	Bacteria	Firmicutes	Bacilli	Bacillales	Alicyclobacillaceae	Tumebacillus	410	1	1	1	8	62	23	2	16	11	3	1	26	1	0	13	0	7	2	4	19	0	4	4	1	1	0	0	1	0	1	5	2	21	3	10	0	0	0	1	2	1	1
Otu01857	Bacteria	Proteobacteria	Deltaproteobacteria	NB1-j	NB1-j_fa	NB1-j_ge	732	0	0	0	0	0	0	0	4	4	10	4	13	69	30	28	6	24	1	0	0	0	0	3	0	5	4	32	74	22	32	14	1	4	0	0	0	0	24	14	5	6	4
Otu01858	Bacteria	Bacteroidetes	Bacteroidia	Chitinophagales	Chitinophagaceae	uncultured	775	325	25	6	0	0	44	0	0	5	5	9	0	4	0	3	4	2	12	13	0	0	2	0	2	0	0	0	0	1	0	26	0	0	9	2	1	0	3	0	1	0	0
Otu01859	Bacteria	Spirochaetes	MVP-15	MVP-15_or	MVP-15_fa	MVP-15_ge	285	1	0	0	0	0	0	0	0	1	0	4	4	2	2	10	17	7	0	1	0	2	0	0	0	5	3	0	2	2	4	1	3	2	0	2	0	0	3	11	3	7	1
Otu01860	Bacteria	Chloroflexi	Anaerolineae	Ardenticatenales	uncultured	uncultured_ge	66	0	0	0	0	0	0	0	0	0	1	5	6	1	2	5	2	0	0	0	0	0	0	0	0	0	2	0	2	0	3	0	0	0	0	0	0	0	0	1	4	2	2
Otu01861	Bacteria	Planctomycetes	Planctomycetacia	Gemmatales	Gemmataceae	Gemmata	660	2	31	30	27	36	6	6	4	5	5	21	30	7	2	1	0	2	14	7	8	2	1	4	4	3	11	2	0	0	2	1	0	0	5	12	30	6	5	2	0	0	0
Otu01862	Bacteria	Acidobacteria	Acidobacteriia	Solibacterales	Solibacteraceae_(Subgroup_3)	Candidatus_Solibacter	1503	0	13	57	48	10	15	32	36	58	79	26	7	16	5	11	1	4	3	30	43	16	12	10	29	9	8	10	3	4	5	4	2	0	1	41	13	18	13	0	1	0	0
Otu01863	Bacteria	Actinobacteria	Actinobacteria	Streptomycetales	Streptomycetaceae	Streptomyces	761	0	49	58	43	24	18	26	12	40	16	2	9	1	1	2	0	0	0	9	9	16	32	28	32	1	1	0	0	2	0	1	0	1	0	21	30	0	0	0	0	0	0
Otu01864	Bacteria	Nitrospirae	Thermodesulfovibrionia	uncultured	uncultured_fa	uncultured_ge	1149	0	0	0	0	0	7	33	7	33	17	5	1	0	0	2	3	8	0	0	0	9	20	8	3	12	1	0	2	10	9	10	2	0	0	1	2	4	1	0	0	103	0
Otu01865	Bacteria	Proteobacteria	Alphaproteobacteria	Rhodobacterales	Rhodobacteraceae	Amylibacter	260	9	8	4	2	3	6	9	5	6	2	4	6	5	7	2	5	3	5	4	1	1	4	1	1	2	7	0	5	3	3	0	3	1	0	2	3	3	3	0	0	0	0
Otu01866	Bacteria	Proteobacteria	Alphaproteobacteria	Rhodobacterales	Rhodobacteraceae	Rhodobacteraceae_unclassified	1232	0	1	1	0	0	0	1	3	52	54	31	29	18	26	60	85	11	0	0	0	0	0	0	4	18	26	0	43	20	79	4	0	2	0	0	0	1	2	36	62	17	4
Otu01867	Bacteria	Proteobacteria	Deltaproteobacteria	Syntrophobacterales	Syntrophaceae	uncultured	666	0	0	0	0	0	0	1	0	0	0	1	3	4	2	3	0	2	0	0	0	0	0	0	0	1	2	0	13	0	15	3	42	184	0	0	0	0	0	4	3	8	8
Otu01868	Bacteria	Proteobacteria	Gammaproteobacteria	Xanthomonadales	Xanthomonadales_unclassified	Xanthomonadales_unclassified	263	0	3	4	2	8	5	11	6	9	8	6	2	2	5	18	11	2	1	1	1	3	3	2	3	3	1	1	7	5	7	2	0	0	0	2	1	3	2	2	1	1	0
Otu01869	Bacteria	Acidobacteria	Subgroup_6	Subgroup_6_or	Subgroup_6_fa	Subgroup_6_ge	823	162	81	10	3	0	8	2	9	17	4	2	0	3	0	2	0	0	36	12	9	2	1	3	1	0	0	0	0	1	0	1	0	2	122	8	1	0	0	0	0	0	0
Otu01870	Bacteria	Acidobacteria	Subgroup_6	Subgroup_6_or	Subgroup_6_fa	Subgroup_6_ge	89	7	1	0	0	0	0	1	1	1	0	1	2	0	0	0	3	2	2	0	0	0	0	1	0	0	0	0	2	0	3	0	2	5	4	2	0	1	0	1	1	2	4
Otu01871	Bacteria	Proteobacteria	Gammaproteobacteria	Gammaproteobacteria_unclassified	Gammaproteobacteria_unclassified	Gammaproteobacteria_unclassified	578	0	7	10	3	7	1	17	11	16	7	20	22	21	8	21	27	6	0	2	3	0	2	11	4	5	8	6	17	8	23	4	1	0	0	5	0	3	3	6	3	1	6
Otu01872	Bacteria	Planctomycetes	Planctomycetacia	Pirellulales	Pirellulaceae	uncultured	292	0	5	3	1	2	2	8	9	28	5	3	2	0	2	1	0	0	1	3	4	5	2	4	0	5	16	0	1	0	0	0	0	1	0	0	6	9	2	0	0	0	0
Otu01873	Bacteria	Planctomycetes	Phycisphaerae	CCM11a	CCM11a_fa	CCM11a_ge	316	0	0	0	0	0	0	1	0	3	5	9	5	8	19	23	19	4	0	0	0	0	0	0	0	3	2	1	11	8	8	2	0	0	0	0	1	0	1	6	22	3	40
Otu01874	Bacteria	Nitrospirae	Nitrospira	Nitrospirales	Nitrospiraceae	Nitrospira	461	34	24	6	7	6	4	0	0	4	0	3	0	0	8	14	19	3	11	10	1	0	0	0	2	0	0	0	0	2	0	1	1	0	40	14	2	0	0	1	2	0	0
Otu01875	Bacteria	Actinobacteria	Acidimicrobiia	Microtrichales	Microtrichales_unclassified	Microtrichales_unclassified	404	0	1	1	0	9	2	6	18	21	12	15	32	6	20	4	30	2	0	1	8	9	2	9	5	8	5	0	2	3	7	1	0	1	1	1	10	0	2	4	3	0	1
Otu01876	Bacteria	Planctomycetes	Planctomycetacia	Pirellulales	Pirellulaceae	uncultured	284	0	1	0	2	3	7	6	4	14	0	5	6	1	5	7	5	8	0	0	8	3	4	2	2	3	3	0	4	1	5	1	7	6	0	3	1	1	1	2	3	5	3
Otu01877	Bacteria	Actinobacteria	Nitriliruptoria	Euzebyales	Euzebyaceae	uncultured	350	0	4	5	2	1	2	61	17	10	11	1	14	7	0	2	2	2	1	1	4	2	12	3	5	2	3	9	4	0	2	0	0	3	1	1	3	1	4	0	0	2	0
Otu01878	Bacteria	Proteobacteria	Gammaproteobacteria	Betaproteobacteriales	B1-7BS	B1-7BS_ge	226	8	15	0	0	2	2	0	3	4	4	7	0	0	0	3	1	0	9	8	4	0	2	5	2	1	0	0	4	0	1	0	0	3	22	4	0	6	0	0	1	3	2
Otu01879	Bacteria	Planctomycetes	Phycisphaerae	Tepidisphaerales	WD2101_soil_group	WD2101_soil_group_ge	543	0	8	13	10	8	11	10	3	8	4	8	20	11	0	0	0	6	0	16	21	7	7	3	7	3	17	3	0	0	0	0	0	0	0	15	19	7	7	0	0	0	0
Otu01880	Bacteria	Proteobacteria	Alphaproteobacteria	Rhizobiales	Rhodomicrobiaceae	Rhodomicrobium	989	22	63	32	5	258	79	1	0	3	0	2	5	2	9	0	1	3	17	6	23	0	0	0	6	1	36	0	1	1	4	7	0	1	27	1	15	1	0	2	0	0	2
Otu01881	Bacteria	Proteobacteria	Gammaproteobacteria	Xanthomonadales	Xanthomonadales_unclassified	Xanthomonadales_unclassified	596	0	2	22	15	13	14	34	21	12	2	0	1	92	1	2	1	1	1	1	3	2	10	3	4	4	1	3	5	2	29	2	2	1	4	3	0	1	0	6	8	1	4
Otu01882	Bacteria	Actinobacteria	Acidimicrobiia	uncultured	uncultured_fa	uncultured_ge	232	27	20	13	4	0	3	1	1	11	0	2	0	1	0	0	0	0	17	6	1	2	2	1	2	0	0	0	0	0	2	0	0	0	11	2	1	3	0	0	0	0	0
Otu01883	Bacteria	Proteobacteria	Gammaproteobacteria	Betaproteobacteriales	Rhodocyclaceae	Rhodocyclaceae_unclassified	349	0	2	2	1	0	0	0	1	3	0	0	1	0	1	2	4	0	1	0	0	0	1	4	0	0	2	0	9	3	26	4	1	0	0	6	1	3	0	1	11	4	1
Otu01884	Bacteria	WS4	WS4_cl	WS4_or	WS4_fa	WS4_ge	142	0	2	0	1	0	0	0	3	6	2	1	0	0	0	0	0	0	11	1	2	0	0	0	0	0	1	2	0	0	0	1	2	5	11	5	2	0	1	0	0	2	2
Otu01885	Bacteria	Acidobacteria	Subgroup_6	Subgroup_6_or	Subgroup_6_fa	Subgroup_6_ge	69	0	2	2	0	0	0	0	6	1	2	0	1	2	1	0	2	0	1	0	0	0	0	0	1	0	1	0	1	0	0	0	0	1	0	1	1	0	1	1	0	0	1
Otu01886	Bacteria	Proteobacteria	Alphaproteobacteria	Rhizobiales	Devosiaceae	Arsenicitalea	87	1	4	1	0	7	1	4	3	7	3	1	1	1	0	1	1	0	1	1	0	1	0	1	1	0	1	0	0	0	0	0	0	0	1	1	1	1	0	2	1	0	0
Otu01887	Bacteria	Planctomycetes	Planctomycetes_unclassified	Planctomycetes_unclassified	Planctomycetes_unclassified	Planctomycetes_unclassified	64	0	0	1	0	3	2	0	0	2	1	0	3	1	3	2	1	3	0	0	2	0	0	0	1	1	1	0	0	1	3	0	0	0	0	1	0	1	1	0	1	0	0
Otu01888	Bacteria	Proteobacteria	Gammaproteobacteria	OM182_clade	OM182_clade_fa	OM182_clade_ge	781	0	0	0	0	0	0	0	0	1	3	23	4	8	53	79	39	8	0	0	0	0	0	0	0	4	10	0	56	16	89	1	1	3	0	0	0	0	0	19	43	1	3
Otu01889	Bacteria	Bacteria_unclassified	Bacteria_unclassified	Bacteria_unclassified	Bacteria_unclassified	Bacteria_unclassified	857	0	2	1	4	1	16	37	21	22	7	11	74	21	3	0	0	4	0	2	2	35	6	9	28	6	50	14	1	0	0	0	0	5	0	5	9	14	7	0	2	1	0
Otu01890	Bacteria	Bacteroidetes	Bacteroidia	Bacteroidales	Paludibacteraceae	uncultured	776	14	10	3	0	0	2	0	1	1	0	2	0	0	0	0	6	2	114	38	19	2	2	2	4	0	3	0	0	3	0	3	0	2	119	25	1	0	1	3	1	2	3
Otu01891	Bacteria	Proteobacteria	Alphaproteobacteria	Acetobacterales	Acetobacteraceae	Roseomonas	268	7	3	0	1	0	2	1	0	3	1	4	0	2	0	4	2	3	12	3	2	0	0	0	3	0	0	0	0	0	0	29	0	0	0	2	1	0	0	0	0	0	0
Otu01892	Archaea	Nanoarchaeaeota	Woesearchaeia	Woesearchaeia_or	Woesearchaeia_fa	Woesearchaeia_ge	1009	0	0	0	0	0	0	0	0	0	0	0	0	1	1	1	15	5	0	0	0	0	0	0	0	0	0	0	1	0	6	1	25	3	0	0	0	0	0	6	25	10	10
Otu01893	Bacteria	Proteobacteria	Alphaproteobacteria	Rhizobiales	KF-JG30-B3	KF-JG30-B3_ge	1235	0	28	37	27	66	49	29	15	6	1	33	39	7	17	8	12	40	7	8	44	11	5	5	13	0	15	0	3	0	11	5	32	26	0	2	19	3	0	0	13	2	25
Otu01894	Archaea	Crenarchaeota	Bathyarchaeia	Bathyarchaeia_or	Bathyarchaeia_fa	Bathyarchaeia_ge	398	0	0	0	0	0	0	0	0	0	0	0	0	0	8	5	3	7	0	0	0	0	0	0	0	0	0	0	5	0	14	1	13	39	0	0	0	0	0	1	2	23	97
Otu01895	Bacteria	Planctomycetes	OM190	OM190_or	OM190_fa	OM190_ge	335	0	2	2	2	5	0	23	10	9	5	10	8	11	12	1	6	1	0	0	4	1	6	0	2	2	5	6	22	0	1	0	0	0	0	1	4	9	1	12	5	0	8
Otu01896	Bacteria	Bacteroidetes	Bacteroidia	Flavobacteriales	Flavobacteriaceae	Flavobacteriaceae_unclassified	964	0	103	180	46	38	22	41	37	40	11	4	44	4	0	1	1	4	0	21	16	6	17	5	13	2	1	0	0	0	0	0	0	1	2	22	9	4	2	2	0	0	0
Otu01897	Bacteria	Actinobacteria	0319-7L14	0319-7L14_or	0319-7L14_fa	0319-7L14_ge	207	0	10	3	5	2	2	8	0	0	2	1	0	0	0	0	0	2	3	18	7	1	0	2	3	0	0	0	0	0	1	1	0	0	7	10	0	0	0	0	0	0	0
Otu01898	Bacteria	Chloroflexi	Anaerolineae	Ardenticatenales	uncultured	uncultured_ge	65	0	0	0	0	0	0	0	0	2	8	4	5	0	5	2	0	0	0	0	0	0	0	0	0	2	1	0	1	0	2	0	0	0	0	0	0	0	2	1	0	0	0
Otu01899	Bacteria	Acidobacteria	Acidobacteriia	Solibacterales	Solibacteraceae_(Subgroup_3)	Bryobacter	287	28	8	0	0	1	2	0	1	4	0	8	0	0	0	3	0	0	16	6	1	1	0	0	2	0	0	0	1	0	0	0	0	2	35	3	0	0	0	0	0	0	0
Otu01900	Bacteria	Actinobacteria	MB-A2-108	MB-A2-108_or	MB-A2-108_fa	MB-A2-108_ge	266	0	3	3	2	7	5	9	3	4	0	15	9	9	5	8	6	2	2	5	7	5	0	0	1	3	2	1	6	1	8	0	0	4	0	4	0	1	1	1	1	3	0
Otu01901	Bacteria	Actinobacteria	Thermoleophilia	Gaiellales	Gaiellaceae	Gaiella	160	1	2	1	0	0	0	1	5	12	5	5	3	3	7	4	6	1	0	1	1	0	2	1	0	0	0	2	7	6	1	2	2	6	0	0	1	1	0	1	2	5	5
Otu01902	Bacteria	Firmicutes	Bacilli	Bacillales	Thermoactinomycetaceae	Shimazuella	125	0	0	0	0	1	1	3	7	13	4	12	3	6	1	4	0	1	0	0	0	0	2	2	2	0	0	5	0	2	0	0	0	0	0	1	0	0	1	0	1	0	0
Otu01903	Bacteria	Firmicutes	Erysipelotrichia	Erysipelotrichales	Erysipelotrichaceae	Erysipelothrix	587	0	0	0	0	2	0	0	0	2	0	1	1	2	1	1	2	0	46	25	4	4	1	1	5	3	8	0	1	2	0	1	0	0	49	21	8	3	5	3	13	5	4
Otu01904	Bacteria	Firmicutes	Clostridia	Clostridiales	Clostridiaceae_1	Clostridium_sensu_stricto_10	221	2	6	1	2	8	4	1	2	9	5	3	3	1	1	4	0	4	3	2	1	0	11	2	0	2	2	1	2	1	2	1	0	12	1	7	1	1	0	0	0	0	0
Otu01905	Bacteria	Firmicutes	Clostridia	Clostridiales	Clostridiaceae_1	Oxobacter	150	0	2	0	1	7	3	2	4	2	0	5	5	5	2	0	0	0	1	0	4	3	3	0	0	1	6	2	0	0	0	0	0	1	5	0	1	2	0	0	0	1	0
Otu01906	Bacteria	Firmicutes	Bacilli	Bacillales	Family_XII	Exiguobacterium	1506	0	0	0	0	0	0	0	0	0	0	0	0	0	0	0	0	0	14	5	1	0	0	1	8	0	0	0	0	1	0	16	0	0	0	0	0	0	0	0	1	0	0
Otu01907	Bacteria	Planctomycetes	Phycisphaerae	Pla1_lineage	Pla1_lineage_fa	Pla1_lineage_ge	478	0	0	0	0	0	5	7	6	9	8	24	26	11	28	15	21	4	0	0	0	2	2	3	4	3	29	2	8	3	18	1	5	12	0	0	0	2	6	1	5	2	4
Otu01908	Bacteria	Planctomycetes	Planctomycetacia	Isosphaerales	Isosphaeraceae	Isosphaeraceae_unclassified	206	54	10	3	1	1	3	0	0	4	0	3	0	1	0	2	0	1	4	8	0	0	0	0	0	0	0	0	0	0	0	0	0	0	26	1	1	0	0	0	0	0	0
Otu01909	Bacteria	Proteobacteria	Deltaproteobacteria	Myxococcales	BIrii41	BIrii41_ge	638	0	2	6	0	57	25	13	17	24	18	20	77	12	13	3	35	2	0	2	13	5	5	0	2	3	10	0	4	1	14	0	0	0	0	0	2	5	4	8	30	13	0
Otu01910	Bacteria	Proteobacteria	Deltaproteobacteria	Myxococcales	Nannocystaceae	Nannocystis	349	1	1	1	1	20	35	6	10	14	2	4	2	1	0	1	1	1	2	0	126	2	4	2	4	1	2	0	0	0	0	0	0	1	0	0	8	0	0	0	0	0	0
Otu01911	Bacteria	Zixibacteria	Zixibacteria_cl	Zixibacteria_or	Zixibacteria_fa	Zixibacteria_ge	601	0	0	0	0	0	0	0	0	0	1	0	0	1	1	0	8	24	0	0	0	0	0	0	0	0	1	0	0	0	1	1	76	82	0	0	0	0	0	3	6	130	11
Otu01912	Bacteria	Chloroflexi	OLB14	OLB14_or	OLB14_fa	OLB14_ge	947	37	78	33	12	1	2	3	7	13	1	16	23	8	15	6	27	14	40	30	6	2	4	1	1	0	22	0	4	0	3	1	22	19	59	9	4	3	2	4	2	24	8
Otu01913	Bacteria	Acidobacteria	Subgroup_22	Subgroup_22_or	Subgroup_22_fa	Subgroup_22_ge	899	0	0	0	0	0	0	0	0	1	0	0	0	8	32	192	182	33	0	0	0	0	0	0	0	0	1	1	32	13	65	40	0	1	0	0	0	0	0	3	2	0	1
Otu01914	Bacteria	Actinobacteria	Thermoleophilia	Solirubrobacterales	67-14	67-14_ge	353	48	13	9	0	8	6	0	2	0	1	4	0	0	0	2	0	0	13	3	3	1	0	0	2	1	0	0	0	1	0	0	0	1	18	4	3	1	0	0	0	1	0
Otu01915	Bacteria	Proteobacteria	Deltaproteobacteria	Myxococcales	Eel-36e1D6	Eel-36e1D6_ge	732	0	0	1	3	20	10	17	11	13	77	53	46	47	16	5	3	8	0	0	4	3	5	2	3	6	16	2	7	1	1	0	0	3	0	2	5	4	4	2	2	0	8
Otu01916	Bacteria	Proteobacteria	Deltaproteobacteria	Myxococcales	BIrii41	BIrii41_ge	467	0	21	16	6	53	24	13	6	7	7	7	3	7	0	11	2	0	0	5	10	0	0	2	6	3	11	0	6	1	1	0	0	0	0	6	3	4	2	0	0	0	0
Otu01917	Bacteria	Proteobacteria	Gammaproteobacteria	Oceanospirillales	Pseudohongiellaceae	Pseudohongiella	349	0	0	0	0	0	0	1	0	4	8	6	5	9	37	43	72	4	0	0	2	0	1	0	0	0	0	0	12	1	22	1	2	6	0	0	0	0	0	7	4	1	1
Otu01918	Bacteria	Patescibacteria	Saccharimonadia	Saccharimonadales	Saccharimonadales_fa	Saccharimonadales_ge	226	0	1	3	1	2	3	13	6	9	9	2	0	2	13	5	16	1	0	1	0	2	1	1	0	2	1	1	12	5	8	2	0	1	0	6	0	2	0	4	7	1	3
Otu01919	Bacteria	Chloroflexi	Anaerolineae	SBR1031	A4b	A4b_ge	475	0	9	9	2	10	0	2	2	5	5	14	26	13	22	7	7	12	1	3	6	1	2	3	0	2	13	1	1	2	10	0	12	11	0	3	1	0	0	7	6	5	12
Otu01920	Bacteria	Acidobacteria	Subgroup_17	Subgroup_17_or	Subgroup_17_fa	Subgroup_17_ge	73	0	0	0	0	0	0	0	0	0	0	0	0	0	0	0	0	0	0	0	0	0	0	0	0	0	0	0	0	0	2	0	2	12	0	0	0	0	0	0	0	0	3
Otu01921	Bacteria	Nitrospirae	Nitrospira	Nitrospirales	Nitrospiraceae	Nitrospira	955	3	29	24	28	3	5	13	23	25	12	18	43	18	1	1	0	5	7	20	4	0	1	7	2	1	51	8	0	0	0	0	0	0	30	43	1	4	6	0	2	1	0
Otu01922	Bacteria	Planctomycetes	Planctomycetacia	Pirellulales	Pirellulaceae	Pir4_lineage	823	0	1	1	0	1	21	184	71	144	8	1	1	1	6	17	57	3	0	0	8	15	10	4	12	1	5	0	0	7	10	6	13	7	0	0	0	0	2	5	7	6	7
Otu01923	Bacteria	Planctomycetes	Planctomycetacia	Pirellulales	Pirellulaceae	Blastopirellula	1131	8	22	33	19	41	37	40	37	61	32	24	12	8	16	3	3	1	8	29	40	7	25	25	20	1	13	3	8	1	2	1	0	0	8	13	19	8	3	0	1	0	9
Otu01924	Bacteria	Actinobacteria	Nitriliruptoria	Euzebyales	Euzebyaceae	Euzebya	231	0	6	10	19	6	6	16	15	11	4	3	1	4	1	0	1	0	2	2	7	0	3	3	1	0	0	0	1	0	0	0	0	0	0	2	1	4	0	0	1	0	0
Otu01925	Archaea	Euryarchaeota	Thermoplasmata	Thermoplasmata_unclassified	Thermoplasmata_unclassified	Thermoplasmata_unclassified	1134	0	0	0	0	0	1	0	23	595	79	3	2	2	0	5	3	3	0	0	0	0	20	136	16	1	1	0	0	0	0	2	0	1	0	0	0	0	1	0	2	1	0
Otu01926	Bacteria	Planctomycetes	Phycisphaerae	Phycisphaerales	Phycisphaeraceae	uncultured	649	0	0	3	4	32	7	4	1	1	0	10	16	18	13	10	5	38	0	2	19	2	0	1	2	5	18	15	9	2	18	9	24	19	0	5	6	3	0	3	14	14	5
Otu01927	Bacteria	Planctomycetes	Phycisphaerae	Phycisphaerales	Phycisphaeraceae	Phycisphaeraceae_unclassified	984	0	0	0	0	0	0	0	4	44	33	54	45	15	40	18	14	5	0	0	0	0	2	5	4	27	94	18	76	6	29	6	2	3	0	0	0	0	5	23	12	2	12
Otu01928	Bacteria	Bacteria_unclassified	Bacteria_unclassified	Bacteria_unclassified	Bacteria_unclassified	Bacteria_unclassified	209	0	1	3	4	1	1	0	2	13	5	10	6	3	4	6	3	1	0	1	0	1	0	4	2	3	7	3	10	1	8	1	0	0	0	0	0	5	3	0	1	0	1
Otu01929	Bacteria	Chloroflexi	Ktedonobacteria	C0119	C0119_fa	C0119_ge	1055	67	97	10	4	6	3	1	4	10	1	12	2	3	0	2	0	3	116	17	4	5	2	1	2	0	5	0	1	0	1	4	1	0	49	16	1	1	1	0	1	0	2
Otu01930	Bacteria	Proteobacteria	Gammaproteobacteria	Alteromonadales	Shewanellaceae	Shewanella	754	0	0	0	0	0	0	0	0	1	0	0	0	1	0	1	6	0	0	0	0	0	0	0	0	0	5	0	14	0	49	4	0	6	0	1	0	0	0	4	4	0	0
Otu01931	Bacteria	Bacteroidetes	Ignavibacteria	Ignavibacteriales	Ignavibacteriaceae	Ignavibacterium	359	0	0	0	0	0	0	0	3	0	3	9	12	2	7	7	6	14	0	0	0	0	0	0	1	1	22	0	7	2	5	1	10	6	0	0	0	0	0	1	14	21	10
Otu01932	Bacteria	Proteobacteria	Alphaproteobacteria	Rhizobiales	Labraceae	Labrys	411	19	20	12	9	4	7	3	6	8	4	8	3	1	1	5	1	12	7	8	2	1	1	4	0	1	2	0	1	1	6	2	15	20	6	3	2	1	1	0	2	5	0
Otu01933	Bacteria	Proteobacteria	Gammaproteobacteria	Xanthomonadales	Xanthomonadaceae	Xanthomonadaceae_unclassified	1091	0	9	190	253	58	18	7	3	8	1	0	0	2	0	0	1	0	0	11	40	0	1	4	0	0	0	0	0	0	1	0	0	0	0	1	7	0	0	0	0	0	0
Otu01934	Bacteria	Bacteroidetes	Bacteroidia	Flavobacteriales	Flavobacteriaceae	Flavobacterium	846	0	0	0	0	3	3	23	7	19	2	13	2	19	1	6	19	9	0	0	1	0	10	2	0	0	3	0	2	0	0	0	0	2	0	0	0	0	6	3	1	1	1
Otu01935	Bacteria	Acidobacteria	Subgroup_17	Subgroup_17_or	Subgroup_17_fa	Subgroup_17_ge	419	0	4	2	0	1	2	5	7	10	9	9	1	4	13	13	10	4	4	10	7	4	4	5	0	4	0	8	14	2	14	9	0	5	8	9	0	6	1	2	2	2	1
Otu01936	Bacteria	Proteobacteria	Deltaproteobacteria	Myxococcales	BIrii41	BIrii41_ge	1081	0	14	9	20	166	18	12	4	8	24	6	2	1	1	0	0	3	0	15	77	8	5	1	4	0	5	0	1	0	0	0	0	0	0	25	37	5	1	0	0	2	0
Otu01937	Bacteria	Proteobacteria	Deltaproteobacteria	Myxococcales	Nannocystaceae	Nannocystis	256	6	4	6	20	8	11	0	1	5	5	9	5	1	1	1	1	0	0	4	2	0	0	0	0	9	3	0	3	0	0	0	1	2	5	1	1	4	11	1	0	0	0
Otu01938	Bacteria	Planctomycetes	Phycisphaerae	Phycisphaerales	Phycisphaeraceae	uncultured	152	0	0	0	0	0	1	4	1	9	3	2	1	4	13	5	6	3	0	0	0	0	0	1	0	0	0	2	3	4	10	2	0	2	0	0	0	0	1	5	5	0	2
Otu01939	Bacteria	Patescibacteria	Parcubacteria	Parcubacteria_unclassified	Parcubacteria_unclassified	Parcubacteria_unclassified	374	0	0	0	0	0	0	2	0	3	2	31	26	20	16	12	6	6	0	0	0	0	1	0	0	3	28	0	34	2	10	0	3	1	0	0	0	0	0	8	4	3	4
Otu01940	Bacteria	Acidobacteria	Thermoanaerobaculia	Thermoanaerobaculales	Thermoanaerobaculaceae	Subgroup_10	772	0	0	0	0	0	0	0	1	9	4	1	0	12	44	146	31	1	0	0	0	0	0	0	0	1	0	3	33	8	37	7	2	1	0	0	0	0	0	39	3	3	2
[truncated: 24,591 more rows]
[truncated: 41 more columns]

## Sheet: Metadata
Project	SLAC Groundwater Quality SFA
Location	Riverton research site, Installation pit 2
	N 42.98864, W 108.40006
Dataset title	RVT_Sediment_2017_16S_OTUs
Date range	4/5/2017-9/13/2017
[truncated: 20 more rows]
